# Supplementary material for: Mutation of the RelA(p65) Thr505 phosphosite disrupts the DNA replication stress response leading to CHK1 inhibitor resistance
Source: Biochem J. 2022 Oct 14;479(19):2087–113. doi: 10.1042/BCJ20220089 (PMC9704643; doi:10.1042/BCJ20220089)
Supplement: Supplementary Material 2 [file BCJ-479-2087-s2.pdf]

## Sheet: Legend
Supplementary Data File 1
Tab 1 - Total Proteome Data: Column headers detail outputs from Proteome Discoverer (PD) Software (ThermoFisher Scientific) for the total quantitative proteome datasets for WT_Control, WT_Chk1i, T505A-Control, T505A_Chk1i, cREL_Control, cREL_Chk1i. Detailed explanation of all column headers can be found in the PD User guide. Included in the table is information about protein identity and confiden…
Tab 2 - Phosphopeptide data: Column headers detail outputs from Proteome Discoverer (PD) Software (ThermoFisher Scientific) for the quantitative phosphopeptide datasets for WT_Control, WT_Chk1i, T505A-Control, T505A_Chk1i, cREL_Control, cREL_Chk1i. Detailed explanation of the column headers can be found in the PD User guide. Included in the table is information about peptide identity and the mast…

## Sheet: 1 Proteome
Order	Order	Protein Group IDs	Accession	Description	GN	MW in kDa	calc pI	Mascot Score	% Coverage in Mascot	Number of PSMs (Mascot)	Number of Peptides (Mascot)	Number of Razor Peptides	Abundances Normalized F27 128 Sample Control T505A Rep3	Abundances Normalized F28 127 Sample Control T505A Rep2	Abundances Normalized F29 126 Sample Control T505A Rep1	Abundances Normalized F30 129 Sample Control T505A Rep4	Abundances Normalized F31 130 Sample Control T505A Rep5	Abundances Normalized F27 129 Sample Chk1i Eu-Myc Rep3	Abundances Normalized F28 128 Sample Chk1i Eu-Myc Rep2	Abundances Normalized F29 127 Sample Chk1i Eu-Myc Rep1	Abundances Normalized F30 130 Sample Chk1i Eu-Myc Rep4	Abundances Normalized F31 131 Sample Chk1i Eu-Myc Rep5	Abundances Normalized F27 130 Sample Control cRel Rep3	Abundances Normalized F28 129 Sample Control cRel Rep2	Abundances Normalized F29 128 Sample Control cRel Rep1	Abundances Normalized F30 131 Sample Control cRel Rep4	Abundances Normalized F31 126 Sample Control cRel Rep5	Abundances Normalized F27 131 Sample Chk1i T505A Rep3	Abundances Normalized F28 130 Sample Chk1i T505A Rep2	Abundances Normalized F29 129 Sample Chk1i T505A Rep1	Abundances Normalized F30 126 Sample Chk1i T505A Rep4	Abundances Normalized F31 127 Sample Chk1i T505A Rep5	Abundances Normalized F27 126 Sample Chk1i cRel Rep3	Abundances Normalized F28 131 Sample Chk1i cRel Rep2	Abundances Normalized F29 130 Sample Chk1i cRel Rep1	Abundances Normalized F30 127 Sample Chk1i cRel Rep4	Abundances Normalized F31 128 Sample Chk1i cRel Rep5	Abundances Normalized F27 127 Sample Control Eu-Myc Rep3	Abundances Normalized F28 126 Sample Control Eu-Myc Rep2	Abundances Normalized F29 131 Sample Control Eu-Myc Rep1	Abundances Normalized F30 128 Sample Control Eu-Myc Rep4	Abundances Normalized F31 129 Sample Control Eu-Myc Rep5	Modifications	WT_Control/WT_Chk1i_Rep1	WT_Control/WT_Chk1i_Rep2	WT_Control/WT_Chk1i_Rep3	WT_Control/WT_Chk1i_Rep4	WT_Control/WT_Chk1i_Rep5	WT_Control/WT_Chk1i_Average
1	1	3444	E9PVX6	Proliferation marker protein Ki-67 OS=Mus musculus OX=10090 GN=Mki67 PE=1 SV=1	Mki67	350.7	9.72	70596	62	3654	202	0	60554.2	82229.6	82767.5	69897.1	84381.8	58988.4	75182.3	71627.8	108040	101698	60832.2	73754.7	60465	76120.9	35042.2	59469.1	49646.8	79970.6	61094.5	92004.9	14494.9	82323.8	6978.6	64538.4	32768.1	114975	93314.1	98408.7	124159	114672	Acetyl [N-Term]	1.37389	1.24117	1.94911	1.1492	1.12757	1.36819
2	2	3614	Q8VDD5	Myosin-9 OS=Mus musculus OX=10090 GN=Myh9 PE=1 SV=4	Myh9	226.2	5.66	67940	59	3581	144	24	37126.7	32305.1	34216.1	36874.3	37272.2	68815.5	57880.5	67523.4	58656.1	68340.3	103499	90253.1	91743.9	54950.7	140363	48590.7	29568.4	48684.8	34306	38982.5	177384	92661.7	160482	61425.7	148828	61322.4	50538.4	38308.3	46017.6	60713.9	Acetyl [N-Term]	0.567334	0.873151	0.891113	0.784532	0.888406	0.800907
3	3	1168	F6ZDS4	Nucleoprotein TPR OS=Mus musculus OX=10090 GN=Tpr PE=1 SV=1	Tpr	273.8	5.03	59285	59	3206	171	0	75394.9	61609.4	55222.9	70885.8	69315.3	85331.6	69349.1	71363.5	89153.6	81849.3	66784.2	70638.4	66124.3	84607.9	48607.5	73648.4	42886	57560	53048.8	55976.9	52394.3	62873.2	17513.2	79058.4	52100.9	72571.1	67861.4	69708.3	82393.7	86940.6		0.976806	0.978548	0.85046	0.924177	1.0622	0.958439
4	4	4465	P26039	Talin-1 OS=Mus musculus OX=10090 GN=Tln1 PE=1 SV=2	Tln1	269.7	6.18	41347	68	1834	128	0	7568.5	6384.1	12993.8	1867	8224	14377.4	9168.3	21705.6	3190.4	13949.7	36391.6	20134.5	31593.3	3140.1	63258.8	8801.9	5357.1	16231.9	1820.1	7245.2	36678.4	20304.6	94094.8	5268	62591.6	10746.6	7606.7	11944.1	2737.5	12566.2		0.550277	0.829674	0.747465	0.858043	0.900822	0.777256
5	5	3699	Q9WTQ5	A-kinase anchor protein 12 OS=Mus musculus OX=10090 GN=Akap12 PE=1 SV=1	Akap12	180.6	4.44	52802	71	2323	101	0	41988.6	43249.8	42011.9	46770.2	38104.1	51517.2	55883.1	38964.3	48436.8	50674	34211.2	43387	32481.4	55495.5	28754.3	40197.9	50923.2	41751.7	42702	48401	29111.9	39537.6	9172.8	36387	29576	49253	58427.4	52084.8	48733.3	50639.5		1.33673	1.04553	0.95605	1.00612	0.999319	1.06875
6	6	2283	P16546	Spectrin alpha chain, non-erythrocytic 1 OS=Mus musculus OX=10090 GN=Sptan1 PE=1 SV=4	Sptan1	284.4	5.33	35539	68	1694	147	1	15002.3	6204.6	11048.2	4858.6	11541.8	27168.4	9847.6	20413	9235.8	21249.9	44420.3	19629	26701.4	7819.3	53152.9	15855.8	6649	12994.6	5420.1	11423.8	50978.6	15962.3	29199.9	10003.1	48673.9	19609	9230.2	13633.4	7992.7	20189.3		0.667878	0.937305	0.721758	0.865404	0.950089	0.828487
7	7	4122	Q8BTM8	Filamin-A OS=Mus musculus OX=10090 GN=Flna PE=1 SV=5	Flna	281	6.04	38022	62	1732	123	6	17701.6	13127.2	18526.4	8260.3	15371.6	33448.1	24720.6	36262	20740.1	34669.8	48826.8	38060.5	46596.2	15681.4	79694.2	20418.1	12740.4	23054.5	9952.8	13174.3	78975	40926	96769.2	25935.6	78358.3	23982.9	18610.2	19184.9	16742	28832.2		0.529063	0.752822	0.717018	0.807229	0.831623	0.727551
8	8	3420	Q99PL5	Ribosome-binding protein 1 OS=Mus musculus OX=10090 GN=Rrbp1 PE=1 SV=2	Rrbp1	172.8	9.33	47422	81	2752	144	0	71232.5	52857.6	52252	71005.9	84486.3	97138.1	72855.5	62540	98277	97676.8	65287.6	70896.5	59315	110095	53669.2	63939.4	53465.4	61466.4	88100.5	68357	82366.8	73912.9	26245.2	88176.4	63389.5	95503.4	70382.9	62742.4	84706.5	88696.7		1.00324	0.966062	0.983171	0.861916	0.908063	0.94449
9	9	2526	E9Q6J5	Biorientation of chromosomes in cell division protein 1-like 1 OS=Mus musculus OX=10090 GN=Bod1l PE=1 SV=1	Bod1l	327.3	5.33	31664	47	1470	136	2	30086.5	23010.1	18657.7	24816.2	33605.7	23747.4	21112.9	13276.8	18404.6	24273.3	18464.5	16718.3	11927.9	18854.4	12283.5	27051.3	24552.1	17320.4	24864.1	31702.4	14036	15447	3634	15294.8	12937	26338.8	23761.8	17656.6	20669.8	26036.5		1.32988	1.12546	1.10912	1.12308	1.07264	1.15204
10	10	222	P27546	Microtubule-associated protein 4 OS=Mus musculus OX=10090 GN=Map4 PE=1 SV=3	Map4	117.4	4.98	37817	74	2172	73	0	57938.8	51803.3	58634.3	51131.7	56397.3	50631.6	54312.3	49853	49240.1	58065.4	41950.4	46350.2	44123.8	57321.7	34160.9	50885.4	55456.5	59064	56371.4	65202	48324	48370.6	15595.9	47122.1	36266.3	49421.3	54587.6	55936.1	47858.1	54720	Acetyl [N-Term]	1.12202	1.00507	0.976096	0.971933	0.942386	1.0035
11	11	3500	Q3TLH4	Protein PRRC2C OS=Mus musculus OX=10090 GN=Prrc2c PE=1 SV=3	Prrc2c	310.7	9.1	31412	45	1756	121	2	46135.2	41324.6	40399.7	54775.5	53405.8	39881.7	41496.1	33801.8	48724.3	45852.9	29119	32806.4	28838.7	46990.3	20389.8	42638.1	46769.1	40118.1	61672.6	54282.8	18637.8	30439.8	7013.8	38160.5	21349.9	43869	42956.1	43317.6	49704.7	47086		1.28152	1.03518	1.09998	1.02012	1.02689	1.09274
12	12	4505	P08032	Spectrin alpha chain, erythrocytic 1 OS=Mus musculus OX=10090 GN=Spta1 PE=1 SV=3	Spta1	279.7	5.03	20743	61	1076	123	0	7058.4	3198.1	5362.7	2599.1	7202	11103	3414.8	9854.7	2613.7	8511.1	13954.1	7178.6	13501.8	2055.3	25768.3	7215.4	2519.8	5372.2	1563.3	5642.4	15797.2	5171.5	9833.3	2474.3	19366.5	10031.4	4207.9	7280.6	3246.5	10862.9		0.738795	1.23225	0.903486	1.24211	1.27632	1.07859
13	13	1346	Q8BL66	Early endosome antigen 1 OS=Mus musculus OX=10090 GN=Eea1 PE=1 SV=2	Eea1	160.8	5.77	29267	72	1594	116	0	31762.8	30579.6	22205.3	37621.4	34292.3	28507.7	32330.1	19973.1	32899	31250	22406.7	26755.4	17607.1	36575.6	17672.1	29884	33965.7	21474	38227.3	35551.2	26355.5	26202.4	7492.8	30051.1	20001.9	30242.3	34191	25050.1	33809.1	30158.4		1.25419	1.05756	1.06085	1.02766	0.965069	1.07307
14	14	1438	E9Q7G0	Nuclear mitotic apparatus protein 1 OS=Mus musculus OX=10090 GN=Numa1 PE=1 SV=1	Numa1	235.5	5.87	21262	55	1073	109	0	7715.4	8599.6	6714	4561.5	8555.8	11029.2	12363.4	10038.2	7683.1	11852	11086.6	13463.2	10838.1	4906.2	9929.4	9149.9	9132.5	9122.4	4359.7	8354.7	13006.9	13264.4	8075.6	5698.8	11270.2	10853.8	11751.6	7647	6845.3	10375.5		0.76179	0.950515	0.984097	0.890955	0.875422	0.892556
15	15	3319	O08638	Myosin-11 OS=Mus musculus OX=10090 GN=Myh11 PE=1 SV=1	Myh11	226.9	5.45	22437	50	1247	101	5	5607.4	4823.9	4551.2	3625.6	4550.8	9211.7	7374.8	8021	4714.3	9838.4	11351.8	12052.1	9658.8	5542.2	20800.5	6346.9	4039.7	5644.8	3324.6	4676.2	25167.9	11051.4	22909	5890.5	18286.3	8947.1	8489.1	5283.8	3880.9	7756.8		0.658746	1.1511	0.971276	0.823219	0.788421	0.878551
16	16	442	Q922J3	CAP-Gly domain-containing linker protein 1 OS=Mus musculus OX=10090 GN=Clip1 PE=1 SV=1	Clip1	155.7	5.24	23341	63	1287	100	9	21349.6	22222.5	17945.2	23040.2	25592.5	19319.7	20693.4	14881	21120	23481.8	17461.1	19950.7	15692.6	22145	13062.3	21847.2	22923.4	17878.6	22979.7	23595.5	13194.9	18333.7	6264.4	20012.1	14011.4	18347.5	21693.1	18066.3	21174.9	23725.8		1.21405	1.04831	0.949678	1.0026	1.01039	1.04501
17	17	2308	Q3UZ39	Leucine-rich repeat flightless-interacting protein 1 OS=Mus musculus OX=10090 GN=Lrrfip1 PE=1 SV=2	Lrrfip1	79.2	4.82	25789	74	1160	54	2	31507.3	23864.8	23293.1	21542.8	24681.5	34769.2	28558.8	22859.5	24616.3	28336.3	24833.7	24371.9	19205.6	28874.3	17355	27762.3	29889.3	23853.6	24008.9	26141.9	28624.2	22005.7	6745.8	23643.3	19118.3	33296.6	28859.1	28807.8	24141.8	29476.6	Acetyl [N-Term]	1.26021	1.01052	0.957646	0.980724	1.04024	1.04987
18	18	1552	Q62261	Spectrin beta chain, non-erythrocytic 1 OS=Mus musculus OX=10090 GN=Sptbn1 PE=1 SV=2	Sptbn1	274.1	5.58	12116	46	663	91	3	4803.1	2036.3	3036.5	989.4	3690	7446.3	3080.5	4791.3	1728.7	6246.1	8832.3	4262.7	6139.2	1250.6	11194.2	5311.5	2251.1	3883.7	1198	3360.1	12379.9	3791.5	8494.1	1574	11455.5	5645.7	2976.3	3474.5	1588.3	5937.2		0.725169	0.966174	0.758189	0.918783	0.950545	0.863772
19	19	283	Q9Z315	U4/U6.U5 tri-snRNP-associated protein 1 OS=Mus musculus OX=10090 GN=Sart1 PE=1 SV=1	Sart1	90.8	5.82	23258	64	1027	57	0	20775	19823.8	16357.3	15461.8	16036.5	16782.4	18751.1	13835.2	15066	14812.9	13834.1	16024.6	13024.5	15396.8	8727.2	19812.2	19696.9	15955.2	15249.8	15611.1	10086.6	14774.1	3043.2	12820.2	9130.7	18265.2	19848.6	16308.7	16493.5	16609.3		1.17878	1.05853	1.08835	1.09475	1.12127	1.10834
20	20	3680	P07724	Serum albumin OS=Mus musculus OX=10090 GN=Alb PE=1 SV=3	Alb	68.6	6.07	35354	80	2190	53	0	23004.5	34931.1	34468.6	64667.7	29977	40561.3	29975.8	35008	41855	31901.8	71935.1	47654.9	58321.9	64562.2	149401	30120.9	23624.2	34455.7	72168.2	32058.3	129692	83215.1	160980	74775	130934	30860.4	27799.2	27595.3	42522.4	31121.8		0.788257	0.927388	0.760834	1.01595	0.97555	0.893595
21	21	2603	Q921I1	Serotransferrin OS=Mus musculus OX=10090 GN=Tf PE=1 SV=1	Tf	76.7	7.18	36925	67	2245	59	0	119440	92949.4	98746.1	118902	116126	59972	37614.5	45591.2	70850.5	41913.3	28162.5	23384.3	33518.7	50331.7	28907.7	95764.4	103070	49122.8	92679.5	91446.9	35644.6	35726	18422.6	46504	22349.9	101484	46008.3	72841.2	99789.7	41615		1.5977	1.22315	1.69219	1.40845	0.992883	1.38288
22	22	4547	P20152	Vimentin OS=Mus musculus OX=10090 GN=Vim PE=1 SV=3	Vim	53.7	5.12	87221	80	5245	54	6	119072	123574	83173.3	86414.5	68917.8	112750	142598	121815	154295	120989	71532	110288	101296	97797.4	55992.6	121807	117976	97474.1	96032.8	82700.5	75979.5	97369.2	37910.9	117922	59562.2	88420.1	124443	109683	144890	118252		0.900402	0.872686	0.784213	0.939046	0.977375	0.894744
23	23	4427	Q9QXS1	Plectin OS=Mus musculus OX=10090 GN=Plec PE=1 SV=3	Plec	533.9	5.96	12324	23	731	103	1	4382.8	3629.8	3131.9	3586.3	5126.5	5764	6536.5	4798.8	4807.2	7882.1	4945.4	6506.1	4793.5	3545.3	6107.1	4530.9	4551	3957	3958.3	5460.4	5839.5	6971.7	3880.2	3848.8	6686.2	5168.5	5862.9	3774.4	4637.2	6898.8		0.78653	0.896948	0.896686	0.964636	0.875249	0.88401
24	24	1974	Q6P5H2	Nestin OS=Mus musculus OX=10090 GN=Nes PE=1 SV=1	Nes	207	4.34	12591	47	742	75	0	10911.3	12552	9069.7	6776.6	6777.3	5350	9414	4726.6	3402.1	3747.3	6192.3	9749.4	5948.8	5995.8	2878.3	9892.5	17705.8	11797.8	7482.9	7435.7	2930.4	9235.2	2001.7	6333.4	3263.6	5016.7	9895.4	4962.8	3353.8	3559.7		1.04997	1.05114	0.937701	0.985803	0.949937	0.99491
25	25	3345	Q6PGL7	WASH complex subunit 2 OS=Mus musculus OX=10090 GN=Washc2 PE=1 SV=1	Washc2	145.2	4.77	14325	56	690	53	0	5124.4	7979.6	6464.5	6453.9	3929.9	5621.8	8077.9	7668.5	9287.6	5080.3	6513.6	10762.3	7782.2	11517.2	3789.5	4801.8	8011.1	7180.3	7503.9	4000	7515.8	9386.9	2916.6	10556.2	4392.3	5821.2	8910.3	7833.9	8254.8	4510.7		1.02157	1.10305	1.03547	0.888798	0.887881	0.987353
26	26	3012	P51125	Calpastatin OS=Mus musculus OX=10090 GN=Cast PE=1 SV=2	Cast	84.9	5.52	23404	80	1280	56	0	33761.2	23123.9	24342.6	40298.3	49580.9	29147.5	25243.4	20926.4	31162.6	34636.4	24947.9	24351.8	17461.4	36683.9	23370.7	29838.4	25707	23067.2	40788.2	46582.3	36170.3	22342.5	7400.3	30564.3	26113.2	37078.7	28299.7	26986.6	32617.7	35443.6		1.2896	1.12107	1.27211	1.04669	1.0233	1.15055
27	27	315	Q9JIX8	Apoptotic chromatin condensation inducer in the nucleus OS=Mus musculus OX=10090 GN=Acin1 PE=1 SV=3	Acin1	150.6	5.91	23175	52	1020	61	0	22353.6	19251.7	15150.2	25719.2	18973.6	24547.8	23951.4	18819.2	29712.1	20492.3	21673.7	24824.5	19341.4	30541.9	15025.6	21500.3	20082.1	17108.9	26153.8	18786	22017.5	22442.4	7974.7	27679.1	15920.8	24441.8	23516.2	16986.7	28988.2	20415.3		0.902626	0.98183	0.995682	0.975636	0.996242	0.970403
28	28	2777	P15508	Spectrin beta chain, erythrocytic OS=Mus musculus OX=10090 GN=Sptb PE=1 SV=4	Sptb	245.1	5.33	7934	47	479	82	0	2249.8	1439.6	2618.1	1882.2	2701.6	2849.8	1683.2	3326.6	1733.2	2560.8	2646.9	2095.3	3419.1	1334.7	4036.3	2184.2	1382	2653	1363.6	1910.2	3034.7	1917.5	3480.5	1268.7	3324.1	3478.9	2070.2	3428.9	2226.9	3076.2		1.03075	1.22992	1.22075	1.28485	1.20127	1.19351
29	29	1238	Q8BTI8	Serine/arginine repetitive matrix protein 2 OS=Mus musculus OX=10090 GN=Srrm2 PE=1 SV=3	Srrm2	294.7	12.03	14532	29	802	62	0	16933.2	12734.5	12364.7	11329.2	17196.1	20583.2	15791.1	14310.7	15489.2	19783.1	16397.5	15489.3	14065.6	14419.6	12134.8	18016.1	12940.8	14251.8	11642.7	15205.9	10029.3	14967.3	4584.2	13228.2	13043.3	18732.5	15247.1	13765.9	14985.2	20936.1		0.961931	0.96555	0.910087	0.967461	1.05828	0.972662
30	30	1819	Q99MD9	Nuclear autoantigenic sperm protein OS=Mus musculus OX=10090 GN=Nasp PE=1 SV=2	Nasp	83.9	4.37	21246	68	1104	48	0	18964.2	16753.6	12206.5	13280.2	13609.4	23622.7	17534.5	19192.9	22924.2	20671.8	20712.5	18127.2	20040.5	22618	13979.1	22545.2	8032.5	15128.9	8745.4	10069.2	10178.7	17619.5	2967.5	24140	12571.2	16051.9	16737.3	16175.7	22972.9	24659.1	Acetyl [N-Term]	0.842796	0.954535	0.679512	1.00212	1.19289	0.934371
31	31	3108	O08784	Treacle protein OS=Mus musculus OX=10090 GN=Tcof1 PE=1 SV=1	Tcof1	134.9	9.35	21276	52	1074	65	0	38471.9	41138.4	40933.7	36723.7	24967.6	49363	56989.2	48378.1	58959.7	37359	31743.2	40870.9	35869.3	40836	14286.5	37158.5	44026.6	42766.6	41697.7	27357.6	15665.7	38760.6	8106.9	43562.7	13810.7	43891.2	53865.5	51653.6	60591.5	35941.7		1.06771	0.945188	0.889152	1.02768	0.962063	0.978357
32	32	1229	Q60864	Stress-induced-phosphoprotein 1 OS=Mus musculus OX=10090 GN=Stip1 PE=1 SV=1	Stip1	62.5	6.8	20126	74	1471	60	0	49838.6	45580.4	38160.7	33325.5	42230.2	61877.4	54189.5	61955.4	50014.6	61698.7	60890.2	59611.5	74178.8	52230.5	57055.8	55644.4	34874.2	45813.5	37388.4	41711.9	53458.8	53375.2	23191.8	55136.6	59405.7	49690.4	47619.7	45962.5	44984.1	63420.4	Acetyl [N-Term]	0.741864	0.878762	0.803046	0.899419	1.0279	0.870199
33	33	3908	Q9QXZ0	Microtubule-actin cross-linking factor 1 OS=Mus musculus OX=10090 GN=Macf1 PE=1 SV=2	Macf1	831.4	5.43	6480	16	467	87	0	2086.6	1034.2	1084.2	478.4	1532.4	2946	1469.3	1917.2	1034.8	2531.7	3152.6	2132.1	2097.1	722.1	2590.5	2069.4	859.8	1333.6	530.7	1490.3	3671.6	1982.6	1526.2	926.9	2793	2309.8	1264.5	1304.8	975.4	2282.9		0.680576	0.860614	0.784046	0.942598	0.901726	0.833912
34	34	2996	Q80X50	Ubiquitin-associated protein 2-like OS=Mus musculus OX=10090 GN=Ubap2l PE=1 SV=1	Ubap2l	116.7	7.11	24711	45	1156	39	0	29244.3	25222.9	27449.9	37533.9	32785.6	22636.3	23568.4	20621.1	29634.7	25300	18020.5	20644.3	19298.7	28924.8	11148.7	25986.7	27818	25327	39157.4	33782	9417	18536.6	3189.4	24575.8	11706.8	24879.2	25477.5	24550.1	30932.2	27800.6		1.19053	1.081	1.09908	1.04378	1.09884	1.10265
35	35	4414	Q7TSC1	Protein PRRC2A OS=Mus musculus OX=10090 GN=Prrc2a PE=1 SV=1	Prrc2a	229.1	9.39	14023	42	810	74	0	11356.5	12719.4	10301.3	10753.3	11496.1	9059.4	11666	7690.8	8282.1	8710.2	7724.1	10227.4	7385.1	9230.9	5038.9	11028.2	13590	10873.8	11177.5	11715.6	5305.2	10247.6	2601.3	7105.8	5162.5	11194.6	12338.9	10593.9	8905.1	8932.3		1.37748	1.05768	1.23569	1.07522	1.0255	1.15431
36	36	4105	Q8VD04	GRIP1-associated protein 1 OS=Mus musculus OX=10090 GN=Gripap1 PE=1 SV=1	Gripap1	92.7	5.25	15453	72	711	58	1	7149.2	7666.4	5396	8048.9	6327.3	7369.5	8125.5	5259.2	7614.7	6316.3	6568.3	8489.2	5193.3	9811.9	5717.2	6649.1	7503.2	5606	7346	5641.1	8257.1	7512	2658.4	8316.1	6417	7081.3	8292.6	6121.6	8014.6	6341.5	Acetyl [N-Term]	1.16398	1.02056	0.960893	1.05252	1.00399	1.04039
37	37	162	P49710	Hematopoietic lineage cell-specific protein OS=Mus musculus OX=10090 GN=Hcls1 PE=1 SV=2	Hcls1	54.2	4.84	28905	59	1683	43	0	48021.4	42984.8	42361.3	55411.6	39840.6	49369.3	51579.5	45073.7	63184.6	46613.3	43826.4	53577	41137.8	78149.3	35245.4	39084.3	52106.7	43795.4	63764.9	43401.3	60843.1	43209.4	16047.3	66211.1	42504.8	43238.9	50703.6	44167.7	59205.8	47300.3		0.9799	0.983018	0.875826	0.937029	1.01474	0.958102
38	38	2179	P11499	Heat shock protein HSP 90-beta OS=Mus musculus OX=10090 GN=Hsp90ab1 PE=1 SV=3	Hsp90ab1	83.2	5.03	26835	63	1174	47	20	8557.6	11837.4	14221.1	8462.9	4664.7	24340.3	13793.3	25961.4	12018.8	12832	48560.9	31500.8	40207.8	10203.1	62444.8	14436.1	4209.6	17010.2	5549.6	4957.2	36124.2	41118.9	54401	25981.5	56719.8	14083	8256.8	9911.2	7722.2	10139.5		0.381767	0.598609	0.578588	0.64251	0.790173	0.598329
39	39	112	P09103	Protein disulfide-isomerase OS=Mus musculus OX=10090 GN=P4hb PE=1 SV=2	P4hb	57	4.88	28488	80	1761	49	0	34048.8	35452	34778.2	19952.6	22742.4	74010.7	42835.7	74679.7	54145.3	56402.7	67650.6	81997.2	83328.3	81194.6	66350	32462.5	15263	39729	20752.2	14134.3	68092.6	93473.9	27083.8	127906	73764.6	40617.8	26490.9	29628.6	36657.3	53965.7		0.396742	0.61843	0.54881	0.677017	0.956793	0.639559
40	40	4101	Q61595	Kinectin OS=Mus musculus OX=10090 GN=Ktn1 PE=1 SV=1	Ktn1	152.5	5.86	8895	51	598	71	1	7409.5	5809.6	4404.7	4118.6	7518	8254.9	8280.6	5892.4	5929	9189.3	8510.8	8032.4	5859.2	5194.8	6263.8	7846.3	5739.5	4762.3	4075.5	6882.9	5451.3	7655.7	2692.3	4397	6281.9	7637.7	7374.8	5453.2	5507.4	9163.8		0.925463	0.890612	0.925232	0.928892	0.997225	0.933485
41	41	2198	P57780	Alpha-actinin-4 OS=Mus musculus OX=10090 GN=Actn4 PE=1 SV=1	Actn4	104.9	5.41	11475	62	599	52	14	2909.2	2271	4239.7	1277.9	1946.5	6605.3	3276.2	7405.7	2400.7	4633.2	12069.5	7142.1	10154.6	1841.4	23730.3	4332.3	1345	5529.2	1112.5	2130.8	24968.6	7895	47479.7	3503.6	24964.6	4529.9	2404.6	4223.8	1727	3978.4		0.570344	0.73396	0.685798	0.719374	0.858672	0.71363
42	42	1883	P09405	Nucleolin OS=Mus musculus OX=10090 GN=Ncl PE=1 SV=2	Ncl	76.7	4.75	28873	61	1738	64	0	59019.8	60718.7	52376.3	46653.6	33500.9	91182.2	68338.5	97374.1	104191	63369.8	86177	61968.5	75089.3	62362.8	38470.1	59692.7	46684.6	55226.4	48181.1	38432.8	20239.8	70908.3	17646.8	78017.6	34610.5	74384.1	71114	81205.3	91047.7	62451.3		0.833952	1.04061	0.815774	0.873855	0.985506	0.90994
43	43	1694	Q61233	Plastin-2 OS=Mus musculus OX=10090 GN=Lcp1 PE=1 SV=4	Lcp1	70.1	5.33	23333	70	1037	38	0	8520.5	6074.3	10502.9	4746.3	7804.4	12973.7	7871.8	10652.7	4473.5	11174.7	25409.5	10561.9	13439.8	7301.2	47744.9	10453.6	6460.8	13434.6	7399.9	8507.7	58413.1	12842.7	72266.4	7778.8	50017.1	10891.6	5918.4	8641.8	4179.3	9015		0.811231	0.751848	0.839514	0.934235	0.806733	0.828712
44	44	4682	Q80YR5	Scaffold attachment factor B2 OS=Mus musculus OX=10090 GN=Safb2 PE=1 SV=2	Safb2	111.8	6.38	13771	51	714	53	14	19057.3	15731.6	15013.1	9107.5	16194.2	18912.6	17335.9	16366.9	9738	15142.6	16029.3	14185.2	15786	9890.5	9083.1	19876.6	14681.8	16333.4	10161.2	15871.9	13417.5	14297.4	4854.1	8920.4	9511.4	18667	17410.6	16306.4	8819.8	15389.3	Acetyl [N-Term]	0.996304	1.00431	0.987014	0.90571	1.01629	0.981926
45	45	3309	Q9QX47	Protein SON OS=Mus musculus OX=10090 GN=Son PE=1 SV=2	Son	265.5	5.6	15326	26	679	47	1	8339.8	7004.7	6984.9	5770.7	10573.2	8624.6	9315.3	6694.2	7322.6	10090.7	7296.4	8356.6	6655.6	5361	6506.4	8177.3	8822.5	8038.9	6827.9	10080.9	5915.1	7741.9	2532	5742.2	6720.3	9096.8	9354.8	7653.7	7534.8	10682.2	Acetyl [N-Term]	1.14333	1.00424	1.05475	1.02898	1.05862	1.05798
46	46	1052	D3YXK2	Scaffold attachment factor B1 OS=Mus musculus OX=10090 GN=Safb PE=1 SV=2	Safb	105	5.35	13818	41	710	50	0	9128.3	7841.9	6592.4	7162.4	7636.1	10177.2	10595	12326.5	9389	8479.7	7768.5	10062.1	12200.2	7139.2	4455.7	10283	6615.8	8313.7	8042.5	8028.6	6751.3	10428.2	3550.3	8255.5	5000.6	8838.7	9408.7	8662.1	7645.2	8226.2	Acetyl [N-Term]	0.702722	0.888032	0.868481	0.814272	0.970105	0.848722
47	47	2982	P63017	Heat shock cognate 71 kDa protein OS=Mus musculus OX=10090 GN=Hspa8 PE=1 SV=1	Hspa8	70.8	5.52	19164	65	1150	43	5	13549.4	20190.5	24077.3	12035.5	12855.6	24094.9	24101.4	29855.8	15789	22490.1	36680.4	31810.1	34718.1	12094.8	48743.1	19278.4	15125.4	25895.3	10466.7	13553.8	31527.5	42675.5	70985	17461	47038.2	20366	19154.2	21411.6	11401.3	18628.9		0.717167	0.794734	0.845241	0.722104	0.828316	0.781512
48	48	2281	P58871	182 kDa tankyrase-1-binding protein OS=Mus musculus OX=10090 GN=Tnks1bp1 PE=1 SV=2	Tnks1bp1	181.7	4.88	10905	47	461	55	0	1995.9	1637.3	1089.9	2210.8	1919.6	1982.7	2072.5	1098.6	2531.2	2168.4	1669	2018.1	958.7	2965.4	1409.5	1726.1	1756.6	1147.7	2347.1	2062.7	2594.8	1810.3	697	2432.2	1838.8	2048.9	2047.8	1307.3	2447.8	1938.5		1.18997	0.988082	1.03339	0.967051	0.893977	1.01449
49	49	70	P20029	Endoplasmic reticulum chaperone BiP OS=Mus musculus OX=10090 GN=Hspa5 PE=1 SV=3	Hspa5	72.4	5.16	21990	57	1186	44	3	13426.9	10914.1	11325.9	11500.1	8001.1	35330.8	14914.5	28159.3	22997.6	22284.4	49074	34471.8	40282.1	30276.5	66429.4	14534.5	6234.3	12950.9	10397.2	6623.1	68172.4	32443	47374.4	43455.3	74242.9	20813.5	10573.6	13153.7	15536.7	20678.2		0.467117	0.708948	0.589104	0.675579	0.927923	0.673734
50	50	494	Q3U0V1	Far upstream element-binding protein 2 OS=Mus musculus OX=10090 GN=Khsrp PE=1 SV=2	Khsrp	76.7	7.33	22892	57	985	40	5	39104.3	30473.8	36207.6	50415.3	36815.1	26911	31740.7	26191.1	30024.2	26733.9	25264.7	20783.5	25705.1	28545.6	15638.1	39587.5	34469.8	35130.2	57047.7	44950.1	16651.4	20664.4	9944.8	29238.5	15561.4	30624	27840.1	28677.9	34790.3	27772	Acetyl [N-Term]	1.09495	0.87711	1.13797	1.15874	1.03883	1.06152
51	51	217	Q9JKF1	Ras GTPase-activating-like protein IQGAP1 OS=Mus musculus OX=10090 GN=Iqgap1 PE=1 SV=2	Iqgap1	188.6	6.48	6326	45	374	58	0	222.7	295.3	2142.8		259.7	474.2	371.5	2570.5		489.5	767.1	598.6	2940.2		1677	310	233.6	2398.5		351.8	1030.7	714.2	14869.1		1771.5	355.6	319.6	1940.8		406.6	Acetyl [N-Term]	0.755028	0.860296	0.749895	NA	0.830644	0.798966
52	52	1745	Q9DBR7	Protein phosphatase 1 regulatory subunit 12A OS=Mus musculus OX=10090 GN=Ppp1r12a PE=1 SV=2	Ppp1r12a	114.9	5.49	10492	53	630	56	1	7346.6	8147	6040.4	3701.6	5605.8	11240.7	10652.8	9027.3	6522	8520.3	12345.1	15968.7	9679.7	8366	9102.5	7636.3	6296.1	7036	4148.4	5430.8	13445.1	12646.9	4619	7894.6	9350.1	8948.9	10190.5	7696.9	6058.5	8322.3		0.852625	0.956603	0.796116	0.928933	0.976761	0.902208
53	53	4177	Q9CY58	Plasminogen activator inhibitor 1 RNA-binding protein OS=Mus musculus OX=10090 GN=Serbp1 PE=1 SV=2	Serbp1	44.7	8.54	27419	72	1854	36	0	83115.2	95855.5	91196.8	84201.4	88585.7	56151	81429.6	62411.8	61269.8	60482.8	44933.1	56013.2	54003.3	57146.6	26237.4	79550.3	102239	83615.5	91074.6	92880.1	20388	58114	8850	44847.6	25164.8	68746.1	87443.7	76774.7	70440.1	66946.4		1.23013	1.07386	1.22431	1.14967	1.10687	1.15697
54	54	2301	P60710	Actin, cytoplasmic 1 OS=Mus musculus OX=10090 GN=Actb PE=1 SV=1	Actb	41.7	5.48	54029	72	2463	22	26	13546.2	24355.1	19154.8	23979.7	9380.8	23896.5	26833.9	25057.8	32150.9	17558.7	49222.3	51095.6	30403.2	29442.5	89775.8	19827	14862	23496.8	24384.3	12098.4	95294.9	62835.7	196888	48209.1	95378.4	21464.5	18705.6	14976.1	20487.2	14506.2	Acetyl [N-Term]	0.597662	0.697088	0.898228	0.63722	0.826155	0.731271
55	55	4141	Q7TPR4	Alpha-actinin-1 OS=Mus musculus OX=10090 GN=Actn1 PE=1 SV=1	Actn1	103	5.38	9153	59	504	49	3	807.4	219.9	1736.7	115.9	1231.2	1624.3	294.9	2625.6	226.1	1764.6	3189.1	601.8	3369.5	157.7	7100.1	1052.9	120.5	2345.1	108.8	1148.6	7645.6	717.2	22722.1	309.7	7751.9	1460.5	191.3	1847.1	140	1413.6		0.703496	0.648694	0.899157	0.619195	0.801088	0.734326
56	56	82	Q64727	Vinculin OS=Mus musculus OX=10090 GN=Vcl PE=1 SV=4	Vcl	116.6	6	9694	60	490	57	0	1659.2	1003.2	4167.6	263.1	2482	2917.7	1284.7	4751.6	288.1	3430	10516.6	2691.7	6099.3	319.9	26140	1976.2	851.7	4111.3	275.1	2553.7	10114.7	2899.1	30100.2	409.6	19931.7	2403.8	934.2	4632.1	216.4	2873.4		0.974851	0.727174	0.823868	0.751128	0.837726	0.822949
57	57	4108	P63260	Actin, cytoplasmic 2 OS=Mus musculus OX=10090 GN=Actg1 PE=1 SV=1	Actg1	41.8	5.48	49167	72	2309	21	0	17.1		62.9		13.8	15.7		66.1		23.1	24.8		90.1		66.9	19.5		82.6		29.9	53		264.8		81.9	19.1		40		26.1	Acetyl [N-Term]	0.605144	NA	1.21656	NA	1.12987	0.983858
58	58	1652	E9Q394	A-kinase anchor protein 13 OS=Mus musculus OX=10090 GN=Akap13 PE=1 SV=1	Akap13	303.8	5.38	6510	32	409	52	0	2098.5	2017.5	1297.7	2392.3	2266.8	2528.5	2907.9	1465.2	2276.2	2463.4	2191.5	3498.3	1443.6	2939.4	2105.1	1909.7	2232.5	1360.2	2256.9	2096.3	3160	2734.7	661	2658.8	2317.1	2627.7	2819.1	1679	2644.9	2427.3		1.14592	0.969462	1.03923	1.16198	0.985345	1.06039
59	59	261	P07901	Heat shock protein HSP 90-alpha OS=Mus musculus OX=10090 GN=Hsp90aa1 PE=1 SV=4	Hsp90aa1	84.7	5.01	19345	60	926	43	0	3405.4	2161.3	5115.5	2466.6	1597.2	10785.2	2354.8	9455	3387.4	4840.3	22850.8	4971.7	14093.4	2897.3	21120.7	6386.5	726.2	6500.8	1747.7	1620.5	15866.3	6828.2	17138.3	7504.7	17820.3	6098.3	1447	3769.5	2282	3795.5		0.398678	0.61449	0.565432	0.673673	0.784146	0.607284
60	60	403	Q9ERZ0	Hemogen OS=Mus musculus OX=10090 GN=Hemgn PE=1 SV=1	Hemgn	55	4.89	18396	70	1102	24	0	48052.6	50256.2	53624.3	86300.4	83797.7	17125.3	29916.5	23049.8	23988.1	21746.7	8056.2	19024.3	11535.1	12911.9	7591.1	40000.6	41971.8	29682.2	62734.4	77529.2	5796.9	22698.4	1916.6	11743.8	5119.8	59307.8	55344.8	51359.4	50528.8	30317.3		2.22819	1.84998	3.46317	2.10641	1.39411	2.20837
61	61	4514	P58771	Tropomyosin alpha-1 chain OS=Mus musculus OX=10090 GN=Tpm1 PE=1 SV=1	Tpm1	32.7	4.74	34308	74	2394	46	12	50454.4	61088.5	44546.4	48189.3	43283	50056.5	67430.9	45682.9	49359.7	50930.6	39107.9	55748.1	38225.8	56566.6	32883	50489.3	76441.3	45492.4	47277.2	48350.1	59002.2	60134.8	12724.6	49063.9	31729.6	47228.5	76260.1	47966.8	47596.7	43767.4		1.04999	1.13094	0.943504	0.964283	0.859354	0.989614
62	62	1125	Q02819	Nucleobindin-1 OS=Mus musculus OX=10090 GN=Nucb1 PE=1 SV=2	Nucb1	53.4	5.07	17015	76	851	42	0	22197.9	13034.2	18517	19222.2	20867.5	23920.3	15450	17962.6	19773.4	20288.6	20014.7	15718.4	15324.8	18266.2	11473.3	20740.4	12402.5	18885.6	20004.6	18861.5	18902.1	13322.2	4474.3	17585.5	12637.6	23750.9	15982.5	19046.8	19724.4	19588		1.06036	1.03447	0.992918	0.997522	0.965468	1.01015
63	63	2055	P19973	Lymphocyte-specific protein 1 OS=Mus musculus OX=10090 GN=Lsp1 PE=1 SV=2	Lsp1	36.7	4.82	36977	83	2020	29	0	37104.4	35934.9	39816.6	51663.8	35804	32435.7	35533.1	29438.8	48388.7	34323.4	29064.9	35157.5	27932.5	57995.3	21645.5	35376.9	50371.8	38814.8	54082.4	36370.9	28995.4	28313	8189.8	48382.7	24492.7	27610	35269.6	35276.5	48824.1	35747.5	Acetyl [N-Term]	1.1983	0.992584	0.851223	1.009	1.04149	1.01852
64	64	3095	Q61838	Pregnancy zone protein OS=Mus musculus OX=10090 GN=Pzp PE=1 SV=3	Pzp	165.7	6.68	11110	43	708	49	0	6707.3	5680	6802	5106.3	6119	12114.6	7519.1	8740.6	6296.4	8798.2	17353.1	13870.7	14820	7571.8	18550.9	7634.5	3057.5	5961.1	4451.2	5390.2	21172.4	16440.7	8397.4	11772.5	16188.1	8538.3	4246	4606	4423.8	8400.3		0.526966	0.564695	0.704794	0.702592	0.954775	0.690764
65	65	1171	O70318	Band 4.1-like protein 2 OS=Mus musculus OX=10090 GN=Epb41l2 PE=1 SV=2	Epb41l2	109.9	5.43	10634	58	484	53	2	4535.8	4415.5	4653	3093.2	4727.5	5213.1	4604.6	5313.4	3555.3	6133.2	5307.4	5404.7	5434.9	5003.5	5104	4587.9	4269.3	5347.1	3531.2	5209.3	7406.4	5289.2	5161.8	3786.1	5703.4	5577.1	4639.1	5302.1	3330.9	5414.6	Acetyl [N-Term]	0.997873	1.00749	1.06982	0.936883	0.882834	0.978981
66	66	428	Q91VX2	Ubiquitin-associated protein 2 OS=Mus musculus OX=10090 GN=Ubap2 PE=1 SV=1	Ubap2	117.9	7.72	16826	38	762	29	0	21839.3	18696.7	21947.8	25573.2	23864.6	14583.1	15183.4	13089.9	16974.1	15773.2	11465	12168.8	12075.6	16092.7	5548.2	19221.8	20474.4	18896.9	27260.8	23285.6	3666.4	11313.8	1754.3	12891.3	5282.1	17617.6	16881	17734.6	20214.4	17868		1.35483	1.11181	1.20808	1.1909	1.13281	1.19968
67	67	863	Q68FD5	Clathrin heavy chain 1 OS=Mus musculus OX=10090 GN=Cltc PE=1 SV=3	Cltc	191.4	5.69	5249	42	325	55	0	668.7	562.7	2502.2		411.1	939.9	683.6	3015		555.7	1409.7	872.3	3234		1934.6	921.9	448.9	2914.7		456.5	1873.6	1211.7	21808.7		2009.8	886.4	551.3	2129.2		466.3	Acetyl [N-Term]	0.706202	0.806466	0.943079	NA	0.839122	0.823717
68	68	4137	Q6IRU2	Tropomyosin alpha-4 chain OS=Mus musculus OX=10090 GN=Tpm4 PE=1 SV=3	Tpm4	28.5	4.68	40450	80	2445	37	0	39081.4	36287.5	41317	46825	41221.8	40312.9	42924.7	44049	56152.1	51309	34008	40810.1	37452.7	61610	36075.4	37294	44809.1	42201.1	50357.7	46276.5	53894.1	36604.3	14269.3	53360.6	38100	33762.7	43796.8	45488.8	54121.1	46885	Acetyl [N-Term]	1.03269	1.02032	0.837516	0.96383	0.913777	0.953625
69	69	2766	P14733	Lamin-B1 OS=Mus musculus OX=10090 GN=Lmnb1 PE=1 SV=3	Lmnb1	66.7	5.16	20096	62	1009	46	5	11553	11739.1	10982.5	7687.2	13261.3	20931.5	21701.8	23816.2	22702.6	29077.5	24582.9	23730.1	21501.9	9885	29663.1	15797	13084.6	16868	8593.9	16496.1	27817.1	24921.4	29500.6	19652.8	32241.4	15463.2	17176.3	17448.9	14211.3	23120.9	Acetyl [N-Term]	0.732648	0.791469	0.738753	0.625977	0.795147	0.736799
70	70	3449	Q61207	Prosaposin OS=Mus musculus OX=10090 GN=Psap PE=1 SV=2	Psap	61.4	5.19	41749	64	2878	31	0	30945.9	41181.1	35974	25092.3	51206	41779.2	57659.2	43200.6	35602.1	60383.2	31260.7	56074.4	37576.2	39978	42594.3	33001	44829.9	46109.6	30880.1	46341.9	45285.4	55206.3	14775.8	39078.9	55633.6	36520.8	50174.5	38759.9	29103.1	52877.8		0.897207	0.870191	0.874138	0.817455	0.875704	0.866939
71	71	3530	P31001	Desmin OS=Mus musculus OX=10090 GN=Des PE=1 SV=3	Des	53.5	5.27	26775	74	1384	45	0	11897.5	12146.6	9569.5	7257.7	7451.3	17762.8	18885.8	24334.9	21413.9	20241.8	15087.2	23032	20600	17946.3	16312.3	11743.8	8719.3	12487.2	7488.6	6771.5	24276.3	19036.2	16980.1	21996.9	18002	13528.6	18009.1	18084.7	16829.4	16926.5		0.743159	0.953579	0.761625	0.78591	0.836215	0.816098
72	72	3438	Q91VW5	Golgin subfamily A member 4 OS=Mus musculus OX=10090 GN=Golga4 PE=1 SV=2	Golga4	257.4	5.36	2541	37	255	71	0	676.2	1176.3	597	586.9	1125.2	816.4	1590.3	742.8	698.1	1263.3	784.7	1607.3	718.9	694.8	858.4	618.2	1182.9	694	563.8	1111.7	973.1	1408.5	748.5	637.8	1038.9	728.5	1512.4	683.1	635.4	1232.8		0.919628	0.951016	0.892332	0.910185	0.975857	0.929804
73	73	2384	Q9JL35	High mobility group nucleosome-binding domain-containing protein 5 OS=Mus musculus OX=10090 GN=Hmgn5 PE=1 SV=2	Hmgn5	45.3	4.37	7206	83	665	44	0	19704.1	23891.7	23698.4	14571.8	20619.9	15593.5	23080.7	13825.7	11345.4	14052.7	10456.7	12703.2	11201.7	11225.2	7244.8	23093.1	32562.2	21146.6	14738.9	19513.9	9138.9	15487	2463.5	8893.9	6164.1	16582.2	22588.2	22756.2	11539.1	15946.6		1.64593	0.978662	1.0634	1.01707	1.13477	1.16797
74	74	1899	P58774	Tropomyosin beta chain OS=Mus musculus OX=10090 GN=Tpm2 PE=1 SV=1	Tpm2	32.8	4.7	27340	73	1686	46	18	32553.3	41242.8	38375.2	46014	37240.1	35074.1	51245.9	44075.2	48395.4	51130.2	27479.2	46386.7	37005.2	59064.8	32797.6	31487.8	50789.6	37554.3	43420	42901.3	48390	46060.5	14130.2	48936.2	34098.8	33190.5	66892.8	44692.6	45441.8	41782.4		1.01401	1.30533	0.946297	0.938969	0.817177	1.00436
75	75	493	P11276	Fibronectin OS=Mus musculus OX=10090 GN=Fn1 PE=1 SV=4	Fn1	272.4	5.59	6340	30	409	48	0	2461.7	1485.4	2147.5	1145.6	3418.4	4092.8	1726	2408.5	1226.8	5038.3	4329.7	2589.1	2716.3	1401	6268.1	2834.5	1004.9	1669	1158.5	3110.1	5429.4	2490.7	2074.1	1753.2	6488.2	2799.8	1211.8	1462.4	927.5	4375.7		0.607183	0.702086	0.684079	0.756032	0.868487	0.723573
76	76	4002	P63038	60 kDa heat shock protein, mitochondrial OS=Mus musculus OX=10090 GN=Hspd1 PE=1 SV=1	Hspd1	60.9	6.18	11990	74	572	34	0	4967.7	6925.6	5828.9	5239.4	4249.1	10287.3	8568.5	9026.8	6884	7754.2	15400.2	11408.8	10261.2	5380	18741.1	7348.7	5194.3	6656.3	5207.5	4648.7	10296.4	12887.7	14328.6	9272	17457.7	7922.4	6292.2	5299	4936.1	6548.9		0.58703	0.734341	0.770115	0.71704	0.844562	0.730617
77	77	3554	P21107	Tropomyosin alpha-3 chain OS=Mus musculus OX=10090 GN=Tpm3 PE=1 SV=3	Tpm3	33	4.72	38735	71	2660	38	1	18892.1	21891.1	21994.9	39234.4	22942	17357.9	23599.7	23188.8	36001	24248.4	14646.3	27763.6	22003.8	42231.9	15825.6	16905.2	27248.6	22730.9	40797.6	26218.6	16370.6	19664.3	5953.2	36949.8	18150.4	15444.5	24571.1	22895.7	35338.3	24049.9		0.98736	1.04116	0.889768	0.981592	0.991814	0.978339
78	78	2075	Q6PAM1	Alpha-taxilin OS=Mus musculus OX=10090 GN=Txlna PE=1 SV=1	Txlna	62.3	6.74	11175	68	535	39	1	12606.6	9275.4	7009.2	11880.3	12236.6	12102.4	8688.8	7917.8	13611	12564.5	10352.8	9310.5	8107.9	13038.5	7415.8	12008	7944	7327.6	10045.5	10239.1	5188.3	7727.9	1968.6	11446	7350.4	11718.1	9357.1	7700.7	13404.1	13519.9		0.972581	1.07692	0.968246	0.984799	1.07604	1.01572
79	79	883	Q61316	Heat shock 70 kDa protein 4 OS=Mus musculus OX=10090 GN=Hspa4 PE=1 SV=1	Hspa4	94.1	5.24	7210	67	491	48	1	7148.5	5696.1	6394.1	10407	5932.2	8795	7108.4	8304.2	10682	7965.8	11216.7	8100.4	8784.6	8945.8	10260.2	7861.5	5603.1	7661.6	10147.4	6362.4	9515	8583.4	12947.9	9971.2	11158.5	8554.1	5994.3	5928.7	7747.7	6262		0.71394	0.84327	0.972609	0.725304	0.786111	0.808247
80	80	2199	P29533	Vascular cell adhesion protein 1 OS=Mus musculus OX=10090 GN=Vcam1 PE=1 SV=1	Vcam1	81.3	5.3	9266	55	501	32	0	3827.6	6773.7	6261.3	4621.1	4898.9	7144.1	9402.9	8217.1	5961.3	8626.6	7322.3	12454.1	7527.1	7630.7	8721.9	4456.7	3578.4	8390.6	4207.7	4060.8	8050.2	11309.9	4018.5	9221.7	10782.8	5099.3	5809.2	5284	4754.1	7821		0.643049	0.617809	0.713778	0.797494	0.906614	0.735749
81	81	629	P26041	Moesin OS=Mus musculus OX=10090 GN=Msn PE=1 SV=3	Msn	67.7	6.6	10640	69	664	47	13	5437.2	5101.8	7156.4	3746.5	4946.6	8119.2	5075.3	8668.6	3754.8	6449.8	12898.4	6679.7	9856.2	4337.3	18136	6240.9	3915.2	8332.3	3870.4	5228.7	20571.5	7290.5	46898.4	4570.3	18878.9	7122.3	4278	6776.6	3226.7	5842.4		0.781741	0.842906	0.877217	0.859353	0.905827	0.853409
82	82	610	Q01853	Transitional endoplasmic reticulum ATPase OS=Mus musculus OX=10090 GN=Vcp PE=1 SV=4	Vcp	89.3	5.26	10404	60	534	38	0	3229.8	1917.1	4252.3	1721.5	1704.9	4887.8	2128.7	4834.8	1714	2728.1	7875.3	3004.3	5741.1	2022.5	10457.8	4275.3	1473	4725.9	3624.7	2013.9	10316.9	4181.6	21237.8	2578.6	9502.6	4193.7	1776.7	3583.8	1441.8	2366.7	Acetyl [N-Term]	0.741251	0.834641	0.857993	0.84119	0.867527	0.82852
83	83	3248	Q99NB9	Splicing factor 3B subunit 1 OS=Mus musculus OX=10090 GN=Sf3b1 PE=1 SV=1	Sf3b1	145.7	7.09	11034	34	447	36	0	6715.9	4326.2	5236.7	6045	6688.3	6711.8	6156.2	5694.6	9148.8	9317.5	5788.2	5467.5	4627.7	5439	4449	6755.8	5320.8	7037.7	7158.4	8721.4	4807.2	5710.8	3550.6	6039.7	5249.1	7966.6	5583.5	6070.4	7387.9	7808.5		1.06599	0.906972	1.18695	0.807527	0.838047	0.961098
84	84	3031	Q8CJF7	Protein ELYS OS=Mus musculus OX=10090 GN=Ahctf1 PE=1 SV=1	Ahctf1	247.5	6.55	6530	25	318	44	0	1215.4	2350.5	1949.5	459.9	1084.9	1312.8	2791	2038.3	788.6	1292.7	1211.7	2209.1	1831.9	568.8	811.8	1357.1	2018.8	2335.7	530.9	1164.6	890.9	2326.8	602.6	548.2	930.8	1399.5	2649.7	2043.1	710.4	1201.4		1.00235	0.949373	1.06604	0.900837	0.929373	0.969596
85	85	3769	P06728	Apolipoprotein A-IV OS=Mus musculus OX=10090 GN=Apoa4 PE=1 SV=3	Apoa4	45	5.47	13199	78	678	31	0	19200.9	13756.6	12162.4	12498.6	18248.9	15589.1	11000.7	13815.1	15730.5	11722.8	15889.1	16616.7	16274.1	34410.4	15141.8	12950.9	14815.1	12132.6	21345.9	11432.4	19853	15037	5363.5	28364.7	16797.1	17268	14742.2	12889.4	15591.3	11674.9		0.932994	1.34011	1.1077	0.991151	0.995914	1.07357
86	86	3645	Q9JIK5	Nucleolar RNA helicase 2 OS=Mus musculus OX=10090 GN=Ddx21 PE=1 SV=3	Ddx21	93.5	9.11	5831	52	386	41	0	9385.9	7030	7627.7	5760.1	8870.1	8201.3	9049.1	8198.7	9150.4	13250.3	6926.9	7461.3	7566.1	5370.8	5038.9	9226.2	7244.2	9363.1	7062	12648.1	3847.1	7963.1	3407.1	5174.3	5348.3	10061.3	8044.9	8180.1	7611.7	11156.6		0.997731	0.889028	1.22679	0.831843	0.841988	0.957477
87	87	773	O70400	PDZ and LIM domain protein 1 OS=Mus musculus OX=10090 GN=Pdlim1 PE=1 SV=4	Pdlim1	35.8	6.84	16172	91	835	27	0	15686.9	13614.8	14525.1	20864.9	12058.5	12036.4	15488.3	12267.1	18832.8	12926.6	10862.2	10349.8	11738.2	20603	6976.2	14682.6	14404.5	14396.8	25226.7	13908	7743.4	10603	3432.3	19886.9	7137.9	13155.4	12418.1	12689.8	20886.8	12675.3	Acetyl [N-Term]	1.03446	0.801773	1.09297	1.10907	0.980559	1.00376
88	88	3153	Q91WJ8	Far upstream element-binding protein 1 OS=Mus musculus OX=10090 GN=Fubp1 PE=1 SV=1	Fubp1	68.5	7.93	20132	61	1087	36	0	34559.2	34358.3	30870.1	32839.3	34706.2	27435.1	33586.8	20661.4	26916.6	28497.1	22467.7	22055.6	19754.4	25691.3	15449.7	34109.7	41481.6	28208.4	41906.6	37266.6	16135.4	23294	5425.2	25816.4	15435	28989	29660.9	25497.6	27214.3	28594.3	Acetyl [N-Term]	1.23407	0.883112	1.05664	1.01106	1.00341	1.03766
89	89	218	P14824	Annexin A6 OS=Mus musculus OX=10090 GN=Anxa6 PE=1 SV=3	Anxa6	75.8	5.5	9313	70	530	45	2	5319.8	3043.5	6693.5	1594.5	1426.2	7976.4	4200.1	11354.3	1967.4	2521.2	10987.7	5126.7	9661.3	1970.2	6837.3	6508.6	2170.4	10397.6	1241.8	1537.9	18665.6	5711	33186.6	2891.4	7225.4	8169.7	2521.4	7687.9	1599.4	2163.9		0.677091	0.600319	1.02423	0.812951	0.858282	0.794575
90	90	539	P58252	Elongation factor 2 OS=Mus musculus OX=10090 GN=Eef2 PE=1 SV=2	Eef2	95.3	6.83	8598	54	522	39	1	4520.4	3861.5	8064.1	2565.4	2765.4	9096	3831.6	8757.2	2667.9	5252.1	16045.4	5479.7	10236.7	2147.3	21006.1	8331.6	1814.4	9042.4	2128.3	3482.6	13573.5	9030.6	28914.9	3719	19014	7631.9	2559	5018.4	1792.5	3970		0.57306	0.667867	0.839039	0.671877	0.755888	0.701546
91	91	3039	P62960	Nuclease-sensitive element-binding protein 1 OS=Mus musculus OX=10090 GN=Ybx1 PE=1 SV=3	Ybx1	35.7	9.88	27965	71	1364	19	0	11391.7	11185.5	9739.4	13120.5	14965.4	7984.3	9706.2	7364.5	10812.6	10946.7	5057.7	6434	6110.9	7614.6	3155	10250.5	13728.5	8622	14600.5	15892.2	1844.3	6500.9	619	6011	2834.7	9677.9	10827.8	9302.3	11800	11637.3	Acetyl [N-Term]	1.26313	1.11556	1.21212	1.09132	1.06309	1.14904
92	92	3133	Q8R550	SH3 domain-containing kinase-binding protein 1 OS=Mus musculus OX=10090 GN=Sh3kbp1 PE=1 SV=1	Sh3kbp1	78.1	7.55	10781	50	554	31	0	5111.7	3957.5	3057.9	3594.6	3828.8	8109.6	5624.1	5098	6795.1	7632.7	10408.1	10095.2	6472.9	14348.5	11697.2	4878.2	3468.2	4015.6	4419.8	3547.2	19602.5	7315.2	4464.1	11950.4	13613.3	6560.9	4783.2	4372.9	6050	7242.4		0.857768	0.850483	0.809029	0.890347	0.948865	0.871298
93	93	3233	Q61164	Transcriptional repressor CTCF OS=Mus musculus OX=10090 GN=Ctcf PE=1 SV=2	Ctcf	83.7	6.9	8426	50	489	31	0	12286.1	8789.5	11369.9	7746	4737.3	8456.9	8327	7162.1	6835.4	4129.7	9148.8	4411	6410.1	5099.7	2732.3	12292.2	7977.2	10133.8	8766.7	6439.3	2881	5704.4	2274.8	7760.7	2320.7	9017.9	6302.9	8050.3	9511.7	4297.4	Acetyl [N-Term]	1.12401	0.756923	1.06634	1.39154	1.04061	1.07588
94	94	4392	Q60865	Caprin-1 OS=Mus musculus OX=10090 GN=Caprin1 PE=1 SV=2	Caprin1	78.1	5.25	19899	39	1100	25	0	23308.3	21363.1	26121.9	29467.2	27270.9	17779.1	18458	19919.7	26329.2	23209.9	13767.8	16497.5	17658.3	24766.7	9234.9	20052.9	19946.4	24140.2	30543.4	26806.4	5384.8	15049.3	2353	21158.7	9122.7	20042.4	19971.7	23173.5	28455.8	25542.2	Acetyl [N-Term]	1.16335	1.08201	1.1273	1.08077	1.10049	1.11078
95	95	3196	B9EKI3	TATA element modulatory factor OS=Mus musculus OX=10090 GN=Tmf1 PE=1 SV=2	Tmf1	121.7	4.87	6379	52	382	48	0	2578.1	3153.7	1515.3	2455.4	3081.1	2367.8	3196.9	1347.4	2116.3	2582.2	2127.6	3144.1	1271.4	2340.4	1611.1	2335.3	3384.9	1459.9	2322.1	2810.6	2210.7	3006.2	730.2	2056.3	1790.6	2659.3	3441.3	1482.9	2110.5	2429.5		1.10056	1.07645	1.12311	0.997259	0.940864	1.04765
96	96	149	Q61937	Nucleophosmin OS=Mus musculus OX=10090 GN=Npm1 PE=1 SV=1	Npm1	32.5	4.77	15398	78	1349	21	0	16227	23992.4	21584.3	22487.6	9756.1	14467.9	19146.6	16774.5	23392.5	12844.2	13522.4	17023.6	20339.4	23920.3	12942.1	21375.1	24456.1	19639.7	22191.2	12232.4	5739	19592	5289.8	24489.3	12280.4	11104.9	19371.4	17506.8	22236.5	11935.1	Acetyl [N-Term]	1.04366	1.01174	0.767554	0.950582	0.929221	0.940551
97	97	3517	P38647	Stress-70 protein, mitochondrial OS=Mus musculus OX=10090 GN=Hspa9 PE=1 SV=3	Hspa9	73.4	6.07	7956	53	391	34	0	2328.4	3130.4	3189.4	1641.7	2975.9	4530	4412.8	4927.3	2421.5	6347.6	5976.3	4129.6	5133.4	1785.9	11497	3032	2369.8	3756.4	1644.9	3398	3844.2	5475.9	6259.4	2408.4	10214.4	3087.7	2979.9	3061.6	1886.6	5711.6		0.621354	0.675286	0.681611	0.779104	0.899805	0.731432
98	98	2698	Q60598	Src substrate cortactin OS=Mus musculus OX=10090 GN=Cttn PE=1 SV=2	Cttn	61.2	5.4	11082	58	591	36	0	20150.6	13951.5	18382.6	26429.3	20943.6	21319.8	16845.9	19445.1	24927.3	18825.5	15886.7	14496.2	15401.6	25464.8	11385	19240.8	14963.6	19351.1	26592	19541.9	24733.4	14844.1	6697.5	22078.1	12119.1	21665.6	17604.3	21855.5	23748.1	17259.4		1.12396	1.04502	1.01622	0.952694	0.91681	1.01094
99	99	1912	O08749	Dihydrolipoyl dehydrogenase, mitochondrial OS=Mus musculus OX=10090 GN=Dld PE=1 SV=2	Dld	54.2	7.9	13028	53	684	21	0	25918.6	15639.7	21268.8	29756	26692.8	10425	8307.8	8320.8	17372.7	10143.2	4498.5	2967.6	5531	13329.1	2960.4	19394.7	23326.3	17814.7	30709.3	26580.1	3330	3652.3	4637.6	11918.3	2774.4	21632	11596.5	17155.4	22029.5	9198.1		2.06175	1.39586	2.07501	1.26805	0.906824	1.5415
100	100	3263	O35887	Calumenin OS=Mus musculus OX=10090 GN=Calu PE=1 SV=1	Calu	37	4.67	11313	74	768	25	0	23801.1	27735.7	29030.4	16889	26130.7	24111.3	29496.5	21679.9	17666.1	24204.7	17333.7	22601.6	17734.3	18546.3	14405.8	25307.9	31156.6	29234.3	18655	24688.8	22258.1	24693.6	5517.9	17068.9	13467.3	22890.1	29287.9	28129.1	16722.1	23802.7		1.29747	0.992928	0.949352	0.946564	0.983392	1.03394
101	101	224	Q9JKB3	Y-box-binding protein 3 OS=Mus musculus OX=10090 GN=Ybx3 PE=1 SV=2	Ybx3	38.8	9.69	20290	65	1025	19	6	29000.8	24789.8	29197.4	25764.1	33238.5	17931.3	18933.2	15760.6	18159.8	20451.5	12712.4	12735.5	13800.1	14955.8	8703.6	25311.5	31016.2	25557.5	27761.3	34620.6	3807.2	13460.2	2338.3	11373.5	7463.7	23401.6	21631.6	25654.8	21163.8	24108.5	Acetyl [N-Term]	1.62778	1.14252	1.30507	1.16542	1.17881	1.28392
102	102	1322	Q8BGD9	Eukaryotic translation initiation factor 4B OS=Mus musculus OX=10090 GN=Eif4b PE=1 SV=1	Eif4b	68.8	5.67	23908	46	1049	33	0	37030.9	36619.5	30547	35260	34616	28283.2	32820	21981.2	26075.6	26750.6	21299.4	26287.5	18991.4	25852.7	12945.5	34990.2	41909.4	28349.5	36625.4	35048.6	14706.7	25325.7	4305.8	21760	12582.3	33476.4	35991.4	28489.2	29065.9	28169.1		1.29607	1.09663	1.18361	1.11468	1.05303	1.1488
103	103	1047	P51859	Hepatoma-derived growth factor OS=Mus musculus OX=10090 GN=Hdgf PE=1 SV=2	Hdgf	26.3	4.83	17845	87	1034	31	1	31873.4	22506	22634.7	24335.6	32342.6	29261.2	24408.3	22274.1	21545	25901.8	21000.4	18865.6	20696.6	19127.5	13844.6	30624.1	22385.4	21790.2	26136	31329.2	19197.9	19142	4412.5	18818.9	14900.6	29926	23515.4	23016.6	21912.4	26636.3		1.03333	0.963418	1.02272	1.01705	1.02836	1.01298
104	104	1798	P27773	Protein disulfide-isomerase A3 OS=Mus musculus OX=10090 GN=Pdia3 PE=1 SV=2	Pdia3	56.6	6.21	11007	64	611	36	0	8215.5	5909.6	9788.6	8086.7	7268.5	12197.3	6872	13221.8	10163.8	9693	25715	10604.5	18114	12005.6	35513.3	8034.8	4435.5	11562.1	8274.1	6316.3	20465.6	10657.9	52686	14376.4	28870.3	11453.2	5928.8	8923.9	8819	9112.8		0.674938	0.862747	0.938995	0.867687	0.940142	0.856902
105	105	3582	A2AL36	Centriolin OS=Mus musculus OX=10090 GN=Cntrl PE=1 SV=2	Cntrl	268.7	5.52	3294	25	234	51	0	623.9	646.9	424.7	245.1	490.5	596.7	735.5	427	280.9	561.4	555	774.9	468.2	299.8	423.8	654.2	658.2	447.6	222.7	484.9	536.5	648.1	149.4	257.5	473.1	598.7	672.8	400.3	307.3	561.4		0.937471	0.914752	1.00335	1.09398	1	0.989912
106	106	2548	P40142	Transketolase OS=Mus musculus OX=10090 GN=Tkt PE=1 SV=1	Tkt	67.6	7.5	8538	57	549	31	0	9044.3	5311.2	8765.8	9994.3	7155.6	10629.8	5369.8	7206.8	9090.8	7917.5	14992.8	6095.9	8000.1	8452.2	22155.2	11143.1	4788	8520.8	16053.4	7821.4	18475.3	9829.8	36397.2	11135.6	21866.5	12553.1	4150.8	8478.4	8639.3	6487.4	Acetyl [N-Term]	1.17644	0.77299	1.18093	0.950334	0.819375	0.980016
107	107	144	P52480	Pyruvate kinase PKM OS=Mus musculus OX=10090 GN=Pkm PE=1 SV=4	Pkm	57.8	7.47	8737	65	367	31	1	1420.3	1526.2	3011.5	486.7	930.5	2724.2	1338.9	3801.9	536.9	1422.4	5771.9	2396.2	4782.4	476.8	7291	2590.5	655.4	3707.7	366.3	969.5	7124.9	4122.9	27166.7	790.4	6870.7	2212.1	885.2	2160.3	309.5	1187.2	Acetyl [N-Term]	0.568216	0.66114	0.812018	0.576457	0.834646	0.690495
108	108	4322	P08113	Endoplasmin OS=Mus musculus OX=10090 GN=Hsp90b1 PE=1 SV=2	Hsp90b1	92.4	4.82	11683	48	545	36	0	2505.3	3858.8	4472.5	1309.6	1433.3	6917.7	3892.3	8896.7	1764.2	3543.6	13833.6	7153.5	12001.7	1609.4	17763.7	3493	2117.2	5508.8	784	1379.2	19987.5	9051.9	29761	4048.3	19231.4	4347.1	2970.5	4797.4	1166.3	2877.4		0.539234	0.763173	0.628403	0.661093	0.811999	0.68078
109	109	4637	Q61879	Myosin-10 OS=Mus musculus OX=10090 GN=Myh10 PE=1 SV=2	Myh10	228.9	5.54	7326	27	471	47	0	438.5	100.4	70.3	45.9	262.4	354	145	100.4	29.9	208.7	295.2	126.3	79.9	27.9	194.4	412	130.8	86.3	22.7	232.7	393.9	137.6	118.3	20.9	151	447.8	200.5	78.3	27.6	215.8		0.77988	1.38276	1.26497	0.923077	1.03402	1.07694
110	110	2122	P28665	Murinoglobulin-1 OS=Mus musculus OX=10090 GN=Mug1 PE=1 SV=3	Mug1	165.2	6.42	4298	32	335	38	0	4874.4	1798.2	2312.1	1830.5	2437.2	7238.5	2253.1	5266.8	2146.8	3427	11452.8	2355.3	8001.6	3119.7	6602.7	4501.6	1002.1	1752.5	985.4	2266.3	12539	5404.8	3811	4176.9	5197.8	3637.6	1510.3	2503.2	1534.2	3770.4		0.475279	0.670321	0.502535	0.714645	1.1002	0.692597
111	111	1894	Q05D44	Eukaryotic translation initiation factor 5B OS=Mus musculus OX=10090 GN=Eif5b PE=1 SV=2	Eif5b	137.5	5.59	7208	25	362	33	1	2766.4	3532.5	3639.9	1980.6	4164.9	3837.2	4847.2	4624.3	2889.8	5230.5	3744.8	4394.2	4032.8	2893.4	3621.6	3273.8	3576.6	4711.1	2351.5	4211.6	3326.7	4780	1930.3	2856.7	3817.6	3644.6	4391.2	4343.1	2544.4	4381.5		0.939191	0.905925	0.949807	0.880476	0.837683	0.902616
112	112	4146	Q6A065	Centrosomal protein of 170 kDa OS=Mus musculus OX=10090 GN=Cep170 PE=1 SV=2	Cep170	174.9	7.17	4331	34	299	48	0	1661.7	2907.2	1586.5	1908.1	1463.2	2140.3	4188.3	2027.9	2119.5	2099.7	1780.4	3755.1	1782.5	2440.6	1291.6	1557.3	2883.3	1875.5	1874.3	1510.1	1852.2	3707.9	1543.2	1818.4	1475.2	2343.4	3679	2133.2	1982.2	1938		1.05193	0.878399	1.09489	0.935221	0.922989	0.976686
113	113	713	Q8VDN2	Sodium/potassium-transporting ATPase subunit alpha-1 OS=Mus musculus OX=10090 GN=Atp1a1 PE=1 SV=1	Atp1a1	112.9	5.45	8529	38	361	36	0	3854.6	3434.8	6658.8	1765.9	1735	5205.8	3521	8357.6	1738.8	2245.4	4011.3	2884.9	6606.6	1285.8	2345.7	5269.6	2266.7	8670.3	1119.7	1653	4138.5	3665.4	6675.4	1810	2230.8	4610.8	2719.8	6230.4	1660.2	2403.8		0.745477	0.772451	0.885704	0.954796	1.07054	0.885795
114	114	2269	Q6ZPZ3	Zinc finger CCCH domain-containing protein 4 OS=Mus musculus OX=10090 GN=Zc3h4 PE=1 SV=2	Zc3h4	140.9	6.27	9596	38	460	35	0	11692.8	7122.6	7982.3	11009.3	7705.1	9646.4	7547.2	7040.6	10589.6	7138.4	7943.4	5953.7	6173.7	10641.1	3808.9	10982.3	7562.9	8021.9	12296.7	8845.1	6024.9	5760.2	1523	9227.9	4223.7	11336.7	7167.5	7519.1	11148.2	7293.4		1.06796	0.94969	1.17523	1.05275	1.02171	1.05347
115	115	3785	Q02357	Ankyrin-1 OS=Mus musculus OX=10090 GN=Ank1 PE=1 SV=2	Ank1	204.1	6.55	7077	30	294	42	0	2429.6	1528.5	2453.6	2347.9	2278.1	2377.8	1493.4	2650.5	1563.1	1912.4	1653.1	1646.3	2063.6	1471.4	1427.8	2395.7	1632	2440.6	1464.9	2140.6	2087.8	1375.8	2064.7	1147.2	1364.5	3322.6	1830.4	3483.2	1706.9	1984.4		1.31417	1.22566	1.39734	1.092	1.03765	1.21336
116	116	1190	Q3UZA1	CapZ-interacting protein OS=Mus musculus OX=10090 GN=Rcsd1 PE=1 SV=1	Rcsd1	44.1	5.16	18328	84	711	31	0	15200.1	15709	15586.4	12759.7	12690.3	13523.5	16102.8	12454	11303.8	12037.2	10323.6	13820.3	10918.3	13253.4	6783.1	14351.8	20723.9	16666	15036	14544.3	9513	11382.1	3129	10447.6	8275.4	12563.7	14919.2	15228.8	11174.5	12273.4	Acetyl [N-Term]	1.2228	0.926497	0.929027	0.988561	1.01962	1.0173
117	117	3383	Q8VBT6	Apolipoprotein B receptor OS=Mus musculus OX=10090 GN=Apobr PE=1 SV=1	Apobr	102.6	4.36	6597	41	305	36	0	1276	2273.7	1590.1	577.5	1763.4	1599.8	3044.7	1485.3	688	1856.7	1811.6	3556.6	1437.8	1071.9	1820.8	1339.2	2454	1504.2	621.1	1483.9	1984.2	3089.4	989.8	871.9	2012	1796.7	2956.5	1594.7	664	1706.5		1.07366	0.971032	1.12308	0.965116	0.919104	1.0104
118	118	2192	P55937	Golgin subfamily A member 3 OS=Mus musculus OX=10090 GN=Golga3 PE=1 SV=3	Golga3	167.1	5.4	3124	36	179	41	0	900.6	232.7	207	722.5	663.2	1447.7	336.4	400.5	943	1039	1115	481.8	468.3	997.4	717.5	900.2	165.9	244.7	807	676.1	1569.4	359	199.3	822.9	847.5	1084.6	262.8	315.4	810.1	1053.1		0.787516	0.781213	0.749188	0.859067	1.01357	0.838111
119	119	1787	Q62384	Zinc finger protein ZPR1 OS=Mus musculus OX=10090 GN=Zpr1 PE=1 SV=1	Zpr1	50.7	4.78	8572	74	392	28	0	5707.8	5192	4150.8	4914.6	3778.2	6894.4	5108.6	5907.5	6672	6457.2	6742.5	5867.8	6075.3	7759.7	5060.8	5986.6	3166.2	4733.1	4199.6	3093.6	4224.8	5233.2	1412.3	8145.9	5000	5150.7	4016.1	4222.4	6241.9	6900.9		0.714752	0.786145	0.747085	0.935537	1.06871	0.850447
120	120	286	Q569Z6	Thyroid hormone receptor-associated protein 3 OS=Mus musculus OX=10090 GN=Thrap3 PE=1 SV=1	Thrap3	108.1	10.17	7889	31	504	36	1	14956.3	12303.2	13563.3	8991.4	8660.8	18338.7	14580.2	17246.1	19105.9	15618.4	16146.8	15536.7	16241.1	9592.3	7855.9	15124.5	10810.8	15372.1	8384.1	9846.7	8947.8	15913.2	6674.7	13614.6	7632.5	18751.2	14901.7	17775.7	15967.8	15510.3		1.03071	1.02205	1.02249	0.835752	0.993079	0.980817
121	121	3474	Q8R2M2	Deoxynucleotidyltransferase terminal-interacting protein 2 OS=Mus musculus OX=10090 GN=Dnttip2 PE=1 SV=1	Dnttip2	84.2	6.44	7862	52	366	36	0	4891.3	5894.1	4739.4	2763.4	2577.6	4909.4	5247	5141.2	4496.2	3593.1	4401.6	4653.1	5272.5	3801.1	2160.2	4573.2	5269.2	5165	2890.6	2865.6	3201.1	5384.2	1243.6	4100.4	2212.7	5187.1	5712.5	5659.5	3883.7	3230.4		1.10081	1.08872	1.05656	0.863774	0.899057	1.00179
122	122	3428	Q99KJ8	Dynactin subunit 2 OS=Mus musculus OX=10090 GN=Dctn2 PE=1 SV=3	Dctn2	44.1	5.26	9619	65	441	25	0	4780.1	3884.7	3057.9	2809	3377.6	8104.6	3852.6	6951.3	5491.7	5625.1	10533.1	8540	8427.2	7929.6	10769	4845.4	2425.7	3614.8	2432.1	2443.1	11235.4	6420.4	4863.2	8663.5	11040.3	5382.7	3807.5	3743.8	4958.7	6099.8		0.538576	0.988294	0.664154	0.902944	1.08439	0.835671
123	123	3315	P28798	Granulins OS=Mus musculus OX=10090 GN=Grn PE=1 SV=2	Grn	63.4	6.8	7732	59	429	22	0	5783.3	4934.1	6399.5	7552.3	6491.6	6815.6	7674	7990.4	9872.8	7265.1	5171.8	6421.2	6662.4	10281	4430.5	5432	4910.4	7096.7	9502.8	6095	9006.8	6371.8	2798.1	10361.1	6609.8	6531.4	6327.9	6203.4	7693.4	5823.1		0.776357	0.82459	0.958302	0.779252	0.801517	0.828003
124	124	852	P56959	RNA-binding protein FUS OS=Mus musculus OX=10090 GN=Fus PE=1 SV=1	Fus	52.6	9.36	17643	32	1233	19	0	31316.3	36205.3	34043.3	41015.2	34777.6	27613.8	36099.2	31922.9	34684	30525.6	21859.9	32794.2	29415.3	38137	16673.2	29533.8	30505.6	34944.6	44947.2	39077.7	16822.1	31337.5	6258.4	31039.4	17566.6	29841.8	37928.7	31957.6	35417.5	33207.3		1.00109	1.05068	1.08068	1.02115	1.08785	1.04829
125	125	1110	P81117	Nucleobindin-2 OS=Mus musculus OX=10090 GN=Nucb2 PE=1 SV=2	Nucb2	50.3	5.15	9508	68	443	26	0	10207.3	7397	6829.3	7698.6	6506.5	11371.5	8322.5	6573.6	9196.5	7822.7	7266.3	6767	4997.4	8330.7	4522.1	10272.9	7995.6	6857.8	7767.4	6609.5	8826.3	6816.1	2559.4	7928.7	5128.9	9142.2	8167.2	7151.4	8309.9	7930.8		1.0879	0.98134	0.803957	0.903594	1.01382	0.958121
126	126	202	Q61029	Lamina-associated polypeptide 2, isoforms beta/delta/epsilon/gamma OS=Mus musculus OX=10090 GN=Tmpo PE=1 SV=4	Q61029	50.3	9.45	14790	54	505	22	0	1774.4	1202.9	1788.5	4612.7	2258.8	2031.4	1572.6	1744.9	5560.3	2917.9	2110.6	2502.4	1793.4	5742.8	1742.1	1586.8	1204.3	2015	4375.8	2319.8	1930.9	1901.5	1561.8	4594.3	1938.6	2393.2	1445.7	1791.6	4823.4	2808.9	Acetyl [N-Term]	1.02676	0.919306	1.1781	0.867471	0.962644	0.990858
127	127	87	Q62318	Transcription intermediary factor 1-beta OS=Mus musculus OX=10090 GN=Trim28 PE=1 SV=3	Trim28	88.8	5.77	11286	53	420	27	0	2944.3	3103.2	2254.4	3116.5	4261.5	3926.2	4171.8	2856	3785.7	5872.4	5309.9	5548.5	3943.4	4396.8	10449.5	3334.2	3149.2	2968.5	3409.9	4083.5	4264.4	6071.5	4287.9	4466.3	10629.6	3102.8	3362.6	2053.2	3851.7	5151.3	Acetyl [N-Term]	0.718908	0.806031	0.790281	1.01743	0.877205	0.841972
128	128	3788	Q91WG2	Rab GTPase-binding effector protein 2 OS=Mus musculus OX=10090 GN=Rabep2 PE=1 SV=3	Rabep2	62.1	4.89	6180	58	313	34	0	2300.2	2804.5	837.3	1495.2	1823.2	3269.8	3365.2	1653.1	2027.4	2777.2	2785.2	3931.3	1935.8	2193.1	2482.1	2634.1	2560.5	1121	1342.1	1643.5	4689.5	3188.6	1376.2	2156.2	3067.6	2268.6	3308.1	1265	1736.9	2615.9	Acetyl [N-Term]	0.765229	0.983032	0.693804	0.856713	0.94192	0.84814
129	129	945	P48725	Pericentrin OS=Mus musculus OX=10090 GN=Pcnt PE=1 SV=2	Pcnt	329.3	5.36	2570	21	171	47	0	930.1	615.9	343.7	523.2	703.7	910.1	622.4	406.7	549.7	877	842.8	573	431.3	492.1	608.9	942.9	473.4	360.5	496.3	728.4	777.6	640.4	254.5	440.8	695.5	920.2	568.8	363.3	565.2	888.5		0.893287	0.913882	1.0111	1.0282	1.01311	0.971915
130	130	4686	P70399	TP53-binding protein 1 OS=Mus musculus OX=10090 GN=Tp53bp1 PE=1 SV=3	Tp53bp1	212.6	4.63	3415	27	226	32	0	505	767.1	773.6	807.4	866.5	589.4	1059.4	916.7	1022.3	977.3	547.3	1178.2	886.8	990.7	735.1	507.5	985.6	1014.1	898.7	853.7	664.8	1046.3	363.7	864.4	827.6	630.9	1012.9	861.3	1041.7	905.5		0.939566	0.956107	1.07041	1.01898	0.926532	0.982319
131	131	1471	Q61687	Transcriptional regulator ATRX OS=Mus musculus OX=10090 GN=Atrx PE=1 SV=3	Atrx	278.4	6.68	3188	20	217	40	0	3593.2	1639.3	1503.3	2135.7	1716	3821.7	2096.1	1389	3346.3	2369.3	3504.3	2184.1	1344.4	3261.1	1547.3	3259.7	1536.4	1495.5	2015.9	1660.7	2747.9	2024	573.3	2751.5	1668.2	4034.1	1982.1	1413.6	3093.4	2252.7		1.01771	0.945613	1.05558	0.924424	0.950787	0.978822
132	132	927	Q99P72	Reticulon-4 OS=Mus musculus OX=10090 GN=Rtn4 PE=1 SV=2	Rtn4	126.5	4.54	9369	54	384	34	0	1508.7	2146.4	3558.4	1347.1	1363.2	1880.6	2326.2	2813.8	1236.4	1798.2	3953.2	4529.1	2957.6	2159.1	2810.1	1398.9	2026.5	4930	1359.4	1159.8	2560.7	3048.3	2495.8	1825	2964.8	1732.8	2411.2	1889.1	1238.8	1688.9	Acetyl [N-Term]	0.67137	1.03654	0.921408	1.00194	0.939217	0.914095
133	133	4278	P08003	Protein disulfide-isomerase A4 OS=Mus musculus OX=10090 GN=Pdia4 PE=1 SV=3	Pdia4	71.9	5.31	6064	51	383	31	0	3573.8	2004.3	3757.1	1628.2	2390.5	6019.6	3463.7	6562.5	3042.5	4313.9	9212.1	6248.7	8268.9	2762.3	8694.7	3020.4	1745.1	5021.5	2015.1	2348	12471.5	6094.3	23926.1	3838.5	10871.8	4064.6	2761	4711.1	2234.3	3453.9		0.717882	0.797124	0.675228	0.734363	0.800644	0.745048
134	134	4250	Q3UGC7	Eukaryotic translation initiation factor 3 subunit J-A OS=Mus musculus OX=10090 GN=Eif3j1 PE=2 SV=1	Eif3j1	29.3	4.81	13125	79	479	25	0	8261.3	7772.9	6783.9	4009.4	5729.9	8149.7	6899.1	9806.2	6425.9	6991.7	7775.6	9088.3	10586.3	7028.6	7796.2	6770.3	6061.3	6732	3910.6	4183.9	5325.9	8136.8	2799.1	6370.3	7204	9232.4	7228.5	7588.5	6508.5	8010.7	Acetyl [N-Term]	0.773847	1.04775	1.13285	1.01285	1.14574	1.02261
135	135	266	Q4VAA2	Protein CDV3 OS=Mus musculus OX=10090 GN=Cdv3 PE=1 SV=2	Cdv3	29.7	6.1	18212	81	745	23	0	15118.1	14274.5	16625.8	16190.6	16553.4	12134	12560.4	11067.5	12282	12247.8	9358.2	8709.5	9778.5	11186.7	6308.4	14957.7	17959.6	16309	16303.7	16734.6	6084.6	9312.7	2397.4	9709	6051	12193.5	12624	14485.7	12086.6	12943.1		1.30885	1.00506	1.0049	0.984091	1.05677	1.07194
136	136	1051	P63158	High mobility group protein B1 OS=Mus musculus OX=10090 GN=Hmgb1 PE=1 SV=2	Hmgb1	24.9	5.74	11321	64	1484	22	0	50728.5	47214.4	43057.9	66081.4	77756	34288.1	53282.2	33051.4	56676.7	64189.8	26089	29819.5	32834.7	46192.2	26834.3	49574.6	55285.3	41529.3	72038.2	97996.9	35176.5	32203.5	16327.9	44516.4	30676	40677.5	49909.4	41359.9	60546.6	67191.3		1.25138	0.936699	1.18634	1.06828	1.04676	1.09789
137	137	3101	P30681	High mobility group protein B2 OS=Mus musculus OX=10090 GN=Hmgb2 PE=1 SV=3	Hmgb2	24.1	7.31	24136	60	2513	23	3	71553.6	68084.4	79659.4	135760	126068	50179.4	72396.3	63153.1	102368	98152.9	40792.1	47552.5	60985.6	99608.7	42988.2	63933.1	76588.8	76207.8	131878	147896	33239.1	50970	15449.1	85395	46703.9	59139.8	70531.4	74674	116880	103906		1.18243	0.97424	1.17857	1.14177	1.05862	1.10712
138	138	3312	Q6PR54	Telomere-associated protein RIF1 OS=Mus musculus OX=10090 GN=Rif1 PE=1 SV=2	Rif1	266.1	5.57	2964	22	204	42	0	1105.2	668.8	334.6	1978.6	1772.1	1110.2	933.4	352.7	2359.5	2166	1069.4	785.6	325.8	1744.3	1225.8	1117.8	846.8	432.4	2386.1	2177.8	848.2	897.9	146.2	1718.5	1355.3	1302.3	933.7	350.1	2025.1	1753.8		0.992628	1.00032	1.17303	0.858275	0.809695	0.96679
139	139	1075	Q70FJ1	A-kinase anchor protein 9 OS=Mus musculus OX=10090 GN=Akap9 PE=1 SV=2	Akap9	435.9	5.03	2024	16	164	53	0	449	578.5	330.4	604.6	904.6	571.4	599.1	298.1	493.6	695.2	565.7	701.5	261.6	643.5	475.1	437.5	516	296.2	707.4	745.8	555.1	682.9	209.4	478.3	547.3	520.3	578.9	377.8	674.9	725.4		1.26736	0.966283	0.910571	1.3673	1.04344	1.11099
140	140	307	O88569	Heterogeneous nuclear ribonucleoproteins A2/B1 OS=Mus musculus OX=10090 GN=Hnrnpa2b1 PE=1 SV=2	Hnrnpa2b1	37.4	8.95	18994	66	945	25	4	18330.8	15373.6	15684.1	21823.9	24054.9	19795.6	21684.8	19594.2	26090	28083.1	17383.1	14618.7	18886.3	19619.2	15442.3	20085.1	14063.1	19458.4	24614.7	26184.1	18071.4	17591.1	21062.9	22014.4	18468.8	18536.2	18057.4	18522.4	22448.5	25101.8		0.9453	0.832722	0.93638	0.860425	0.89384	0.893733
141	141	2153	P68369	Tubulin alpha-1A chain OS=Mus musculus OX=10090 GN=Tuba1a PE=1 SV=1	Tuba1a	50.1	5.06	11980	59	529	22	21	3641.8	3196.4	6305.8	2999.4	2353.2	7433.5	2815.2	7322.3	2977.1	4230	17871.4	4905.4	9739.8	2602.4	28504	7725.1	1354.3	7121.6	1839.6	2492.8	15488.2	7899.8	42667.9	4814.4	21164.2	6737	1844.5	4103.7	1971.5	3786.5		0.560439	0.655193	0.906303	0.662222	0.895154	0.735862
142	142	1291	Q6Y685	Transforming acidic coiled-coil-containing protein 1 OS=Mus musculus OX=10090 GN=Tacc1 PE=1 SV=1	Tacc1	83.9	5.03	7182	49	335	36	0	3533.9	3502.2	2032	2264.8	2544.5	3817.8	3551.2	2337.5	2358.2	2465.7	3539	4075.5	2428.4	2554.9	1933.4	3346.9	3099.8	2017.8	1806.8	1971.3	3786.6	3614.4	907.1	2378.8	2062	3875.5	3938.1	2463	2368.4	2551.5		1.05369	1.10895	1.01511	1.00433	1.0348	1.04338
143	143	3552	Q5PSV9	Mediator of DNA damage checkpoint protein 1 OS=Mus musculus OX=10090 GN=Mdc1 PE=1 SV=1	Mdc1	184.6	5.19	5892	32	339	35	0	3351.9	4000.3	2738	2595.3	4280.2	3208.5	4831.4	2460.3	2355.8	3361.3	3250.9	3941.2	2251.4	1813.5	1757.1	3679.7	4394.1	3198.1	2806.8	4201	1740.8	3994	985.5	1571.5	1728.9	3543.8	4966.7	2903.3	2581.3	3090.9		1.18006	1.028	1.1045	1.09572	0.919555	1.06557
144	144	2087	Q6P6L0	Filamin A-interacting protein 1-like OS=Mus musculus OX=10090 GN=Filip1l PE=1 SV=2	Filip1l	129.7	6.37	4915	37	386	47	0	3204.5	3896.2	3204.1	3532	4467.5	3461.7	4743.3	3633.2	3913.1	5600.7	3128.3	5739.2	3594.7	5125.8	4124.4	3011.4	3688.1	3301.2	3731.5	4299.5	3672.1	4582.7	1595	3965	5000.4	3093.5	4628.1	3742.9	3424	5255.8		1.03019	0.975713	0.893636	0.87501	0.938418	0.942594
145	145	3586	E9Q5C9	Nucleolar and coiled-body phosphoprotein 1 OS=Mus musculus OX=10090 GN=Nolc1 PE=1 SV=1	Nolc1	73.7	9.36	8800	52	546	38	0	33196	37157.7	33513.2	35841.5	13985.2	19937.4	21481.8	19356.8	30761	14738.2	13877.7	11738.4	13004.4	17346.9	4307	40166.3	44885.5	32976.3	39976	19488.1	2853.3	16389.2	2904.2	16269.4	4513	19350.9	23672.4	24564.4	31596.9	11346.6		1.26903	1.10197	0.970583	1.02717	0.769877	1.02773
146	146	4222	Q02053	Ubiquitin-like modifier-activating enzyme 1 OS=Mus musculus OX=10090 GN=Uba1 PE=1 SV=1	Uba1	117.7	5.66	4279	41	228	33	0	635.8	242.1	1897.2	179	568	648.3	241.5	2206.4	142	692.9	1166	437.3	2311.4	161.4	2010.6	721.9	92.6	1920	126.8	653.9	1582.4	677.2	13744.5	177.9	2100.1	811.4	155.4	1722.6	126.6	746.1		0.780729	0.643478	1.25158	0.891549	1.07678	0.928823
147	147	2026	A2APB8	Targeting protein for Xklp2 OS=Mus musculus OX=10090 GN=Tpx2 PE=1 SV=1	Tpx2	85.8	9.38	5169	49	361	38	0	5038.8	7272.8	4720.6	4253.8	5667.1	3782.1	5358.7	3721.7	4232.6	5103.9	3222.2	5828.8	4053.1	3317.5	2034.7	3548.2	5580.7	3843.4	4476.4	4327.9	1370.9	4936.3	654.1	2795.5	2018.5	6182.7	7415.9	4859.3	5208.9	6050.2		1.30567	1.3839	1.63473	1.23066	1.18541	1.34807
148	148	1505	Q8K019	Bcl-2-associated transcription factor 1 OS=Mus musculus OX=10090 GN=Bclaf1 PE=1 SV=2	Bclaf1	105.9	9.99	5546	31	378	32	0	6761	9969.1	10610.1	5030.2	3343.3	7585.4	8911.2	10935.2	7316.8	4108.2	7390.6	9393.4	10712.7	5094	2937.8	7224.3	9047.4	10970.4	5351.6	3641.4	3386.8	9050.3	3415.4	6519.2	2785.1	7353.2	9057.6	10560.4	7061.7	4031		0.965725	1.01643	0.969389	0.965135	0.981208	0.979577
149	149	3110	P0DP27	Calmodulin-2 OS=Mus musculus OX=10090 GN=Calm2 PE=1 SV=1	Calm2	16.8	4.22	50810	94	3219	16	0	32597.7	40559.2	55328	19046.8	45381.7	29197.3	34262.4	29641.2	15379.2	35754.4	28578.4	26517.6	29099.2	21704.2	26652.8	43297.4	51663.7	51686.4	16507.9	41607.5	27865.1	29109	10296	16056.2	23885.4	26565.6	34187.3	51938.1	15566.2	39205.4	Acetyl [N-Term]	1.75223	0.997808	0.909865	1.01216	1.09652	1.15372
150	150	3199	O70251	Elongation factor 1-beta OS=Mus musculus OX=10090 GN=Eef1b PE=1 SV=5	Eef1b	24.7	4.69	19957	90	1299	19	2	27048.4	35280.3	25913.1	30725.9	27832.6	24695.9	34333.3	22958.1	30459.1	25345.3	18739.9	27930.8	19325.1	27885	14016.8	28797.5	31778.2	24859.6	32666.1	27533.9	11090.3	26838.2	3159.8	28317.5	13099.7	24163.6	33824.2	23327.5	30595.9	26941.5		1.01609	0.985172	0.978446	1.00449	1.06298	1.00944
151	151	356	Q99JF8	PC4 and SFRS1-interacting protein OS=Mus musculus OX=10090 GN=Psip1 PE=1 SV=1	Psip1	59.7	9.13	7255	45	534	26	0	13772.4	8217	11419.5	14250.6	14321.3	11660	8087.6	9193.6	11141.5	12170.7	11631.2	8163.8	10206.1	15477.2	8999.5	12568.2	7710.7	11141	14346.7	14751.8	10118.6	8122.9	3655.5	11362.9	9084.8	13125.9	8487.8	10891.9	12251.7	12866.7		1.18473	1.04948	1.12572	1.09965	1.05719	1.10335
152	152	256	O08677	Kininogen-1 OS=Mus musculus OX=10090 GN=Kng1 PE=1 SV=1	Kng1	73.1	6.54	10127	35	452	22	0	12994.5	12442.6	9232.5	16396	13532.3	12007.8	10316.4	8436.1	12591.2	9894.4	9200.4	11354.4	9115.9	13295.7	7967	11715.9	10018.7	5841.6	9170.1	11577.9	12836.3	11764.9	3304.2	12559.5	7220.9	10933.8	10093.8	7124.2	11384.5	11633.7		0.84449	0.978423	0.910558	0.904163	1.17579	0.962684
153	153	1924	Q8R4U7	Leucine zipper protein 1 OS=Mus musculus OX=10090 GN=Luzp1 PE=1 SV=2	Luzp1	119.2	7.99	3745	44	230	41	0	1342.3	1365.2	666.3	1558	1479.3	1395.4	1345	705.7	1721.7	1796.7	1253.9	1599.7	786	2157.7	1175.4	1232.1	1185	725.6	1682	1420.3	943.5	1718.6	389.4	1846.8	1341.3	1378.7	1162.8	691.6	1627.7	1708.1		0.98002	0.864535	0.988032	0.945403	0.950687	0.945735
154	154	4053	P68033	Actin, alpha cardiac muscle 1 OS=Mus musculus OX=10090 GN=Actc1 PE=1 SV=1	Actc1	42	5.39	20589	58	1464	17	0	2008.3	806.5	2522.5	2379.1	1199.8	3563.2	904.9	3634.3	3769.2	2399.9	6960.3	1601.2	4418.5	3603.1	9884.4	2890.7	660.4	3293.2	2342.9	1515.8	13020.5	1640	28795.5	5920.7	10332.1	3405.7	849.2	2157.2	2344.6	1942.6		0.593567	0.938446	0.955798	0.622042	0.80945	0.783861
155	155	2946	P06800	Receptor-type tyrosine-protein phosphatase C OS=Mus musculus OX=10090 GN=Ptprc PE=1 SV=4	Ptprc	144.7	5.94	6202	30	373	35	0	4602	2711.8	4154.4	1547.4	2732	8965.4	4444	7333.2	2492	4711	9538.1	5978.4	7208.1	2210.8	9300.2	5232.9	2278.1	6272.2	1528.7	2773.8	18208.3	5041.9	15630.2	3036.9	9141.2	6905.2	3282.8	6151.8	2224.4	4528.4		0.838897	0.738704	0.770205	0.892616	0.96124	0.840332
156	156	4638	Q9CSN1	SNW domain-containing protein 1 OS=Mus musculus OX=10090 GN=Snw1 PE=1 SV=3	Snw1	61.4	9.48	6326	56	462	28	0	9499.4	7727.1	6804.8	10611.1	9047.7	8172.8	7955.8	6550.9	11336.4	9545.9	7894.4	7320.5	6424.4	10443	5402.6	9230	7716.6	7412.4	12732	10340	6129.8	6891.9	2330.7	9322.2	5472.7	9922.4	7631.8	7705.1	11061	9457.8	Acetyl [N-Term]	1.17619	0.959275	1.21408	0.975707	0.990771	1.0632
157	157	1793	Q5F2E7	Nuclear fragile X mental retardation-interacting protein 2 OS=Mus musculus OX=10090 GN=Nufip2 PE=1 SV=1	Nufip2	75.6	8.7	7465	49	367	24	0	6704.5	5887.1	3334.2	5747.1	5891.2	5864.1	5605.1	3119.8	5506.1	5065.6	4544.6	4333.6	2841.7	5055.1	2317.6	6551.6	5440.7	3433.1	6621.3	5563.7	2171.3	4304.6	578.4	4411.7	2255.2	5730.5	5751.8	3227.9	5526.8	5261.3		1.03465	1.02617	0.977217	1.00376	1.03863	1.01609
158	158	3062	Q62523	Zyxin OS=Mus musculus OX=10090 GN=Zyx PE=1 SV=2	Zyx	60.5	6.4	9106	55	532	20	0	10337.4	9084.8	7879.6	10704.3	8252.1	12138.9	13967.7	11441.1	18526	12681.9	12115.7	12292.4	11479.2	22857.1	10866	9344.1	8835.2	8101.5	13422.8	8871.9	18087.1	12200.7	5795.5	24033.2	11836.8	11952.5	11496.9	9012.4	16005.6	10973.4	Acetyl [N-Term]	0.787721	0.823106	0.984644	0.863953	0.86528	0.864941
159	159	4171	P10711	Transcription elongation factor A protein 1 OS=Mus musculus OX=10090 GN=Tcea1 PE=1 SV=2	Tcea1	33.9	8.38	10034	68	437	21	0	9776.6	7216.2	6758.1	9167.1	11850.4	8235.2	9525	6809.9	7250.6	10875.2	6679.6	5343.5	6016.5	7647.9	6593.6	9177.5	7425.6	6682.9	10665.7	13069.2	6154	5889.5	2579.2	7894	6920.5	10418.9	9071.2	7709.4	8548.2	11082		1.13209	0.952357	1.26517	1.17896	1.01902	1.10952
160	160	336	P17182	Alpha-enolase OS=Mus musculus OX=10090 GN=Eno1 PE=1 SV=3	Eno1	47.1	6.8	7044	68	385	24	2	8759.3	7208.5	7150.6	8971.9	4898.7	10537	7076	9461.9	8686.9	8434.7	17177.1	9901.4	10814.1	7435.5	29074	12615.2	5527.6	7846.6	10066.5	7762.5	17120.6	12916.5	34559.4	10074.6	29442.3	8553.9	5283.7	4872.7	5357.8	6408.9		0.514981	0.746707	0.811797	0.616768	0.759825	0.690016
161	161	1989	P70441	Na(+)/H(+) exchange regulatory cofactor NHE-RF1 OS=Mus musculus OX=10090 GN=Slc9a3r1 PE=1 SV=3	Slc9a3r1	38.6	5.9	10898	75	472	26	0	12383.3	11587.9	11535.7	10907.4	12184	12533.1	13798.7	11989.6	11296.6	13575.2	13542.2	15913.6	13575.9	14786.7	11016.1	11903.5	14675.6	12244.3	11996.4	13038.3	14145.3	12612.6	4438.1	14250.2	12234.3	10845.2	13843.2	12211.4	10789	13426.5	Acetyl [N-Term]	1.0185	1.00322	0.865325	0.955066	0.989046	0.966232
162	162	3049	P99027	60S acidic ribosomal protein P2 OS=Mus musculus OX=10090 GN=Rplp2 PE=1 SV=3	Rplp2	11.6	4.54	47648	96	2471	11	0	23671.8	30422	26864.1	34789	71608.5	16939.5	28168.5	23401	26429.1	53725.4	12486	21934.4	18502.6	23938	24012.1	20395.9	34587.5	26050.3	36415.3	74833.5	7007.7	20586	2789	21124.4	24784.5	19694.3	29970.8	24107.5	27348.6	55013		1.03019	1.06398	1.16263	1.03479	1.02397	1.06311
163	163	729	O35601	FYN-binding protein 1 OS=Mus musculus OX=10090 GN=Fyb1 PE=1 SV=2	Fyb1	90	6.98	8119	41	441	30	0	6955.4	5698.8	4166.2	7076.7	8051.2	9900.9	7709.8	6101.6	10294.6	10116	8115	8240.2	5606.7	11087	8453.4	6430.6	5330.7	4971.5	8011.6	7040.6	14331.5	7169.2	3607.9	9169.9	10126.5	8921.3	7332.8	5226.3	8480.9	9199.1		0.856546	0.951101	0.901059	0.82382	0.909361	0.888378
164	164	2726	Q64152	Transcription factor BTF3 OS=Mus musculus OX=10090 GN=Btf3 PE=1 SV=3	Btf3	22	9.52	16045	68	790	14	2	16495.6	26215.6	17218	16761.8	21193.4	11590.9	21449.9	12028.7	14470.9	13918.5	7342.1	14623.7	11054.7	11443.1	5913.4	16669.7	32008.7	14992.3	15987.6	18431.8	3648.1	15511.9	1495.2	9562	5968.7	13622.5	23658	17616.3	14711.2	16308.1		1.46452	1.10294	1.17528	1.01661	1.17169	1.18621
165	165	2211	Q9Z130	Heterogeneous nuclear ribonucleoprotein D-like OS=Mus musculus OX=10090 GN=Hnrnpdl PE=1 SV=1	Hnrnpdl	33.5	7.31	10566	49	652	20	0	14682.5	9034.3	11867.9	14052.1	7222.8	11138.6	8938.4	8718.3	10051.9	5793.7	9251.6	5110.4	8076	9298.1	3031.3	15665.1	9907.8	11326.6	17310.9	8210.2	5528.9	5800.9	2252.8	8843.6	2914	10998.1	7692.8	10287.6	10689	5922.7	Acetyl [N-Term]	1.18	0.860646	0.987386	1.06338	1.02227	1.02274
166	166	2005	E9PV24	Fibrinogen alpha chain OS=Mus musculus OX=10090 GN=Fga PE=1 SV=1	Fga	87.4	6.11	7908	37	359	25	0	4273.5	4597	3654	2776.6	5626.1	5892.2	5388.6	3427.8	3983	4433.9	6479.1	5220.1	4543.1	4148.5	4588.4	5654.1	5125.4	2332.5	5157.6	3984.1	10261.8	5842.2	6897.1	3830.4	3719.4	4889.9	4847.6	3206.2	3572.7	4071.6		0.935352	0.899603	0.829894	0.896987	0.918289	0.896025
167	167	3660	P26645	Myristoylated alanine-rich C-kinase substrate OS=Mus musculus OX=10090 GN=Marcks PE=1 SV=2	Marcks	29.6	4.34	10761	59	292	13	0	2826.6	3109.2	3709.9	2770.5	3603.5	3289.4	3733.7	3076.1	3235.5	3024.2	2203.8	2947.7	2305.5	3302.5	2537.2	3238.2	3685.6	4788.6	2925.7	3071.4	4224.8	3610.1	2323.8	2514.3	2458.1	4494	3936.6	4027.3	3235.1	3031		1.30922	1.05434	1.36621	0.999876	1.00225	1.14638
168	168	2175	Q62418	Drebrin-like protein OS=Mus musculus OX=10090 GN=Dbnl PE=1 SV=2	Dbnl	48.7	4.92	14473	53	635	21	0	12771.6	16379.5	12515.7	11954.1	12314.7	16152.7	19702.6	16707	15914.7	16121.8	16252.4	23384.5	18454.4	21220.5	16861.4	13158	15597.6	14277.7	12819.7	13066.3	23029.6	19554.3	8779	20033.3	19425.4	12080.7	17957.8	13421	14406.6	16205.5		0.803316	0.911443	0.747906	0.905239	1.00519	0.874619
169	169	1475	Q61033	Lamina-associated polypeptide 2, isoforms alpha/zeta OS=Mus musculus OX=10090 GN=Tmpo PE=1 SV=4	Q61033	75.1	8.05	11064	44	394	27	11	5382.3	2037	4316.6	4256.5	4906.4	5793.5	2746.6	4873.7	5281.9	6839.9	4979.6	3079.9	5061.4	5521.6	3424.5	4522.6	2160.1	4756.6	4647.4	6320.3	5303.7	2883.1	1918.4	4479.7	4027.9	6772.1	2819.4	4696.7	4384.6	6156.7	Acetyl [N-Term]	0.963683	1.02651	1.16891	0.830118	0.900115	0.977867
170	170	2615	Q8BP92	Reticulocalbin-2 OS=Mus musculus OX=10090 GN=Rcn2 PE=1 SV=1	Rcn2	37.2	4.42	8746	62	395	19	0	9403.6	5667.8	9051	1685.3	2193.1	10701.1	5829.4	8346.8	4886.5	3583.9	8871.2	5209.2	7415.3	4070.3	6509.5	10729.1	6175.3	9697.6	1056.1	1959.2	10944.2	5616.4	3628.1	6404	6989.3	8154.5	5607.2	9636.9	4566.7	5370.3		1.15456	0.961883	0.762024	0.934554	1.49845	1.0623
171	171	4360	Q3UHX2	28 kDa heat- and acid-stable phosphoprotein OS=Mus musculus OX=10090 GN=Pdap1 PE=1 SV=1	Pdap1	20.6	7.39	12810	59	598	20	0	25748.7	20423.9	18559.7	38955.3	29466	18308.7	17931.1	13648.3	29388.5	22970.4	13986.8	15998.1	12285.7	24586.4	9266.8	20843.2	22552.2	16327.5	40930.8	30691.5	9221.1	13682.2	2119.5	19100.2	9611.5	23497.6	20674.7	16744.8	31428.8	24894.7		1.22688	1.15301	1.28341	1.06943	1.08377	1.1633
172	172	718	P14211	Calreticulin OS=Mus musculus OX=10090 GN=Calr PE=1 SV=1	Calr	48	4.49	8079	69	552	25	0	4315.3	5840.6	5558.6	4811.2	4269.4	12833.3	8103.9	14403.4	7344.8	10136.7	22461.1	18189.6	21189.9	9765.9	32791.3	5870.8	2652.8	7159.2	3479.3	3891.8	32666.7	18686.6	36911.9	18023.2	34778.7	7334.8	5333.2	5123.7	4974.5	9144.2		0.355729	0.658103	0.571544	0.677282	0.902088	0.632949
173	173	4038	P68372	Tubulin beta-4B chain OS=Mus musculus OX=10090 GN=Tubb4b PE=1 SV=1	Tubb4b	49.8	4.89	9230	56	425	18	16	3560.1	2621.6	5961.8	3095.5	2843.2	5203.5	2848.8	7865.8	3494.7	4834	8995.1	4806.1	9693.1	3238.6	14122.4	4375	1458.1	6476.4	2446.2	2970.8	7635	6060.5	25884.8	4884.9	13010.8	4987.3	2273	4598	2634.2	4234.1		0.584556	0.79788	0.958451	0.75377	0.8759	0.794111
174	174	2988	Q00623	Apolipoprotein A-I OS=Mus musculus OX=10090 GN=Apoa1 PE=1 SV=2	Apoa1	30.6	5.73	19990	76	1393	28	0	33684.4	28422.7	49403.5	40665.9	46714.3	33351	25166.4	38045.7	43920.3	17217.3	65150.4	57971.3	66232.2	98143.4	51017	23499.1	26929.6	37974.3	34809.2	40629.6	26566.4	38231.7	13068.6	71677.9	34268.7	30792.2	29966.4	23265.6	29954.5	20171.9		0.611517	1.19073	0.923277	0.682019	1.17161	0.91583
175	175	1804	P56480	ATP synthase subunit beta, mitochondrial OS=Mus musculus OX=10090 GN=Atp5f1b PE=1 SV=2	Atp5f1b	56.3	5.34	7343	67	334	22	0	884.6	855.7	2093.4	1882.5	738.3	2221.5	1072.1	3027.7	2434	1294.8	4750.8	2053.4	4300.7	1949.1	6514	1765.5	438.9	2494.9	1469.4	719.1	5452.8	2870.7	15163.2	3244.5	6117.1	1528.6	704.3	1415.7	1657.8	1046.8		0.467583	0.656935	0.688094	0.681101	0.808465	0.660435
176	176	2736	P61979	Heterogeneous nuclear ribonucleoprotein K OS=Mus musculus OX=10090 GN=Hnrnpk PE=1 SV=1	Hnrnpk	50.9	5.54	16146	55	742	23	0	13549.5	13708.8	13516	11945.5	11984.1	16862.3	15138.8	18599.2	21135.5	21888.3	18211.2	18888.1	20692.1	16789.3	20444.9	13241.4	10385.9	15231.9	11498.6	13409.2	18551.3	19436.9	18289.9	17407.6	20239.6	17776.3	13986.5	16138.1	17299	20423.3	Acetyl [N-Term]	0.867677	0.923884	1.0542	0.818481	0.933069	0.919463
177	177	530	Q9JHU4	Cytoplasmic dynein 1 heavy chain 1 OS=Mus musculus OX=10090 GN=Dync1h1 PE=1 SV=2	Dync1h1	531.7	6.42	1117	14	97	47	0			531.3		59.1	9.6		582.9		71.5	30.4		552.5		115.5	13.2		540.8		57.3	28.1		2169.4		119.8	18.1		487.5		64.5	Acetyl [N-Term]	0.836336	NA	1.88542	NA	0.902098	1.20795
178	178	2200	Q64213	Splicing factor 1 OS=Mus musculus OX=10090 GN=Sf1 PE=1 SV=6	Sf1	70.4	8.98	10007	31	500	18	0	8368.8	7026.3	8509.9	11590.8	11312.3	7947.7	7694.9	8607.6	10460.7	11492.2	5742.4	6402.3	7807.9	10465.6	5258.8	7477	7178.3	8274.2	12948.2	11282.7	4891	6079.9	2520.6	8956.3	5852	8581.2	7584.3	9182.1	10043.9	10743.1	Acetyl [N-Term]	1.06674	0.985627	1.07971	0.960156	0.934817	1.00541
179	179	1241	Q63850	Nuclear pore glycoprotein p62 OS=Mus musculus OX=10090 GN=Nup62 PE=1 SV=2	Nup62	53.2	5.31	10221	32	401	17	0	7868.7	4251.5	6330.8	6220.4	6088.4	6304.2	3831.6	6669.4	6814.8	5895.8	5376	4578	6406.1	6748.2	3647.5	6967.6	3739.7	6434	4690.2	4516	3102.6	3608.9	1503.2	6109	3674.6	6549.9	4261.4	6339.3	6976.8	6657.9	Acetyl [N-Term]	0.950505	1.11217	1.03897	1.02377	1.12926	1.05094
180	180	4155	Q8VEK3	Heterogeneous nuclear ribonucleoprotein U OS=Mus musculus OX=10090 GN=Hnrnpu PE=1 SV=1	Hnrnpu	87.9	6.24	4693	36	396	28	0	5181.2	3908	4666.2	4775.7	3949.4	7444	5801.7	6315.4	9094.8	7126.9	9080.9	8137.1	6326.6	6789.3	8835.1	5736.6	3677.5	5343.8	4579	4899.6	8844.5	7952.1	21552.8	7423.9	8340.7	8098	5161.4	5144.9	6946.8	5771.9	Acetyl [N-Term]	0.814659	0.889636	1.08786	0.763821	0.809875	0.87317
181	181	2123	P09055	Integrin beta-1 OS=Mus musculus OX=10090 GN=Itgb1 PE=1 SV=1	Itgb1	88.2	5.94	9789	35	447	27	0	3531.1	2591.3	3887.2	3380.7	3261.8	5243.1	3211.2	5080.2	3351.9	4514.9	6189.1	4178.7	4953.2	3716.8	8481.8	3483.6	1767.2	4098.4	2332	2964.1	6759.6	4018.2	5261.2	4865.9	7655.3	5035.1	2500.3	4056.6	3597.5	4280		0.798512	0.778619	0.960329	1.07327	0.947972	0.911741
182	182	3985	P99024	Tubulin beta-5 chain OS=Mus musculus OX=10090 GN=Tubb5 PE=1 SV=1	Tubb5	49.6	4.89	9640	53	470	17	2	1067	1108.2	1605.8	2068.8	1084.2	1566.4	1118.5	2175	2429.5	1896.1	2802.8	2005.1	2881.6	2105.6	5080.2	1288.4	649.2	1790.6	1621.9	1268.1	2049	2541.2	6567.6	3644.3	4840.9	1761.6	857.6	1146.8	1602.9	1573.1		0.527264	0.766741	1.12462	0.659765	0.82965	0.781608
183	183	4639	P68368	Tubulin alpha-4A chain OS=Mus musculus OX=10090 GN=Tuba4a PE=1 SV=1	Tuba4a	49.9	5.06	7909	58	383	21	0	345.5	134.4	803	165.3	98.3	765.7	86.1	989	145	197.4	1804.9	99.7	1239.7	110.9	1415.3	652.2	153.8	799.7	107.8	131.4	2242.8	134.4	6253.8	253.5	1152	782.9	76.9	668.1	90.3	155.3		0.675531	0.893148	1.02246	0.622759	0.786727	0.800126
184	184	2144	Q91W90	Thioredoxin domain-containing protein 5 OS=Mus musculus OX=10090 GN=Txndc5 PE=1 SV=2	Txndc5	46.4	5.78	7334	61	319	20	0	3829.8	1751.1	2286.8	1695.7	2072.5	6193.6	2405	4330.5	3237.9	4546.7	9498.2	2858.3	5667.6	4769	5769.5	3966.4	1225.4	3209.2	2110.5	1844.4	9831.7	3012	3129.9	6546.7	7008	3875.5	1532.2	2586.5	2766.5	4398.2		0.597275	0.637089	0.625727	0.854412	0.967339	0.736368
185	185	1006	Q8K4G1	Latent-transforming growth factor beta-binding protein 4 OS=Mus musculus OX=10090 GN=Ltbp4 PE=1 SV=2	Ltbp4	178.5	5.47	3894	29	211	31	0	467.2	376.1	174.1	511.1	429.4	509.1	471.4	186.8	681.9	571.2	435.1	516.6	151.4	590.2	336.9	439.9	386.1	205.9	485.4	412.2	668.4	540	51.6	480.8	350.9	568.7	441	196.9	647.1	483.5		1.05407	0.935511	1.11707	0.948966	0.846464	0.980416
186	186	1795	Q9ERG0	LIM domain and actin-binding protein 1 OS=Mus musculus OX=10090 GN=Lima1 PE=1 SV=3	Lima1	84	6.6	7049	41	355	28	0	5443.3	3468.5	3021.5	2737.6	6175.9	6233.8	5367.5	3957.8	3552.9	8230.2	4551.7	4197.8	3465.3	3355.2	5399.7	5536.7	3229.6	3400.8	3599.5	6234.8	5932.8	4081.5	2303.9	3299.7	6164.3	5923.5	4686	3397.3	3139.6	7115.2		0.858381	0.873032	0.950223	0.883672	0.864523	0.885966
187	187	1347	Q921M4	Golgin subfamily A member 2 OS=Mus musculus OX=10090 GN=Golga2 PE=1 SV=3	Golga2	113.2	5	4772	43	230	29	0	677.7	505.1	566.5	677.9	748.9	1031.1	688.8	1043.3	1099.9	1143.6	904.5	978.2	995.2	1190.4	899.6	668	333.6	668.7	650.8	664.6	1010	884.7	801	1276.8	964.7	860.5	671.2	743	1036.3	1070.3		0.712163	0.974448	0.834546	0.942177	0.935904	0.879848
188	188	4421	O54931	A-kinase anchor protein 2 OS=Mus musculus OX=10090 GN=Akap2 PE=1 SV=3	Akap2	98.5	5.21	5226	35	277	27	0	2084.6	2919.6	2258.6	2702.6	2489.9	2524.9	3413.4	2682.6	3326.5	3270.4	2148.2	3489	2416.2	3594.5	2289.5	2185.1	3077.4	2413.4	3055.9	2569	3060	3152.3	1910.5	3542.6	2796.8	1985.5	3412.4	2566.6	3087.7	2758.9	Acetyl [N-Term]	0.956758	0.999707	0.786368	0.928213	0.843597	0.902929
189	189	1521	Q80WT5	Aftiphilin OS=Mus musculus OX=10090 GN=Aftph PE=1 SV=2	Aftph	101.1	4.5	4148	42	197	26	0	770	633.8	718.2	1152.2	647.4	751.8	732.1	705.1	1522.3	588.1	676.8	662.6	766.2	1479.2	480	783.7	756.7	663.7	1175.3	527.9	614.7	705.3	333.3	1282.4	456.1	736.7	716	755.1	1373.1	596.8		1.07091	0.978008	0.979915	0.90199	1.01479	0.989124
190	190	803	Q9ERB0	Synaptosomal-associated protein 29 OS=Mus musculus OX=10090 GN=Snap29 PE=1 SV=1	Snap29	29.6	5.38	7288	74	357	25	0	5810.8	7159	7020.9	8335.9	9549.1	5530.7	6784.1	5992.9	7301.3	8142.8	5359.8	7850.5	6808	9661.3	6744.1	5419.5	8144.7	7300.4	7844.3	8566	5202	6509.3	2375.7	7555.9	6963.2	5681.1	7865.8	7505.1	7617.4	8750.5		1.25233	1.15945	1.02719	1.04329	1.07463	1.11138
191	191	1647	P97315	Cysteine and glycine-rich protein 1 OS=Mus musculus OX=10090 GN=Csrp1 PE=1 SV=3	Csrp1	20.6	8.57	16917	68	918	14	0	14008.9	11805.8	16796.5	16150.8	14919.9	14425.2	16981.6	16379.1	19153.4	18190.2	11993.9	10081	14073.5	21199.9	12015.8	13204.7	13481.9	16479.2	19264	16179.4	17517.1	11070.6	7253	20611.5	12946.7	16096.1	15515.1	17099.1	18878	15809.7		1.04396	0.913642	1.11583	0.985621	0.869133	0.985637
192	192	2008	Q91YE8	Synaptopodin-2 OS=Mus musculus OX=10090 GN=Synpo2 PE=1 SV=2	Synpo2	116.5	7.37	4439	43	222	31	0	1345.5	590.7	702.2	965.8	771.6	1483.3	926	820.8	1641.9	1376.7	1384.7	1149.2	855.7	2083.8	1522.3	1205.9	629.6	786.7	1139.2	822.3	2181.9	1009.5	735.5	1645.5	1741	1526.4	962.1	909.1	1404.6	1199.5		1.10758	1.03898	1.02906	0.855472	0.871286	0.980476
193	193	1465	P97868	E3 ubiquitin-protein ligase RBBP6 OS=Mus musculus OX=10090 GN=Rbbp6 PE=1 SV=5	Rbbp6	199.5	9.63	3222	25	281	43	0	2624.9	3256	3438.6	1909.9	2611.2	2520.5	3504	3180	2222.8	2764.7	2165.1	2995.9	2854.7	2113.7	1628.4	2652.9	3273.1	3721.1	2051.2	2863.4	1505.1	3436.4	1365.8	1817.8	1773.5	2927.7	3557.3	3587.1	2179.5	2746.9		1.12802	1.01521	1.16156	0.98052	0.993562	1.05577
194	194	2182	Q9QXD8	LIM domain-containing protein 1 OS=Mus musculus OX=10090 GN=Limd1 PE=1 SV=2	Limd1	71.4	6.32	4521	52	241	23	0	870.9	688.3	1272.8	1311.4	1400.7	862.7	841.9	1385.8	1242	1392.1	840.9	737.3	1412.6	1547.1	1136.8	835.8	730.9	1366.6	1400.9	1314.4	810.3	743	768	1269.3	1231.1	878.8	770	1273.1	1253.9	1347.3	Acetyl [N-Term]	0.918675	0.914598	1.01866	1.00958	0.967818	0.965867
195	195	3741	Q6NZF1	Zinc finger CCCH domain-containing protein 11A OS=Mus musculus OX=10090 GN=Zc3h11a PE=1 SV=1	Zc3h11a	86.4	8.13	3746	41	223	25	0	1237.3	969.2	700.7	978.8	1215.2	1475.7	1235.4	1014.8	1534.6	1597.2	1066.9	1034.2	878.3	1107.3	982.3	1232.5	963.9	817.8	994.1	1238.7	910	1031.4	646.3	975.6	1115.5	1435.5	1100.5	885.2	1383.7	1529.6		0.87229	0.890805	0.972759	0.901668	0.957676	0.91904
196	196	4041	O08539	Myc box-dependent-interacting protein 1 OS=Mus musculus OX=10090 GN=Bin1 PE=1 SV=1	Bin1	64.4	5.03	5087	52	289	26	2	4121.9	3187	2825.9	1685.8	2405.4	5084.5	3364.1	4357.2	2580.9	3363.8	4981.7	4412.1	4634.4	3170	5669.7	3275.8	3154.4	2877.5	1872	2452.2	6022.5	3196.9	5233.3	2914.5	4960.3	4831.2	3520.3	3933.2	2733.5	3655.6		0.90269	1.04643	0.950182	1.05913	1.08675	1.00904
197	197	1987	Q03265	ATP synthase subunit alpha, mitochondrial OS=Mus musculus OX=10090 GN=Atp5f1a PE=1 SV=1	Atp5f1a	59.7	9.19	9989	53	416	25	0	2430	3745.3	4517.7	3131.2	2693.2	4389.5	4597.8	5649.5	3589.8	4222.1	7559.4	5763.1	6783.7	2684.8	12940.6	4004.9	3378.4	5154.1	2986.2	3189.2	7501.9	7296.7	28077.5	3937.5	12194.5	3635	3783.3	3761.2	2581.3	3594.6		0.665758	0.82285	0.828113	0.719065	0.851377	0.777433
198	198	2272	P02088	Hemoglobin subunit beta-1 OS=Mus musculus OX=10090 GN=Hbb-b1 PE=1 SV=2	Hbb-b1	15.8	7.65	83085	69	6275	10	1	47083.7	84297.9	72570.1	74931.9	147112	37087.5	48500.4	56883	41622.5	84828	64638.2	86478.5	67683.1	71905.9	225250	36739.6	91257	64617.9	61709.5	108661	61470.1	77198.5	162098	46263	153933	59325.2	69482.5	80785.2	57099.5	115386	Acetyl [N-Term]	1.4202	1.43262	1.5996	1.37184	1.36023	1.4369
199	199	2577	Q7TQH0	Ataxin-2-like protein OS=Mus musculus OX=10090 GN=Atxn2l PE=1 SV=1	Atxn2l	110.6	8.85	5831	27	319	25	1	6355.1	4037	3729.3	5041.6	6484.5	5946.1	5045.4	3488.1	3940.6	5561.3	4235.5	4263.7	3384.4	4538.8	3241.1	6285.9	5431	4087.5	5951.5	6283.8	3517.4	4086.3	1752.9	3283.5	3439.7	6550.8	4847.9	3857.1	3942.8	5220.5		1.10579	0.960855	1.1017	1.00056	0.938719	1.02152
200	200	199	Q60668	Heterogeneous nuclear ribonucleoprotein D0 OS=Mus musculus OX=10090 GN=Hnrnpd PE=1 SV=2	Hnrnpd	38.3	7.81	11005	44	764	22	1	26444.3	11147.8	12738.9	32665.9	22013	18883.1	13147.1	14362.6	23746.2	19224.5	14039.2	8352.8	13419.4	18322.4	9038	23882	13511.7	12477.2	36392.3	29036.1	14172.7	7897.1	6945.9	17787.8	11070.6	20222.3	11704.4	13389.9	24446.5	18618.4		0.932275	0.890265	1.07092	1.02949	0.968473	0.978285
201	201	3093	Q9JLQ0	CD2-associated protein OS=Mus musculus OX=10090 GN=Cd2ap PE=1 SV=3	Cd2ap	70.4	6.38	5885	50	416	29	0	9128.8	5076.8	4466.1	7943.7	6802.5	11168.9	6570	6183.4	10878	11075.7	10170.5	8567.3	6511.6	15715.5	10326	8475.4	4633.3	5662.2	10700	6989.7	14407.9	7155.9	4121.7	12241.4	12482.1	12535.8	5535.5	4809.4	9371.3	10446.1	Acetyl [N-Term]	0.777792	0.842542	1.12238	0.861491	0.943155	0.909473
202	202	3453	P40124	Adenylyl cyclase-associated protein 1 OS=Mus musculus OX=10090 GN=Cap1 PE=1 SV=4	Cap1	51.5	7.52	4932	61	270	22	0	1890.6	694.7	2627.8	952.4	885.3	2904.7	878.8	3368.1	1173.9	1421.9	5490	1681.6	4094.2	1136.4	6629.5	2407.1	450.7	2999.7	1005.5	832.8	10109.7	2285.9	24887.5	1760.7	6601.3	2391.7	642.8	2541.4	1005.5	1252.2	Acetyl [N-Term]	0.75455	0.731452	0.82339	0.856547	0.880653	0.809318
203	203	2399	Q60710	Deoxynucleoside triphosphate triphosphohydrolase SAMHD1 OS=Mus musculus OX=10090 GN=Samhd1 PE=1 SV=2	Samhd1	72.6	7.96	2417	56	178	29	0	486.3	120.2	1166.3		161.6	763.2	171.5	1464.3		255	1461.3	277.4	1713		1384.3	585.1	116.5	1335.5		138.2	2739.1	320.6	17280.7		1624.9	607.7	121.2	1196.1		205.9	Acetyl [N-Term]	0.816841	0.706706	0.796253	NA	0.807451	0.781812
204	204	1037	Q61624	Zinc finger protein 148 OS=Mus musculus OX=10090 GN=Znf148 PE=1 SV=2	Znf148	88.7	6.48	5210	37	244	21	0	2328.5	1611.3	1364.4	1479.9	1515.4	1820.6	1554.1	1061.8	1330.3	1444.1	1673.2	1229.4	1079.3	1568.9	722.6	2116.6	1674	1312.8	1551	1585.9	1112.1	1265.7	591.1	1272.1	770.7	1813	1472	1172.7	1537.1	1573.4	Acetyl [N-Term]	1.10445	0.947172	0.995826	1.15545	1.08954	1.05849
205	205	1776	P48678	Prelamin-A/C OS=Mus musculus OX=10090 GN=Lmna PE=1 SV=2	Lmna	74.2	6.98	6833	48	349	35	0	1529.1	1392.5	1637.6	1294.9	1446.2	2225.3	3164.7	3396.8	3526	3215.9	1744.7	2024.8	2277.8	994.2	2660.7	2307.4	1401.6	2606.1	1310.7	2220.1	2960	3202.8	6081.9	2614.8	2524.4	2448.4	1980.5	1890	1985.6	1927.8		0.556406	0.62581	1.10026	0.563131	0.599459	0.689012
206	206	2957	Q9Z0H8	CAP-Gly domain-containing linker protein 2 OS=Mus musculus OX=10090 GN=Clip2 PE=1 SV=2	Clip2	115.8	6.48	3779	34	222	34	0	309.2	56.6	156.8	289.2	67.9	350.4	84.7	216.3	342	99.4	278.4	116.9	249.9	392.2	104.8	220.7	50.6	204.7	260	53.8	394.8	92.3	218.5	387.7	91.3	355.9	80.8	215	295.4	90.3		0.99399	0.953955	1.0157	0.863743	0.908451	0.947167
207	207	2515	Q6R891	Neurabin-2 OS=Mus musculus OX=10090 GN=Ppp1r9b PE=1 SV=1	Ppp1r9b	89.5	4.92	5452	38	279	29	1	3031.8	2216.8	2424.1	2844.3	2211.9	4012.9	2844.7	3256.2	4214	2578.7	3097.4	3310.7	2910.3	4020.3	1976.2	2956	1609.7	3034.6	2659	1846.6	4739.8	2697.3	1548.6	3954	2548.6	3834.2	2893.9	3307	4062.9	2706.3		1.0156	1.0173	0.955469	0.964143	1.04948	1.0004
208	208	3753	Q80YR7	Claspin OS=Mus musculus OX=10090 GN=Clspn PE=1 SV=2	Clspn	146.6	4.79	3684	31	205	28	0	1916.5	2470.7	1791.2	1802.1	679.5	1344.1	1572.6	1200.4	1299.4	426.8	1049.7	1564.9	1229.1	1209.5	247.7	1541.6	2394.9	1218.8	1832.2	482.7	427.3	1111.4	247.2	1107.3	204.1	1645.3	2538.9	1956.9	2052.4	578.1	Acetyl [N-Term]	1.63021	1.61446	1.22409	1.5795	1.3545	1.48055
209	209	2378	Q5SXY1	Cytospin-B OS=Mus musculus OX=10090 GN=Specc1 PE=1 SV=2	Specc1	118	6.64	4912	38	324	35	2	2732.1	1915.4	1565	3893.5	7233.6	1874.2	2022	1250.8	2207.6	4170.3	1276.2	1664.6	948.9	1828.6	2530.7	2212.1	1782.4	1305.3	2795.9	6923.5	1568.7	1595	782	1632.4	2507.1	3410.2	2440.4	1850	3165.9	4593.1		1.47905	1.20692	1.81955	1.43409	1.10138	1.4082
210	210	3792	P18760	Cofilin-1 OS=Mus musculus OX=10090 GN=Cfl1 PE=1 SV=3	Cfl1	18.5	8.09	10545	80	883	21	3	14146	16103.4	11559.1	19598.4	11378.2	21937.7	16653.9	22138.4	28396.2	17399.8	24383.1	28578.6	35777.1	32035.9	42859.6	15924.7	12085.6	12844.5	18214.6	10188.9	47388.1	26109.2	43278.8	38983.4	49947.9	15422.5	15429.1	13208.6	24701.7	17424.5	Acetyl [N-Term]	0.596638	0.926456	0.703014	0.869895	1.00142	0.819484
211	211	757	P08228	Superoxide dismutase [Cu-Zn] OS=Mus musculus OX=10090 GN=Sod1 PE=1 SV=2	Sod1	15.9	6.51	32434	68	1878	16	0	46115.7	60181.3	51993.1	72383.7	75686.4	43732.1	62125.6	50160	55245.2	57748.5	35511.2	66273.9	45847.3	60387.4	38292	43700.2	70228.1	51121.1	67756.3	74817.9	45098.1	53192.8	14494.4	61293.7	45833.8	42161.5	67997.2	54985.2	58050.4	60218.7		1.0962	1.09451	0.964086	1.05078	1.04278	1.04967
212	212	1251	P10126	Elongation factor 1-alpha 1 OS=Mus musculus OX=10090 GN=Eef1a1 PE=1 SV=3	Eef1a1	50.1	9.01	8109	54	624	21	0	9577.8	11911.9	18226.7	11541.2	5068.4	17483.7	11766.5	19795.6	14077.4	9849.9	34796	19549.9	23937.5	9760.5	39504.8	17507.3	6230.3	21893.3	9111.5	6860.7	30129.6	29026.3	73407.1	17948.9	36453.2	17383.9	9446.3	11533.2	8397.8	7805.3		0.582614	0.802813	0.994292	0.596545	0.792424	0.753738
213	213	1228	Q9JLV1	BAG family molecular chaperone regulator 3 OS=Mus musculus OX=10090 GN=Bag3 PE=1 SV=2	Bag3	61.8	7.27	4689	62	294	28	0	6190.7	3378.9	3407.4	4999.6	4463.1	5312.1	3581.3	3160.3	5000.7	4585.3	4142.1	3139.9	2870	4791	2325.2	5799.7	3794.9	3399	5859.3	4652.3	3638	3069.8	816.7	4430.7	2565.5	5561.6	4076.8	3661.6	5022.9	4294.6		1.15862	1.13836	1.04697	1.00444	0.936602	1.057
214	214	257	P29351	Tyrosine-protein phosphatase non-receptor type 6 OS=Mus musculus OX=10090 GN=Ptpn6 PE=1 SV=2	Ptpn6	67.5	7.81	2449	54	137	28	0	483.3	89.6	1638.3		340	728.1	113.9	1949.5		458.1	1038.5	236.1	2145.8		971.2	653.1	52.5	1837.4		404.1	1499	251.9	11650.6		998.4	750.8	89.9	1631.8		405		0.837035	0.789289	1.03118	NA	0.884086	0.885397
215	215	4542	Q640M1	U3 small nucleolar RNA-associated protein 14 homolog A OS=Mus musculus OX=10090 GN=Utp14a PE=1 SV=1	Utp14a	87.2	9.2	3699	38	237	27	0	1840.3	3675	1859.1	1111.3	575	1643.6	2841.1	1866.9	1873.9	887.9	1534.8	2584.7	1920.8	1587	507.9	1835.5	2998.5	1801.6	1114	608.9	735.4	2961	512.5	1437.9	468.6	1852.6	3170.5	2006	1743.9	967.7		1.07451	1.11594	1.12716	0.930626	1.08987	1.06762
216	216	2810	Q99020	Heterogeneous nuclear ribonucleoprotein A/B OS=Mus musculus OX=10090 GN=Hnrnpab PE=1 SV=1	Hnrnpab	30.8	7.91	19062	55	1198	21	0	26730.7	14597.4	22662.5	47681.8	27644.5	16673.2	13522	17070.3	32189.1	18123.6	12650.8	8472.2	15509.5	25583.5	5871.9	23581.6	18343.8	22330.5	49388.3	30918.1	6330.9	8405.3	3638.1	23973	5897.7	20752.2	13290.3	20243.1	35252.7	19591.6		1.18587	0.982865	1.24464	1.09518	1.081	1.11791
217	217	1553	Q61464	Zinc finger protein 638 OS=Mus musculus OX=10090 GN=Znf638 PE=1 SV=2	Znf638	218	6.89	2698	17	196	29	0	1309.9	1135.5	583.7	1489.1	1449.9	1543.8	1424.5	627.9	1805	1794.9	1336.2	1428.5	639.2	1699.4	1011.5	1407.4	1169.8	696.8	1696.3	1536.1	1368.7	1427.5	406.7	1429.1	1150.2	1645.1	1416.7	729.2	1762.5	1632.4		1.16133	0.994524	1.06562	0.976454	0.909466	1.02148
218	218	1857	Q62351	Transferrin receptor protein 1 OS=Mus musculus OX=10090 GN=Tfrc PE=1 SV=1	Tfrc	85.7	6.57	4932	36	259	25	0	4383.3	4527.6	6396.6	4206.1	4353.1	4397.1	2791.5	4871.6	1692.6	1743.1	2521.6	1578.1	3315.7	1019	1026.5	5752.3	3205.7	5651.4	2364.6	3058.9	2083.4	2375.2	1838.7	1449.4	732.2	7672.3	2817.5	5890.7	2123.4	2007.5		1.20919	1.00931	1.74485	1.25452	1.15168	1.27391
219	219	2871	Q80WJ7	Protein LYRIC OS=Mus musculus OX=10090 GN=Mtdh PE=1 SV=1	Mtdh	63.8	9.33	6779	51	327	28	0	2570.4	2051.1	2886.8	2254.4	3424.3	3056.3	2707	2508.2	2575	4590.1	2791.5	2585.9	2320.4	2606	3146.5	2960	2276	3511.4	2577.7	3666	3320.9	2471.2	1445.9	2388.8	3395.7	3277.3	2366.6	2956.1	2083.4	4024.5		1.17857	0.874252	1.07231	0.809087	0.876778	0.9622
220	220	1868	P83741	Serine/threonine-protein kinase WNK1 OS=Mus musculus OX=10090 GN=Wnk1 PE=1 SV=2	Wnk1	250.8	6.43	3668	18	274	34	0	3536.2	3755.4	3435.8	2713.2	4048.5	3384.8	4733.3	3250.3	2714.1	3932.3	2675	4753.9	3001.5	2867.8	2623.9	3318.1	4450.7	3973.2	3129.1	3619.1	3092	4319.7	1383.6	2289.2	3009.2	4279.9	4875.8	3844.6	2664.2	3658.1		1.18284	1.03011	1.26445	0.981615	0.93027	1.07786
221	221	2469	O54824	Pro-interleukin-16 OS=Mus musculus OX=10090 GN=Il16 PE=1 SV=3	Il16	141.3	7.78	4494	24	247	24	0	3704.6	2468.4	1602.5	1722.5	3304	4303.6	3252.6	2021.2	2253.8	4205.8	4029.5	3775.2	1981.1	2823	3939.3	3458.7	2845.4	2083.6	2186.2	3558.2	6678.6	2929.2	2885.8	2383.2	4905	4178.5	2863.9	1903.7	1881.6	3665.2		0.941866	0.880496	0.970931	0.834857	0.871463	0.899923
222	222	4085	Q91XV3	Brain acid soluble protein 1 OS=Mus musculus OX=10090 GN=Basp1 PE=1 SV=3	Basp1	22.1	4.51	6536	87	224	17	0	2935.7	2242.1	2751	2768	5403.7	3960	2823.2	2868.9	2874	5083.1	3064.7	2754.4	2064.2	2870.2	3329.1	2835	2207.9	3733.7	2455.1	5060.7	5897.9	2829.8	2483.6	2320.1	3880.1	4618	2876.2	3348.2	2748.1	4488.1		1.16707	1.01877	1.16616	0.956193	0.882945	1.03823
223	223	1115	Q9JJ11	Transforming acidic coiled-coil-containing protein 3 OS=Mus musculus OX=10090 GN=Tacc3 PE=1 SV=1	Tacc3	70.6	4.61	6259	42	360	27	0	7139.1	8006.6	4949.1	6240.7	8476.5	5093.4	5530.1	3436.3	3885	4796.9	4286.5	6565.7	3635.7	4399.2	2985.5	5793.6	6618.9	3647.8	5223.6	5297.9	1560.5	4828	977.5	3106.8	2535.1	5970.2	8190.1	4715.3	5397.2	6044	Acetyl [N-Term]	1.3722	1.481	1.17214	1.38924	1.25998	1.33491
224	224	865	Q9CR41	Huntingtin-interacting protein K OS=Mus musculus OX=10090 GN=Hypk PE=1 SV=2	Hypk	14.7	4.93	8124	55	387	10	0	5300.3	4370.7	4249	2731.2	5538.6	4272.1	3799.2	3453.4	2081.9	4723.5	3074.4	3064.7	3294.5	2028.2	2312.2	4484.8	4978.8	4246.6	2779.9	5934.1	1902.6	3100	858	1761.6	2597.4	4854.6	3783.6	3959.3	2255.7	4735		1.14649	0.995894	1.13635	1.08348	1.00243	1.07293
225	225	622	P55302	Alpha-2-macroglobulin receptor-associated protein OS=Mus musculus OX=10090 GN=Lrpap1 PE=1 SV=1	Lrpap1	42.2	7.87	8808	55	395	25	0	10298.9	10216	8096.3	7677.3	10859.6	11851.2	12047.9	9385	8852.1	10454.9	8132	11093.8	7326.7	8104.2	6590	10357.2	8840.8	8779.2	8027.4	8838.7	9670.4	10479.1	4265.5	8310.1	7315.5	10284	11615.3	9015.5	8148.4	10114.1		0.960629	0.964093	0.86776	0.920505	0.967403	0.936078
226	226	4439	P63101	14-3-3 protein zeta/delta OS=Mus musculus OX=10090 GN=Ywhaz PE=1 SV=1	Ywhaz	27.8	4.79	11267	70	435	18	2	1880	2045.8	2326.4	2056.9	1565.3	4465.8	2520.6	4178.2	2428.4	2980.1	8990.5	5575.3	6218.3	2713.9	14453.5	2937.6	925.4	3051.7	1687.6	1783.5	17183	7085.5	22402	4311.2	14610.9	3320.2	1627.3	2205.7	1688.8	2671	Acetyl [N-Term]	0.527907	0.6456	0.743473	0.695437	0.896279	0.701739
227	227	100	Q9WV92	Band 4.1-like protein 3 OS=Mus musculus OX=10090 GN=Epb41l3 PE=1 SV=1	Epb41l3	103.3	5.31	5194	32	268	25	2	4982.4	3400.5	3289.7	2688.1	6415.1	4867.1	4433.9	3470.4	2826.5	6226.2	4077.4	4674.3	3034.1	3141.7	4113	4600.5	3864.8	4104.4	2805.3	6404.5	5438.7	4486.7	1643.3	2595.4	4859.9	6135.8	4162	3978.1	2387	5826.1		1.14629	0.938677	1.26067	0.844507	0.935739	1.02518
228	228	2314	Q810V0	U3 small nucleolar ribonucleoprotein protein MPP10 OS=Mus musculus OX=10090 GN=Mphosph10 PE=1 SV=2	Mphosph10	78.7	4.87	3443	37	255	28	0	2885.1	5275.2	4570.4	872.3	676.5	2915.7	4585.6	4999	2306.7	1295.4	3243.1	4290.6	5286.6	1747.6	973	2878.1	5194.9	4568.2	841.3	705.2	1309.6	4460.2	1039.6	1943.6	1020.3	3238.7	5437	5150.5	2298.6	1425		1.03031	1.18567	1.11078	0.996488	1.10005	1.08466
229	229	3670	O55042	Alpha-synuclein OS=Mus musculus OX=10090 GN=Snca PE=1 SV=2	Snca	14.5	4.77	12321	89	530	13	0	31297	24747.4	24215.2	61930.1	37169.6	19591.6	18580.5	22683.2	26871.7	15876.5	14981.4	29470.8	16986.3	30254.2	13267.9	18647.9	27740	18813.1	39454.5	31492.2	12645.9	16572.1	3334	19913.4	11350.7	36137.1	33515.9	29581.9	38776.2	23268.2		1.30413	1.80382	1.84452	1.44301	1.46557	1.57221
230	230	223	Q8BI84	Transport and Golgi organization protein 1 homolog OS=Mus musculus OX=10090 GN=Mia3 PE=1 SV=2	Mia3	213.5	4.75	2832	20	172	32	0	1072.6	808.2	380.7	365.3	761	1289.9	995.5	469.3	399.1	857.7	1192.1	1009.1	453.2	463.8	574.5	1008.4	950.8	417.1	384.6	633.3	1225.4	949.6	284.8	409.3	703.9	1191.3	928.5	439.7	409	724.5		0.936927	0.932697	0.92356	1.02481	0.844701	0.932538
231	231	933	P26040	Ezrin OS=Mus musculus OX=10090 GN=Ezr PE=1 SV=3	Ezr	69.4	6.1	5358	48	339	31	1	1838	956	1621.2	2359.8	1529.9	2653.4	1235.8	2130.1	2367.5	2402	3989.7	1819.4	2253.5	2197.8	3823.8	2357.9	982.8	1942.4	2045.5	1703	4734.1	1761.4	7461.1	2359.4	3938.4	2677.3	1119	1723.2	2134.1	1950.3		0.808976	0.905486	1.00901	0.901415	0.811948	0.887367
232	232	2275	P54728	UV excision repair protein RAD23 homolog B OS=Mus musculus OX=10090 GN=Rad23b PE=1 SV=2	Rad23b	43.5	4.83	12484	51	584	18	2	17210	15297.9	17767.7	22829.6	16241.6	15710.8	16807.4	18164.5	22041.1	16189.6	12883.2	17415.3	17687.4	23604.5	9732.5	15341	16960.6	17384.8	25039.1	16981.3	11534.3	13937.2	4420.1	20253.4	10820.5	14678.2	16793.4	18015.4	21287.1	16739.1		0.991792	0.999167	0.934275	0.965791	1.03394	0.984993
233	233	3519	Q8BG05	Heterogeneous nuclear ribonucleoprotein A3 OS=Mus musculus OX=10090 GN=Hnrnpa3 PE=1 SV=1	Hnrnpa3	39.6	9.01	12582	49	508	22	0	5251.3	5076.8	5502.2	6799.9	5582.9	6097.4	8680.8	6963.9	9185.9	7908.5	9165.2	7762.6	7065.4	7030.9	6316.9	7008.9	4585.8	8967.9	8132.7	7140.5	8022.1	9084.1	11575.2	9511.1	7687.4	5199.4	5484.1	4927.2	6487.1	6309.8		0.707535	0.631751	0.852724	0.706202	0.79785	0.739212
234	234	1768	Q7TNE3	Sperm-associated antigen 7 OS=Mus musculus OX=10090 GN=Spag7 PE=1 SV=1	Spag7	25.9	7.43	6289	74	352	21	0	8445.1	5929.8	5923.1	7545	9210.6	7541	6191.8	4891.7	6748.6	8698.8	5808.1	4870.9	4583	7207.5	4675.7	8067	6236.8	5644.6	7729.8	9335.6	4120.6	4806.2	1428	5641.7	4845.4	7333.6	5954.6	5793	6978.3	9083.6	Acetyl [N-Term]	1.18425	0.961691	0.972497	1.03404	1.04424	1.03934
235	235	3832	Q80XU3	Nuclear ubiquitous casein and cyclin-dependent kinase substrate 1 OS=Mus musculus OX=10090 GN=Nucks1 PE=1 SV=1	Nucks1	26.3	5.14	6575	60	307	19	0	5606.3	10389.7	6797.6	10480.2	7999.1	5847.3	12894.3	6075.7	11627.9	7328.9	4410	9406.4	4662.7	10362.9	4609.3	6238.5	14021.8	7467.9	10957.1	9452.1	4604	9855.7	1701.6	11782.2	4546.5	5685.3	11681.7	7533.2	10125.1	6939.7		1.23989	0.905958	0.972295	0.870759	0.946895	0.98716
236	236	4630	P21619	Lamin-B2 OS=Mus musculus OX=10090 GN=Lmnb2 PE=1 SV=2	Lmnb2	67.3	5.5	4580	48	286	29	0	1249.2	623	664.1		743.5	1452.4	944.8	1045.9		1319.8	1950.6	1509.3	1427.2		1934.8	1279.7	566.3	959.5		896.9	2263.2	1413.3	2101.3		2204.2	1229.4	771	788.4		1085.2		0.753801	0.816046	0.846461	NA	0.822246	0.809638
237	237	1543	Q8BKI2	Trinucleotide repeat-containing gene 6B protein OS=Mus musculus OX=10090 GN=Tnrc6b PE=1 SV=2	Tnrc6b	191.8	6.3	4848	20	194	25	0	451.1	894.1	592	1543.6	2757.7	361.7	918.7	538.6	1013.2	1669.9	284.4	932.3	529.7	940.5	953.8	381.1	952.7	628.7	1542.1	2611.6	307.8	788	252.9	772.6	1035.1	528.9	1064	697.7	1156.1	1721.2		1.2954	1.15816	1.46226	1.14104	1.03072	1.21751
238	238	3163	O88522	NF-kappa-B essential modulator OS=Mus musculus OX=10090 GN=Ikbkg PE=1 SV=2	Ikbkg	47.9	5.85	6072	52	332	22	0	6017	4545.5	3120.1	4402.6	4083.8	5718.5	4669.4	3123.6	3957.9	3956.4	5254.7	4833	3007.4	4775.3	3076.1	5839.9	4913.5	3426.1	4196.4	4001.3	5782.6	4097.8	1292.6	4144.5	3436.9	5122.1	4778.3	3291.4	3871.5	3965		1.05372	1.02332	0.895707	0.97817	1.00217	0.990619
239	239	2477	Q6ZQ03	Formin-binding protein 4 OS=Mus musculus OX=10090 GN=Fnbp4 PE=1 SV=2	Fnbp4	111.2	4.73	6522	24	286	25	0	3735.6	3579.7	2338.3	970.4	2327	3159.3	3614.1	2295.2	955	2101.9	2669.7	3528.7	2098.9	1091.1	1754.4	3759.3	3069	2334.4	1011.4	2420.7	1854.9	3282.8	826.2	779.5	1674.5	2984.2	3434	2320.5	1017.1	2139.2		1.01102	0.950167	0.944576	1.06503	1.01775	0.997708
240	240	1288	Q8R1N0	Zinc finger protein 830 OS=Mus musculus OX=10090 GN=Znf830 PE=1 SV=1	Znf830	40.6	5.4	7461	63	327	23	0	5186.2	4737.1	6094.1	6127.4	9505.1	3755.9	4638.6	4436.7	4419	7131	2941.5	3047.5	3576.5	4483.7	2819.2	4688.8	5463.3	5710.7	6441.1	9916.3	1913	3004	945.9	3595.6	2938.8	4511	4710.5	5709.2	5078	7344.2		1.28681	1.0155	1.20104	1.14913	1.0299	1.13648
241	241	638	Q3TIV5	Zinc finger CCCH domain-containing protein 15 OS=Mus musculus OX=10090 GN=Zc3h15 PE=1 SV=2	Zc3h15	48.3	5.3	6275	56	356	27	0	6111.7	8385.7	5054.5	4377.5	4807.3	5374	7926.4	4670.9	5292	5039	4518.9	5884.6	4964.1	4766	2771.5	6445.8	6894.7	4897.9	4733.7	4897.2	2538.8	6499.8	1100.1	4409.2	2718.2	5750.1	7898.4	4929.7	5465	5553.8		1.05541	0.996468	1.06999	1.03269	1.10216	1.05134
242	242	4449	P62259	14-3-3 protein epsilon OS=Mus musculus OX=10090 GN=Ywhae PE=1 SV=1	Ywhae	29.2	4.74	5962	73	317	21	4	2470.7	3126.4	3500.6	1997.1	1697.2	4741.6	3352.3	4681.1	2595.8	3381.2	8335.1	5518.1	6568.3	2273.5	16305.8	3617.1	1774.3	3993.1	1558.1	1833.7	12965.8	7804.7	22941.6	4539	15134.7	3183.4	2441.7	2888.8	1673.9	2827.3	Acetyl [N-Term]	0.61712	0.728366	0.671377	0.644849	0.836182	0.699579
243	243	1881	P07759	Serine protease inhibitor A3K OS=Mus musculus OX=10090 GN=Serpina3k PE=1 SV=2	Serpina3k	46.9	5.16	8286	32	432	14	3	2956.9	1579.4	3146.5	2242.7	2062.2	5692.8	1481.6	6619.8	3839.7	3420.1	11443.3	2997.8	10861.4	7641.6	11374.6	2569.5	943.7	2286.6	1827.5	1172.5	16749.9	5454.6	6871.6	10672.1	8184.6	3714.9	1048.9	3814	3170.1	3647.8		0.57615	0.707951	0.652561	0.825611	1.06658	0.76577
244	244	2103	Q60953	Protein PML OS=Mus musculus OX=10090 GN=Pml PE=1 SV=3	Pml	98.2	5.63	5300	40	269	25	0	1518.7	792.7	1981.1	553.6	1004.4	2015.4	934.6	2794.1	766.8	1458.1	2993.7	2204.7	3215.8	1122.8	2689	1385.1	546.1	2161	565.8	1073.2	2783.9	1678.4	4817.9	1294.9	2721	1791.1	802.3	2158.3	675.4	1556.7	Acetyl [N-Term]	0.772449	0.858442	0.888707	0.880803	1.06762	0.893605
245	245	4269	P42567	Epidermal growth factor receptor substrate 15 OS=Mus musculus OX=10090 GN=Eps15 PE=1 SV=1	Eps15	98.4	4.6	2632	50	188	27	0	920.1	730.4	949.2	198	653.5	1017.9	910.8	978.6	162.9	618.3	890.7	804.5	871.5	171.2	507.2	1190.5	753	1097.6	152.7	650.5	1244.1	885.1	928.3	128.6	515.4	1129.3	818.8	1247.8	156.1	560.7	Acetyl [N-Term]	1.27509	0.89899	1.10944	0.958257	0.906841	1.02972
246	246	532	P00493	Hypoxanthine-guanine phosphoribosyltransferase OS=Mus musculus OX=10090 GN=Hprt1 PE=1 SV=3	Hprt1	24.6	6.68	14226	80	835	16	0	22233.2	13200.6	18944.3	23816.2	21426.7	16508.9	12868.3	14655.1	19240.7	17408.4	13948.4	10736.7	13694.6	21888	9154.9	19886.7	15962.9	16297.6	26346.8	16882.1	9162.3	11072.9	2610.6	17421.3	9064.4	18310	12103	17835.2	20468.1	18155.8		1.217	0.940528	1.1091	1.06379	1.04293	1.07467
247	247	4567	P11835	Integrin beta-2 OS=Mus musculus OX=10090 GN=Itgb2 PE=1 SV=2	Itgb2	85	7.12	3411	44	214	27	1	1303.3	417.6	1049.1	207.9	206.6	1993.1	659.1	1745.8	396.2	383.5	2136.1	943	1732.7	321.6	766.1	1263.6	289.2	1480.5	136.9	237.3	3565.1	813.8	4462.5	572.2	809.6	1758.7	469.5	1471.8	333.6	344.8		0.843052	0.712335	0.882394	0.841999	0.899087	0.835774
248	248	1983	P26350	Prothymosin alpha OS=Mus musculus OX=10090 GN=Ptma PE=1 SV=2	Ptma	12.2	3.79	57285	42	2125	11	0	32861	34552.2	26347.6	40065.9	52887.9	28535.4	33895.3	19599.1	26933.4	40214.7	19190	26765	17549.8	28180.3	20056.8	29213.3	44850.7	23140.7	39160.3	55704.9	11738.5	23802.5	2642	22483.6	19809.3	30319.5	36778.6	28131.4	29390.8	46236.2	Acetyl [N-Term]	1.43534	1.08506	1.06252	1.09124	1.14973	1.16478
249	249	1754	Q8K3K8	Optineurin OS=Mus musculus OX=10090 GN=Optn PE=1 SV=1	Optn	67	5.26	4620	51	285	32	0	3159.4	3013.6	2557.6	3414.7	3009.5	3067.1	3247.4	2718.1	3009.6	2548.8	2292.3	3285.7	2375	2830.7	1598.8	3152.8	1854.8	2312.4	2049.2	2031.1	2443.8	3064.3	793.6	2720.6	1682.1	3705.1	3852.6	3372.7	3947	3085.5	Acetyl [N-Term]	1.24083	1.18636	1.20801	1.31147	1.21057	1.23145
250	250	4657	P05064	Fructose-bisphosphate aldolase A OS=Mus musculus OX=10090 GN=Aldoa PE=1 SV=2	Aldoa	39.3	8.09	6272	68	276	22	0	1975	2893.4	2689.5	1967.9	1820	3383.8	3503.1	3528.9	1686.2	2513	5401	3527	4032.1	1682.5	9321	2818.9	2280.9	2891.4	1775.6	1691.8	9992.3	4647.9	21841.1	1924.6	9384.6	2543.6	2901.7	2386.7	1422.7	2173.3		0.67633	0.828323	0.751699	0.843731	0.864823	0.792981
251	251	1698	Q8K352	SAM and SH3 domain-containing protein 3 OS=Mus musculus OX=10090 GN=Sash3 PE=1 SV=2	Sash3	41.6	5.22	6307	76	287	17	0	6023	3390.1	3298.4	2406	3112.8	10598.4	4779.3	5609.1	4887.8	5405.5	7999.6	7020.8	5471.2	6680.8	4037.2	5598.2	2819.9	3724	2856.5	3019.5	9062	4764.4	2029.4	5489.9	4372.1	9581.1	4728	7041.7	4930.6	5319.5		1.25541	0.989266	0.904014	1.00876	0.98409	1.02831
252	252	1079	P47738	Aldehyde dehydrogenase, mitochondrial OS=Mus musculus OX=10090 GN=Aldh2 PE=1 SV=1	Aldh2	56.5	7.62	3626	40	200	17	1	865.3	290.3	1378.8		393.4	1559.2	323.2	1756.4		660.3	2403.2	590.2	2337.5		2627.5	1385.3	202.5	1506		367.5	2831.9	924	13504.6		2726.1	1291.5	264.3	1193.3		546.7		0.679401	0.81776	0.828309	NA	0.827957	0.788357
253	253	1797	Q8VCI5	Peroxisomal biogenesis factor 19 OS=Mus musculus OX=10090 GN=Pex19 PE=1 SV=1	Pex19	32.7	4.34	5732	62	313	18	0	9250.7	8976.1	6549.1	8160.5	9850	8373.5	9335.7	5662.7	7633.9	8371.7	6074.6	8522.6	4829.7	7832.7	5228.2	7877.8	10016.2	6313.8	7806.7	9692.4	5931.3	7589.9	1164.4	6748	5638.2	8877.4	9924.1	6775.2	8489.1	9140.6		1.19646	1.06303	1.06018	1.11203	1.09185	1.10471
254	254	3405	P54227	Stathmin OS=Mus musculus OX=10090 GN=Stmn1 PE=1 SV=2	Stmn1	17.3	5.97	21440	80	1627	23	0	63902.4	89150.2	84557.7	118236	82001.9	48424.9	84008.6	68598.1	75476.4	60457.5	31300.6	68892.4	58889.2	71880.6	24380.9	49730	107094	73890.2	100991	90711.3	11881.9	61051.7	5207.3	58421	22215.1	55243.3	96610.8	87704	92582.6	71250.9	Acetyl [N-Term]	1.27852	1.15001	1.1408	1.22664	1.17853	1.1949
255	255	2870	P63242	Eukaryotic translation initiation factor 5A-1 OS=Mus musculus OX=10090 GN=Eif5a PE=1 SV=2	Eif5a	16.8	5.24	12124	88	685	16	0	18832.2	16077.8	13644.7	13109.3	11972.5	25681.1	17234.8	24384.2	19911.4	22706.8	27319.8	22763.6	36381.4	23755.9	36061.1	19291.3	10394.2	15294.7	14385.3	12373.9	19936.6	22759.2	13685.5	29908.4	36085.4	17171.8	12138.2	12099	17981.5	23689.3	Acetyl [N-Term]	0.496182	0.704284	0.668655	0.903076	1.04327	0.763093
256	256	4079	Q9DBE9	pre-rRNA processing protein FTSJ3 OS=Mus musculus OX=10090 GN=Ftsj3 PE=1 SV=1	Ftsj3	95.5	8.38	3889	32	235	24	0	873.9	1800.6	2062.2	520.4	403.7	965.5	1646.2	1883.5	1678.5	1210.6	956	1588.6	1841.2	787	484.7	892.4	1446.9	1951	529.7	583.8	356.9	2050	433.7	1034.6	508.8	1325.7	1923.5	2352.3	1319.7	1273.3		1.2489	1.16845	1.37307	0.786238	1.05179	1.12569
257	257	2739	P42932	T-complex protein 1 subunit theta OS=Mus musculus OX=10090 GN=Cct8 PE=1 SV=3	Cct8	59.5	5.62	4835	55	264	29	0	1710.7	1765.9	2475.1	519.7	799.1	2498.9	1759.3	3258.8	395.1	1441.6	3974.2	2720.6	4172.9	395.4	5109.8	2166.3	1084.7	2816	399.9	875.8	3494	3855.3	10171.4	431.1	4874.2	2618.5	1273.1	1838.8	346.7	1214.1		0.564257	0.72364	1.04786	0.877499	0.842189	0.811089
258	258	1369	P35441	Thrombospondin-1 OS=Mus musculus OX=10090 GN=Thbs1 PE=1 SV=1	Thbs1	129.6	4.96	3255	33	190	33	0	907.2	344.2	1605.1	132.6	602.6	1704.8	623.8	2303	199.7	914.1	2632.2	1062.4	2992	174.4	2459.8	1115.6	341.7	1622.8	142.6	503.6	5100.5	1126.3	11593.3	176.7	1840	1199.4	578.2	2038.4	198.3	847.7		0.885106	0.9269	0.703543	0.992989	0.92736	0.88718
259	259	2924	Q8CIZ8	von Willebrand factor OS=Mus musculus OX=10090 GN=Vwf PE=1 SV=2	Vwf	309.1	5.5	2084	17	129	34	0	576.9	269.4	287.7	111.3	385.5	1298	501.9	623.3	242.7	695.1	1954.8	863	910.2	301.4	1111.2	644.1	309.1	363.8	128	366.4	3780.7	747.1	686.3	344.6	1184.9	806.4	448.6	560	195.3	609.9		0.898444	0.893804	0.621263	0.804697	0.877428	0.819127
260	260	943	Q9WVA4	Transgelin-2 OS=Mus musculus OX=10090 GN=Tagln2 PE=1 SV=4	Tagln2	22.4	8.24	8883	74	423	15	4	6393.3	4589.2	6633	7689.2	6652.5	7581.4	5307.7	7256	7011.3	7848.8	9002.4	5979.7	8345.5	9678	14627.9	6265.8	4319.6	6775.4	8316.9	6263	8548.2	5641.8	12642.4	8892.3	13690.6	7598	4435	5905.4	7357.1	7954.1		0.813864	0.835578	1.00219	1.04932	1.01342	0.942874
261	261	2445	O54879	High mobility group protein B3 OS=Mus musculus OX=10090 GN=Hmgb3 PE=1 SV=3	Hmgb3	23	8.37	7171	54	397	19	0	13073.1	9229	4176.5	25785.1	13095	5309.4	8828.3	2529.4	11021.9	5746.1	2272.5	2677	1287.3	5950	1924.1	10302.4	9942.6	3108.8	24346.7	15718.3	2103.2	3494	847	6421.5	1867.6	11430.9	9654	4044.7	16180	6125.4		1.59907	1.09353	2.15296	1.46799	1.06601	1.47591
262	262	1	Q925B0	PRKC apoptosis WT1 regulator protein OS=Mus musculus OX=10090 GN=Pawr PE=1 SV=2	Pawr	35.9	5.92	6548	73	237	19	0	1465.3	1391.1	988.3	988.1	1849.4	1734.6	1876.8	934.6	1167.8	2304.6	1684.6	1895.4	923.8	1773	1843.4	1590.8	1449.4	979.3	1082.3	1902.8	3134.1	1810.3	508.8	1311.1	2035.4	1645.7	1805.1	1175.6	986.6	1927.6		1.25786	0.961797	0.948749	0.844836	0.836414	0.969932
263	263	1751	Q8R317	Ubiquilin-1 OS=Mus musculus OX=10090 GN=Ubqln1 PE=1 SV=1	Ubqln1	61.9	4.94	11514	41	510	13	4	7135.4	7147.5	7289.2	4372.4	7516.1	7333	6960.1	5354.3	4211.8	6531.2	6145	5866.4	4746.6	4443.4	4576.3	8786.7	7796.5	7379.4	4847.9	6608.5	5533.8	5913.5	1677.7	4204.4	4405.6	7135.9	6285.4	6423.3	4178.5	6483.4	Acetyl [N-Term]	1.19965	0.903062	0.973122	0.992094	0.992681	1.01212
264	264	798	Q8K4Z5	Splicing factor 3A subunit 1 OS=Mus musculus OX=10090 GN=Sf3a1 PE=1 SV=1	Sf3a1	88.5	5.22	2763	36	182	24	0	902.4	1004.9	697.3	276.1	1205.5	1107.6	1524.4	950.9	440	1399.3	1570.5	1424.7	966.5	276.2	2118.9	1185.3	1412.1	928.4	372.5	1323	1358.3	1711.1	1768.8	394.6	2120.1	1175.8	1517.6	693.4	343.3	1151.7	Acetyl [N-Term]	0.729204	0.995539	1.06157	0.780227	0.823054	0.87792
265	265	4443	Q0P678	Zinc finger CCCH domain-containing protein 18 OS=Mus musculus OX=10090 GN=Zc3h18 PE=1 SV=1	Zc3h18	105.6	7.8	4775	39	242	27	0	2451.2	3619.7	4391.5	1125.3	926.6	2311.2	3621.6	4310.6	1718.5	1357	1978.2	3136.1	3515.2	1187.7	669.5	2735.7	3111.9	4740.9	998.3	1096.4	1506.6	3414.4	1638.8	1313.3	736	2572.9	3576.1	4480.8	1518.8	1238		1.03948	0.987436	1.11323	0.883794	0.912307	0.98725
266	266	2188	Q7TPM1	Protein PRRC2B OS=Mus musculus OX=10090 GN=Prrc2b PE=1 SV=1	Prrc2b	160.8	8.16	2183	28	148	31	0	259.2	695.7	431.1	435	495.7	187.8	690.8	368.4	310.5	429.3	160	657.2	368.4	351.5	242.1	210.2	731.5	419.3	463.7	495.7	100.8	617.1	184	267.2	238.5	242.6	722	401	358.9	407.6		1.08849	1.04517	1.2918	1.15588	0.949453	1.10616
267	267	770	Q61792	LIM and SH3 domain protein 1 OS=Mus musculus OX=10090 GN=Lasp1 PE=1 SV=1	Lasp1	30	7.05	14653	57	644	19	0	20897.5	16530.7	17730.2	22420.4	22607.2	21685.8	22255.8	18653.9	24795.5	28190.4	23327.2	18693.6	18832.5	34775.5	21401.6	19063.2	18314	19267	28908.4	25491.1	31927.5	17734.4	9958.3	35336.2	24466.7	19766.8	19019.7	17292.7	23983.9	25251.7		0.927029	0.854595	0.911509	0.967268	0.895755	0.911231
268	268	120	Q01320	DNA topoisomerase 2-alpha OS=Mus musculus OX=10090 GN=Top2a PE=1 SV=2	Top2a	172.7	8.6	5058	16	206	25	2	3818.6	1977.4	1531.8	2677	3276.6	4106.7	2842.9	2083.3	5189.2	4992.2	3678	2363.9	1604.1	2845.4	1796.3	3444.4	1915.6	1927.1	2723.8	3803.8	726.6	2711.2	373.8	3058.1	1762.4	5865.1	2784.7	1901.6	4904.8	4520.2		0.912783	0.979528	1.42818	0.945194	0.905453	1.03423
269	269	3002	Q62393	Tumor protein D52 OS=Mus musculus OX=10090 GN=Tpd52 PE=1 SV=2	Tpd52	24.3	4.72	4884	69	293	14	0	3119.2	2144.1	5353.6	5255.8	2970.7	3773.9	2141.2	4061.8	7882.8	3053.6	7108.7	4066.3	4495.4	13083.3	5498.4	2709.1	1713.1	5596.6	5422.6	2717.4	5163.1	1943.1	2267.3	8458.4	7141.7	4307.9	1938.6	4026.2	6638.3	2692.6		0.991235	0.90538	1.1415	0.842125	0.881779	0.952403
270	270	662	O08795	Glucosidase 2 subunit beta OS=Mus musculus OX=10090 GN=Prkcsh PE=1 SV=1	Prkcsh	58.8	4.46	11020	43	535	22	0	12356.2	11791.3	7706	9427	8858.2	18072.4	15159.1	12080	17878.1	14126.5	16741.6	16900.4	12067.6	20349.6	11176.4	12572.2	7198.8	9357.6	8841.1	6846.3	16631.7	15866.3	3885.1	21702.2	12270.4	11908.1	12235.6	7967.8	15776.5	13904.1		0.659586	0.807146	0.658911	0.882448	0.984257	0.798469
271	271	920	P97371	Proteasome activator complex subunit 1 OS=Mus musculus OX=10090 GN=Psme1 PE=1 SV=2	Psme1	28.7	5.97	4612	77	353	20	0	4349.5	4967.4	4708.9	2477	2748.8	6110.2	5622.1	6666.6	3338.8	4608.8	14825.9	10587.9	9425.6	4660.5	25536.2	4530.2	3790.9	5510.4	2764	2543.2	13806	9467.4	30757	6785.2	21464	4966.6	4903.9	4570.5	3007	4639.4		0.685582	0.872254	0.812838	0.900623	1.00664	0.855587
272	272	712	Q61699	Heat shock protein 105 kDa OS=Mus musculus OX=10090 GN=Hsph1 PE=1 SV=2	Hsph1	96.3	5.53	3189	35	203	24	0	1574	1686.1	1533.6	1847.8	2153.1	1785.1	3022.3	3531.6	4211.3	5619.8	2384.6	2320.1	2444.2	2236.2	3178.2	1896.3	1567.4	3155.4	2124.6	3612.5	1526.1	3219.3	2168.9	4239.4	3705	1515.4	1899.5	1958.9	2268.9	2412.1		0.554678	0.628495	0.848916	0.538765	0.429215	0.600014
273	273	4477	Q9Z2X1	Heterogeneous nuclear ribonucleoprotein F OS=Mus musculus OX=10090 GN=Hnrnpf PE=1 SV=3	Hnrnpf	45.7	5.49	8032	47	411	13	0	1301.8	1414	1925.3	574.9	1344.6	2068.7	1769	3168.4	1542.1	3568.7	3385	3091	4441.1	992.8	4908.1	1381.5	873.8	2356.3	478	1314.1	2873.1	2732	6638	1488.5	5203.9	1999.1	1552	1969.6	1121.4	3653.3	Acetyl [N-Term]	0.621639	0.877332	0.966356	0.72719	1.02371	0.843244
274	274	4117	Q08288	Cell growth-regulating nucleolar protein OS=Mus musculus OX=10090 GN=Lyar PE=1 SV=2	Lyar	43.7	9.5	5838	45	247	23	0	3030.7	3542.6	6255.7	714.1	3190.1	2242.4	2531.4	4344.1	799.9	3724.1	2325.8	1771.8	4045.9	923.4	2395.8	3378.9	2850.3	5920.9	809.5	2966.2	650	2748	895.5	779.2	2288.7	3476.6	2704.4	4926.3	878.4	4085.8		1.13402	1.06834	1.55039	1.09814	1.09712	1.1896
275	275	1497	Q8R409	Protein HEXIM1 OS=Mus musculus OX=10090 GN=Hexim1 PE=1 SV=1	Hexim1	40.2	5.38	5575	49	274	13	0	6670.8	4861.7	6768.3	4627.9	5359.8	5562	4652.2	5038.7	3718.2	4462.8	5471.4	4490.3	5286.2	4503.8	2860.5	6721.1	5739.5	6746.5	4128.4	5830	3629	4449	1683.9	3685.9	3150.9	6156	4832	6733.6	3793.1	4852.5	Acetyl [N-Term]	1.33638	1.03865	1.1068	1.02014	1.08732	1.11786
276	276	937	Q8JZQ9	Eukaryotic translation initiation factor 3 subunit B OS=Mus musculus OX=10090 GN=Eif3b PE=1 SV=1	Eif3b	91.3	5.02	7779	32	198	19	0	670.4	518.6	777.1	319.7	785.2	875.3	747.5	1020.9	680	1487.4	1170.1	690.8	989.6	319.5	1132.8	927.5	477.1	1028.3	443.4	1078	895.6	986.2	1561.1	527	1228.4	824.8	601.4	806.1	440.1	992.8		0.789597	0.804548	0.942305	0.647206	0.667473	0.770226
277	277	478	O88342	WD repeat-containing protein 1 OS=Mus musculus OX=10090 GN=Wdr1 PE=1 SV=3	Wdr1	66.4	6.6	3052	56	192	24	0	1401.7	172.8	1039.3		281.7	1801.3	216.8	1489.4		429.5	2531.2	351.7	1713.4		2335.2	1775.8	128	1411.5		239.2	4676.5	503.5	13086.5		2657.3	1323.6	157.7	1013.1		359.7		0.680207	0.727399	0.734803	NA	0.837485	0.744973
278	278	566	Q7TMM9	Tubulin beta-2A chain OS=Mus musculus OX=10090 GN=Tubb2a PE=1 SV=1	Tubb2a	49.9	4.89	7885	56	375	17	3	119.4	124.9	160.6		157.4	162.8	95.1	194.7		278.3	272.8	186.5	218.6		655.7	156.3	73	174.7		153.9	390.6	201.3	1252		716.4	140.9	93.6	99.5		230.5		0.511043	0.984227	0.865479	NA	0.828243	0.797248
279	279	2219	Q8C9B9	Death-inducer obliterator 1 OS=Mus musculus OX=10090 GN=Dido1 PE=1 SV=4	Dido1	247	7.91	3056	21	156	29	0	996.1	2176.1	561.8	754.4	1627.5	974.4	2467.1	518.6	817.5	1726.9	862	2688.9	532.9	807.6	1049.2	950.3	2148	677	824	1818.2	809.3	2647	200.9	585.3	1177.6	1053.6	2343.4	623.2	777.1	1569.9		1.2017	0.94986	1.08128	0.950581	0.909086	1.0185
280	280	2404	A2A6A1	G patch domain-containing protein 8 OS=Mus musculus OX=10090 GN=Gpatch8 PE=1 SV=1	Gpatch8	164.9	7.64	2581	22	172	29	0	907.2	910.6	637.8	476.8	294.3	1020.9	991.9	894.8	521.9	318	840.3	971.1	881.6	504.5	236.3	913.4	861.7	713.7	490.4	319.8	602.9	936.3	297.9	511	257.1	988.8	1064.8	780.6	431.1	277.8		0.872374	1.0735	0.968557	0.82602	0.873585	0.922806
281	281	1262	Q6PDN3	Myosin light chain kinase, smooth muscle OS=Mus musculus OX=10090 GN=Mylk PE=1 SV=3	Mylk	212.8	6.25	3730	17	187	29	0	1629.8	1291.8	1792.7	1146.8	2363.6	2080.7	1570.6	2156.8	1295.9	3141.9	1632.8	1201.7	1897.1	1801.9	3154.1	1754.5	1515.9	1647.7	1065.8	2146	3295.7	1445.1	2511	1413.5	3138.2	1686.6	2051.7	2044.9	1243.3	2644.9		0.948118	1.30632	0.810593	0.95941	0.841815	0.97325
282	282	2774	Q9CWJ9	Bifunctional purine biosynthesis protein PURH OS=Mus musculus OX=10090 GN=Atic PE=1 SV=2	Atic	64.2	6.76	3120	51	164	20	0	515.3	817	1427	246.7	318	925.4	786	1689.6	214.1	525.9	1482.5	1027.9	1719	174.6	1739.7	807.2	459.7	1621.3	193.5	370	1074.6	1468.4	5739	269.4	1623.9	855.9	543	1134.9	150.2	472.8		0.671697	0.69084	0.924897	0.701541	0.89903	0.777601
283	283	378	P09411	Phosphoglycerate kinase 1 OS=Mus musculus OX=10090 GN=Pgk1 PE=1 SV=4	Pgk1	44.5	7.9	4956	58	248	20	0	976.2	1123.1	2026.2	696.6	1192.7	1941.9	1173.1	2671.1	785.7	1746.2	3612	1540.6	3415.1	629.9	6187.4	1650.3	821	2521.6	575.9	929.9	4436.8	2192.2	17724.2	1090.1	6403.5	1364.7	908.4	1558.9	508.6	1362.3		0.583617	0.774359	0.702765	0.647321	0.780151	0.697643
284	284	3052	Q9WTX5	S-phase kinase-associated protein 1 OS=Mus musculus OX=10090 GN=Skp1 PE=1 SV=3	Skp1	18.7	4.54	7159	72	359	13	0	5053	2970.5	3412.8	4892.8	3852	6966.7	3694.5	7265.6	9236.3	5801.4	5140.9	4012.3	7818	8359.6	5221.3	5474.3	1995.8	3412.6	4394.3	3350.5	6333.1	3365.1	2430	9024.4	5392.6	5355.8	3465.8	5724.3	8470	6279.2		0.787863	0.938097	0.768771	0.917034	1.08236	0.898825
285	285	1407	Q3TQI7	Telomere length and silencing protein 1 homolog OS=Mus musculus OX=10090 PE=1 SV=2	Q3TQI7	33.5	6.34	5832	63	348	19	0	8895.5	8060.4	9683.2	13128.6	10902.8	7949.7	7684.2	7456	11024.3	9332.2	7203.1	7661.4	7267	11827.6	5201	8903.5	9461.7	9533.7	13295.3	9814	4942	6666.1	1546.6	9927.8	5659.6	7496	8688.2	9593.8	11492.7	9996.1		1.28672	1.13066	0.942929	1.04249	1.07114	1.09479
286	286	4532	Q9Z1Q9	Valine--tRNA ligase OS=Mus musculus OX=10090 GN=Vars PE=1 SV=1	Vars	140.1	7.77	2413	30	148	30	0	393.7	177.8	1636.2	181.8	532.7	611	188.7	1663.4	239.7	733.3	898.8	226.4	1653.8	195	1511.2	570.5	154.1	1755.1	154.5	566.2	844.3	297.8	6990	205.4	1471.6	631.6	167.6	1440.7	176.7	683.3	Acetyl [N-Term]	0.866118	0.888182	1.03372	0.737171	0.931815	0.8914
287	287	3574	Q6PGH2	Jupiter microtubule associated homolog 2 OS=Mus musculus OX=10090 GN=Jpt2 PE=1 SV=1	Jpt2	20	8.62	9480	78	426	12	0	14277.8	12686.7	10761.2	15739.1	12255.6	10896	11506.5	7523.4	11549.4	9816.2	8548.2	9425.9	7009.2	12029.9	4355.1	12487.2	15086.9	9792.4	15742.9	14099.8	5593.1	9246.4	1517.7	9916.6	4756.2	11371	12480.4	9469.1	12410.3	10362.2	Acetyl [N-Term]	1.25862	1.08464	1.04359	1.07454	1.05562	1.1034
288	288	2638	Q99K41	EMILIN-1 OS=Mus musculus OX=10090 GN=Emilin1 PE=1 SV=1	Emilin1	107.5	5.3	4664	28	200	19	0	520.6	917.6	476.7	570.6	622.7	633.3	1219.5	571.1	831.9	932.9	598.5	1566.6	550	762	709	502.3	926.9	584.5	600.4	655.8	989.1	1346.8	505.9	704.3	739.4	690.6	999.9	564.6	735.7	798.2		0.988618	0.819926	1.09048	0.884361	0.855612	0.927799
289	289	250	Q61599	Rho GDP-dissociation inhibitor 2 OS=Mus musculus OX=10090 GN=Arhgdib PE=1 SV=3	Arhgdib	22.8	5.11	4969	71	344	16	0	5101.4	5508.9	6154.4	3579.2	4663.5	6426.6	7028.3	5700.9	3949.7	6163.6	9179	7619.1	6747.6	5213.9	14433.5	5906.4	6546.5	7383.2	4257.4	4827.2	18043.5	8772.1	25768.8	5535.5	14849.8	5855.1	5226.9	5764.8	3047.5	5375.8	Acetyl [N-Term]	1.01121	0.743693	0.911073	0.771578	0.872185	0.861948
290	290	466	P47968	Ribose-5-phosphate isomerase OS=Mus musculus OX=10090 GN=Rpia PE=1 SV=2	Rpia	32.4	8.02	4830	53	276	17	0	5959.5	4771.7	5740.7	9650.5	9485.6	3304.9	3936.4	3735.1	7776	3128.2	2272.5	2147.8	2183.9	8886.6	649.5	5950.9	6621.7	3885.1	7036.3	5881.5	1297.3	2341.2	1019.7	5976.3	600.9	6401.8	5645.8	9355.5	7972.4	3249		2.50475	1.43425	1.93706	1.02526	1.03862	1.58799
291	291	253	P29341	Polyadenylate-binding protein 1 OS=Mus musculus OX=10090 GN=Pabpc1 PE=1 SV=2	Pabpc1	70.6	9.5	3063	37	187	19	0	1439.3	2300	2864.7	735.4	4084.1	1557.7	2748.2	2331.3	648.8	4409.5	1455.3	2696.3	2225	757.1	2919.8	1504.3	2712.1	3373.8	795.1	3767.8	1202.9	2811.3	3024.3	542.6	2972.3	1839.6	2572.2	2938	625	3772.3		1.26024	0.935958	1.18097	0.963317	0.855494	1.0392
292	292	3416	Q9CZ44	NSFL1 cofactor p47 OS=Mus musculus OX=10090 GN=Nsfl1c PE=1 SV=1	Nsfl1c	40.7	5.15	9923	57	319	19	0	2522.8	2803.4	2807.3	1891.4	2210.7	3046.1	3599.4	3321.6	1988.2	2923.6	3415.8	4411	3677.1	2396.2	3525.1	2805.7	2635.4	3324.8	2077.2	2205.3	4051.8	4349.2	3722.7	2361.6	3946	3033.9	2911.1	2786.9	1635.2	2518.1		0.839023	0.808774	0.995995	0.822452	0.861301	0.865509
293	293	1032	P21981	Protein-glutamine gamma-glutamyltransferase 2 OS=Mus musculus OX=10090 GN=Tgm2 PE=1 SV=4	Tgm2	77	5.1	4025	37	215	21	0	494.8	55.2	626.4		454.9	915.2	119.1	1031.4		800	1222.5	311.6	1126.9		2463.6	590.9	47.5	861.6		534.4	2255.9	306.9	5123.5		3015.4	870.8	72.7	702.4		684.3	Acetyl [N-Term]	0.681016	0.610411	0.951486	NA	0.855375	0.774572
294	294	753	P68254	14-3-3 protein theta OS=Mus musculus OX=10090 GN=Ywhaq PE=1 SV=1	Ywhaq	27.8	4.78	6422	66	295	17	1	543.8	757.4	737.2	418.5	500.8	1154.7	776.7	1065.7	434.6	728.1	2260.8	1229	1506.8	376.9	2466.3	907.8	513.8	923.3	278.6	457.2	3546.4	1499.2	5781	820.7	2328.4	846.8	740.8	688.7	267.1	665.9		0.646242	0.953779	0.733351	0.614588	0.914572	0.772506
295	295	355	Q00547	Hyaluronan mediated motility receptor OS=Mus musculus OX=10090 GN=Hmmr PE=1 SV=4	Hmmr	91.7	5.52	1860	44	135	25	0	810.5	930.4	787.9	555.4	550	801.4	893.3	1172	664.5	582.1	576.2	781.8	1075.6	582.3	367.9	749.2	660.7	774.1	446.1	287.5	365.5	715.3	364.4	443.3	366.8	930.3	1028.3	1178.1	712.1	628.1		1.0052	1.15113	1.16084	1.07163	1.07902	1.09357
296	296	950	O09044	Synaptosomal-associated protein 23 OS=Mus musculus OX=10090 GN=Snap23 PE=1 SV=1	Snap23	23.2	4.98	3160	66	175	12	0	1640.3	1037.2	1473.7	856.8	1375.3	2212	1205	1666.7	829.2	1243.2	2176.1	1187.6	1548.1	812.6	1276.8	1901.7	1079.4	1826.2	807.7	1203.8	2506.5	1171.5	1487.6	884.7	1134.3	1914.4	1193.3	1650.1	804.4	1207.9	Acetyl [N-Term]	0.99004	0.99029	0.865461	0.970092	0.971606	0.957498
297	297	2320	Q9ES52	Phosphatidylinositol 3,4,5-trisphosphate 5-phosphatase 1 OS=Mus musculus OX=10090 GN=Inpp5d PE=1 SV=2	Inpp5d	133.5	7.8	3438	28	229	29	0	3267.8	2327.6	2478.5	3823.6	3856	3431.2	3146.8	2638.2	3818	4473.6	2600.7	3096.4	2284.1	4909	2988	2917.5	2996.3	3049.2	4499.9	3682.9	3386.8	2615.7	1972.4	3510.7	3656.9	3902.5	2802.9	2936.6	3565.2	4008.1		1.11311	0.890714	1.13736	0.933787	0.895945	0.994182
298	298	3548	P16858	Glyceraldehyde-3-phosphate dehydrogenase OS=Mus musculus OX=10090 GN=Gapdh PE=1 SV=2	Gapdh	35.8	8.25	5605	46	316	11	0	2344	2078.4	2831	4520.4	1204	3870.3	1723.7	3176.2	4230	2322.5	7983.1	2809.8	3538.8	3341.9	14079.6	4093	897.7	3037.4	3339.9	1802.7	10808.2	4188.3	20524.8	5770	13930.1	3279.1	1164.7	2321	2515.6	1919.1		0.730747	0.675698	0.847247	0.594704	0.826308	0.734941
299	299	2601	Q9D824	Pre-mRNA 3'-end-processing factor FIP1 OS=Mus musculus OX=10090 GN=Fip1l1 PE=1 SV=1	Fip1l1	64.9	5.77	5885	50	291	21	0	7398.9	7065.7	5143.1	7654.2	8095.2	6385.2	7181.1	4524.8	6041.7	6606.4	4986	5816.4	4173.4	5848.5	4110.3	7253.2	7308.8	4844.3	7573.9	8561.9	4241.3	5337.4	1083	5180.6	4343.3	6364.7	7496.5	4968.3	6226	7298.2		1.09802	1.04392	0.996789	1.0305	1.10472	1.05479
300	300	2101	P83917	Chromobox protein homolog 1 OS=Mus musculus OX=10090 GN=Cbx1 PE=1 SV=1	Cbx1	21.4	4.93	7928	75	669	16	3	4938.7	2497.3	2876.2	3587.3	4101.8	7332.2	3188.1	6104.1	7683.1	7533.8	7790.9	5148.1	7626.4	8946.6	9128.8	4600.9	1486.4	3411.6	3187.4	3558.4	10334.9	4386.9	2826.9	10674.3	10766.9	5219.2	2822	3913.5	6600.3	7793.3		0.641126	0.885167	0.711819	0.859067	1.03444	0.826325
301	301	1773	P42225	Signal transducer and activator of transcription 1 OS=Mus musculus OX=10090 GN=Stat1 PE=1 SV=1	Stat1	87.1	5.58	2150	35	117	24	0	173.7	29.6	396.3		243.4	248.3	63	863.1		317.4	272.2	84.8	970.7		660.4	240.9	18.9	553.3		214.4	427.1	76.3	11668.1		709.6	200.3	60	478.4		278.1	Acetyl [N-Term]	0.554281	0.952381	0.806685	NA	0.876181	0.797382
302	302	3522	Q9Z2D6	Methyl-CpG-binding protein 2 OS=Mus musculus OX=10090 GN=Mecp2 PE=1 SV=1	Mecp2	52.3	9.96	3047	41	228	21	0	2476.5	2972.8	1692	1404.4	1989.5	3321	3556.4	2242	2414.5	2725.1	4290.5	4818.7	2668.7	3739.4	4570.7	2290.6	2539.1	1917.8	1514.9	1867.4	5506	4251.6	2257.4	3516.7	4966.7	3563	3329.5	2098.4	2146	2745.4		0.93595	0.9362	1.07287	0.888797	1.00745	0.968253
303	303	2411	A2BH40	AT-rich interactive domain-containing protein 1A OS=Mus musculus OX=10090 GN=Arid1a PE=1 SV=1	Arid1a	241.9	6.68	7045	14	187	21	1	2273.8	2047.8	1786.9	2004.7	2450.1	2152.2	2584.9	1597.5	1804.5	2668.7	1785.6	2628.1	1494.7	2370.6	1485.1	1988	3050.1	2245.6	2392.1	2656.8	1454.7	2149.4	561.2	1573.1	1822.9	2341.6	2542.8	1759.7	1853.6	2365.2	Acetyl [N-Term]	1.10153	0.983713	1.088	1.02721	0.886274	1.01735
304	304	3813	Q9ERU9	E3 SUMO-protein ligase RanBP2 OS=Mus musculus OX=10090 GN=Ranbp2 PE=1 SV=2	Ranbp2	340.9	6.18	1534	14	145	32	1	753.3	237.1	344	413.2	976.2	924.9	295.8	473.6	499.2	1325.1	936.2	332.6	595	432.3	1166	822.6	221.2	418.2	440.9	1162.2	916.2	346	774.1	440.2	1348.8	917.6	254.1	315	400.9	1013.2		0.665118	0.859026	0.992107	0.803085	0.764622	0.816792
305	305	2884	P54726	UV excision repair protein RAD23 homolog A OS=Mus musculus OX=10090 GN=Rad23a PE=1 SV=2	Rad23a	39.7	4.58	7422	64	384	15	0	3630.8	3209.9	1771.6	2262.2	2368.1	2770.5	2545.5	1590.1	1517	1671	2053.6	3109	1430.7	1468	1314.3	3692.2	3592.7	1536.2	1666.6	1843.5	2617.6	2384.6	691.5	1167.2	1296	4285.6	3691.8	2541.8	1904.7	1927.8	Acetyl [N-Term]	1.59852	1.45032	1.54687	1.25557	1.15368	1.40099
306	306	2490	Q923D5	WW domain-binding protein 11 OS=Mus musculus OX=10090 GN=Wbp11 PE=1 SV=2	Wbp11	69.8	8.4	5205	33	284	23	0	9845.1	7933.8	5616.4	5823.9	8350.5	6975.4	7569.8	4447.7	5255.4	6919	4370.6	5442.9	3826	4337.1	2968.2	9848.6	9379.4	5483.2	5780.4	8568.9	3862.9	5296	1414.2	3814.2	3066.4	8260.6	7937	6021.9	5565.3	6859.6		1.35394	1.04851	1.18425	1.05897	0.991415	1.12741
307	307	1707	P01027	Complement C3 OS=Mus musculus OX=10090 GN=C3 PE=1 SV=3	C3	186.4	6.73	1862	22	110	31	0	105.7	82.5	714.9		212	121.4	94	788.8		234.3	174.5	147.9	982.3		414.2	110.9	52.5	628		237.3	306.7	184	3472.3		442.2	135.6	78.5	641.1		208.9		0.812754	0.835106	1.11697	NA	0.891592	0.914105
308	308	4267	P57776	Elongation factor 1-delta OS=Mus musculus OX=10090 GN=Eef1d PE=1 SV=3	Eef1d	31.3	5.02	9520	73	350	18	0	3592.3	4451.8	3113.7	3825.6	2675.7	6488.7	5478.7	7797.8	7615.8	6283.9	6463.2	8572.9	9691.6	8789.5	8070.6	4307.7	2521.7	3906.1	3939.8	2462	5619.7	7237.7	3719.8	10655.2	8628.6	3986.2	4173	3424.8	6545.7	6684.8	Acetyl [N-Term]	0.439201	0.761677	0.61433	0.859489	1.0638	0.747699
309	309	584	E9Q1P8	Interferon regulatory factor 2-binding protein 2 OS=Mus musculus OX=10090 GN=Irf2bp2 PE=1 SV=1	Irf2bp2	59.3	8.69	4474	39	163	14	1	2647.1	2161.6	1762.2	1410	1985.3	2256.3	2444.5	1717.9	1389.6	2230.1	2021.9	2324.3	1675.9	1527.2	1122.1	2214.1	2556.2	2149.3	1732.9	2251.2	1555.1	2098.9	696	1169.7	1257.3	2580.2	2302.7	1747.2	1352	2079.4		1.01706	0.941992	1.14355	0.972942	0.932425	1.00159
310	310	473	Q62446	Peptidyl-prolyl cis-trans isomerase FKBP3 OS=Mus musculus OX=10090 GN=Fkbp3 PE=1 SV=2	Fkbp3	25.1	9.28	5159	67	390	19	0	11039	8277	8525.1	11077	12023.1	9258	8479.7	7484.8	9606.9	11289.5	9480.6	6752.9	7722.6	9995.1	7167.7	10855.3	7657.3	8992.2	11449.4	12362.2	6374.4	7011.5	3057.1	9357.8	7440.5	9225.4	8058	7480.2	9610.5	11729	Acetyl [N-Term]	0.999385	0.950269	0.996479	1.00037	1.03893	0.997088
311	311	1221	Q9CYA6	Zinc finger CCHC domain-containing protein 8 OS=Mus musculus OX=10090 GN=Zcchc8 PE=1 SV=3	Zcchc8	78	4.73	2881	49	194	21	0	462.8	948.6	413.3	360.2	643.7	597.3	1097.4	652.8	477.1	695.9	532.5	1269.5	707.6	435.3	497.4	515.3	635.9	436.3	347	589.3	421.6	1147.3	223.5	453.9	529.1	445.4	886.8	397.5	430.9	652.2	Acetyl [N-Term]	0.608915	0.808092	0.745689	0.903165	0.937204	0.800613
312	312	2373	Q6A068	Cell division cycle 5-like protein OS=Mus musculus OX=10090 GN=Cdc5l PE=1 SV=2	Cdc5l	92.1	8.02	3204	37	188	22	0	772.3	487.6	756.7	370.4	452.4	916.2	912.4	1069.5	859.7	1083.3	851.7	930.2	1053.4	548.5	741.1	977.3	449.2	1038.1	415.7	739.4	899.2	1107.5	1902.9	673.7	841.7	1012.1	741.3	741.9	578.3	721.7		0.693689	0.812473	1.10467	0.672677	0.666205	0.789943
313	313	1396	Q9DBR0	A-kinase anchor protein 8 OS=Mus musculus OX=10090 GN=Akap8 PE=1 SV=1	Akap8	76.2	5.14	5087	36	188	18	0	2907	1363.8	856.7	767.3	1663.1	2352.3	1290.4	1022.7	1027.1	1419.4	3637.5	1330.9	1249.1	892.2	1643.8	2634.4	1139.1	1006.5	829	1802.1	2000.5	1149.1	800.1	857.5	1390.4	2786.2	1278.8	1035.4	1029.3	1456.3		1.01242	0.991011	1.18446	1.00214	1.026	1.04321
314	314	615	P23116	Eukaryotic translation initiation factor 3 subunit A OS=Mus musculus OX=10090 GN=Eif3a PE=1 SV=5	Eif3a	161.8	6.77	3029	24	236	34	0	2164.2	2606.8	1791.5	1664.7	2189.4	2161.5	3302.2	2042.5	2396.1	2594.4	2119.5	3472.2	2141.7	1713.4	1908	2383.2	2791.6	2118.8	1880.9	2202.9	1651.7	3505.4	3486	1802.8	2008.8	2476	3490.6	1905.2	2330.4	2362.8		0.932778	1.05705	1.1455	0.97258	0.910731	1.00373
315	315	4459	Q99PG2	Opioid growth factor receptor OS=Mus musculus OX=10090 GN=Ogfr PE=1 SV=1	Ogfr	70.6	4.77	3737	45	207	20	0	5799.9	4317.5	4306.4	2278.7	9243.4	6735.5	5897.8	3478.3	1998.3	7278.6	4174.9	4589.1	3041.1	2836	4568.5	6277.2	5630.4	4957	2737.6	6899.8	5299.3	5547.2	2035.6	1853.7	4357.6	7546.8	5476.6	4619.2	1821.1	6131.3		1.32801	0.928584	1.12045	0.911325	0.842374	1.02615
316	316	1211	P49312	Heterogeneous nuclear ribonucleoprotein A1 OS=Mus musculus OX=10090 GN=Hnrnpa1 PE=1 SV=2	Hnrnpa1	34.2	9.23	4972	64	300	19	0	2312.4	1678	2170	2636.2	2852.3	2257.3	1969.2	2382	2610	3227.8	3128.1	1939.6	2464.2	2245.4	3103	2598.1	1367.7	2740.2	2832	3057	2383.6	2360.6	5092.9	2475.2	3294.1	2190.4	1618.5	1869	2214.5	2775		0.784635	0.821907	0.970363	0.848467	0.859719	0.857018
317	317	2407	Q9CYZ2	Tumor protein D54 OS=Mus musculus OX=10090 GN=Tpd52l2 PE=1 SV=1	Tpd52l2	24	6.15	7989	52	338	14	0	7072.1	6513.8	11130.2	6475.2	5250.3	6957.5	5488	6761.5	6105	4106.8	9732.3	7665	6847.6	7903.2	5777.8	6914.1	5362.4	10792.2	5653.9	5146.7	6475.9	4159.2	2887.3	5418.8	5443.6	8307.6	5879.1	8139	6712.7	4017.1	Acetyl [N-Term]	1.20373	1.07126	1.19405	1.09954	0.978158	1.10935
318	318	3795	P97825	Jupiter microtubule associated homolog 1 OS=Mus musculus OX=10090 GN=Jpt1 PE=1 SV=3	Jpt1	16.1	5.31	7608	82	385	9	0	8923.7	6418.1	6633.4	5823.7	4205.4	6580.7	5199.2	3839.4	4075.1	2759.8	5556.3	4783.7	4038.8	4447.4	1665.9	8457.8	7811.1	6002.8	6064.9	4290.9	3538	4477.8	723.3	3641.9	1410.7	7434.8	5676	5980.3	4828.6	3139.2		1.55761	1.09171	1.12979	1.1849	1.13747	1.2203
319	319	236	Q5SV85	Synergin gamma OS=Mus musculus OX=10090 GN=Synrg PE=1 SV=1	Synrg	139.5	5.03	1427	26	132	25	0	928.1	810.6	417.7	712.1	590.3	916.8	985.8	401.7	532.1	615.5	852	1094	412.4	591.4	554.9	825.9	953	474.7	684.4	564.2	977	1024.1	322.9	486.1	592	945.1	885.7	433.5	512.5	561.1		1.07916	0.898458	1.03087	0.963165	0.911617	0.976654
320	320	1853	Q99KG3	RNA-binding protein 10 OS=Mus musculus OX=10090 GN=Rbm10 PE=1 SV=1	Rbm10	103.4	5.92	3450	29	170	25	3	853.1	902.5	1291.8	804.6	2044.1	991.8	1096.5	1302.5	1070	2846.7	961.6	1052.7	1306.9	948.2	3653.1	916.5	866	1515.7	929.1	2184.3	991.8	1165.3	1044	850.1	3824	1181.5	1029.1	1537.5	983.6	2522.6		1.18042	0.938532	1.19127	0.919252	0.886149	1.02312
321	321	3651	Q60974	Nuclear receptor corepressor 1 OS=Mus musculus OX=10090 GN=Ncor1 PE=1 SV=1	Ncor1	270.5	6.93	2914	13	155	26	1	792	986.7	434.8	770.9	685.4	861.9	1251.2	413.2	875.4	776.8	747.7	1344.6	427.8	954.9	624.3	770.2	1239.7	496.7	927.6	657.4	764.8	1113	275.3	826.3	669.7	946	1218.4	459.6	756.5	724.7		1.11229	0.973785	1.09758	0.864176	0.93293	0.996152
322	322	4428	P43277	Histone H1.3 OS=Mus musculus OX=10090 GN=Hist1h1d PE=1 SV=2	Hist1h1d	22.1	11.03	13089	49	671	19	16	20978.1	36271.3	34630.1	20184.3	17735.5	24144.1	28170.8	32765.7	25067.5	25609.9	30510.9	27592.2	34590	27876.9	31095.1	31465.7	28424.4	32272	23850.2	17694.1	22827.3	37436.4	47461.8	27725.6	29569	19890	27834.4	27537.2	24502.4	26654.5	Acetyl [N-Term]	0.840428	0.988059	0.823804	0.977457	1.04079	0.934107
323	323	1361	P08071	Lactotransferrin OS=Mus musculus OX=10090 GN=Ltf PE=1 SV=4	Ltf	77.8	8.53	1842	43	123	27	0	481.8	135	545		276	261.8	106.2	618.6		296	498.9	203.3	889.9		481.4	306.6	177.7	449.1		248.6	831.3	156.6	4669.4		580.9	409.1	121.2	725.1		308.9		1.17216	1.14124	1.56264	NA	1.04358	1.22991
324	324	4070	O35381	Acidic leucine-rich nuclear phosphoprotein 32 family member A OS=Mus musculus OX=10090 GN=Anp32a PE=1 SV=1	Anp32a	28.5	4.07	9946	43	679	16	4	25863.5	31066.9	27532.8	25626.9	13045.3	26236.7	26552.4	32707.6	34220.8	12537	33231.5	37554.2	37028.9	31457.1	16933.6	27880.8	26075.7	27941.1	24921.9	16978.1	20748.8	29946.2	13680.8	55754.7	13438.7	18797.6	26426.8	25606.7	38878	13957.6		0.782898	0.99527	0.716462	1.13609	1.11331	0.948807
325	325	302	P26043	Radixin OS=Mus musculus OX=10090 GN=Rdx PE=1 SV=3	Rdx	68.5	6.2	3725	42	239	28	1	459.2	1081	723.2	345	503.6	546.1	1107.6	677.6	277.7	579.2	630.7	1279.3	728.8	329.7	774.3	488.9	1202.8	692.2	408.3	515.5	606.9	1239.8	1383.4	313.4	828.4	574.1	1130	678.4	300.8	553.6		1.00118	1.02022	1.05127	1.08318	0.955801	1.02233
326	326	3092	Q8BLH7	HIRA-interacting protein 3 OS=Mus musculus OX=10090 GN=Hirip3 PE=1 SV=1	Hirip3	65.2	7.84	4945	41	247	22	0	5169.5	4867.4	2342	3250.1	3861.7	4431.7	5368.9	2848.1	3985.7	4244.9	2916.8	4663	3094.8	3067.6	2097.1	5027.6	4863.5	2449.7	3464.5	4228.5	944.1	4132.5	505.5	2863.9	2021.3	4370.8	4875.2	2781.5	4140.8	4210		0.976616	0.908044	0.986258	1.03891	0.991778	0.980322
327	327	2959	P29699	Alpha-2-HS-glycoprotein OS=Mus musculus OX=10090 GN=Ahsg PE=1 SV=1	Ahsg	37.3	6.51	7881	43	335	10	0	9426.1	11206.7	9102.4	16737.2	9974.5	8520.5	10264.8	10424.7	13129.4	9358.1	7401.9	10108.3	9134.4	11802.5	6687.2	8470.3	6718	7017.4	9410.1	10064.9	9428.3	11515.3	2731.2	15193.9	7014.9	7149	8980.7	5754.7	10680.1	10104.1		0.552025	0.874903	0.839035	0.813449	1.07972	0.831826
328	328	1660	Q99KN9	Clathrin interactor 1 OS=Mus musculus OX=10090 GN=Clint1 PE=1 SV=2	Clint1	68.5	6.25	6119	31	294	22	0	5322.9	6121.4	4209.9	3153.8	4833.5	5775.4	6755.5	4201.9	3947.5	5531.4	6885.5	8690	4638.3	4120.4	5242.3	4636.3	5782	4641.7	3500.6	4664.7	6265.1	7330.5	2976.4	4281.8	5481.5	5704.1	6423.6	4420	4189	6133.6		1.05191	0.95087	0.987655	1.06118	1.10887	1.0321
329	329	1244	Q00PI9	Heterogeneous nuclear ribonucleoprotein U-like protein 2 OS=Mus musculus OX=10090 GN=Hnrnpul2 PE=1 SV=2	Hnrnpul2	84.9	4.89	2924	27	113	17	0	231.5	387.9	608.4	212.4	169.3	298.8	499.7	815.8	432.8	310.8	330.9	687	844.6	345.8	203.3	272	387.7	748	311.2	247.4	473.1	598.6	3015	469.5	244.4	330.4	480.1	645.1	312.2	250		0.790758	0.960776	1.10576	0.721349	0.804376	0.876603
330	330	2021	Q9JHJ0	Tropomodulin-3 OS=Mus musculus OX=10090 GN=Tmod3 PE=1 SV=1	Tmod3	39.5	5.14	5600	52	357	21	1	3767.7	2939.8	3772.2	2678	3308.5	5876.8	3229.3	6067.9	3931.2	5171.7	6491.9	5126.7	7855.9	5075.3	8390.1	3874.5	2426.6	4168.4	2634.8	2293.5	9058.6	4236.7	5571.1	5295.1	8977.5	3880.2	3008.3	4380	3501.7	5044.7		0.721831	0.931564	0.660257	0.890746	0.975443	0.835968
331	331	313	P25206	DNA replication licensing factor MCM3 OS=Mus musculus OX=10090 GN=Mcm3 PE=1 SV=2	Mcm3	91.5	5.55	2202	39	131	22	0	404.4	163	276	119.4	284.1	526.7	235.8	386.6	96.9	398.4	741	272.8	457	84.5	737.3	427.6	128.6	295.9	82.6	293.2	499.7	387.2	461.7	127.1	651.1	510.2	180.4	227.8	82.4	307.5	Acetyl [N-Term]	0.58924	0.765055	0.968673	0.850361	0.771837	0.789033
332	332	579	Q8CHG3	GRIP and coiled-coil domain-containing protein 2 OS=Mus musculus OX=10090 GN=Gcc2 PE=1 SV=2	Gcc2	194.3	5.12	1188	22	120	34	0	438	516.2	239.9	104.2	535.4	585.5	501.7	323	124.7	695.7	550.6	583.1	339.3	85.3	556.5	433.4	453.2	267.1	120.4	467.7	528.5	538	175.5	101.5	612.8	478.7	550.3	269.8	116.7	638		0.835294	1.09687	0.817592	0.935846	0.917062	0.920533
333	333	2567	P17742	Peptidyl-prolyl cis-trans isomerase A OS=Mus musculus OX=10090 GN=Ppia PE=1 SV=2	Ppia	18	7.9	22662	63	1643	14	0	27905.7	28706.2	26992.2	33591.7	26102.5	26954.3	31837.2	29773.4	34083	31483.5	25459.4	30245.6	36698	34782	28505.3	27184.6	26549.4	29480	41517.3	34250.9	21512.4	30726.2	22874.7	39329.2	32071.4	22683.9	26656.2	25205.7	32564.1	29485.3	Acetyl [N-Term; N-Term]	0.846585	0.837266	0.841569	0.955435	0.936532	0.883477
334	334	2259	P80314	T-complex protein 1 subunit beta OS=Mus musculus OX=10090 GN=Cct2 PE=1 SV=4	Cct2	57.4	6.4	4200	51	195	20	0	656.6	756	1956	281.1	670.8	1195.5	731.4	2077.5	343.9	1022.1	2363.2	1170.4	2409.5	347	2479.4	1202.6	333.3	2202.6	282.5	615.9	1840.6	1692.4	6177.8	449.2	2431.7	1001.1	505.4	1538.6	250.2	726.9	Acetyl [N-Term]	0.740602	0.691004	0.83739	0.727537	0.711183	0.741543
335	335	792	Q06890	Clusterin OS=Mus musculus OX=10090 GN=Clu PE=1 SV=1	Clu	51.6	5.67	6790	39	318	18	0	6225.7	8405.3	6181.7	8503.2	6113.6	4682.1	5845.7	4805.5	5709.3	4989.6	4668.5	6092.6	4479.3	4981.1	4116.8	6061.6	5432.3	3949.8	4942.6	5256.1	7350.8	6795	1902.3	5928.2	3758.7	4869.8	5784.7	4301.5	4560.3	4124.6		0.89512	0.989565	1.04009	0.798749	0.826639	0.910033
336	336	3833	Q6NZJ6	Eukaryotic translation initiation factor 4 gamma 1 OS=Mus musculus OX=10090 GN=Eif4g1 PE=1 SV=1	Eif4g1	176	5.4	3147	18	219	26	3	3943.8	2014.8	3042.2	1393.2	3442.4	4099.1	2366.5	2745.2	1353.6	3370.7	3290.7	1908.6	2735.3	1234.7	2330.1	4416.4	2496.8	3519.6	1705.4	3433.2	2283	2090.7	1541.8	1057	2205.4	4452.1	2183.1	2867.6	1223.2	3001.6		1.04459	0.922502	1.08612	0.903664	0.890498	0.969473
337	337	4500	P61290	Proteasome activator complex subunit 3 OS=Mus musculus OX=10090 GN=Psme3 PE=1 SV=1	Psme3	29.5	5.95	7870	69	452	16	0	21193.9	13527.9	16152.6	21815.6	22782.9	7381.8	6128.3	4185.8	9109.2	6552.5	3743.9	3882.4	3282.9	8902.8	3318.9	14929.5	23562.7	9700.4	22842	17869.1	2523.3	3865.6	1540.9	5851.7	2773.6	16547.5	9320.4	13829.2	15728.6	7612.4	Acetyl [N-Term]	3.30384	1.52088	2.24166	1.72667	1.16176	1.99096
338	338	735	Q61074	Protein phosphatase 1G OS=Mus musculus OX=10090 GN=Ppm1g PE=1 SV=3	Ppm1g	58.7	4.39	4564	42	241	18	0	2831	2767.4	1680.7	1924.6	1372.1	4093.8	2963.6	2439	3256.6	1937.8	4293	3388.5	2410.5	2896.4	2318	3717.3	1750.7	1917.9	1658.2	1455.2	2825	3470.2	1510.8	4039.6	2152	2593.7	2580.9	1546.7	2470.6	1586.8		0.634153	0.870867	0.633568	0.758644	0.818867	0.74322
339	339	3675	Q69ZK6	Probable JmjC domain-containing histone demethylation protein 2C OS=Mus musculus OX=10090 GN=Jmjd1c PE=1 SV=3	Jmjd1c	260.5	8.07	2415	13	161	27	0	449.4	1466.5	962.8	1517	1116.8	389.7	1652.4	774.4	1170.2	1017.3	308	1398.1	786.8	1303.9	611.1	445.5	1821.2	1011.2	1612.5	1126.3	248.7	1271.6	533.3	1014.3	616.4	423.4	1578.6	981.6	1308.8	1001.7		1.26756	0.955338	1.08648	1.11844	0.984665	1.0825
340	340	1825	P00920	Carbonic anhydrase 2 OS=Mus musculus OX=10090 GN=Ca2 PE=1 SV=4	Ca2	29	7.01	5528	66	264	12	0	2420.5	1559.5	2916.6	2819.9	2275.6	3810.2	1320.8	3574.8	2211.4	2501	6207.5	2947.5	3892.1	2169.9	11768.1	3235.3	660.7	2943.5	1518.1	2212	7712.6	3502.2	8861.9	2799.9	8715.7	4710.1	1273.6	2766	2052.7	2622.4	Acetyl [N-Term]	0.77375	0.964264	1.23618	0.928236	1.04854	0.990194
341	341	1045	P17751	Triosephosphate isomerase OS=Mus musculus OX=10090 GN=Tpi1 PE=1 SV=4	Tpi1	32.2	5.74	9634	69	416	15	0	9339.3	9362.3	6169.8	10228.8	8891.3	9620.3	10093.8	7277.1	11827.9	11153.5	10867.2	11053.9	9135.9	11752.7	13765.1	9970.1	7852.4	6713.5	12479.4	10255.9	11370	11402.2	10363.5	13962.4	16061.7	7942.6	8151.3	5729.9	9964.2	9999.3		0.787388	0.807555	0.825608	0.842432	0.896517	0.8319
342	342	4182	Q3V3R4	Integrin alpha-1 OS=Mus musculus OX=10090 GN=Itga1 PE=1 SV=2	Itga1	130.7	6.2	2198	25	136	26	0	1743.8	614.2	1118.6	215.7	646.4	1957.5	575.1	1541.8	260.3	1030.5	1839.7	847.5	1488.5	348.8	1835.3	1514.8	428	1231.9	222.4	622.3	2602.6	903.4	1750.9	285.6	1756.5	2004	469.7	1278.8	217.2	921.4		0.82942	0.816728	1.02375	0.834422	0.894129	0.879691
343	343	2795	O08709	Peroxiredoxin-6 OS=Mus musculus OX=10090 GN=Prdx6 PE=1 SV=3	Prdx6	24.9	6.01	3826	68	229	15	0	2252.2	1323.8	2563.3	2102.8	2222	2189.1	1216.8	2419.3	1331.9	1881.3	2899.9	1175	2691.3	1906.7	3651.5	2289.9	1029.7	2421.7	1855.7	1932.9	3137.3	1412.6	5865.2	2504.9	3491.9	2174.3	1042.9	2020.6	1593.2	1925.4		0.8352	0.857084	0.993239	1.19619	1.02344	0.98103
344	344	1568	Q91VI7	Ribonuclease inhibitor OS=Mus musculus OX=10090 GN=Rnh1 PE=1 SV=1	Rnh1	49.8	4.78	2350	68	140	21	0	255.8	286.6	872.5	105.5	118.6	486.1	325.9	1089.9	67.5	216.4	805.8	503.6	1348.1	81.6	1103.2	339.7	238.9	884.7	74.1	99.2	1193	550.6	4991.2	66.5	1093.9	360.4	272.4	892.2	75.2	207.1	Acetyl [N-Term]	0.818607	0.835839	0.741411	1.11407	0.957024	0.893391
345	345	2879	Q7TMK9	Heterogeneous nuclear ribonucleoprotein Q OS=Mus musculus OX=10090 GN=Syncrip PE=1 SV=2	Syncrip	69.6	8.59	2257	33	161	18	0	1028.5	701.1	1329.3	595.5	1005.1	1148.7	824	1397.1	1016.4	1636.8	1473.8	836.2	1368.8	617.5	2045.6	1183.3	738.1	1483.1	557.6	1184.8	836.9	1041.2	3441.7	721.8	1871.1	1250.3	733.8	1448.1	819.3	1455.8		1.0365	0.890534	1.08845	0.80608	0.889418	0.942197
346	346	3633	P13864	DNA (cytosine-5)-methyltransferase 1 OS=Mus musculus OX=10090 GN=Dnmt1 PE=1 SV=5	Dnmt1	183.1	7.74	3143	17	154	23	0	1314.8	1439.9	1080.8	1812	2299.4	1294.6	1712.6	1042.6	1433.4	2650.5	1058.5	1785.4	1195.2	1966.6	1275.3	1223.4	1509.3	1192.2	1925.2	2615.7	318	1834.3	384.2	1508.1	1256.7	1260	1641.2	1029	1495.4	2298.5		0.986956	0.958309	0.973274	1.04325	0.867195	0.965797
347	347	3458	P07356	Annexin A2 OS=Mus musculus OX=10090 GN=Anxa2 PE=1 SV=2	Anxa2	38.7	7.69	5360	57	227	20	0	1405.2	2134.7	3098.8	749.6	859.1	1830.7	2824.1	5127.3	959.5	1340.8	1825	2517.5	3797.1	595.5	2227.1	1715.2	1678.6	4241.6	603.6	790.5	3169.4	3822.4	16210.4	1210.6	2114.9	1723.6	2208.6	3334.1	788.3	1204.1	Acetyl [N-Term]	0.650264	0.782054	0.941498	0.821574	0.898046	0.818687
348	348	1239	Q9Z1M8	Protein Red OS=Mus musculus OX=10090 GN=Ik PE=1 SV=2	Ik	65.6	6.64	2950	45	194	21	0	1515	1101.5	1744.7	1567.4	1712.8	1699.2	1137.7	1716.7	2194.8	2108.9	1743	1017.5	1520.5	2149.9	1548.6	1442.3	920.7	1919.5	1649.3	1833	1166	1086.9	1020.9	1877.1	1497.8	1669.1	1221.5	1681.9	2175.5	2141		0.979729	1.07366	0.982286	0.991206	1.01522	1.00842
349	349	3886	Q8CH25	SAFB-like transcription modulator OS=Mus musculus OX=10090 GN=Sltm PE=1 SV=1	Sltm	116.9	7.72	3152	21	167	21	0	963	1348	631.1	737.4	755.6	1109.9	1928	909.4	1226	1181.7	1038.4	2514.2	906.4	909.3	652.4	1054.5	1154	734.8	672.8	817.1	1243.5	2251.8	599.6	1050.2	804.8	1240.5	1810.8	786.6	1058.1	1136.4	Acetyl [N-Term]	0.864966	0.939212	1.11767	0.863051	0.961665	0.949312
350	350	4473	P10518	Delta-aminolevulinic acid dehydratase OS=Mus musculus OX=10090 GN=Alad PE=1 SV=1	Alad	36	6.79	9696	56	294	13	0	4003	2642.5	1898.5	1179.8	4376.1	2216.4	2003.4	1336.9	985.1	2255.6	1394.9	1458.3	1004.4	952.1	1815.7	4240.6	2414.8	1281.3	1140.9	3606.5	1615.2	1599.1	558.9	877.8	1645.2	4847.4	2095.2	2088.1	1007.2	2406.9		1.5619	1.04582	2.18706	1.02243	1.06708	1.37686
351	351	2738	P11983	T-complex protein 1 subunit alpha OS=Mus musculus OX=10090 GN=Tcp1 PE=1 SV=3	Tcp1	60.4	6.16	3468	47	202	20	0	1145.7	732.4	1811.1	247.2	736.8	2146.6	735.2	2189	274.2	976.3	4105.9	1191.8	2766.5	252.2	2978	1899.2	459.7	2067.9	208.4	932.3	3288.5	1572.4	7555.2	412.7	2893.4	1690.2	522.4	1275.5	257.6	916.4	Acetyl [N-Term]	0.582686	0.710555	0.787385	0.93946	0.938646	0.791746
352	352	574	P10852	4F2 cell-surface antigen heavy chain OS=Mus musculus OX=10090 GN=Slc3a2 PE=1 SV=1	Slc3a2	58.3	5.91	4370	41	247	22	0	3192.1	2735.1	3559.1	3427.3	2519	3908	2764.7	4280.5	4073.3	3239.8	4817.1	3034.3	3926.7	2832.3	4189	3565.2	1562.8	4289	1952.1	2672.7	2361.8	2866.2	2166.3	3949	3832.1	3863.6	2127.3	3795.9	4165.6	3620.7		0.886789	0.769451	0.988639	1.02266	1.11757	0.957021
353	353	2981	Q8CGC7	Bifunctional glutamate/proline--tRNA ligase OS=Mus musculus OX=10090 GN=Eprs PE=1 SV=4	Eprs	170	7.66	2133	20	117	22	0	165.7	221.6	337.3	28.6	235.2	198.1	265	304.3	42.4	260.7	165.3	242.8	253.2	24.4	322.8	178.9	261.5	325.2	29.7	206.9	179.6	291.4	654	94.9	359.7	210.3	262.5	263.1	46.9	233.8		0.864607	0.990566	1.06159	1.10613	0.896816	0.983941
354	354	2396	Q8K298	Anillin OS=Mus musculus OX=10090 GN=Anln PE=1 SV=2	Anln	122.7	6.98	2036	26	118	20	0	640.9	442.5	652.9	1356.7	819.8	490.8	362.4	487.8	916.8	540	386.6	348.3	490.5	849.5	257.1	565.8	462.5	652.1	1220.3	516.5	273.2	335	320.8	641.8	210.1	779.5	538.5	692.7	1259.4	571.1	Acetyl [N-Term]	1.42005	1.48593	1.58822	1.37369	1.05759	1.3851
355	355	3435	Q62230	Sialoadhesin OS=Mus musculus OX=10090 GN=Siglec1 PE=1 SV=2	Siglec1	182.9	6.67	2524	22	141	26	0	400	375.5	618.6	71.5	276.2	822.7	472.5	861.6	202.1	449.9	489.7	552.7	629.4	111.5	471.1	431.6	248.5	756.3	71.9	234.2	1208.6	530.7	734.6	141.7	671.3	607.1	401.4	695.7	140.2	360.2		0.807451	0.849524	0.737936	0.693716	0.800622	0.77785
356	356	2053	P80315	T-complex protein 1 subunit delta OS=Mus musculus OX=10090 GN=Cct4 PE=1 SV=3	Cct4	58	8.02	2787	47	170	22	1	440.4	1305.6	1194		336.3	823.6	1556.5	1301.6		436.9	1809.5	1923.5	1475.1		1237.8	818.8	1106.8	1410.7		375.7	1325.8	1938.3	3972.2		1106	722.8	1395.6	874.7		404.3		0.672019	0.896627	0.87761	NA	0.925383	0.84291
357	357	4602	Q99MI1	ELKS/Rab6-interacting/CAST family member 1 OS=Mus musculus OX=10090 GN=Erc1 PE=1 SV=1	Erc1	128.3	5.87	1416	26	103	25	0	389.3	277.8	231.5	99.6	687.4	557.7	355.6	323.6	132.2	728	365.6	331.5	297.4	138.4	520.6	375.7	191	281.5	96.4	479.4	612.8	316.8	113.7	152	536.8	498.9	351.9	305.6	137	667.4		0.944376	0.989595	0.894567	1.03631	0.916758	0.956321
358	358	4460	O08583	THO complex subunit 4 OS=Mus musculus OX=10090 GN=Alyref PE=1 SV=3	Alyref	26.9	11.15	8447	49	389	12	6	4600.4	9146.8	9531.4	4123.2	3870.1	5119.3	6946.9	10727.4	5548.8	4597.7	6402.9	6609.4	10863.3	5064.9	4416.9	7126.1	6713	10425.1	3934.9	4022.8	3847.6	7648.4	3409.3	7019.3	4562.8	3476.2	7403.2	9406	5473.2	4864	Acetyl [N-Term]	0.87682	1.06568	0.679038	0.986375	1.05792	0.933168
359	359	4561	Q8BH97	Reticulocalbin-3 OS=Mus musculus OX=10090 GN=Rcn3 PE=1 SV=1	Rcn3	38	4.88	7204	47	347	13	0	5929.5	4353.2	5755	3939.4	4053.7	5913.8	4745.1	6168.9	4696.4	5452.5	3738.6	4342.8	3870.5	3852	2627.7	4651.5	3964.2	5694.1	3486.3	4586.5	5074.5	4671	1599.6	3690.6	2454.4	5445.7	5445.8	6387.8	4269.6	4531.8		1.03548	1.14767	0.920846	0.909122	0.831142	0.968852
360	360	280	Q9D1J3	SAP domain-containing ribonucleoprotein OS=Mus musculus OX=10090 GN=Sarnp PE=1 SV=3	Sarnp	23.5	6.65	7246	68	446	18	0	16374.9	17593.5	16376.4	27290.7	17608.5	13674.1	18653.5	14788.6	23290.8	14554.9	10967.6	16874.4	14123	25211.2	8078.9	13638.4	18191.3	16520.9	28797.7	19292.4	9790.5	14889.3	2863.2	20435.7	8898.4	16192.5	18773.1	16339.3	24326.7	15412.2	Acetyl [N-Term]	1.10486	1.00641	1.18417	1.04448	1.0589	1.07976
361	361	3074	Q7TNC4	Putative RNA-binding protein Luc7-like 2 OS=Mus musculus OX=10090 GN=Luc7l2 PE=1 SV=1	Luc7l2	46.6	10.1	4100	36	204	15	6	3931.6	5080.2	3967.2	1793.3	3009.5	5983.4	5557.8	8178.1	3345.2	4655.3	5869.7	9116.8	9812.4	4275.9	7203.8	3768.7	2861.2	4438.9	1480.8	2350.1	5626.4	7304.2	3599.3	3880.7	7230.8	4574.8	5675.5	5649.7	3317.3	5661.4		0.690833	1.02118	0.764582	0.99166	1.21612	0.936874
362	362	1991	O55023	Inositol monophosphatase 1 OS=Mus musculus OX=10090 GN=Impa1 PE=1 SV=1	Impa1	30.4	5.19	7166	48	320	14	0	17115.7	9255.6	14015.3	15850.9	18072	1948.8	3454.7	863.7	4991.7	1605	1264.3	784.1	683	3837.7	1447.2	10768.9	18798.9	11472.5	17973.3	20626.9	1687.9	1218.1	2806.3	905.3	1503.5	14492.1	7189.7	10044.4	9753.5	1497.7	Acetyl [N-Term]	11.6295	2.08114	7.43642	1.95394	0.933146	4.80683
363	363	1963	P60843	Eukaryotic initiation factor 4A-I OS=Mus musculus OX=10090 GN=Eif4a1 PE=1 SV=1	Eif4a1	46.1	5.48	2908	52	189	19	10	1161.5	914.9	2176.2	388.1	443.5	2052.3	815.2	2215.3	431.7	719.1	4142.1	1247.4	2874	307.7	3075.2	2215.5	372.1	2376	278.3	520.7	3048.2	2013	9147.2	700.5	2581.7	1938.9	966.5	1269.3	258.9	600.9		0.57297	1.1856	0.944745	0.599722	0.835628	0.827733
364	364	4134	Q99JY9	Actin-related protein 3 OS=Mus musculus OX=10090 GN=Actr3 PE=1 SV=3	Actr3	47.3	5.88	3139	49	170	17	0	511.4	121.6	1225.4	223.8	550.8	889.8	147	1537	217.6	697.1	1645.8	220.9	1709.5	224.9	3061.1	689.3	91.6	1432.4	206.6	564.2	2824.6	304.6	13251.9	311.6	3470.3	750.4	116.8	1075.4	143.5	576.3		0.699675	0.794558	0.843336	0.659467	0.826711	0.764749
365	365	3570	Q9QZM0	Ubiquilin-2 OS=Mus musculus OX=10090 GN=Ubqln2 PE=1 SV=2	Ubqln2	67.3	5.22	5718	25	247	10	0	1831.2	1752.1	1735.9	2136.3	1504.7	1759.9	1820.4	1453.6	1711.1	1575.3	1072.7	1274.3	880.9	1651.5	970.5	1727.2	2094.9	1662.5	2174.1	1784	1707.1	1221.8	700.3	1780.7	1058.8	1807	1732.6	1789.4	1679.9	1466.1		1.23101	0.951769	1.02676	0.981766	0.93068	1.0244
366	366	1658	Q80X90	Filamin-B OS=Mus musculus OX=10090 GN=Flnb PE=1 SV=3	Flnb	277.7	5.71	1050	16	88	31	0	10.9		142.7		66.2	14.9		220.6		65.3	22.8		227.8		63.5	17.7		164.2		35.4	32.3		396.4		69.4	12.7		151.5		61		0.686763	NA	0.852349	NA	0.93415	0.824421
367	367	3469	P53996	Cellular nucleic acid-binding protein OS=Mus musculus OX=10090 GN=Cnbp PE=1 SV=2	Cnbp	19.6	7.58	10354	74	586	15	0	34913	23978.6	40181.2	44122.1	43513.8	25200.9	24513.4	28348	29191.2	32426.2	20568.7	17442.8	22835.4	28510.2	13046.5	29888.7	30665.2	27555	42293.6	26130.4	9985.6	17185.3	2904.3	21441.5	14038.4	29598.8	26501.9	33014.5	27506.2	33240.2	Acetyl [N-Term]	1.16461	1.08112	1.17451	0.942277	1.0251	1.07753
368	368	2664	P04919	Band 3 anion transport protein OS=Mus musculus OX=10090 GN=Slc4a1 PE=1 SV=1	Slc4a1	103.1	5.45	4357	28	208	17	0	4814.5	4033.6	5398.9	6627.5	4944.4	6748.4	4129	6745.8	3638.9	4196.4	3501	3917.7	5797.1	2519.1	3816.5	5859.2	1925.3	5724	1961.3	3928.4	6738.7	5068.2	6078.9	2963.5	3043.8	7498	4025.7	8342	4628	5911		1.23662	0.974982	1.11108	1.27181	1.40859	1.20062
369	369	3121	Q9QXS6	Drebrin OS=Mus musculus OX=10090 GN=Dbn1 PE=1 SV=4	Dbn1	77.2	4.49	2375	36	132	16	0	732.8	250.5	254.6	554.9	611.3	901.9	375.5	477.8	539.3	1039	793.7	479.7	480.7	653.1	828.3	764.9	163.7	315.8	482.2	691.1	1065.7	410.2	247.8	541	936.2	737.3	302.4	317	526.4	930.3		0.663458	0.805326	0.817496	0.97608	0.89538	0.831548
370	370	714	Q61768	Kinesin-1 heavy chain OS=Mus musculus OX=10090 GN=Kif5b PE=1 SV=3	Kif5b	109.5	6.44	925	32	82	26	3	128.9	54.2	276.5		99.6	340.5	133	454.8		131.4	481.5	209.8	456		176.1	1523.5	74.9	294.1		101.3	359.8	197.2	943.3		190.8	154.6	109.2	318.1		135.4	Acetyl [N-Term]	0.699428	0.821053	0.454038	NA	1.03044	0.75124
371	371	4419	Q8CHP5	Partner of Y14 and mago OS=Mus musculus OX=10090 GN=Pym1 PE=1 SV=2	Pym1	22.7	9.5	7830	74	279	12	0	5746.1	5582.3	8654.2	8882.9	6896.9	4689.4	5796.5	6238.6	6644.5	5472.9	3958.6	5464.3	5545.3	7061	2692.6	5636.6	6697.8	8369.2	9208.6	7994.6	3527.4	4336.8	1322.8	5288.3	3102.3	4933.4	5924.9	7879.1	6875.6	5712.1	Acetyl [N-Term]	1.26296	1.02215	1.05203	1.03478	1.04371	1.08313
372	372	1073	Q61554	Fibrillin-1 OS=Mus musculus OX=10090 GN=Fbn1 PE=1 SV=2	Fbn1	312.1	4.92	1610	13	117	30	0	518.2	389.6	208.9	200.5	340	540.8	528.9	334	317.7	381.9	574.5	821.9	381.8	251.3	442.1	398.8	351.3	324.3	242.2	327.9	989.1	644.3	290.7	396.8	485	639.8	528.6	283.7	215.9	337.3		0.849401	0.999433	1.18306	0.679572	0.883216	0.918937
373	373	1327	Q61545	RNA-binding protein EWS OS=Mus musculus OX=10090 GN=Ewsr1 PE=1 SV=2	Ewsr1	68.4	9.33	16593	23	595	13	0	13358.9	18213.5	14554.6	12005.6	12429.8	11483	16926.1	11359.1	9700.9	9721.7	10513.2	10030.4	10280.8	10606.3	6000.8	15696.2	18901.1	14298	12600.5	13506.7	8579.8	12878.6	2629	8908.3	5269.4	12399.4	15962.4	13592.2	10578.3	10116.3		1.19659	0.943064	1.0798	1.09045	1.04059	1.0701
374	374	52	Q6NXI6	Regulation of nuclear pre-mRNA domain-containing protein 2 OS=Mus musculus OX=10090 GN=Rprd2 PE=1 SV=1	Rprd2	156.5	7.59	3780	18	179	17	0	2130.8	2157.6	1505.4	2345.6	1785.7	1910	2401.9	1244.2	2047.4	1693.4	1661.8	2446.2	1219.8	2176.6	967.6	1898.6	2618.3	1763.4	2487.5	1795	1620.6	2113.3	425.5	1707.6	1196.6	2163.6	2371	1546.7	2141.3	1668.5		1.24313	0.987135	1.13277	1.04586	0.985296	1.07884
375	375	3807	Q80Y55	BSD domain-containing protein 1 OS=Mus musculus OX=10090 GN=Bsdc1 PE=1 SV=1	Bsdc1	46.9	4.4	3443	58	202	15	0	1893.6	550.9	1699.8	1465.7	1674.2	1547.6	460	1686.3	909.1	988.4	1161.1	495	1533.6	873.3	589.5	1666.4	466.9	1610.7	1117.2	1385.1	1181.5	420.1	864.2	681.2	627.5	2044.9	700.1	2039.1	1133.1	1135.5	Acetyl [N-Term]	1.20922	1.52196	1.32134	1.2464	1.14883	1.28955
376	376	3452	P35564	Calnexin OS=Mus musculus OX=10090 GN=Canx PE=1 SV=1	Canx	67.2	4.64	3321	33	225	22	0	2579.8	1365.2	2623.5	1672.9	1599.4	3907.1	1632.7	2966.4	1399	2679.3	4611.5	1887.8	3334.6	1203.6	5529.9	3184.5	1061.1	2766.4	1294.7	1667.8	4023.7	2295.7	9781.4	1296.2	5062.7	4027.4	1325.2	2793.8	1202.3	2345.8		0.941815	0.811662	1.03079	0.8594	0.875527	0.903839
377	377	1613	Q9ERH4	Nucleolar and spindle-associated protein 1 OS=Mus musculus OX=10090 GN=Nusap1 PE=1 SV=1	Nusap1	48.5	9.89	3942	52	214	18	0	1848.7	3283.6	2685.5	2401.9	1893.2	1235.4	2353.2	2225.5	2035.7	1318.2	1046.4	2237.2	1903.4	1617.3	622.3	1693.9	2914.6	2001.5	1809.7	1254.6	279.5	1973.5	308.5	1117	620.3	2182.3	3798.2	2967.9	2721.1	1511.9	Acetyl [N-Term]	1.33359	1.61406	1.76647	1.33669	1.14694	1.43955
378	378	4112	Q05186	Reticulocalbin-1 OS=Mus musculus OX=10090 GN=Rcn1 PE=1 SV=1	Rcn1	38.1	4.84	5026	45	254	14	0	3430.6	4189.8	3363.6	2166.9	2331.2	4603.9	5021.6	4244	3215.7	3666.5	3642.3	4756	3693.9	3206.2	2689.7	4313.3	3554.2	4270.4	2257.6	2240.5	5118.3	4706.8	1450.9	3270.7	2821.2	3068.6	4993.3	3774.9	2762	3324		0.889467	0.994364	0.666522	0.858911	0.906587	0.86317
379	379	3139	Q61598	Rab GDP dissociation inhibitor beta OS=Mus musculus OX=10090 GN=Gdi2 PE=1 SV=1	Gdi2	50.5	6.25	2752	55	184	20	4	497.9	122.2	1394.2	49.7	368.4	812	95.8	1483.4	56.9	490.2	1383.7	137.6	1913.5	62.5	2620.6	872.2	53.1	1602.9	78.8	374.3	1866.2	251.4	12415	90.2	2490.5	703.5	87.3	1075.4	33.8	417.3		0.724956	0.911273	0.866379	0.594025	0.851285	0.789584
380	380	3455	Q91ZX7	Prolow-density lipoprotein receptor-related protein 1 OS=Mus musculus OX=10090 GN=Lrp1 PE=1 SV=1	Lrp1	504.4	5.36	937	8	75	30	0	206.8	115.5	541		217.7	303.6	192.8	729		273.7	329	276.8	681.1		275.6	213.6	111.8	618		192.4	432.3	295.5	611.1		355.5	232.3	154.1	676.2		255.6		0.927572	0.799274	0.765152	NA	0.933869	0.856467
381	381	3321	Q60605	Myosin light polypeptide 6 OS=Mus musculus OX=10090 GN=Myl6 PE=1 SV=3	Myl6	16.9	4.65	29556	89	1825	13	5	23247.9	40586.1	29116.1	21768.9	20223.1	28694.4	45847.5	43343.6	42797.4	33845.6	28036.1	62420.5	44427.4	53653.9	41958.4	21745.2	28336.5	32246.1	20097	16731.5	39970.1	53614	15397.5	63145.2	44815.8	19933.4	44395.8	30405.8	39711.7	34060.7	Acetyl [N-Term]	0.701506	0.968336	0.694679	0.9279	1.00636	0.859755
382	382	894	P47753	F-actin-capping protein subunit alpha-1 OS=Mus musculus OX=10090 GN=Capza1 PE=1 SV=4	Capza1	32.9	5.55	3832	54	133	10	0	447.5	171.1	806.8	156.4	342.2	723.6	227.2	925.9	194.4	609.8	1260.3	353.8	1098.1	180.7	1723.2	548.2	142	939.6	168.1	434.5	1813.8	384.9	3172.4	231.3	1803.7	581	186.4	702.3	165.8	502.1		0.758505	0.820423	0.80293	0.852881	0.823385	0.811625
383	383	3728	Q9EQU5	Protein SET OS=Mus musculus OX=10090 GN=Set PE=1 SV=1	Set	33.4	4.32	10438	46	458	15	0	20627.6	19911.3	16755.2	6273.6	6002.4	20477.8	12386	19451.4	11019.7	7496.9	26618.9	21301.9	21346.2	12095.8	16926.1	20113.5	14557.3	14700.5	5843	5974.5	8762.5	19068.7	7490.5	18839.5	10012.5	17157.4	13810.8	19881.2	12965.5	10447.6		1.0221	1.11503	0.837854	1.17657	1.39359	1.10903
384	384	3372	Q6PDM2	Serine/arginine-rich splicing factor 1 OS=Mus musculus OX=10090 GN=Srsf1 PE=1 SV=3	Srsf1	27.7	10.36	22196	55	1229	19	0	35591.1	34808.2	39255.9	33932.4	31422.2	32766.2	35929.3	33904.4	29810.1	28953.8	28445.7	31902.5	32760.3	31165.9	19809.1	35239.3	36775.6	38923.9	31266.6	30130.4	21020.5	28815.1	7376.8	30697.9	20327.9	30103.7	34741.8	36986.8	31435.8	31866.2		1.09091	0.966949	0.918742	1.05454	1.10059	1.02635
385	385	2614	O08810	116 kDa U5 small nuclear ribonucleoprotein component OS=Mus musculus OX=10090 GN=Eftud2 PE=1 SV=1	Eftud2	109.3	5	1256	37	107	24	0	157.2	26.3	651.1		28.9	204	39.4	745.3		38.6	363.5	47	890.8		175.9	241.1	10.3	611.2		30.6	330.6	73.6	2364		164.9	207.3	23.2	486.9		23.7		0.653294	0.588832	1.01618	NA	0.61399	0.718073
386	386	49	P43274	Histone H1.4 OS=Mus musculus OX=10090 GN=Hist1h1e PE=1 SV=2	Hist1h1e	22	11.11	11630	49	577	18	0	5262.5	10494.1	9230.3	3911.3	3594.6	6159.6	8142.4	9560.4	5588.9	5618.1	6929.8	8502.4	10214.1	6774	5561.5	6950.6	7916.1	8514.2	4614.6	3692.7	6453.7	10666.1	11303.3	5750	5921.5	5629.2	8064.2	7679.7	5484.4	5659.1	Acetyl [N-Term]	0.803282	0.990396	0.913891	0.981302	1.0073	0.939234
387	387	1526	Q05816	Fatty acid-binding protein, epidermal OS=Mus musculus OX=10090 GN=Fabp5 PE=1 SV=3	Fabp5	15.1	6.54	4147	77	177	13	0	1605.7	1280	1465.9	1568.2	1701.9	3688.6	2145.7	2726.6	2512	2818.7	2542.7	1495.9	2381	2391.3	3437.5	2045.1	890	1538	2023	1469.2	4655.5	1939.2	1763	3603.8	3393.5	2258.2	1714.9	2322.8	2346	2751.4		0.851903	0.799226	0.612211	0.933917	0.976124	0.834676
388	388	1072	Q8BU04	Putative E3 ubiquitin-protein ligase UBR7 OS=Mus musculus OX=10090 GN=Ubr7 PE=1 SV=1	Ubr7	48	4.75	3290	48	222	21	0	2128.5	1651.8	1408	848.2	1434.8	2782.9	1386.9	2166.6	1303.6	2359.9	2928.7	1872.5	2604.9	1700.6	1943	2400.9	854.5	1471.9	728.4	1290.2	1606.8	1839.8	482.7	1591.8	1843.4	1978.7	1172.2	1587.3	1215.7	2588.8		0.732623	0.845194	0.711021	0.932571	1.097	0.863681
389	389	1458	P01872	Immunoglobulin heavy constant mu OS=Mus musculus OX=10090 GN=Ighm PE=1 SV=2	Ighm	49.9	7.01	4430	38	247	16	0	1705	857.4	1063.6	693.8	1661.1	3542.3	1330.3	2818	1612.5	2567.1	12715.7	3324.3	6407.6	3220.6	13116.3	1251.8	726.9	2260.5	863.6	1476.9	21303.8	3069.3	16936.2	5872.4	19073.5	2769.8	1068.2	2157.4	1234.1	2555.5		0.765578	0.802977	0.781921	0.765333	0.995481	0.822258
390	390	4653	P06151	L-lactate dehydrogenase A chain OS=Mus musculus OX=10090 GN=Ldha PE=1 SV=3	Ldha	36.5	7.74	6295	47	275	17	1	1517.7	1388.4	3005.7	931.1	948.8	2730.5	1335.3	2870.8	901.8	1579.6	5723.2	2030.7	3730.2	834.8	8109.4	3140.7	749.5	3684.2	1046.5	1160.7	5583.6	3043	15217.3	1326.4	7058.8	2331.3	878.7	1768.2	575.1	1260	Acetyl [N-Term]	0.615926	0.658054	0.8538	0.637725	0.79767	0.712635
391	391	4458	Q9JKR6	Hypoxia up-regulated protein 1 OS=Mus musculus OX=10090 GN=Hyou1 PE=1 SV=1	Hyou1	111.1	5.19	2138	29	161	22	0	1169.8	852.3	810.3	809.4	611	1637.6	1243.1	1080.6	1012.9	764.4	1705.2	1511.4	1191.7	1137	813.8	1119.4	920.4	943.9	928.4	532.9	1982.9	1544.5	2504.7	1091.1	853	1758	1120.1	896.6	881.1	747.4		0.829724	0.901054	1.07352	0.869879	0.97776	0.930388
392	392	3673	Q8BMK4	Cytoskeleton-associated protein 4 OS=Mus musculus OX=10090 GN=Ckap4 PE=1 SV=2	Ckap4	63.7	5.64	2641	46	156	23	0	1221.9	1277.3	1756.2	692.6	1314.5	1666.6	1347.9	2167.1	894.9	1925.9	2046.2	1993.8	2159.5	735.7	1991.6	1099.2	1150.6	2076.4	586.8	1137.5	1347	1767.5	2052.1	624.4	1847.1	1549.9	1406.3	1857.6	854.8	1804.4		0.857182	1.04333	0.929977	0.955191	0.936913	0.944518
393	393	4349	Q3U2S4	OTU domain-containing protein 5 OS=Mus musculus OX=10090 GN=Otud5 PE=1 SV=2	Otud5	60.3	6.54	4468	33	156	12	0	963.3	1737.3	751.9	2602.2	1582.1	662.2	1487.9	618.5	1382.7	1131.6	502	1407.1	491.6	1146	587.7	828.4	1324.8	673.4	2087.6	1661.2	312.1	1307	134.7	1120.4	526.1	1018.7	1713.4	798.3	1927.6	1218.9		1.2907	1.15156	1.53836	1.39408	1.07715	1.29037
394	394	3224	O08692	Neutrophilic granule protein OS=Mus musculus OX=10090 GN=Ngp PE=1 SV=1	Ngp	19.3	5.31	10321	73	488	20	0	7836	11713.8	7864.6	4055.8	4677.8	4570	12677.1	6424.8	8670.9	8842.2	18425.3	18915.8	15746.2	12417	12505.8	6284.8	10709.2	5186	4193.9	4553.5	28879.8	9760.8	9567.7	22553.2	14261.6	7274.4	7932.3	7844.4	5977.8	12927.4		1.22096	0.625719	1.59177	0.689409	1.46201	1.11797
395	395	3322	O35737	Heterogeneous nuclear ribonucleoprotein H OS=Mus musculus OX=10090 GN=Hnrnph1 PE=1 SV=3	Hnrnph1	49.2	6.3	4187	46	193	14	9	1285.1	2012.1	2366.7	1707.1	1136.6	1806.5	2406.4	3314.7	4734.8	3637.7	2212.1	2712	3593.9	2348.6	2840.9	1377	1406.2	2453.9	1385.4	1262.6	1905.1	2983.4	4812.3	3345.9	2925.3	1987.8	2364.5	2809.7	3667	3612.2	Acetyl [N-Term]	0.847648	0.982588	1.10036	0.774478	0.99299	0.939613
396	396	3195	Q9R020	Zinc finger Ran-binding domain-containing protein 2 OS=Mus musculus OX=10090 GN=Zranb2 PE=1 SV=2	Zranb2	37.3	9.89	4548	40	212	16	0	4099.7	3752.4	3857.4	1717	2251.4	3386.1	2782.4	3428.5	1902.2	2395.3	2358.1	1725.6	2801.4	1056	919.7	4664.7	3757.4	3729.4	1615.7	2430.7	875.4	2436.9	1087.9	1351.4	906.2	3380	2777.1	3943.7	1961.6	2156.9		1.15027	0.998095	0.998199	1.03123	0.900472	1.01565
397	397	2418	P62897	Cytochrome c, somatic OS=Mus musculus OX=10090 GN=Cycs PE=1 SV=2	Cycs	11.6	9.58	10073	54	688	10	0	20549.3	14196.4	20192.5	19704.1	24011.7	13005.5	14149.2	14328.8	15547.1	15733.7	7798.2	8422.5	11863.2	16188.5	7349.8	15344.8	19274.5	15137	19399.7	21091.9	7243.1	9342.6	3613.5	12470.2	7279	18922.1	14880.6	19129.5	17132.7	16497.3		1.33504	1.05169	1.45493	1.10199	1.04853	1.19844
398	398	3808	Q9D154	Leukocyte elastase inhibitor A OS=Mus musculus OX=10090 GN=Serpinb1a PE=1 SV=1	Serpinb1a	42.5	6.21	2732	45	161	19	0	607.6	144.5	1208.7	56	400.3	832	118.5	1191.4	51.3	476.5	1613.8	216.1	1552.5	79.8	2468.3	967.1	113.4	1253	55.9	333.2	2627.3	279.1	8246.7	94.3	2539.5	666	88.9	1100	65	375.1		0.923284	0.750211	0.800481	1.26706	0.787198	0.905646
399	399	376	Q00899	Transcriptional repressor protein YY1 OS=Mus musculus OX=10090 GN=Yy1 PE=1 SV=1	Yy1	44.7	6.29	3408	50	201	18	0	4009.1	4199.9	2766.8	2493.7	3886.6	4121.3	5033.9	2998.6	2636.1	3580.7	2954.2	2630.4	2873.2	1686.9	1774.9	5098.8	3702.1	2756.2	2358.4	3368.7	2561.3	2912.1	1222.8	2157.1	1974.9	3333.3	4329.7	3048	2595.7	3846.7		1.01647	0.860108	0.808798	0.984674	1.07429	0.948868
400	400	4304	P15864	Histone H1.2 OS=Mus musculus OX=10090 GN=Hist1h1c PE=1 SV=2	Hist1h1c	21.3	11	13178	50	598	18	0	5351.2	8674.3	7117.7	5476.1	4227.6	5029.2	5812.4	5117.4	6140.5	5690.3	8645	5217.2	5289.5	5856.4	9030.2	7937.8	7756.1	6154.1	5521.9	4272.2	4931.3	8767.6	13256.6	6872.3	8219.7	4439.3	6015.6	5089.1	6177.8	5583.9	Acetyl [N-Term]	0.99447	1.03496	0.882705	1.00607	0.981302	0.979902
401	401	1321	P22907	Porphobilinogen deaminase OS=Mus musculus OX=10090 GN=Hmbs PE=1 SV=2	Hmbs	39.3	6.87	4375	55	341	20	0	17871.3	7265	8342.1	16442.1	20081.3	3879.1	2064.8	2133.4	3539.3	3178.1	2060.6	1308.7	1188.8	2488.2	2162.2	13924.6	11748	3363.4	15936.2	12920.2	2079.2	2169.3	1169.1	1902.1	1395.6	23509.2	3869.3	7869.9	8357.1	3418.6		3.6889	1.87393	6.06048	2.36123	1.07567	3.01204
402	402	3307	Q61191	Host cell factor 1 OS=Mus musculus OX=10090 GN=Hcfc1 PE=1 SV=2	Hcfc1	210.3	7.18	3368	13	180	20	0	1586.1	1404.6	1177.5	2375.6	1787.2	1711.2	1674.3	1242.2	2236.5	1912.9	1909.2	1837.5	1249.1	2519.1	1587.2	1565.3	1889.2	1533.6	2726.2	2018.4	2353.8	1574.7	810.9	2279.2	1867.8	1700.6	1564.5	1290	2137.1	1685.4		1.03848	0.93442	0.993806	0.955556	0.881071	0.960666
403	403	3611	Q99KI0	Aconitate hydratase, mitochondrial OS=Mus musculus OX=10090 GN=Aco2 PE=1 SV=1	Aco2	85.4	7.93	2085	37	127	25	0	432.6	193.3	1031.3	52.5	68.4	556.7	197.5	1411.3	63	159.1	740.3	343.5	1557.3	59	728.6	489.1	95.4	1195.4	53.1	99	876.3	509.6	8810.9	78.4	742.1	515.5	141.8	801.8	49.1	109.1		0.568129	0.717975	0.925992	0.779365	0.685732	0.735439
404	404	3008	Q8BP27	Swi5-dependent recombination DNA repair protein 1 homolog OS=Mus musculus OX=10090 GN=Sfr1 PE=1 SV=2	Sfr1	35.2	5.15	5492	57	280	20	0	5298.3	9012.8	3386.7	5096.9	5354.8	4372.3	7703.7	3254.6	5423.6	4586.8	3566.3	7903	3007	5502.1	2491.9	4563.6	8578.3	3320.1	4196.4	4486.8	2305.3	6577.5	555.1	4457.3	2669.2	5029.7	9194.5	3528.1	5540.7	5197	Acetyl [N-Term]	1.08403	1.19352	1.15036	1.02159	1.13303	1.11651
405	405	1648	Q8VDY9	Caspase activity and apoptosis inhibitor 1 OS=Mus musculus OX=10090 GN=Caap1 PE=1 SV=2	Caap1	37.8	4.72	2489	53	181	14	0	3968.4	2114.5	1466.5	4023.1	3174.8	5071.7	3025.4	1832.8	5120.1	4069.9	2716.4	1971.1	1231.3	3466.3	1591.4	3539	2203.6	1420.5	3816.7	3038.2	2641.5	1745.4	416.9	3860.4	1672.7	4616.4	3215.1	2197.2	5423.8	4403.9		1.19882	1.0627	0.910227	1.05932	1.08207	1.06263
406	406	2347	P23198	Chromobox protein homolog 3 OS=Mus musculus OX=10090 GN=Cbx3 PE=1 SV=2	Cbx3	20.8	5.22	9226	44	561	10	0	2264.8	1639.3	1991.2	1791.5	1291.8	4456.8	2068	5930.5	3693.4	3922.5	6390.3	4738.5	9681.6	5026.2	11830.7	2229.6	930	2314.6	1536.6	1360	8446	3845.9	7100.3	6431.5	12981.4	2672.2	1785.8	2369.9	2815.4	4200.3		0.399612	0.86354	0.599578	0.762279	1.07082	0.739166
407	407	1666	Q00898	Alpha-1-antitrypsin 1-5 OS=Mus musculus OX=10090 GN=Serpina1e PE=1 SV=1	Serpina1e	45.9	5.73	8634	28	380	11	9	10832.4	13174	11515.7	6509.4	6095.6	15157.1	11982.9	17472.5	8999.5	11221	24135.6	17663.9	23413.9	11711.4	21889.9	11120.5	8364	8593.5	4329.6	6250.8	35013.6	26807.6	14976.8	17390.7	16304.5	11604.8	8392.7	9694.4	6506	10625.7		0.554838	0.70039	0.765635	0.722929	0.946948	0.738148
408	408	495	Q8VIJ6	Splicing factor, proline- and glutamine-rich OS=Mus musculus OX=10090 GN=Sfpq PE=1 SV=1	Sfpq	75.4	9.44	2515	30	200	21	1	4453.5	3528.5	2827.8	1406.7	2421.2	4297	4355.9	2876.5	2164.6	3121.3	4624.8	3820.5	2997.2	1705.3	4890.7	5090.7	4182.9	3544	1789.2	2433.1	4159.2	4705.9	6049.9	1672.3	4818.7	5082.3	3939.2	3026.5	2095.9	2900.7		1.05215	0.904337	1.18276	0.968262	0.929324	1.00737
409	409	3967	Q9CYA0	Cysteine-rich with EGF-like domain protein 2 OS=Mus musculus OX=10090 GN=Creld2 PE=1 SV=1	Creld2	38.2	4.58	6308	38	282	16	0	5371.7	4501	3917.7	3980.2	5002.7	6395.6	5832.3	4580.7	6676.6	5266.8	6158.9	5532.5	3895.2	6377.6	3299	4452	4465.9	4861.1	4565.9	3442.8	7754.4	5168.7	1314.9	7386.1	4031.3	5520	6109.7	5474.2	5789.7	5330.3		1.19506	1.04756	0.863093	0.867163	1.01206	0.996987
410	410	310	Q3UTJ2	Sorbin and SH3 domain-containing protein 2 OS=Mus musculus OX=10090 GN=Sorbs2 PE=1 SV=2	Sorbs2	132.3	8.53	4409	19	194	18	1	994.2	731.8	959.2	1275.1	937.2	1315.6	1206.6	1458.6	1684.9	1769.5	1434	1494.8	1630.7	2023.8	1660.8	940.4	630.6	1188.3	1429.1	1012.1	3019.9	1368.3	2229.7	1551.5	1939.8	1397.7	1001.2	1280.2	1538.1	1520.4		0.877691	0.82977	1.0624	0.912873	0.859226	0.908393
411	411	2361	P01942	Hemoglobin subunit alpha OS=Mus musculus OX=10090 GN=Hba PE=1 SV=2	Hba	15.1	8.22	67903	75	4525	13	0	52309.3	67081.6	50712.6	99088.8	145385	46413.7	43823	57117.4	70852.9	113327	50840.3	69552.9	61268.6	96693.6	155956	41897.6	67475.9	44375.1	76798.6	123973	45597.5	52688.2	74177.1	71343	134810	54880.3	62151.8	64222.4	80421.7	134594	Acetyl [N-Term]	1.12439	1.41825	1.18242	1.13505	1.18766	1.20955
412	412	4272	Q9Z0M6	CD97 antigen OS=Mus musculus OX=10090 GN=Cd97 PE=1 SV=2	Cd97	90.4	7.39	2450	27	191	15	0	1012.7	794.7	736.8	543.3	837.4	1533.8	1184.6	1220.7	864.2	1813.4	1704.8	1593.9	1191	1165.5	1607.7	969.1	531.8	868	425.6	880.9	1838.3	1279.6	821.6	1198.4	2025.1	1129.2	943.1	853.9	794.8	1717		0.699517	0.796134	0.736211	0.919695	0.94684	0.819679
413	413	3231	D3Z6Q9	Bridging integrator 2 OS=Mus musculus OX=10090 GN=Bin2 PE=1 SV=1	Bin2	52.5	5.34	9661	38	305	18	0	3212.7	2904.8	3408.8	3386.8	3731.7	3963.5	4244.5	3830.8	4191	4149.4	4215	6185.3	4186.5	5889	4109.7	2899.4	3585.6	4100.9	4529.1	3397.4	7842.1	5057.2	5718.4	5136.9	4818.1	4389	4282.5	3698	3887.6	3935.1		0.965334	1.00895	1.10735	0.927607	0.948354	0.99152
414	414	3468	E9Q555	E3 ubiquitin-protein ligase RNF213 OS=Mus musculus OX=10090 GN=Rnf213 PE=1 SV=2	Rnf213	584.4	6.8	1803	5	130	21	0	1717.2	2415.2	674.8	835.8	2006.8	2570.5	3816.6	742.6	979.3	1438.9	1011.4	2755.9	619.6	1130.7	1065.3	1603.8	2927.7	679.5	1189.4	1018.6	1259	3424.5	1137.5	647.8	935.6	2630.3	4387.3	805.4	993.6	1364.5	Acetyl [N-Term]	1.08457	1.14953	1.02326	1.0146	0.948294	1.04405
415	415	3618	Q60952	Centrosome-associated protein CEP250 OS=Mus musculus OX=10090 GN=Cep250 PE=1 SV=4	Cep250	276.6	5.07	1191	13	103	21	0	303.6	117.5	119.8	553.6	541.1	243.2	119.6	137.9	359.9	446	169.1	123.4	110.1	314	288.3	312.9	96	100	458.2	502.6	231.3	92.8	106.9	329.7	366.2	368.7	152.5	145.7	492.4	432		1.05656	1.27508	1.51604	1.36816	0.96861	1.23689
416	416	2787	Q3TGF2	Protein FAM107B OS=Mus musculus OX=10090 GN=Fam107b PE=1 SV=2	Fam107b	15.6	8.31	8647	78	563	17	0	20839.3	14893.1	16133.5	21979.8	14520.9	17722.9	16577.5	13816.4	20795.6	15549.6	15698.9	18663.8	14284.1	22819.5	8199.9	18099.1	19027.5	15751.1	22686.3	16307.8	11866.8	13619.5	2604	18003.5	9690.3	16707.1	16786.6	15940.2	20824.7	16525	Acetyl [N-Term]	1.15372	1.01261	0.942684	1.0014	1.06273	1.03463
417	417	2909	Q925J9	Mediator of RNA polymerase II transcription subunit 1 OS=Mus musculus OX=10090 GN=Med1 PE=1 SV=2	Med1	167	8.73	2282	20	153	23	0	1060.9	930.8	312.6	1293.6	1875.6	1053	960.2	254.9	1199.8	1795.5	932.8	906.2	262	1296.6	844.1	1021.6	1045.3	362.6	1311	1866.2	646.3	884.5	328.8	961.8	913.7	1169	981.4	321.2	1108	1744.4		1.2601	1.02208	1.11016	0.923487	0.97154	1.05747
418	418	4237	Q8BGT7	Survival of motor neuron-related-splicing factor 30 OS=Mus musculus OX=10090 GN=Smndc1 PE=1 SV=1	Smndc1	26.7	7.24	5788	51	243	11	0	7268.4	4256.9	4878.6	6615.9	7041.7	5952.1	4244.7	3853.5	5657.2	6221.1	4408.7	3217.9	3299.8	6064.4	2709.8	6798.7	4821.9	4729.6	6887.7	7728.7	3089.5	3122.8	626.6	4466	2966.2	6247.8	4245.7	4700.5	5915.2	6500.6		1.2198	1.00024	1.04968	1.04561	1.04493	1.07205
419	419	2388	P16045	Galectin-1 OS=Mus musculus OX=10090 GN=Lgals1 PE=1 SV=3	Lgals1	14.9	5.49	9551	94	749	12	0	18316.6	21616.3	20353.8	15321.9	12078.5	20673.7	22015	32580.4	24957	24218.6	20146.3	28897.7	39442.9	33217.8	20667.2	16129.6	16372.6	22558	13829.4	13103.1	16746	32915.8	10562.4	50339.1	21676.4	16871.5	19226.7	19382.5	24470.1	25047.2	Acetyl [N-Term]	0.594913	0.873345	0.816085	0.98049	1.03421	0.859809
420	420	479	Q7TNV0	Protein DEK OS=Mus musculus OX=10090 GN=Dek PE=1 SV=1	Dek	43.1	6.86	5497	34	300	16	0	7095.4	4301.6	4853.9	3522.1	4249.9	6094.4	3145.3	5627.1	3589.8	3672.6	8296.7	5435.4	7522.2	4620	8463.3	5930.7	3230.8	4443.6	2918	3309.2	5696.4	4627.5	4778.1	4356.7	6458.9	8762.8	3586.8	4652.1	4469.2	4294.9	Acetyl [N-Term]	0.826731	1.14037	1.43784	1.24497	1.16944	1.16387
421	421	3221	Q9D6Z1	Nucleolar protein 56 OS=Mus musculus OX=10090 GN=Nop56 PE=1 SV=2	Nop56	64.4	9.14	2246	36	127	17	0	634.8	220.9	855.2	803.3	467.7	769.2	284.9	992	816.1	636.6	1036.8	392.6	1106.9	801.9	759.4	724.8	256.6	1005.1	745.4	489.9	957.3	327	2336.3	690.8	833.2	859.8	319.3	882.7	758.3	615.4		0.889819	1.12074	1.11778	0.929175	0.966698	1.00484
422	422	3542	Q9D8X2	Coiled-coil domain-containing protein 124 OS=Mus musculus OX=10090 GN=Ccdc124 PE=1 SV=1	Ccdc124	25.3	9.64	7154	58	341	22	0	5875	7533.1	4678.9	6527.9	7271.7	5390.5	7395.4	4093.5	5838.8	6215.7	4826	6727.3	3815.6	5659.2	3023	5910.8	7489.6	4535.3	6374.4	6099	3211	6247.4	1081.9	4696.7	3383.2	5636.6	8114.5	4756.7	5987.5	6043.7		1.16201	1.09724	1.04565	1.02547	0.972328	1.06054
423	423	4690	Q6A028	Switch-associated protein 70 OS=Mus musculus OX=10090 GN=Swap70 PE=1 SV=2	Swap70	69	6.05	2269	37	135	23	0	337.1	252.9	562.6	70.7	173	478.5	356.5	779.8	101.5	233.1	699.9	503.8	1005.2	100.5	672.9	387.1	299.8	756.7	69	187.6	1074.8	479.9	2966.2	148.6	641.6	451.9	338.6	622.5	79.7	241.8		0.798282	0.94979	0.94441	0.785222	1.03732	0.903005
424	424	4055	P11087	Collagen alpha-1(I) chain OS=Mus musculus OX=10090 GN=Col1a1 PE=1 SV=4	Col1a1	137.9	5.85	5348	17	264	22	0	6117.3	7761.1	3617.4	7009.8	6007.9	7133.1	8280.8	2981.8	6922.4	11086.1	5916.2	11758.8	2846.8	7782.7	6918.2	6643.1	10389.9	7142.7	8159.7	7597.5	11087.3	14001.2	1071.3	7421.4	3466.5	10152.6	13727.7	8593.9	5982.8	7861.3		2.88212	1.65777	1.42331	0.864267	0.709113	1.50732
425	425	2201	Q64511	DNA topoisomerase 2-beta OS=Mus musculus OX=10090 GN=Top2b PE=1 SV=2	Top2b	181.8	8.29	1947	18	149	24	0	598.6	448.2	584.8	1056.6	523.6	633.9	569.9	594.2	1964.7	875.9	674.7	627	551.1	1207.3	582.4	531.8	477.1	569.3	1027	597.4	572.2	695.5	755.3	1468.8	668.5	889.2	573.5	719.8	1728	885.7		1.21138	1.00632	1.40274	0.879524	1.01119	1.10223
426	426	3763	Q9D0E1	Heterogeneous nuclear ribonucleoprotein M OS=Mus musculus OX=10090 GN=Hnrnpm PE=1 SV=3	Hnrnpm	77.6	8.63	4733	31	231	21	0	2471.5	2563.7	2371.3	2486.1	3700.3	2859.8	2061	2549	2218.6	4636.3	2993.3	2709.7	2878.7	2663.2	5577.8	2572.4	1787.7	2771.1	2682.5	4005.8	3109.8	2590.1	6930.9	2306.7	5823.9	2740.4	2040.2	2797.1	2087.2	3993.7	Acetyl [N-Term]	1.09733	0.989908	0.958249	0.940773	0.861398	0.969532
427	427	573	P19426	Negative elongation factor E OS=Mus musculus OX=10090 GN=Nelfe PE=1 SV=2	Nelfe	42.5	9.38	3518	59	163	17	0	1608.6	1366.5	1666.5	3116.8	1320.4	1628.3	1454.6	1401.8	3267.8	1319.9	1573.6	1268.2	1387.3	3356.2	910.5	1625.3	1416.5	1689.8	3142.2	1457.1	1411.8	1191.2	530	2816.5	974.6	1469.7	1481.1	1711.6	3356.2	1300.5		1.221	1.01822	0.902598	1.02705	0.985302	1.03083
428	428	1169	P97447	Four and a half LIM domains protein 1 OS=Mus musculus OX=10090 GN=Fhl1 PE=1 SV=3	Fhl1	31.9	8.37	4713	64	235	15	0	9616.3	1813.7	5078.6	3646.4	4025.5	4869.7	3322.6	4478.1	4340	9366.1	6007.2	1070.3	4082.6	4641	6631.3	8827.4	1453.1	5636.9	8215.3	8730.4	5084	1282.8	4071.6	8673.8	5836.8	9342.4	1379.2	2794.9	7609.7	6114.2		0.624126	0.415097	1.91848	1.75339	0.652801	1.07278
429	429	2737	Q9CQV8	14-3-3 protein beta/alpha OS=Mus musculus OX=10090 GN=Ywhab PE=1 SV=3	Ywhab	28.1	4.83	5067	61	271	13	0	793.7	213.8	813.3	173.4	381.5	1201.1	231.5	1117.9	274.5	634.4	1928.6	466.7	1566.3	202.9	2588.5	1094.3	130.5	1016.1	117.2	363	3032.4	547.4	6784.8	307.8	2645.4	1109.5	181.4	731.4	204.8	530.7		0.654262	0.783585	0.923737	0.746084	0.836538	0.788841
430	430	2971	Q64318	Zinc finger E-box-binding homeobox 1 OS=Mus musculus OX=10090 GN=Zeb1 PE=1 SV=1	Zeb1	122.4	4.88	1399	29	123	19	2	691.9	206.8	362.3	1410	973.3	641.4	292.6	381.5	1375.7	1013.6	525.3	286.6	318.8	1491.4	878.9	536.1	171.8	323.2	1474.1	812	460.1	251.6	95.2	1233.4	884.8	724.3	253.9	350.3	1495.9	1046.3		0.918218	0.867738	1.12925	1.08737	1.03226	1.00697
431	431	2700	P14602	Heat shock protein beta-1 OS=Mus musculus OX=10090 GN=Hspb1 PE=1 SV=3	Hspb1	23	6.55	6906	64	354	14	0	7756.3	6028.8	9392.1	7418.2	7734	7516.7	7491.2	11732.8	8575.3	11016.6	7698	7346.9	12108.7	12524	6614.1	6990.4	6587.8	7686.6	6148	7394.1	7219.2	8273.7	3854.8	11234.3	6501.3	8011.3	8759.7	10581.8	9439.5	7825		0.901899	1.16933	1.0658	1.10078	0.710292	0.98962
432	432	3920	Q9DB15	39S ribosomal protein L12, mitochondrial OS=Mus musculus OX=10090 GN=Mrpl12 PE=1 SV=2	Mrpl12	21.7	9.29	5441	49	325	10	0	13454.7	15998	16549.6	20884.7	15199.1	11024.9	15227.1	14082.5	17782.5	14219.6	9312.6	13924.8	13869.1	17850.4	7543.1	11623.3	17454.2	15424.7	22831.1	15849.9	4864.6	12916.1	2257.4	16134.5	7912.2	10955.3	15432.2	13892.6	17149.8	14343.7		0.986515	1.01347	0.993687	0.96442	1.00873	0.993364
433	433	1502	P70296	Phosphatidylethanolamine-binding protein 1 OS=Mus musculus OX=10090 GN=Pebp1 PE=1 SV=3	Pebp1	20.8	5.4	7926	90	323	12	0	4171.1	2831.1	4062.8	4159.4	3103.1	4369.6	2929.2	4424.9	4593.1	4070.9	6241.6	3131.3	5524.1	5079.8	4752.2	4573.6	2172.5	4707.8	4710.2	3276.2	5442.4	3108	3737.4	6631.6	5272	3539.6	2291.5	2998.7	4383.3	4192	Acetyl [N-Term]	0.677688	0.782296	0.810051	0.954323	1.02975	0.850821
434	434	3356	P60840	Alpha-endosulfine OS=Mus musculus OX=10090 GN=Ensa PE=1 SV=1	Ensa	13.3	7.24	5001	83	326	18	2	11380.8	7780.6	10549.4	9342.3	11517.3	11504.7	8272.5	8736.8	7462.3	9004	9452.9	7912.4	8678.9	8378.4	5816.1	11956.5	8895.2	10212.1	8503.2	11082.7	10136.6	6606.7	2318.4	6842.9	6100.4	10375.7	8187.2	10200.7	7471.5	9480.9	Acetyl [N-Term]	1.16756	0.989689	0.901866	1.00123	1.05297	1.02266
435	435	4149	O70591	Prefoldin subunit 2 OS=Mus musculus OX=10090 GN=Pfdn2 PE=1 SV=2	Pfdn2	16.5	6.58	5629	71	278	12	0	8004.9	5515.6	7112	8681.4	8429	7576.6	5946.7	7317.1	8659.4	7878.2	5277	5116	6926.8	8099.1	4525.7	7329.9	6334	7267.3	9121.4	8351.7	4066.8	4664.1	1737.6	7019.9	5028.9	7249.1	6124.9	8166.9	8335.5	8233		1.11614	1.02997	0.956775	0.962596	1.04504	1.0221
436	436	46	P70670	Nascent polypeptide-associated complex subunit alpha, muscle-specific form OS=Mus musculus OX=10090 GN=Naca PE=1 SV=2	Naca	220.4	9.35	8101	5	546	8	0	13221.7	8795.9	6685.6	8667.2	7986	7207	6159.8	7908.3	9148.8	7594.3	3810.8	6111.9	7945.6	7937.1	4849.2	8701.8	8924	4712.8	8906.6	6801.1	3305.8	5254.9	1911	7263.4	5057.1	12955.9	7292.4	9727.7	10551.7	8526.5		1.23006	1.18387	1.79768	1.15334	1.12275	1.29754
437	437	517	Q8K3W3	Protein CASC3 OS=Mus musculus OX=10090 GN=Casc3 PE=1 SV=3	Casc3	75.7	6.44	2843	35	184	22	0	4032.3	3110.2	2576.5	3092	2384.6	2892.6	2825.7	1994.2	2410.8	1873.1	2324.2	2449.3	1801.7	2120.8	952.9	3617.1	3972	2511.2	2988	2774.5	1437.6	2233.1	387.4	1983.9	978	3129.9	3021.4	2420.3	2547.8	1922.7		1.21367	1.06926	1.08204	1.05683	1.02648	1.08965
438	438	587	Q9DBG5	Perilipin-3 OS=Mus musculus OX=10090 GN=Plin3 PE=1 SV=1	Plin3	47.2	5.62	3052	49	165	16	0	1644.4	1387.7	1170.9	1624.7	1936.4	1947.9	1831.3	1397.7	2140.1	1727.7	2695	2473.7	1398.5	2700.3	3112.6	1486.8	1430.8	1306.3	1878	1869	3010.5	1773	1345.5	2248	3374.8	2026.3	1745.9	1280.4	1604.4	1494.9		0.916076	0.953366	1.04025	0.749685	0.865254	0.904926
439	439	3719	P70168	Importin subunit beta-1 OS=Mus musculus OX=10090 GN=Kpnb1 PE=1 SV=2	Kpnb1	97.1	4.78	1408	29	120	19	0	289.9	107.8	813.7	188.9	169.5	480.5	144.1	970.6	220.5	191.4	776	248.4	1106.9	200.1	388.2	409.5	76.7	906.3	166.3	152.2	648.5	327.7	2518.6	296.6	363.4	428.5	121.5	682.7	172.5	188.9	Acetyl [N-Term]	0.703379	0.843164	0.891779	0.782313	0.986938	0.841515
440	440	1766	Q6NV83	U2 snRNP-associated SURP motif-containing protein OS=Mus musculus OX=10090 GN=U2surp PE=1 SV=3	U2surp	118.2	8.47	1358	24	133	21	0	884.1	298.4	568.2	683.2	807.5	894	607.5	763.9	808.9	1481.5	841.8	420.9	604.1	845.2	664.6	943.1	346.7	816.4	736.1	1375.1	617.4	618.2	456.1	729.6	840.1	1020	364.7	667.3	773.4	1100.9		0.873544	0.600329	1.14094	0.956113	0.743098	0.862805
441	441	1076	Q63918	Caveolae-associated protein 2 OS=Mus musculus OX=10090 GN=Cavin2 PE=1 SV=3	Cavin2	46.7	5.21	3929	48	208	17	0	1202.4	2630.7	1921.2	1274.9	1356.7	1670.9	2879.6	2795.6	2335.8	1902.5	1720.8	2695.7	2724.1	2306.9	2593.4	1626.2	2902.8	2189.8	1247.2	1307.2	2590.6	2634.2	2967.4	2183.4	2548.2	1419.1	3006.5	2723.8	2290.7	1720.8	Acetyl [N-Term]	0.974317	1.04407	0.849303	0.980692	0.904494	0.950575
442	442	1027	O88271	Craniofacial development protein 1 OS=Mus musculus OX=10090 GN=Cfdp1 PE=1 SV=1	Cfdp1	32.9	4.86	4847	44	260	15	0	8821.9	9193.3	9856.1	18563.4	5731.1	6703.9	8259.8	7133.9	14217	4169.3	5165.2	7073.5	6643.7	12042.9	2162.2	8107.5	10902.4	9276.2	18337.9	6205.9	3066.6	6441.2	1160.1	10719.5	2025.3	7565.6	9444.2	9371.1	16046.3	4756.9		1.3136	1.14339	1.12854	1.12867	1.14093	1.17103
443	443	437	Q8C129	Leucyl-cystinyl aminopeptidase OS=Mus musculus OX=10090 GN=Lnpep PE=1 SV=1	Lnpep	117.2	5.96	2779	20	137	16	0	580.5	479.2	932.3	222.1	528.3	809.3	552.4	1159.6	246.2	551.3	983.7	755.2	1166.1	258.9	591.7	572.3	376.2	1247.6	198.5	416.5	1053.1	762.4	1230.1	258.5	655.3	688.5	448.3	1028.7	208.5	537.2		0.887116	0.81155	0.850735	0.846872	0.974424	0.87414
444	444	2422	Q69ZC8	GPALPP motifs-containing protein 1 OS=Mus musculus OX=10090 GN=Gpalpp1 PE=1 SV=2	Gpalpp1	38.9	5.41	2386	34	180	17	0	5029.4	3746.3	3477.5	4593.9	3621.8	4015.8	3425	2578	3674.4	2762.2	3534.8	2929.4	2484.2	3782.4	1547.5	5220.9	4572.1	3458.5	4447.5	3513.2	2259.5	2881.2	1127.4	3277.9	1458.7	4311.5	3677.7	3368.5	3912.2	2904.7		1.30663	1.07378	1.07363	1.06472	1.05159	1.11407
445	445	654	Q9CQH7	Transcription factor BTF3 homolog 4 OS=Mus musculus OX=10090 GN=Btf3l4 PE=1 SV=1	Btf3l4	17.3	6.35	3663	51	259	11	0	3076.5	3190	4361.6	2030.8	2612.2	2408.2	2739.1	2497.2	1624.8	1772.1	1825.9	1577.1	2265.1	1833.9	1137.7	3490.7	4654.5	3912.5	1858.7	2246.9	1614.2	2314	704.4	1479.7	1091.3	3064.4	2763.1	4131	1648.3	1872.4		1.65425	1.00876	1.27249	1.01446	1.0566	1.20131
446	446	2835	O70279	Splicing factor ESS-2 homolog OS=Mus musculus OX=10090 GN=Ess2 PE=1 SV=2	Ess2	52.6	6.7	3317	63	160	21	0	1279.7	2428	1047.1	1541.5	1168.2	1055	2146.1	946.4	1113.8	842.8	874.7	2055.1	897.5	1270.1	463.3	1196.3	2475.4	1013.9	1327	1076.8	694.1	1874	241.4	928.7	460.8	1067.6	2238.6	987.4	1144.2	886.2	Acetyl [N-Term]	1.04332	1.0431	1.01194	1.02729	1.0515	1.03543
447	447	4185	P08752	Guanine nucleotide-binding protein G(i) subunit alpha-2 OS=Mus musculus OX=10090 GN=Gnai2 PE=1 SV=5	Gnai2	40.5	5.45	4660	51	179	13	4	1273.6	768.8	1709.9	187.3	622.7	1953.4	946.6	2328.7	212.2	742.7	2131	1124.7	2003.7	144.3	1105.2	1781.4	431.2	2559.3	79.8	564.5	3476.7	1326	5997.6	289.4	1159.5	1705.8	639.4	2014.1	181.4	736.6		0.864903	0.67547	0.873247	0.854854	0.991787	0.852052
448	448	1113	P48024	Eukaryotic translation initiation factor 1 OS=Mus musculus OX=10090 GN=Eif1 PE=1 SV=2	Eif1	12.7	7.44	5507	86	227	12	7	5929.7	3993.9	5798.2	4544.8	6299.9	5292.8	3445.8	3865.7	4169.1	4989.7	4269.2	2356.8	3742.2	3873.5	3593.3	6986.8	3797.7	5355.9	4482.6	5184	3568.6	3080.3	1544.6	4052.1	3101.3	6414.6	3641.5	6050.7	4576.2	5594.1	Acetyl [N-Term]	1.56523	1.05679	1.21195	1.09765	1.12113	1.21055
449	449	2392	C0HKD9	Microfibrillar-associated protein 1B OS=Mus musculus OX=10090 GN=Mfap1b PE=1 SV=1	Mfap1b	51.9	4.98	6244	37	284	18	1	9722.3	8969.3	9768.4	3308.4	1953.4	7879.2	8008.1	8076.9	3859.7	1765.3	6573.3	7346.1	7717.2	2085.6	1475.5	9200.7	9563.3	9085.2	2725.5	2461.7	2944.2	6925.1	1943	3202.3	1244.2	8007.6	9142.6	9598.7	4360.5	2050.8	Acetyl [N-Term]	1.18841	1.14167	1.0163	1.12975	1.16173	1.12757
450	450	438	P07758	Alpha-1-antitrypsin 1-1 OS=Mus musculus OX=10090 GN=Serpina1a PE=1 SV=4	Serpina1a	46	5.72	8468	30	358	11	0	2504.6	2055.5	1677.5	778.8	1443.2	4242.5	2118.1	2475.6	1216.1	2107.7	6488.2	3067.3	4146.8	2417.2	5742.8	2501.5	1290.4	1237	466.6	1170.5	8757.3	4442.9	2706.8	3026.9	4777.6	2437.5	1426.1	1449	930.5	2370.3		0.585313	0.673292	0.574543	0.765151	1.12459	0.744578
451	451	3033	Q65Z40	Wings apart-like protein homolog OS=Mus musculus OX=10090 GN=Wapl PE=1 SV=2	Wapl	134	5.41	2558	20	133	19	0	1468.7	480.5	119.5	496.9	1576.4	1475.6	672.5	105.8	436	1097	1087.3	608.3	105.6	437.4	672	1620.1	594.5	131.9	542.5	1460.6	930.7	622.3	36.9	296.6	513.8	1873.6	665	132.1	402.1	1030.9		1.24858	0.988848	1.26972	0.922248	0.939745	1.07383
452	452	181	Q9DCL8	Protein phosphatase inhibitor 2 OS=Mus musculus OX=10090 GN=Ppp1r2 PE=1 SV=3	Ppp1r2	23.1	4.83	3810	75	195	12	0	6975.8	7421.6	5735.3	10312.2	6861.8	5766	8596.6	4584.6	9561.8	5938.1	4789.5	7145.7	4095.9	9664.6	3043.1	6056.7	9187.1	5762.1	10875.5	7363.2	4764.8	6963	1196.2	8325.4	3535.1	6502.1	8731	5631.2	9870.9	6198.3	Acetyl [N-Term]	1.22829	1.01563	1.12766	1.03233	1.04382	1.08955
453	453	4207	P80318	T-complex protein 1 subunit gamma OS=Mus musculus OX=10090 GN=Cct3 PE=1 SV=1	Cct3	60.6	6.7	2340	44	139	21	0	580.1	316.2	1326	31.2	357.8	748.2	288.1	1603.4	27.2	434.3	1228.1	406.4	1749	23.4	1096.9	853	160.6	1575.4	17.3	353.7	1016.9	627.6	4119.4	44.6	940.5	718.4	202	1111.2	32.8	398.8		0.693027	0.701145	0.960171	1.20588	0.918259	0.895697
454	454	1757	P19096	Fatty acid synthase OS=Mus musculus OX=10090 GN=Fasn PE=1 SV=2	Fasn	272.3	6.58	919	13	66	25	0	88.5		143.6		108	99.2		194.6		101.4	168.6		241.6		196.9	97.3		192.6		67.1	142.6		892.4		169.6	125.7		89.7		102.8		0.460946	NA	1.26714	NA	1.01381	0.913963
455	455	4001	Q60972	Histone-binding protein RBBP4 OS=Mus musculus OX=10090 GN=Rbbp4 PE=1 SV=5	Rbbp4	47.6	4.89	5981	38	257	13	5	1738.4	2324.6	2380.3	916.2	1381	3437.5	2382.6	4693.4	1134.4	2063.9	6721.5	4729.7	8368.8	1384.7	7678	2150.2	1447.8	2679.3	773.9	1421.9	5514.1	4280.6	4672.7	2438.1	6536.8	1758.4	1977.7	2200.5	954.6	2102.9	Acetyl [N-Term]	0.46885	0.83006	0.511535	0.841502	1.0189	0.734168
456	456	3443	Q6A026	Sister chromatid cohesion protein PDS5 homolog A OS=Mus musculus OX=10090 GN=Pds5a PE=1 SV=3	Pds5a	150.2	7.85	2230	13	127	15	0	2297.2	478.2	1314	1683.2	3278.3	2330.3	580.8	1270.2	1422.7	3506.5	1914.1	565.3	1441.8	2032.1	2165.3	1498.9	550.4	1610.9	1850.5	2888.3	2109.1	594	1258.4	1377.3	2181.6	2140.3	543.2	1321.6	1195.1	2884.3		1.04047	0.935262	0.918465	0.840022	0.822558	0.911355
457	457	844	Q6NZB0	DnaJ homolog subfamily C member 8 OS=Mus musculus OX=10090 GN=Dnajc8 PE=1 SV=2	Dnajc8	29.8	9.06	7956	63	447	18	0	11341.3	11321.9	7877.4	11569.8	12425.4	14702.4	13292.3	13066.9	14973.1	14802.9	11520.1	14890	13721.2	15205.7	11924.8	11244	8808.5	8357.2	10248.9	10758.4	13291.7	12783.1	4307.1	13674.9	13132.4	11498.8	14048.8	10488.9	14463	15918.3	Acetyl [N-Term]	0.802708	1.05691	0.782104	0.965932	1.07535	0.936601
458	458	644	Q91WN1	DnaJ homolog subfamily C member 9 OS=Mus musculus OX=10090 GN=Dnajc9 PE=1 SV=2	Dnajc9	30	5.94	3011	57	183	17	0	1785.7	1168.2	1761.2	959.8	1022.9	2322.8	1191.6	2378	1436.1	1712.5	2954.2	1881.5	3159.6	1848.3	4013.1	1596.9	744.3	1788.1	905.9	909.8	3008.5	1673.6	2722.9	1874	3816.4	2065.7	1071.9	1717.9	1425	1826.8		0.722414	0.899547	0.889315	0.992271	1.06674	0.914058
459	459	3973	Q9JMH9	Unconventional myosin-XVIIIa OS=Mus musculus OX=10090 GN=Myo18a PE=1 SV=2	Myo18a	232.6	6.28	1314	15	111	22	0	150.8	209.5	330.4	68.2	211.5	231	320.3	420.4	105.7	265.2	215.7	362.4	443.6	67.2	293.2	156.8	249.7	353	78.6	220.8	281.2	327.5	415.9	109.6	313.4	196.8	341	423.6	99.8	228		1.00761	1.06463	0.851948	0.944182	0.859729	0.945619
460	460	2437	O89053	Coronin-1A OS=Mus musculus OX=10090 GN=Coro1a PE=1 SV=5	Coro1a	51	6.48	5810	44	296	19	0	2520.1	2043.7	4102.1	876.4	1147	3263	2163.6	5319.3	1050.8	1998.3	6976.6	4198.9	6120.4	1062.4	11794.2	3106.9	1364.6	4758	812.2	1246.5	11711.9	4627.5	55105.9	1540.3	12408.3	3273.1	1664.6	3437.8	631.9	1640.1		0.646288	0.769366	1.0031	0.601351	0.820748	0.76817
461	461	1813	P10107	Annexin A1 OS=Mus musculus OX=10090 GN=Anxa1 PE=1 SV=2	Anxa1	38.7	7.37	1941	56	126	17	0	199.5	81.8	549.9	73.8	134.9	238.7	115.3	736.9	163.4	198.2	347.1	164.5	787.6	208	391.3	207.5	58.4	706	73.9	132.1	722.2	201.8	3422.6	427.1	417	244.3	70.6	593.1	96.6	158.3	Acetyl [N-Term]	0.804858	0.612316	1.02346	0.591187	0.798688	0.766102
462	462	4151	P59328	WD repeat and HMG-box DNA-binding protein 1 OS=Mus musculus OX=10090 GN=Wdhd1 PE=1 SV=2	Wdhd1	124.2	5.63	2465	15	140	18	0	1619.5	1697.9	137.7	4157.2	3471.3	1570.5	1720.8	118	2507.2	2755.5	1162.5	1928.5	119.9	3228.2	1363.8	1363.6	1868.7	140.4	4036.2	3528.1	633.3	1732.6	46.1	2030.4	1272.2	1853.8	2092.1	133.7	2841.5	3043.6		1.13305	1.21577	1.18039	1.13334	1.10455	1.15342
463	463	4581	Q9D1A2	Cytosolic non-specific dipeptidase OS=Mus musculus OX=10090 GN=Cndp2 PE=1 SV=1	Cndp2	52.7	5.66	2202	49	128	18	0	229.2	82.2	503.1		179.6	368.7	120.5	705		272.9	560.2	138.3	746.5		988.6	323.4	59.6	619.7		200.8	881.8	209.3	4914.9		968.9	336.2	76.9	487.7		201.1		0.691773	0.638174	0.911852	NA	0.7369	0.744675
464	464	3386	P01899	H-2 class I histocompatibility antigen, D-B alpha chain OS=Mus musculus OX=10090 GN=H2-D1 PE=1 SV=2	H2-D1	40.8	6.73	4422	48	238	17	2	4317.3	2882.9	4511.8	2222.7	2643.6	6787.4	4096.4	7598	3956.3	3390.2	6889.3	4467.2	6993.9	3170.8	6269.2	4656.4	1855.1	5798.6	1821.9	2413.9	9327.1	4743.4	13247.5	4446.3	5838.7	5558.3	3117	6455.1	3415.8	3303.5		0.849579	0.760912	0.818914	0.863382	0.974426	0.853443
465	465	785	Q61048	WW domain-binding protein 4 OS=Mus musculus OX=10090 GN=Wbp4 PE=1 SV=4	Wbp4	42.1	7.36	2812	47	161	16	0	2077	2785.3	1258.5	2257.2	2263	1907.8	2381	1048.3	2307.2	2147.5	1625.6	1912.4	970.2	2435.1	1137.3	1983.3	2729.2	1241.6	2335.2	2072.2	1159.6	1893	266.5	1935.5	1209.5	2105.6	2642.4	1291.2	2303.4	2293		1.23171	1.10979	1.10368	0.998353	1.06775	1.10226
466	466	2568	Q3UY34	Uncharacterized protein C12orf43 homolog OS=Mus musculus OX=10090 PE=2 SV=1	Q3UY34	27.6	8.7	2314	48	122	11	0	2053.4	1038.9	2195.3	2143.4	1760	1809.1	964.5	1863.7	2388.4	1655.5	1211.3	701.5	1744.2	2008.5	604.6	1722.8	1200.3	2067.6	2245.5	1746.9	641.8	723.8	271.9	1487.8	688.8	1969.7	1003.6	2413.5	2354.5	1794.6		1.295	1.04054	1.08877	0.985806	1.08402	1.09883
467	467	3708	P13020	Gelsolin OS=Mus musculus OX=10090 GN=Gsn PE=1 SV=3	Gsn	85.9	6.18	3528	29	158	18	0	414.8	402.8	1065.9	25.4	751.1	479.2	528.2	1460.7	23.2	1080.4	761.6	795.2	1592.2	39.9	2597.6	391.4	393.3	1214.2	23.2	890.4	1497	898.4	10212.7	59.9	2781.7	490.8	427.5	1048.6	20.8	958.9		0.717875	0.809353	1.02421	0.896552	0.887542	0.867106
468	468	2901	Q9CW03	Structural maintenance of chromosomes protein 3 OS=Mus musculus OX=10090 GN=Smc3 PE=1 SV=2	Smc3	141.5	7.18	745	24	52	25	0	29.3		198.7		76.8	29.9		257.9		121	34.2		326.8		181.5	22.8		214.8		88.9	22.4		840.8		196	24.3		207.7		90.6		0.805351	NA	0.812709	NA	0.74876	0.78894
469	469	3770	Q61103	Zinc finger protein ubi-d4 OS=Mus musculus OX=10090 GN=Dpf2 PE=1 SV=1	Dpf2	44.2	6.47	2224	54	119	17	1	701.3	1353.7	533.5	112.3	555.2	701.9	1203	736.5	238.4	747	796.1	973.6	748.7	269.7	729.3	688.6	1387.9	583.5	123.8	576.9	761.5	1017.9	463.4	271.6	749.1	888.1	1218.4	669.7	242.2	720.4	Acetyl [N-Term]	0.909301	1.0128	1.26528	1.01594	0.964391	1.03354
470	470	637	O08553	Dihydropyrimidinase-related protein 2 OS=Mus musculus OX=10090 GN=Dpysl2 PE=1 SV=2	Dpysl2	62.2	6.38	1301	51	70	19	1	101.4		513	170.4	238.4	145.8		649.1	143.9	287.1	281.1		796.9	226.3	575.4	132.4		558.1	211.3	124.7	390.2		4558.4	229.1	607	134.6		470.1	135	235.5		0.724234	NA	0.923182	0.938151	0.820272	0.85146
471	471	1380	Q9JJT9	Phosphorylated adapter RNA export protein OS=Mus musculus OX=10090 GN=Phax PE=1 SV=1	Phax	43.2	5.34	4979	40	213	15	0	3646.1	2539.1	3690.5	951.9	2925.7	4026.8	2819.8	3069.6	1111.4	2761.2	2512.6	1511.2	2276.7	815.1	1294.2	3805.6	2495.9	3345.6	1036.1	2260	1798.7	1651.7	548.1	706.5	1195	4051.6	2606.4	4416.9	1216.2	2925.1		1.43892	0.924321	1.00616	1.0943	1.05936	1.10461
472	472	1879	P30999	Catenin delta-1 OS=Mus musculus OX=10090 GN=Ctnnd1 PE=1 SV=2	Ctnnd1	104.9	6.87	3274	27	162	19	0	1229.3	1878.4	1069	686.7	1685.4	1406.3	2150.2	1055.7	657.8	1652.2	1003.1	2027.4	891.7	673.4	1086.7	1306.8	1897.6	1175	761.3	1579.2	1323.6	1910.4	914.5	613.1	1349	1379.5	2179.4	988.2	592.7	1457.4	Acetyl [N-Term]	0.936061	1.01358	0.980943	0.901034	0.882097	0.942743
473	473	636	P68510	14-3-3 protein eta OS=Mus musculus OX=10090 GN=Ywhah PE=1 SV=2	Ywhah	28.2	4.89	5363	68	250	16	2	398.3	332	943.4	26.9	914.2	809.8	347	1323.8	25.1	1111.5	1422.1	599.1	1657.4	28.7	3482.1	585.1	134.2	1090.8	22	929.4	1866.4	909.6	5188.4	43.1	3198.9	601.4	270.8	864.4	13.9	992.3		0.652969	0.780403	0.742653	0.553785	0.892758	0.724513
474	474	4621	Q62093	Serine/arginine-rich splicing factor 2 OS=Mus musculus OX=10090 GN=Srsf2 PE=1 SV=4	Srsf2	25.5	11.85	19005	30	810	7	0	7779.7	11086.8	7427.9	10077.4	8151.1	5993.6	9846.9	7192.6	8276.8	6851.6	4560.9	9528.5	6936.1	7620.7	4556.2	6633	12087.5	7366.7	9467.7	8579.7	2212.7	8238.7	1138.8	7979.5	4797.2	5494.4	10076.6	7363.5	8678.8	7706.5	Acetyl [N-Term]	1.02376	1.02333	0.916711	1.04857	1.12477	1.02743
475	475	410	P48036	Annexin A5 OS=Mus musculus OX=10090 GN=Anxa5 PE=1 SV=1	Anxa5	35.7	4.96	5023	70	239	19	0	1097.4	696.7	1187.5	121.2	666.6	1792.1	885.4	2157.7	160.7	1247.6	3063.8	1444.7	2230.6	155.9	6535.8	1440.5	496.4	1673.3	94.7	718.1	7464.1	1845.9	20658.9	281	6539	1573.1	721	1223.9	111.9	1010.8		0.567224	0.814321	0.877797	0.696329	0.810196	0.753173
476	476	2154	Q8K4G5	Actin-binding LIM protein 1 OS=Mus musculus OX=10090 GN=Ablim1 PE=1 SV=1	Ablim1	96.7	8.63	2653	27	191	20	1	3713.4	4384.8	2689.1	4153.9	4177.9	3335.3	4238.6	2278.1	3178.1	2663.9	2760.2	4357.5	2097.8	3469.3	1833.1	3497.2	4723.4	2646.6	3851.6	3513.7	3643.7	3623.8	1303	2828.6	1654.9	3925.2	5235.7	2988.7	3443.4	3101.6		1.31193	1.23524	1.17687	1.08348	1.16431	1.19436
477	477	1547	Q9R0P4	Small acidic protein OS=Mus musculus OX=10090 GN=Smap PE=1 SV=1	Smap	20	4.82	6214	35	329	8	0	5867.1	5392.7	8458.7	8858.6	8967.2	5146.7	5337.2	6826.5	6476.1	6353.1	3966.5	4231.6	6135.6	5214.3	3447.1	6664.8	6446.5	8178	8195.7	10430.8	3226.3	4079.5	1601	6373.4	3540.9	4570.3	5270.4	8113.8	6522.4	6847.1		1.18857	0.987484	0.888006	1.00715	1.07776	1.02979
478	478	1445	P22599	Alpha-1-antitrypsin 1-2 OS=Mus musculus OX=10090 GN=Serpina1b PE=1 SV=2	Serpina1b	45.9	5.54	7692	27	322	10	0	237.3	143.5	130.6	117.1	256.2	404.3	135.5	184.5	106.5	366.3	606.1	197.9	293.2	178.5	1256.8	264.8	105.6	102.1	62	250	974.1	215.1	340.6	232.9	1062.9	245	128.8	94.1	76.7	412.8		0.510027	0.950554	0.605986	0.720188	1.12695	0.78274
479	479	1514	P97822	Acidic leucine-rich nuclear phosphoprotein 32 family member E OS=Mus musculus OX=10090 GN=Anp32e PE=1 SV=2	Anp32e	29.6	3.88	3357	42	154	8	0	328.7	925.4	1951.7	115.6	55.3	446	325.3	2868.1	127.1	76	1067.8	1241.6	3873.9	129.8	260.9	420	368.1	1578.3	83.8	99.7	261.5	1081.7	2572.3	198.5	239.4	255.7	367	1285.6	145.4	83.7		0.448241	1.12819	0.573318	1.14398	1.10132	0.879009
480	480	2497	P61982	14-3-3 protein gamma OS=Mus musculus OX=10090 GN=Ywhag PE=1 SV=2	Ywhag	28.3	4.89	4920	65	249	15	3	576.7	752.6	1090.2	162.5	320	1215.8	899.2	1704.4	209.3	758.7	2273.2	1910.1	2303.3	171.2	3024.6	840.9	333	1429.2	141.1	418	3713.2	2387.1	9481.3	268.5	3146.7	852.2	490.8	1033.4	143	630.1	Acetyl [N-Term]	0.606313	0.545819	0.700938	0.68323	0.8305	0.67336
481	481	3990	Q9CWK3	CD2 antigen cytoplasmic tail-binding protein 2 OS=Mus musculus OX=10090 GN=Cd2bp2 PE=1 SV=1	Cd2bp2	37.7	4.6	5193	56	197	12	0	2049.3	2574.8	1379.3	2354	1836.1	2035.6	2779.2	1484.8	2539.2	1797.4	1861.5	2509.8	1343.3	2316.6	1224.9	1980.6	2213.8	1488	2273.7	1823.6	1227.1	2202.9	607.3	2450.6	1139.5	1754.2	2749	1278.6	2520.3	1920.2		0.861126	0.989134	0.861761	0.992557	1.06832	0.95458
482	482	4591	Q8BYW1	Rho GTPase-activating protein 25 OS=Mus musculus OX=10090 GN=Arhgap25 PE=1 SV=2	Arhgap25	73.3	6.38	2504	34	161	22	1	760.8	738.8	1009.9	1032	1216.1	863	995.3	998.1	1051.6	1382.8	738	1014.5	898	1527.6	1557.3	856.8	902.1	1245.6	1377.7	803.4	1427.1	945	909.8	1135.7	1480.5	940.4	948.8	1035	861.5	1179.8		1.03697	0.95328	1.08969	0.819228	0.853196	0.950472
483	483	1629	Q9DAU1	Protein canopy homolog 3 OS=Mus musculus OX=10090 GN=Cnpy3 PE=1 SV=1	Cnpy3	30.5	5.62	4026	46	219	14	0	5165	3552.7	3016.7	2807.5	2589.4	7435.6	3670.5	5977.8	7202	5911.2	6598.7	5798.6	5790.8	8138.4	5439.6	4383.5	2698.4	3271.4	2363.1	1573.4	7068	4887.4	1837.6	9024.4	6733.2	5698.3	3739.8	4453.6	6547.2	5893.9		0.745023	1.01888	0.766354	0.909081	0.997073	0.887282
484	484	2538	P62073	Mitochondrial import inner membrane translocase subunit Tim10 OS=Mus musculus OX=10090 GN=Timm10 PE=1 SV=1	Timm10	10.3	6.29	2812	87	182	12	0	2977.6	3760.1	2414.3	3418.2	2027.1	3240.8	3586	2991.5	3734.5	2120.8	3090.3	3004.5	2832.3	2810.8	1138.4	3792.2	3980.1	2621	2831	2274.1	2217.6	2928.5	658	4028.6	1416.6	2159.1	3492.4	2265.3	3098.9	2049.4		0.757246	0.973898	0.666224	0.829803	0.966333	0.838701
485	485	2247	P43276	Histone H1.5 OS=Mus musculus OX=10090 GN=Hist1h1b PE=1 SV=2	Hist1h1b	22.6	10.92	10997	40	509	14	0	9170.5	14650	18378.1	9723	9475.2	10914.7	13203.5	20664.1	12612.8	12362.2	10733.1	13377.8	20782.3	15473	12214.4	11587.5	12166.1	18083.9	10654.3	8862.4	12170.8	16236.6	17096	13728	12108	11021.3	13383.1	17289.7	14262.4	13878.9	Acetyl [N-Term]	0.836702	1.0136	1.00977	1.13079	1.12269	1.02271
486	486	4672	Q922D8	C-1-tetrahydrofolate synthase, cytoplasmic OS=Mus musculus OX=10090 GN=Mthfd1 PE=1 SV=4	Mthfd1	101.1	7.14	1380	24	96	21	0	244.3	124.6	751.7	37	153.2	325.8	109.2	782.3	22.4	182.8	468.3	159.3	837.2	21	456.4	327.9	33.5	838	27.9	165.8	329.1	207.3	2020.1	25.3	443.2	349	79.8	520.6	19.4	172.8		0.665474	0.730769	1.07121	0.866071	0.945295	0.855764
487	487	53	B2RXS4	Plexin-B2 OS=Mus musculus OX=10090 GN=Plxnb2 PE=1 SV=1	Plxnb2	206.1	5.87	1442	17	91	21	0	256.3	157.3	505.5	224.1	337.3	270.8	196.4	502	281.4	372.7	285.1	281.2	413.1	257.9	267.3	218.1	128.3	523.1	300.8	355.8	290.4	266.9	235.8	224.8	299.4	256.3	141	545.7	224.4	307.9		1.08705	0.717923	0.946455	0.797441	0.826134	0.875001
488	488	3907	P48193	Protein 4.1 OS=Mus musculus OX=10090 GN=Epb41 PE=1 SV=2	Epb41	95.9	5.6	4525	26	231	18	1	2955.5	2940.8	3784.5	3077.5	4834.2	2935.5	3125.8	4033.3	2267.4	4237	2516.8	3998.9	3620.4	2876.9	3363.9	2667	3804.9	3978.1	2391.3	4500	2967.7	3353.4	2341.6	1988.9	3403	4045.3	3953.3	4969.2	2479.3	4566		1.23204	1.26473	1.37806	1.09346	1.07765	1.20919
489	489	642	Q8K1B8	Fermitin family homolog 3 OS=Mus musculus OX=10090 GN=Fermt3 PE=1 SV=1	Fermt3	75.6	7.05	1383	40	90	20	0	70.9	109.4	780.2	42.1	89.9	167.8	104.6	888.5	46.2	138.5	377.8	217.4	1048.7	33.6	467.8	116.3	63.7	808.1	18.3	85.1	560.1	210.7	8176.4	40	395.8	164.2	92	692.5	22.1	98.1		0.779403	0.879541	0.978546	0.478355	0.708303	0.76483
490	490	208	Q9CXI5	Mesencephalic astrocyte-derived neurotrophic factor OS=Mus musculus OX=10090 GN=Manf PE=1 SV=1	Manf	20.4	8.07	5003	46	415	12	0	12790.4	6805	9890.5	10561.6	11938.9	12398.3	7146.3	11807.7	15097.8	12647.7	10153.4	7187.4	11111.3	15918.3	8520.8	9553	6718	10503.6	13609.2	10330.6	10805.1	7093.3	3249.7	17648.6	10274.3	13801.4	7008.8	11358.4	15288.5	12469.3		0.961949	0.980759	1.11317	1.01263	0.985895	1.01088
491	491	1856	P97855	Ras GTPase-activating protein-binding protein 1 OS=Mus musculus OX=10090 GN=G3bp1 PE=1 SV=1	G3bp1	51.8	5.59	5855	39	225	13	0	1295.7	975.9	1272.2	1056.8	1061.7	1232.7	1294	1432.3	1477.4	1767.8	1330.1	1218.7	1312.1	998.2	852.8	1495.3	945.6	1701	1163.4	1498.7	731.5	1318.5	880.5	1240	983.2	1500.5	1164.4	1220.7	1177.5	1335.1		0.852266	0.899845	1.21725	0.797008	0.755232	0.90432
492	492	1029	Q9D198	Pre-mRNA-splicing factor SYF2 OS=Mus musculus OX=10090 GN=Syf2 PE=2 SV=1	Syf2	28.7	8.66	4524	62	225	15	0	4063	2029.3	2351.2	3404.5	3312.7	3487.4	1950.9	1922.1	2889.5	2773.7	2972.4	1784.6	1869.7	2935.7	1934.3	3831.6	2117.9	2307.6	3120.5	3293.6	1966.9	1669.5	772.5	2386.9	2079.2	3756.4	2097.8	2372.4	3127.6	2977.7	Acetyl [N-Term]	1.23428	1.0753	1.07713	1.0824	1.07355	1.10853
493	493	1360	P28656	Nucleosome assembly protein 1-like 1 OS=Mus musculus OX=10090 GN=Nap1l1 PE=1 SV=2	Nap1l1	45.3	4.46	2706	40	153	13	1	1146.4	821.7	1097	535.4	406.2	2158.6	689.7	2657.1	894.4	778.6	3531.5	1528.6	5239	737.3	2110.2	1404.3	443	1204.7	425.4	472.2	1391.1	1394.8	3375	1181.6	1560.5	1400.7	662.9	1113.9	699.9	742.8	Acetyl [N-Term]	0.419216	0.961143	0.648893	0.782536	0.95402	0.753162
494	494	4059	Q9WVK4	EH domain-containing protein 1 OS=Mus musculus OX=10090 GN=Ehd1 PE=1 SV=1	Ehd1	60.6	6.83	971	42	92	20	5	67.5		385	64.6		61.5		376	50.2		103.8		361.7	72.9		68.9		455.2	82.8		127.6		2256.1	69.6		78.7		322.4	45.2			0.857447	NA	1.27967	0.900398	NA	1.01251
495	495	2858	P24527	Leukotriene A-4 hydrolase OS=Mus musculus OX=10090 GN=Lta4h PE=1 SV=4	Lta4h	69	6.42	1150	38	90	19	0	201.7	59.6	870.7		131	391.8	51.6	1213.3		203.4	784.4	70.1	1875.7		1155.1	317.8	35.4	1104.7		173.7	1509.3	81.8	12518.7		1125.4	288.3	43.5	767		201.7		0.63216	0.843023	0.735835	NA	0.991642	0.800665
496	496	4238	P68040	Receptor of activated protein C kinase 1 OS=Mus musculus OX=10090 GN=Rack1 PE=1 SV=3	Rack1	35.1	7.69	3011	60	164	14	0	507.2	458.3	1312.6	233.5	422	1026.9	428.5	1280.8	305.7	639.2	1553.7	447.4	1400.8	231	1422.2	1051.8	233.6	1450.2	136.4	465	1139.6	957.4	5341.1	375.2	1344.2	796	258.3	791.5	150.4	541.4		0.617973	0.6028	0.775149	0.491986	0.846996	0.666981
497	497	3760	Q8VDM4	26S proteasome non-ATPase regulatory subunit 2 OS=Mus musculus OX=10090 GN=Psmd2 PE=1 SV=1	Psmd2	100.1	5.17	1483	25	85	18	0	199.1	220.6	233.9	33	322	319.5	259.1	283.7	32	346.6	550.6	567.4	395.3	36	779	273.5	125.2	259.9	19.8	378.1	585.5	610	1124.9	76.8	674.5	298.6	213.2	209	36	352.3		0.736694	0.822848	0.934585	1.125	1.01645	0.927115
498	498	2730	P62806	Histone H4 OS=Mus musculus OX=10090 GN=Hist1h4a PE=1 SV=2	Hist1h4a	11.4	11.36	32623	60	1781	10	0	60239	155437	146272	20901.7	12690.3	51404.1	78350.5	57872.3	33416.9	8048	47262.3	32281	35916.9	10809.6	24632	117875	140512	116855	12731	19662.1	10562	60039	25046.7	36834.6	16003.6	25296.9	81180.7	134463	46680.1	9884.3		2.32344	1.03612	0.492118	1.3969	1.22817	1.29535
499	499	3762	Q61656	Probable ATP-dependent RNA helicase DDX5 OS=Mus musculus OX=10090 GN=Ddx5 PE=1 SV=2	Ddx5	69.2	8.92	3262	40	181	22	4	1568.8	1175.9	2560.9	562	494.2	1954.9	1268	3041.6	929.6	861.8	2437.5	1451	3026.9	566.4	1083.1	1784.9	804.2	2755.6	495.3	449.5	1677.8	1755.7	8411	698	1103.6	2077.4	1083.6	2451.3	746.1	734.2		0.805925	0.854574	1.06266	0.802603	0.851938	0.875541
500	500	3488	Q04447	Creatine kinase B-type OS=Mus musculus OX=10090 GN=Ckb PE=1 SV=1	Ckb	42.7	5.67	2616	47	116	14	0	248.7	497.4	529.9	50.2	221.4	402.4	539.3	686	88.4	370.3	528.7	539.7	670.3	78.2	753.4	352.5	361.3	553.5	57.6	164.7	905.4	947.5	2898.4	88.3	768.9	343.7	461.1	521.9	88.4	294.3		0.760787	0.854997	0.854125	1	0.794761	0.852934
501	501	3786	Q8CI51	PDZ and LIM domain protein 5 OS=Mus musculus OX=10090 GN=Pdlim5 PE=1 SV=4	Pdlim5	63.3	8.25	2929	37	148	16	0	2541.1	1221.1	1063.7	2908.2	2341.6	2479.2	1525.1	1131.8	2627.1	2642.3	1889.7	1088	1018.2	2855.7	1908.7	2340.9	1534.5	1191.9	3658	2550.2	3131.2	1108.2	1303.8	2415.6	2182.2	2674.3	1375.3	1139.6	2475.9	2185.2		1.00689	0.901777	1.07869	0.942446	0.827007	0.951363
502	502	3275	Q99L45	Eukaryotic translation initiation factor 2 subunit 2 OS=Mus musculus OX=10090 GN=Eif2s2 PE=1 SV=1	Eif2s2	38.1	5.8	2568	46	157	16	0	697	509.2	1044.4	401.3	436.8	772.7	580.8	1013.3	458.4	574.2	940.9	518.9	960.3	347.8	838.1	979.6	506	1349.9	390.3	518.4	1001.4	729.5	1512.1	387.1	803.8	961.3	597.2	990.3	396.9	508.3		0.977302	1.02824	1.24408	0.865838	0.885232	1.00014
503	503	2023	Q99LX0	Protein/nucleic acid deglycase DJ-1 OS=Mus musculus OX=10090 GN=Park7 PE=1 SV=1	Park7	20	6.77	3252	60	182	11	0	1266.6	1789.5	2260.6	3130	1730.1	1380.2	1729.1	2356.1	3118.8	2123.3	1855.5	1971.5	2993.5	3401	4186.6	1357.6	1482	2610.2	3409.6	1987.1	2086.1	2334.1	7046.8	4111.7	4432.8	1279.9	1417.5	1924.4	2784.1	1961		0.816773	0.819791	0.927329	0.892683	0.923562	0.876028
504	504	1972	Q6NSQ7	Protein LTV1 homolog OS=Mus musculus OX=10090 GN=Ltv1 PE=1 SV=2	Ltv1	54	4.92	2424	38	170	19	0	3136.8	3868.6	3168.4	806.6	431.7	2920.3	3307.2	2891.4	1883	496.3	2296.2	2680.6	2616.7	1087.4	571	3239.8	3194.8	3026.8	783	386.2	713.7	2789.1	388.9	1506.9	494.4	2524.2	3614.1	3032.9	1878.9	594		1.04894	1.0928	0.864363	0.997823	1.19686	1.04016
505	505	135	Q8R344	Coiled-coil domain-containing protein 12 OS=Mus musculus OX=10090 GN=Ccdc12 PE=1 SV=2	Ccdc12	18.9	7.21	5122	76	303	17	0	8810	4180.1	6041.5	9518.7	10062.3	7349	4256.5	4487.7	7681.7	7715.8	5646.7	3893.4	4224.1	7992.9	4009.8	8314.6	5010.7	5491	9525.7	9571.6	4140.7	3378.8	899.3	6198.6	4151.5	7242.6	4350.2	5890.4	7602.5	8225.3	Acetyl [N-Term]	1.31257	1.02201	0.985522	0.98969	1.06603	1.07516
506	506	2292	P62983	Ubiquitin-40S ribosomal protein S27a OS=Mus musculus OX=10090 GN=Rps27a PE=1 SV=2	Rps27a	17.9	9.64	16069	64	1005	11	0	22233.9	45080.4	36461.2	13480.2	29612.3	22444.3	35992.3	18341.5	8854.8	16907.6	15407.9	20607.6	16201.2	9890.3	15785.7	32601.8	62982.4	27543.1	11127.4	20528.9	15673.2	31007.1	10680.1	9197.3	12117.7	23074.5	38649.4	38901.8	9292.6	17576.1		2.12097	1.07382	1.02808	1.04944	1.03954	1.26237
507	507	626	Q9ESU6	Bromodomain-containing protein 4 OS=Mus musculus OX=10090 GN=Brd4 PE=1 SV=2	Brd4	155.8	9.19	2229	16	144	20	3	3444.6	1239.2	1645.9	1148.9	4042.3	3112.6	1486.6	1535.7	1348.8	4344.3	2699.6	1817.7	1509	1200.1	2452.2	2847.7	1389.8	2355.9	1282	4100.7	1940.6	1638	965.9	1164.7	2878.3	3667.4	1448.8	1715.6	1286.5	4068.1		1.11715	0.974573	1.17824	0.953811	0.936422	1.03204
508	508	1934	P23953	Carboxylesterase 1C OS=Mus musculus OX=10090 GN=Ces1c PE=1 SV=4	Ces1c	61	5.06	2323	32	157	16	1	1962	1136.9	868.2	1231	712.1	3680.4	1267.8	1637.5	976.6	1267.1	5684.5	1984.8	2672	1527.8	4112.3	1614.1	1045.3	823.8	694.5	661.7	7020.4	2115.8	3060.7	1499.4	4697.3	2568.8	997	768.1	973.7	1443.6		0.469069	0.786402	0.697968	0.997031	1.13929	0.817953
509	509	4381	Q8BJM3	Coiled-coil domain-containing protein R3HCC1L OS=Mus musculus OX=10090 GN=R3hcc1l PE=1 SV=1	R3hcc1l	84.4	4.87	1947	34	117	20	0	817.8	546.2	392.6	575.7	938.2	743.1	592.5	377.3	518.7	945.6	701.3	590.2	364	597.1	664.2	759.3	594.9	398.2	562.3	859.1	886.7	514	102	415.8	763.6	752.9	613.1	418.9	582	974.1		1.11026	1.03477	1.01319	1.12204	1.03014	1.06208
510	510	152	Q8BFZ3	Beta-actin-like protein 2 OS=Mus musculus OX=10090 GN=Actbl2 PE=1 SV=1	Actbl2	42	5.49	14865	27	881	7	0		45.5	112.2		15.3		49.4	229.6		22.6		113.1	172.5		32.8		31.7	150		17.4		147	439.6		34.1		32.1	129.4		20.1		0.563589	0.649798	NA	NA	0.889381	0.700922
511	511	4453	Q61686	Chromobox protein homolog 5 OS=Mus musculus OX=10090 GN=Cbx5 PE=1 SV=1	Cbx5	22.2	5.86	3020	58	188	12	1	1725.7	572.8	1427.8	1081.9	2354.2	3108.6	717.1	2922.3	1482.3	4179.2	3699.7	1255.2	4781.7	2121.7	6023.3	1893.9	389.2	1991.8	1005	2489	2977.5	1103.6	2267.5	2263.9	6159.5	1818.1	580.8	1503.3	1255.4	4013		0.514424	0.809929	0.584861	0.846927	0.960232	0.743274
512	512	3377	P08249	Malate dehydrogenase, mitochondrial OS=Mus musculus OX=10090 GN=Mdh2 PE=1 SV=3	Mdh2	35.6	8.68	3646	54	195	15	0	1239.5	1661.2	2132	1016.8	714.1	2173.8	1843.5	2601.2	1128.5	1339.8	4012.8	2654.3	2968.2	813.3	4632	2010.8	1054.3	2568.1	952.6	852.5	4861.9	3622.9	14192.3	1094.5	4562	2126.7	1418.3	1865.2	908.9	1188		0.717054	0.769352	0.978333	0.805405	0.8867	0.831369
513	513	4201	Q91VM5	RNA binding motif protein, X-linked-like-1 OS=Mus musculus OX=10090 GN=Rbmxl1 PE=1 SV=1	Rbmxl1	42.1	9.99	6822	46	429	22	0	318.7	241.8	998.7	149.1	273.5	478.9	327.5	1629.3	512.9	541.6	511.7	458.1	1363.7	212.1	279.4	394.7	99.4	1191	154.2	276.3	372.9	587.1	729	455.2	327.5	541.7	263.5	1379.2	331.6	459.6	Acetyl [N-Term]	0.846498	0.80458	1.13113	0.64652	0.848597	0.855466
514	514	1366	Q99PT1	Rho GDP-dissociation inhibitor 1 OS=Mus musculus OX=10090 GN=Arhgdia PE=1 SV=3	Arhgdia	23.4	5.2	2659	62	211	10	0	1085.5	1404.2	2021.5	1845	904.8	2156.2	1664.6	3117.1	2151.3	1698.8	4322.1	2922.7	4638.4	2670.5	7342.5	1349.7	1124.5	2568.9	2305.8	1079.3	7097.8	3379.2	15215.5	4105.1	8079.6	1722.1	1150.6	1870.3	1566.7	1397.9	Acetyl [N-Term]	0.600013	0.691217	0.798674	0.728257	0.822875	0.728207
515	515	2938	P16951	Cyclic AMP-dependent transcription factor ATF-2 OS=Mus musculus OX=10090 GN=Atf2 PE=1 SV=2	Atf2	52.3	7.23	1315	48	111	18	3	786.8	1142.3	430.9	1120.5	709.6	704.5	1204.1	397.5	1058.3	689.5	604.2	1077.3	338.8	1057.9	356.9	783.7	1201.8	411.4	1211.1	672.9	447.1	964.7	210	930.9	398	743.5	1141.5	382.9	1030.6	645.5	Acetyl [N-Term]	0.96327	0.948011	1.05536	0.973826	0.936186	0.97533
516	516	516	P63323	40S ribosomal protein S12 OS=Mus musculus OX=10090 GN=Rps12 PE=1 SV=2	Rps12	14.5	7.24	10688	67	465	10	0	5101.2	3246.9	4122.2	6084.3	4484.3	6500.4	3137.8	7621.8	9414.4	6161.1	7321.4	4605.7	9705.6	9215.6	8432.5	5364.2	1989.9	4460.4	5960.4	4068.7	5042	4066.7	4355.3	11501.5	9042	5052	2685.9	3953.9	8100.7	6446.8	Acetyl [N-Term]	0.518762	0.855982	0.777183	0.860458	1.04637	0.811751
517	517	170	Q6KCD5	Nipped-B-like protein OS=Mus musculus OX=10090 GN=Nipbl PE=1 SV=1	Nipbl	315.3	7.91	1174	10	136	22	0	645.3	426.7	448.4	633	999	720.6	550.4	442.3	662.9	1306.4	620.6	529	453.7	714.1	810.7	657.5	462.2	491.3	690.1	1077.8	652.2	637.9	512.9	568.8	973.9	717.4	481.2	486	625.2	1072.7		1.0988	0.874273	0.995559	0.943129	0.821111	0.946575
518	518	3667	Q9R1C0	Transcription initiation factor TFIID subunit 7 OS=Mus musculus OX=10090 GN=Taf7 PE=1 SV=1	Taf7	39.1	5.33	3217	60	189	18	0	1650.5	1558.1	1567.1	2435.1	1650.5	1979.7	1862.3	1605.3	2498.6	1602.7	1412	1576.6	1355.9	2196.4	818.7	1638.9	1486	1567.9	1983	1364.3	977.8	1364.6	387.1	1915.5	825.5	1836.5	2016	2027.7	2602.4	1843.4		1.26313	1.08253	0.927666	1.04154	1.15018	1.09301
519	519	3492	Q8C3W1	Uncharacterized protein C1orf198 homolog OS=Mus musculus OX=10090 PE=1 SV=1	Q8C3W1	35.3	5.24	3871	65	232	14	0	1979.6	1650.4	2008.7	2101.5	3538	1918.3	1941.6	2574.5	2113.1	3694.7	1522.2	1767.6	2132.2	2277.1	2081.3	1698.6	1884.3	1919	2059.9	3366.8	2286.1	1805.3	940.4	2002.9	2466.3	2073.7	2098.6	2367.3	2107	3064.5		0.919518	1.08086	1.08101	0.997113	0.829431	0.981587
520	520	732	Q9DCX2	ATP synthase subunit d, mitochondrial OS=Mus musculus OX=10090 GN=Atp5h PE=1 SV=3	Atp5h	18.7	5.69	4567	81	348	13	0	5549.9	6392.2	5473.9	9054.3	5714.6	5125	6554.4	5475.8	9158.1	5773.3	4567.2	5049.1	5383.7	8361.1	3769.7	5692.5	6932.9	5457.7	9948.1	6039.8	3323.8	6731.5	3192.2	8928.2	4070.8	5312.7	6169.2	5053.3	8844.8	5320.3		0.922842	0.94123	1.03662	0.96579	0.921535	0.957604
521	521	4540	Q810U5	Coiled-coil domain-containing protein 50 OS=Mus musculus OX=10090 GN=Ccdc50 PE=1 SV=1	Ccdc50	35.3	6.89	5621	59	241	17	0	6101.7	5564.8	6713.4	6762.7	6576.4	6531.5	6209.9	6455.2	7546.4	7522.1	5993	7611.5	6686.3	9398	4995	5619.4	6342.7	7257.5	6966.3	6807.9	5389.9	5875.8	2802.5	7428.2	5160.9	6120.9	6726.5	7022.5	7279.6	7676.1	Acetyl [N-Term]	1.08788	1.08319	0.937135	0.964645	1.02047	1.01867
522	522	3208	Q811L6	Microtubule-associated serine/threonine-protein kinase 4 OS=Mus musculus OX=10090 GN=Mast4 PE=1 SV=3	Mast4	283.8	8.62	1046	13	76	24	1	137.1	293.6	155	168.8	73.4	135.1	328.9	159.5	194.4	111.3	106	316.4	133.2	201.5	56.4	115.2	299.4	386	176.7	91.8	112.3	281.1	180.9	167	98	132.7	307.3	236.9	211.5	98.8		1.48527	0.934327	0.982235	1.08796	0.887691	1.0755
523	523	2004	Q9DBJ1	Phosphoglycerate mutase 1 OS=Mus musculus OX=10090 GN=Pgam1 PE=1 SV=3	Pgam1	28.8	7.18	2319	52	156	12	0	980.8	852.3	1967.5	1185.9	1258.2	1035.3	817	1724.5	960.8	1466	1537.3	887.6	2043.6	1071.7	2343	1011.6	730.9	2134.1	780.3	1110.1	1570.9	1214.7	7465.3	1182.2	2507.1	1023.3	656.1	2069.5	950.9	1402.1		1.20006	0.80306	0.988409	0.989696	0.956412	0.987527
524	524	1252	Q6P6I6	DNA-directed RNA polymerase II subunit GRINL1A OS=Mus musculus OX=10090 GN=Polr2m PE=2 SV=2	Polr2m	41.2	6.55	2003	60	110	17	0	1289.2	803.1	576.8	1297.9	1215.9	1054.2	779.9	498.8	1137.6	1048.5	919.5	705.7	477.2	1075.4	946.2	1280.4	928.2	552.1	1261.3	1102.9	714.7	657.5	236.8	1092.9	1053.4	1017.5	773.4	644.4	1120.9	1047.3		1.2919	0.991666	0.965187	0.98532	0.998856	1.04659
525	525	3116	Q8C3J5	Dedicator of cytokinesis protein 2 OS=Mus musculus OX=10090 GN=Dock2 PE=1 SV=3	Dock2	211.6	6.99	1149	13	93	20	0	794.2	761.7	461.8	1134.4	382.2	822.9	1024	528.1	1292.2	472.4	840.9	1529.9	540.5	1427.5	450.1	752.1	863.9	526.6	1210.1	398.8	1134.5	1241.7	1729.4	1289.9	494.8	864.6	984.8	496	1213	456.3		0.939216	0.961719	1.05067	0.938709	0.965919	0.971247
526	526	464	Q61189	Methylosome subunit pICln OS=Mus musculus OX=10090 GN=Clns1a PE=1 SV=1	Clns1a	26	4.12	7869	42	279	6	0	2481	2743.2	2770.2	2933.3	2266.8	2586.4	3031.1	3248.1	3400.7	3396.4	2388.6	3119.1	3352.4	3841	2051.8	2288.4	2336.9	3098.2	2714.9	2767.6	1215.9	2727.7	1221.1	3440.2	2055	2013.1	2587.4	2529.1	3521.5	3610.2		0.77864	0.853617	0.778341	1.03552	1.06295	0.901814
527	527	4631	Q91X72	Hemopexin OS=Mus musculus OX=10090 GN=Hpx PE=1 SV=2	Hpx	51.3	7.8	4317	39	236	17	0	2494.4	2239.1	2839.1	1586.7	2799	2379.9	1476.1	2465.2	1320.2	2469.5	2870.9	2112.3	2857	1384.1	3673.1	2463.3	2092.1	1383.5	1667.4	2691.9	5406.5	3319.8	4333.6	1257.1	2999.5	3171.4	1865.6	2796.9	1297.9	2371.2		1.13455	1.26387	1.33258	0.983109	0.960194	1.13486
528	528	3308	Q9Z1X4	Interleukin enhancer-binding factor 3 OS=Mus musculus OX=10090 GN=Ilf3 PE=1 SV=2	Ilf3	96	8.76	1451	27	99	16	0	188.3	119.9	431.7	253.2	343.7	266.8	277.5	1019.8	436.5	1135.8	351.7	276.3	671.2	300.2	541.3	255.6	111.8	1069.8	271.9	627.6	262.1	335.7	1012.4	378	670.3	238.8	163.7	647.1	287.7	766.2		0.634536	0.58991	0.895052	0.659107	0.674591	0.690639
529	529	2230	Q69ZQ2	Pre-mRNA-splicing factor ISY1 homolog OS=Mus musculus OX=10090 GN=Isy1 PE=1 SV=2	Isy1	33	5.17	4932	53	273	18	0	7441.8	6128.8	5560.8	7577.7	5374.1	6365	5918.6	4538.7	6347.6	4373.5	5386	4432.8	4294.7	6288.9	2329.6	7161.3	6759.3	5408.2	7395.9	4832.6	3533.7	4306.7	1435.8	5443.7	2219.9	6075	5968.5	4980.7	6614.4	4679		1.09738	1.00843	0.954438	1.04203	1.06985	1.03443
530	530	2906	O35551	Rab GTPase-binding effector protein 1 OS=Mus musculus OX=10090 GN=Rabep1 PE=1 SV=2	Rabep1	99.5	5.01	1309	34	108	28	0	216.8	371.1	17.1	195.2	125.8	372.3	647.6	29	314.8	281.8	366.8	921.1	21.9	347.6	330.2	239.1	279.6	14.6	178.2	134.1	529.6	810.9	9.2	401.5	365.8	262.2	488.7	20.8	309	275.9	Acetyl [N-Term]	0.717241	0.754632	0.704271	0.981576	0.979063	0.827357
531	531	1844	Q8BIQ5	Cleavage stimulation factor subunit 2 OS=Mus musculus OX=10090 GN=Cstf2 PE=1 SV=2	Cstf2	61.3	6.83	4384	36	204	14	8	2671.2	2570.1	2310	3507.4	3372.9	2497.7	3144.1	2032	3049.9	3237.6	2380.3	2833.5	2071.9	3197.9	2263.9	2886.6	2955.6	2731.3	4552	3296.3	1997.7	2849	1654.4	3368.1	2558.3	2547.5	2328	1908.8	2797.5	2828.6		0.93937	0.740434	1.01994	0.917243	0.873672	0.898132
532	532	1417	Q9JJU8	SH3 domain-binding glutamic acid-rich-like protein OS=Mus musculus OX=10090 GN=Sh3bgrl PE=1 SV=1	Sh3bgrl	12.8	4.92	5099	94	286	12	0	5262.8	3304.2	4907.8	6405	4825.3	5195.8	4149.8	6212.5	6376.2	5661.2	4180.5	3503.3	6564.5	6643	4668.2	5298.5	2997.6	5293.1	6811.6	5220.8	5778.1	3493.3	4131.7	6835.1	5431.3	4647	3133.7	4546.7	6310.9	5406.6		0.731863	0.755145	0.894376	0.989759	0.955027	0.865234
533	533	2138	Q9D7S9	Charged multivesicular body protein 5 OS=Mus musculus OX=10090 GN=Chmp5 PE=1 SV=1	Chmp5	24.6	4.79	4887	45	227	8	0	5533.7	2715.2	4966.7	4473.8	7360.9	5085.5	2906.1	4214	3786.5	5911.6	3643.3	2577.7	3669.8	3520.8	3207.8	5347.5	3063.1	4630.4	4148.9	6932.1	4320.6	2347.8	1476.8	3304.7	3573.6	5203.7	3050.6	5578	3797.3	5963.1		1.32368	1.04972	1.02324	1.00285	1.00871	1.08164
534	534	669	Q9Z1D1	Eukaryotic translation initiation factor 3 subunit G OS=Mus musculus OX=10090 GN=Eif3g PE=1 SV=2	Eif3g	35.6	5.9	2493	51	147	16	0	1574.9	1436.9	1727.8	1185.9	2547.9	1600.5	1603.7	1989.5	1241.7	3287.3	1570.5	1142.3	1695.3	1156.4	2376	1648.5	1205.9	2154.7	1165.6	2953.8	1149.5	1585.2	1718.1	1233.7	2546.2	1645.6	1179.3	1401.6	954.1	2482.8		0.704499	0.735362	1.02818	0.768382	0.75527	0.798338
535	535	3282	Q8BFW7	Lipoma-preferred partner homolog OS=Mus musculus OX=10090 GN=Lpp PE=1 SV=1	Lpp	65.8	7.37	1843	44	142	17	0	2573.2	2578.2	1130	3214.4	2081.7	2442.4	3123.7	1278	3527.3	2906.6	2213.4	2944.5	1035.5	4223.2	2251.4	2057.8	2627.3	1303	3864.2	2586.2	3594	2889.2	1183.6	3522.3	2577	2970.7	3279.4	1217.6	3141.8	2300.8	Acetyl [N-Term]	0.952739	1.04984	1.2163	0.89071	0.791578	0.980235
536	536	1638	Q9R0L6	Pericentriolar material 1 protein OS=Mus musculus OX=10090 GN=Pcm1 PE=1 SV=2	Pcm1	228.7	5.01	1026	17	84	26	0	337.7	1588.1	42.7	30.2	224.1	334.7	1729.6	58.3	41.1	156.4	388	1831.6	53	36.4	131.1	312.2	1601	40.5	27.2	188.3	303.7	1659	21.8	46.5	86.9	342.8	1756.6	41.1	33.5	167.5		0.704974	1.01561	1.0242	0.815085	1.07097	0.926169
537	537	817	Q78PY7	Staphylococcal nuclease domain-containing protein 1 OS=Mus musculus OX=10090 GN=Snd1 PE=1 SV=1	Snd1	102	7.43	1239	33	91	23	0	153	66.7	502		211	179.6	78.4	542.8		156.4	234.8	111.4	578.3		183.3	173.8	81.4	490.4		83.4	219.4	115	1808.2		173.2	182.5	69.6	483.7		173		0.89112	0.887755	1.01615	NA	1.10614	0.97529
538	538	102	Q9Z1N5	Spliceosome RNA helicase Ddx39b OS=Mus musculus OX=10090 GN=Ddx39b PE=1 SV=1	Ddx39b	49	5.67	2417	46	129	14	5	596.1	214.2	1193.3	227.4	412.4	1302.5	212.7	1722.5	226.1	751.2	2645.8	276.6	2381.4	242.6	2800.5	1092.8	132.3	1473	168.8	468.1	2735.9	405.9	9503.2	307.5	2566.3	940.2	154.3	942.2	233.6	618.2	Acetyl [N-Term]	0.546996	0.725435	0.721843	1.03317	0.82295	0.770079
539	539	810	Q8K3C3	Protein LZIC OS=Mus musculus OX=10090 GN=Lzic PE=1 SV=1	Lzic	21.5	4.96	4457	61	208	12	0	2228.5	1644.7	1889.6	1778.3	1710.1	2149.2	1443.1	2213.7	2419.6	2563.8	1958.2	1806.6	2555.7	3353.5	2225.5	1792.3	1638.3	1735.4	1681	1582.3	1923.8	1519.8	1055.7	2780.6	2396.6	2052.9	1462.9	2357.4	2555	2721		1.06491	1.01372	0.955193	1.05596	1.06132	1.03022
540	540	788	Q08943	FACT complex subunit SSRP1 OS=Mus musculus OX=10090 GN=Ssrp1 PE=1 SV=2	Ssrp1	80.8	6.76	2153	25	137	18	0	2091.1	1928.6	2092	2148.2	1366.9	2165.9	3593.1	3584.6	4840.6	3473.6	2287.7	2436.9	2297.2	1956.4	1240.7	3378.2	2023.7	3619.9	2133	3427.9	1174.4	3528.9	1628.4	4004.6	1871.5	2560.8	2300.1	2481.5	2917.7	1923.1	Acetyl [N-Term]	0.692267	0.640144	1.18233	0.602756	0.553633	0.734225
541	541	1764	Q9CQZ1	Heat shock factor-binding protein 1 OS=Mus musculus OX=10090 GN=Hsbp1 PE=1 SV=1	Hsbp1	8.6	4.31	2075	83	106	6	0	1681.1	1512.3	638.1	672.3	833.4	1518.3	1190.1	674.5	795.9	1057.7	1393.4	1352.1	697	890.2	1092.9	1577.8	1523.6	621.9	596.4	737.2	1148.2	1286.2	269.9	736.1	1127.6	1420.3	1442.8	674.2	782.1	1146.4		0.999555	1.21234	0.935454	0.982661	1.08386	1.04277
542	542	2473	Q9CWK8	Sorting nexin-2 OS=Mus musculus OX=10090 GN=Snx2 PE=1 SV=2	Snx2	58.4	5.12	2838	34	136	16	2	445.6	218.2	649.7	240.8	257.2	623.4	250.7	975.9	263.2	271.4	950.5	280.7	1073	198.8	699.8	565.2	231.1	718.9	210.3	225.8	902.2	326.8	3192.4	235.7	643.5	557.5	199.1	671.1	289.9	293.3		0.687673	0.794176	0.894289	1.10144	1.08069	0.911655
543	543	3797	P09602	Non-histone chromosomal protein HMG-17 OS=Mus musculus OX=10090 GN=Hmgn2 PE=1 SV=2	Hmgn2	9.4	9.99	3444	76	308	13	0	11071.4	17358.4	8413.2	13310.8	10863.8	10668.3	19989.6	9499.5	13731.4	12936.6	12536.7	25180.2	10751.2	19770.2	9343	9424.6	17149.8	8866.7	14145.3	12663.3	14356.7	19408.1	3672.2	15311.3	14619.3	9988.4	20444	8678	12688.8	12693.7		0.913522	1.02273	0.936269	0.924072	0.981224	0.955564
544	544	3668	Q6ZQ58	La-related protein 1 OS=Mus musculus OX=10090 GN=Larp1 PE=1 SV=3	Larp1	121.1	8.79	2519	20	148	16	0	1227.8	918.3	653	1324.5	1444	1132.4	1147.3	645.8	1764.2	2214.3	930.7	1078.5	568.8	1367.8	781.7	1105.7	889.6	692.3	1604.6	1580.4	564.8	1186.4	287.1	1125.1	838.8	1371.2	1012.4	693.8	1670.2	2161.8	Acetyl [N-Term]	1.07433	0.88242	1.21088	0.946718	0.97629	1.01813
545	545	1953	Q3UW53	Protein Niban OS=Mus musculus OX=10090 GN=Fam129a PE=1 SV=2	Fam129a	102.6	4.78	4313	17	117	9	0	617.1	465.1	723.7	564	1151.2	630.3	612.5	749.6	545.7	1138.4	464.5	634.5	631.6	677.3	899.6	561.1	566.3	907.4	676.7	1149	931.5	631.2	892.2	526	1174.8	822.9	571.6	719.6	483.8	1074		0.959979	0.933224	1.30557	0.886568	0.943429	1.00575
546	546	711	Q8WTY4	Anamorsin OS=Mus musculus OX=10090 GN=Ciapin1 PE=1 SV=1	Ciapin1	33.4	5.2	3742	67	183	14	0	3850.5	2444.1	1951	1629.8	2628	3377.3	2298.1	2301.5	1713.2	2862.4	3320.6	2671.1	2706.9	2235	2676.5	3458.3	1970	1960.4	1743.5	2394.3	2407.5	2364.7	1266	1997	2673.2	3600.6	1885.7	1632	1931.3	3208.7	Acetyl [N-Term]	0.709103	0.820547	1.06612	1.12731	1.12098	0.968811
547	547	2691	O54786	DNA fragmentation factor subunit alpha OS=Mus musculus OX=10090 GN=Dffa PE=1 SV=2	Dffa	36.6	4.91	3501	52	151	14	0	1005.1	1274.6	683.1	975.2	913.7	1366.5	1379.4	851.6	1332.7	1249.6	1721.3	2058.2	1100.3	2071.2	1629.8	1014.3	1042.5	685.4	908.6	565.6	2288.4	1638.9	560.3	2155	1952.3	875	1254.1	643.3	1324.4	1227		0.755402	0.909163	0.640322	0.993772	0.981914	0.856115
548	548	2815	Q3TLD5	Unconventional prefoldin RPB5 interactor OS=Mus musculus OX=10090 GN=Uri1 PE=1 SV=2	Uri1	59	5.07	3282	38	141	14	0	1151.6	1354.1	588.1	1201.3	479.6	1022.9	1332.1	688.7	1482	570.7	939.7	1351.9	723.3	1426.9	308.6	1160.1	1345.3	642.1	1193.8	569	551.9	1168.8	351.5	1299.9	351.1	1035.9	1234.5	638.6	1408.1	571.6		0.927254	0.926732	1.01271	0.950135	1.00158	0.963681
549	549	4422	P32261	Antithrombin-III OS=Mus musculus OX=10090 GN=Serpinc1 PE=1 SV=1	Serpinc1	52	6.46	2793	43	202	20	0	2035.4	1220.4	1570.5	712.3	1435.6	2942.9	1299.5	2363.4	550	1477.8	3240.7	1872.1	3104.4	776.6	2362.4	1993.2	919.1	1420.5	448.4	1127.7	4686.5	2153.3	2674.9	695.8	2228.8	2343.4	1134.9	1909	577.6	1556.2		0.807735	0.873336	0.796289	1.05018	1.05305	0.916119
550	550	4361	Q00897	Alpha-1-antitrypsin 1-4 OS=Mus musculus OX=10090 GN=Serpina1d PE=1 SV=1	Serpina1d	46	5.44	6053	30	279	11	1	449.4	777.6	1145.5	229.7	819.6	768.4	911.9	1483.1	294.5	955.8	1163.2	1302.2	2405.9	609.7	2358.6	515.3	564.4	1021.4	181.4	579.3	1669.4	1707	2152.3	650.6	2254.2	532.1	673.6	1118.6	232.1	1039.4		0.754231	0.738677	0.692478	0.788115	1.08747	0.812194
551	551	4056	P0DOV2	Interferon-activable protein 204 OS=Mus musculus OX=10090 GN=Ifi204 PE=1 SV=1	Ifi204	69.4	8.69	2214	29	125	14	8	582.7	360	838.7	464.2	954.5	771.4	387.3	828.2	492.6	1204.4	488.8	322.3	769.1	796.2	865.5	511.9	368.1	927	574.9	749.2	730.2	432.2	1045	575.3	1069.5	690.4	421.8	696.3	412.5	1071.3		0.840739	1.08908	0.894996	0.837393	0.889489	0.910339
552	552	1865	Q8R081	Heterogeneous nuclear ribonucleoprotein L OS=Mus musculus OX=10090 GN=Hnrnpl PE=1 SV=2	Hnrnpl	63.9	8.1	3030	31	129	14	0	470.9	445.9	828.4	28.1	721.2	643	446.2	983.3	48.6	1021.4	1116.9	618.8	1212.5	32	2374.4	637.8	375.5	850.9	25.2	833.8	1226.6	812.5	4672.7	40.9	2451	612.5	348	692.1	31.8	907.4		0.703854	0.779919	0.952566	0.654321	0.888388	0.79581
553	553	3988	P80313	T-complex protein 1 subunit eta OS=Mus musculus OX=10090 GN=Cct7 PE=1 SV=1	Cct7	59.6	7.84	1933	40	137	17	0	506.4	807.5	2288.5	57	267.1	1080.6	755.4	2188	31	474.5	2371.7	1259.2	2099.2	27.1	2640	1151.8	381.1	2540.1	33.9	359.9	1709.1	1799.3	6505.6	49.3	2499.2	842.6	570.3	1782.9	29	398.1		0.814854	0.754964	0.779752	0.935484	0.838988	0.824808
554	554	1314	Q9DCD0	6-phosphogluconate dehydrogenase, decarboxylating OS=Mus musculus OX=10090 GN=Pgd PE=1 SV=3	Pgd	53.2	7.23	2528	34	112	13	0	353.5	202.7	615.7		182.6	408	204.3	702.1		257.7	575.2	456.4	902		1147.1	436.6	89.5	686.3		198.8	681	460.7	4649.2		1183.3	364.8	232.8	420.3		233.7		0.598633	1.1395	0.894118	NA	0.906868	0.88478
555	555	3499	P80317	T-complex protein 1 subunit zeta OS=Mus musculus OX=10090 GN=Cct6a PE=1 SV=3	Cct6a	58	7.08	2481	39	157	18	0	291.1	263.7	1042.2	131.6	253.5	604.3	258	1243.6	113.5	339.9	1124.6	344.5	1509.2	157.3	1012.6	547	219	1191.5	93.4	254.1	890.1	599.2	4658	151.1	1012.1	473.9	207.5	748	133	300.2		0.60148	0.804264	0.784213	1.17181	0.883201	0.848993
556	556	4010	P62908	40S ribosomal protein S3 OS=Mus musculus OX=10090 GN=Rps3 PE=1 SV=1	Rps3	26.7	9.66	3500	63	175	15	0	978.4	1413.3	3643.9	174.7	639.9	1719.1	1386.2	3573.8	149.5	1076.3	3369.3	2198.4	3992.7	153.9	4454.4	1807.1	772.2	3883.9	99.6	855.8	2307	3187.9	13308.7	164.8	3783.1	1555.6	984.8	2427.9	141.7	891.7		0.679361	0.710431	0.904892	0.947826	0.828486	0.814199
557	557	246	O70230	Zinc finger protein 143 OS=Mus musculus OX=10090 GN=Znf143 PE=1 SV=2	Znf143	69	6.19	1922	27	120	13	0	605.9	989	626	336.4	487.5	547.5	1109.9	565	270.7	474.8	446	1043.7	524.1	264.2	220.5	629.3	967	746.3	371.2	364.9	360.8	898.4	198.9	267.8	261.9	474.2	978.5	524.2	335.8	396.3		0.927788	0.881611	0.866119	1.24049	0.834667	0.950134
558	558	1143	P52503	NADH dehydrogenase [ubiquinone] iron-sulfur protein 6, mitochondrial OS=Mus musculus OX=10090 GN=Ndufs6 PE=1 SV=2	Ndufs6	13	8.65	5696	66	242	9	0	13444.5	9989.3	13845	12507.8	11436.3	11556.9	10466.8	11603.7	9990.3	10411.4	8213.7	7434.6	9595.2	10037.2	4723.2	11242	12363.3	12717.6	13426.7	12548.1	6705	7903.2	1742.4	8349.8	5157.5	12171.3	10258	13285.5	10159.6	10470		1.14494	0.980051	1.05316	1.01695	1.00563	1.04015
559	559	1409	Q61646	Haptoglobin OS=Mus musculus OX=10090 GN=Hp PE=1 SV=1	Hp	38.7	6.29	2996	39	152	14	0	3194.5	2594	2029.2	814.8	1097.1	1483.3	2865.1	1051.4	1055.4	2023.2	2217.1	1635.8	1145	740	943.5	8308.6	6711.1	1680.3	3890.4	1249.8	5709.2	1516.8	836.4	702.4	1008.6	1725.1	1382.3	1300.3	705.2	1505.2		1.23673	0.482461	1.16301	0.668183	0.74397	0.858872
560	560	3003	Q8BQ30	Phostensin OS=Mus musculus OX=10090 GN=Ppp1r18 PE=1 SV=1	Ppp1r18	65.6	5.39	2801	39	163	17	0	717.2	2590.3	787.2	1050.5	1238.9	720.8	3015	758.7	1086.6	1260.1	599.5	3148.7	738.8	1300.7	891.4	753.5	3274.6	980.9	1210.6	1169.6	988.4	3047.4	693	1072	1077.6	792.3	2549.6	822.6	993.1	1115.5		1.08422	0.845638	1.0992	0.913952	0.885247	0.965651
561	561	3556	Q9JM96	Cdc42 effector protein 4 OS=Mus musculus OX=10090 GN=Cdc42ep4 PE=1 SV=1	Cdc42ep4	37.8	5.36	3080	36	134	10	0	408.5	955	200.3	649	469	405.6	972.8	183.9	594.6	357	284.5	789.6	149	579	235.7	433	956.7	180	612	407.5	291.3	717.9	79.7	735.5	259.7	417.8	999.7	211.2	941.4	368		1.14845	1.02765	1.03008	1.58325	1.03081	1.16405
562	562	2302	P24270	Catalase OS=Mus musculus OX=10090 GN=Cat PE=1 SV=4	Cat	59.8	7.88	1703	39	90	17	0	594.7	516.2	909.7	37.5	698.3	721.1	497.2	1059.8	46.7	782.6	804.9	541.6	1103.2	35.8	1248.8	744.3	497.3	1067	51.4	833.8	827.1	539.8	3681.4	42.5	1162.3	654.3	423.3	791.6	28.3	720.5		0.746933	0.851368	0.907364	0.605996	0.920649	0.806462
563	563	3539	O35841	Apoptosis inhibitor 5 OS=Mus musculus OX=10090 GN=Api5 PE=1 SV=2	Api5	56.8	5.92	1820	38	114	16	0	426.5	173.1	418.3	55.3	340	660.3	227.4	813	64.6	605.5	2609	576.6	1198.1	84.9	3240.4	536.8	155	460	65.7	381.7	814	372.5	1970.5	70.2	2357.6	569	247.4	306.3	75.5	538.2		0.376753	1.08795	0.86173	1.16873	0.888852	0.876803
564	564	1548	Q61818	Retinoic acid-induced protein 1 OS=Mus musculus OX=10090 GN=Rai1 PE=1 SV=3	Rai1	201.4	8.75	1565	16	94	17	0	38.5	314.2	125.3	31.7	149.2	41.3	354.9	113.2	49.1	192	37.3	386.7	110	48.2	122.6	49	362.2	143.4	35.8	138.4	16.8	354	23.7	36.8	134.1	59.1	370.4	133	54.1	195.4		1.17491	1.04367	1.43099	1.10183	1.01771	1.15382
565	565	2550	Q9WU78	Programmed cell death 6-interacting protein OS=Mus musculus OX=10090 GN=Pdcd6ip PE=1 SV=3	Pdcd6ip	96	6.52	1172	31	94	23	0	224.9	56.9	500.1	42.8	297.2	310.4	48	761.7	59.3	386.9	448.7	101.6	883.1	61.9	686.9	254.3	48.8	595.1	42.8	281.7	535.2	104	3191.6	71.8	729.4	281.8	58.4	452.5	54.4	332.1		0.594066	1.21667	0.907861	0.917369	0.858361	0.898865
566	566	2657	Q52KI8	Serine/arginine repetitive matrix protein 1 OS=Mus musculus OX=10090 GN=Srrm1 PE=1 SV=2	Srrm1	106.8	11.87	4102	14	156	11	0	2447.1	2554.9	1556	454.5	2261.3	2598.2	1815.4	1491.3	345.2	2130.1	2282.2	1663.3	1836.3	381.4	2609	2763.6	2404.6	1422.9	436.2	1957.5	1252.6	2183.3	982.6	392.4	2331.2	2502.2	1935.7	1503.1	463.2	2756.9		1.00791	1.06627	0.963051	1.34183	1.29426	1.13466
567	567	3070	Q8CCS6	Polyadenylate-binding protein 2 OS=Mus musculus OX=10090 GN=Pabpn1 PE=1 SV=3	Pabpn1	32.3	5.17	6722	55	278	13	0	4320.7	4941.1	4268.1	2921.1	4230.8	5821	5989.3	4810.7	4718.3	5971.7	5321	4540	4558	4893.6	2987.3	5181.3	4012.7	5080.8	2822.4	4069.3	3397	5563.2	1364	4458.5	2717.4	4630.8	4699	4688.7	4120	6008.1	Acetyl [N-Term]	0.97464	0.784566	0.795533	0.873196	1.0061	0.886806
568	568	1799	O08997	Copper transport protein ATOX1 OS=Mus musculus OX=10090 GN=Atox1 PE=1 SV=1	Atox1	7.3	6.51	9835	88	634	7	0	9747.2	6914.5	10967	17278.1	12351	8874.5	7656.6	10169.1	16140.3	12243.1	8231	8673.9	9965.7	18417.8	8192.8	9752.5	7708.6	12171.2	18624.1	13375.2	11409.2	6561.2	4119.7	17253.4	9252.5	8906.7	7561.4	11164.1	15653.6	11398.6		1.09785	0.987566	1.00363	0.969846	0.931022	0.997982
569	569	377	P37913	DNA ligase 1 OS=Mus musculus OX=10090 GN=Lig1 PE=1 SV=2	Lig1	102.2	6.81	1617	20	134	17	0	2119.4	1809.7	1374.7	4361	2332.5	1736.1	2080.7	995.2	2711.7	2008.8	1389	1787.9	988.4	3037.5	989.5	2050.6	2273.5	1498.9	4370.6	2609.7	698.8	1933.5	402.2	2183.1	1047.1	2196.3	2061.6	1368.9	3011.7	1629.8		1.3755	0.99082	1.26508	1.11063	0.81133	1.11067
570	570	3018	P70429	Ena/VASP-like protein OS=Mus musculus OX=10090 GN=Evl PE=1 SV=2	Evl	44.3	8.85	3959	39	177	16	0	3263.2	1292.4	2758	855.8	2162.2	3309.2	1502.6	2583.3	1031.9	2139.6	2580.9	1785.2	2438.8	1440.5	2386.9	3048.1	1413.7	3297.8	1273.9	1589	4616.8	1576.5	2801.7	1036.7	2783.5	4758.8	1435.7	2881.6	958.8	2247.3		1.11547	0.955477	1.43805	0.92916	1.05034	1.0977
571	571	373	Q80TK0	Uncharacterized protein KIAA1107 OS=Mus musculus OX=10090 GN=Kiaa1107 PE=1 SV=5	Kiaa1107	148.6	6.51	1108	22	62	20	0	85.3	48.8	17.2	46.6	193	77.5	66.1	28	24.3	180	62.4	71.6	40	47.4	73.8	83.2	52.5	20.7	36.8	174.2	14.8	41.8	23.3	38.1	75.4	74.1	82.4	29.3	31	167.3		1.04643	1.2466	0.956129	1.27572	0.929444	1.09086
572	572	4434	P62880	Guanine nucleotide-binding protein G(I)/G(S)/G(T) subunit beta-2 OS=Mus musculus OX=10090 GN=Gnb2 PE=1 SV=3	Gnb2	37.3	6	3010	49	136	13	5	762.8	781.6	1282.3	288.7	336.8	992	843.7	1837.8	292.6	361.3	1094.6	849	1601.9	209.2	1109.4	1032.6	648.3	1578	139.2	270.7	1659.1	1089	6799.1	307.5	1199.8	1032	677.2	1259.6	250.7	434.4	Acetyl [N-Term]	0.685385	0.802655	1.04032	0.856801	1.20232	0.917498
573	573	4596	P10853	Histone H2B type 1-F/J/L OS=Mus musculus OX=10090 GN=Hist1h2bf PE=1 SV=2	Hist1h2bf	13.9	10.32	24290	62	1372	10	7	38777.9	111560	101131	38606.2	22802.2	34905.4	84550.2	80482.3	51876.5	19129.5	84203.9	87681.4	74976.9	19558.1	78660.1	55421.9	92243.3	101408	28556.7	30351.5	19682.1	98975.6	85807.5	79222.9	64719.9	22078.9	89669.5	75300.8	68813.1	21680.4		0.935619	1.06055	0.632535	1.32648	1.13335	1.01771
574	574	45	Q3UMT1	Protein phosphatase 1 regulatory subunit 12C OS=Mus musculus OX=10090 GN=Ppp1r12c PE=1 SV=1	Ppp1r12c	84.6	6	1136	32	73	19	0	20	211.1	65		229.8	28	323.9	127.6		274.2	30.3	394.7	143.5		243.2	20.1	222.4	82.8		132.9	26.9	283.4	95.2		227.1	23.4	277.9	62.6		213.8		0.490596	0.857981	0.835714	NA	0.779723	0.741003
575	575	3791	Q8K4L3	Supervillin OS=Mus musculus OX=10090 GN=Svil PE=1 SV=1	Svil	243	6.87	1277	12	83	15	0	236.1	155.6	316.9	420.8	495.4	285.6	219.3	391.5	513.4	526.9	213.8	181.1	303.8	448.3	291.2	251.2	190.1	340.6	463.4	458.1	298.2	159.3	211.3	411.1	340.4	295.8	221.3	416.2	509.3	530.5		1.06309	1.00912	1.03571	0.992014	1.00683	1.02135
576	576	4529	Q8CG19	Latent-transforming growth factor beta-binding protein 1 OS=Mus musculus OX=10090 GN=Ltbp1 PE=1 SV=2	Ltbp1	186.6	6.02	1212	15	90	21	0	439	603.8	285.8	83.9	330.4	545.1	754.3	269.4	98.8	404.1	564	831.5	301.6	152.4	433.9	374.4	716.9	227.3	43.3	261.9	846	837.2	200.1	103	394.8	435.8	829.2	392.8	100.3	390.1		1.45805	1.0993	0.799486	1.01518	0.965355	1.06748
577	577	881	Q80X19	Collagen alpha-1(XIV) chain OS=Mus musculus OX=10090 GN=Col14a1 PE=1 SV=2	Col14a1	192.9	5.1	1196	18	99	24	0	334.3	26.6	244.3		208	568.8	19.9	392.6		311.7	603	48.5	411.3		471.5	333.2	4.7	251.3		184.2	1260	53	1148.5		494.6	398.1	6	271.1		285.6		0.690525	0.301508	0.699895	NA	0.916266	0.652048
578	578	3765	Q9D8S9	BolA-like protein 1 OS=Mus musculus OX=10090 GN=Bola1 PE=1 SV=1	Bola1	14.4	8.76	6331	75	217	9	0	3298.3	2069	2006.4	3718.4	2551.9	2682.1	2108.5	2010.6	2820.9	2093.4	2170.5	1487.1	2190.8	2499.4	1229.6	3085.7	2267.3	2156.4	3716.6	2609	1363.5	1629.3	1381.7	2314.2	1143.3	2819.5	1972.2	1858.7	2971.3	2014.2		0.92445	0.935357	1.05123	1.05332	0.962167	0.985304
579	579	2528	Q9WV02	RNA-binding motif protein, X chromosome OS=Mus musculus OX=10090 GN=Rbmx PE=1 SV=1	Rbmx	42.3	10.05	6281	46	386	22	19	5648.6	6601.6	5238.4	2095.7	3124.1	8414.7	7794.1	11028.8	7132.5	7862.5	9193.8	9596.5	10222.9	3064.3	5609.2	6587.4	3328.1	6385.4	2131.8	3225.1	7338	12518.9	7100.1	6011.6	6084.9	9396.8	7146.4	7531.9	4606.7	7063.9	Acetyl [N-Term]	0.68293	0.916899	1.11671	0.645875	0.898429	0.852169
580	580	2416	O35658	Complement component 1 Q subcomponent-binding protein, mitochondrial OS=Mus musculus OX=10090 GN=C1qbp PE=1 SV=1	C1qbp	31	4.92	9539	35	581	8	0	1818.6	1398.5	2591.4	1285	2367.6	1887.6	1260.5	2787.3	2178.8	1814.4	1531.4	1307.4	2568.8	1696.3	1227.1	2044.6	1012.6	2656.6	1086.8	2001.9	671.7	1285.1	442.6	2032	1058.8	1464	1215.7	2583.6	2229.4	1765.1		0.926919	0.964459	0.775588	1.02322	0.972828	0.932603
581	581	2304	P62962	Profilin-1 OS=Mus musculus OX=10090 GN=Pfn1 PE=1 SV=2	Pfn1	14.9	8.28	5281	76	253	9	0	1099	2119.8	2998.7	608.9	2580.8	2217.4	2073	3446.3	790.5	3666.8	5124.9	3183.1	4188.9	817.1	21000.7	2018.9	1016.1	3330.4	477	2593.9	9734.7	6135	28659.7	1326.1	19605.6	1759.9	1244.7	2325.5	554.2	3148.9	Acetyl [N-Term]	0.674782	0.600434	0.793677	0.701075	0.85876	0.725746
582	582	4393	Q9DAZ9	Abscission/NoCut checkpoint regulator OS=Mus musculus OX=10090 GN=Zfyve19 PE=1 SV=2	Zfyve19	43.2	6.54	2040	59	111	16	0	513.1	668.8	296.7	141.2	470.4	431.3	734.8	240.7	115.1	451.4	333.5	432.2	198	121.9	350.7	539.2	792.7	303.9	134.2	409.9	322.1	481.5	91.4	109.6	284.9	495	627.4	304.2	119.4	443.6		1.26381	0.853838	1.14769	1.03736	0.98272	1.05708
583	583	1847	Q9Z204	Heterogeneous nuclear ribonucleoproteins C1/C2 OS=Mus musculus OX=10090 GN=Hnrnpc PE=1 SV=1	Hnrnpc	34.4	5.05	5168	33	298	14	0	3756.7	2748.6	2960.4	1870.8	1674.5	6179	3441.8	5060.5	7965.5	7028.3	6597.4	4308.2	4634.4	3078	3189.8	3831.1	1847.9	3487.6	1711.9	1758.2	5564.6	5706	7385.6	3914.1	3612.9	8893	2975	4078.9	4108.1	5127.6		0.806027	0.864373	1.43923	0.515737	0.729565	0.870986
584	584	3292	Q91VJ5	Polyglutamine-binding protein 1 OS=Mus musculus OX=10090 GN=Pqbp1 PE=1 SV=1	Pqbp1	30.6	6.23	7327	49	283	12	0	9225.6	6412.4	7321.2	8911.6	7729.8	7039.2	6070.6	5948	7450.8	6499.8	5970.5	5545.1	5874.8	7673.4	3787.3	8392	7257.5	7192.7	9077.6	8164.6	4663.2	4796	1251	7108.3	3935.1	7879.6	6106.1	6721.6	7917	6991		1.13006	1.00585	1.11939	1.06257	1.07557	1.07869
585	585	512	Q99NB8	Ubiquilin-4 OS=Mus musculus OX=10090 GN=Ubqln4 PE=1 SV=1	Ubqln4	63.5	5.03	6657	27	249	11	0	3437.8	3237.9	3693.1	1140	2879.8	2821.4	2709.7	1793.4	1062.6	2228.6	2631.5	1889.1	1828.2	1202.2	1572	3987.7	3466.6	3519.9	1226.9	2493.3	1603.1	2492.5	460.6	1016.4	1282.9	3195.5	2303	2865.3	1146.2	2413.5	Acetyl [N-Term]	1.59769	0.84991	1.13259	1.07867	1.08297	1.14837
586	586	2903	Q3U1F9	Phosphoprotein associated with glycosphingolipid-enriched microdomains 1 OS=Mus musculus OX=10090 GN=Pag1 PE=1 SV=2	Pag1	46.5	4.81	1533	38	69	11	0	105.3	170.1	281.2	242.1	251.8	110.4	195.5	264.4	205.6	271.4	139	260.4	300.4	301.6	209.6	131.1	193.8	356.5	267.9	274.1	144.3	234	262.2	253.2	258.5	105.5	175.2	299.5	211.7	232.3		1.13275	0.896164	0.955616	1.02967	0.855932	0.974027
587	587	3750	Q9CU62	Structural maintenance of chromosomes protein 1A OS=Mus musculus OX=10090 GN=Smc1a PE=1 SV=4	Smc1a	143.1	7.64	594	21	54	25	0	58.4		136.6		162.8	68.2		153.8		190.5	81.7		177		192.2	72.5		141.1		117.1	77.9		555.5		203.1	64.3		117.8		164.8		0.76593	NA	0.942815	NA	0.865092	0.857946
588	588	1236	Q9CR98	Protein FAM136A OS=Mus musculus OX=10090 GN=Fam136a PE=1 SV=1	Fam136a	15.7	7.61	5993	78	295	11	0	10540.4	8420.1	7579.7	6028.8	6193.7	9149.8	7967.1	6208.5	6021.1	6103.4	8863.8	8003.7	7580.5	6703	3778.1	10360.8	9056.4	8051.5	6450.3	6722.3	4929.2	7202.3	1541	6080.6	4014	7778.4	7418	6228.9	5751.7	6502.5	Acetyl [N-Term]	1.00329	0.931079	0.850117	0.955257	1.06539	0.961026
589	589	4200	Q8JZX4	Splicing factor 45 OS=Mus musculus OX=10090 GN=Rbm17 PE=1 SV=1	Rbm17	45.3	5.82	2329	40	132	18	0	1255.6	1057.7	999.1	1120.5	1540.3	1405.1	1338.9	1256.1	1341.3	2384.6	1233.5	1363	1133.4	1292.5	1384.1	1477.4	1179.1	1359.2	1249.2	2040.7	1115.2	1469.1	861.6	1259.3	1531.1	1381	1065.1	997.7	933.3	1705.5	Acetyl [N-Term]	0.794284	0.795504	0.982848	0.695817	0.715214	0.796734
590	590	251	P10605	Cathepsin B OS=Mus musculus OX=10090 GN=Ctsb PE=1 SV=2	Ctsb	37.3	5.91	5376	37	201	10	0	1155.9	1514	1120	958.5	1407.9	1714.3	2347.3	1707	1316.5	2175.6	1653.7	2830.4	1566.2	1208.9	3341.6	1300.7	1363	1562.2	1052.7	1512.3	3191.5	2877.8	3486	1353.3	3656.9	1519.9	1732.1	1251.8	1117.2	1858.7		0.733333	0.737912	0.886601	0.848614	0.854339	0.81216
591	591	2337	P51150	Ras-related protein Rab-7a OS=Mus musculus OX=10090 GN=Rab7a PE=1 SV=2	Rab7a	23.5	6.7	2145	67	107	12	0	510.9	628	1093.1	624.9	349.4	768.1	820.9	1544.7	756.9	530.1	607.7	825.5	1389.9	574.5	971.6	642.3	477.1	1337.6	398.7	353	957.9	930.2	4705.6	841	1144.1	694.8	599.8	1398.7	681.1	521.6		0.905483	0.730661	0.90457	0.899855	0.983965	0.884907
592	592	3725	P46414	Cyclin-dependent kinase inhibitor 1B OS=Mus musculus OX=10090 GN=Cdkn1b PE=1 SV=2	Cdkn1b	22.2	7.02	5572	65	185	11	0	1746	1495.8	855.3	1361.8	2639.6	1807.8	1859.4	958.7	975	2146.2	1770.9	2187.5	852.6	1338.5	1994.5	1533.8	1561.2	901.3	1103.6	2376.2	3222.8	1720	481.7	1231.8	2432.7	2078.3	1951.9	1046.6	1058.1	2137.3		1.09169	1.04975	1.14963	1.08523	0.995853	1.07443
593	593	3217	O54988	STE20-like serine/threonine-protein kinase OS=Mus musculus OX=10090 GN=Slk PE=1 SV=2	Slk	141.4	5.14	991	22	73	19	0	27.7	176.1	498.6		185.6	24.4	223.6	522.8		214.7	22.2	218.6	544.6		170.1	27.3	167.4	533		214.9	25.1	197.7	510.6		179.5	31.3	168.1	474.1		185.5		0.906848	0.751789	1.28279	NA	0.863996	0.951355
594	594	3976	Q922D4	Serine/threonine-protein phosphatase 6 regulatory subunit 3 OS=Mus musculus OX=10090 GN=Ppp6r3 PE=1 SV=1	Ppp6r3	94.6	4.58	3644	18	171	16	0	1205.9	1400.5	1057.5	541.7	1180.8	1252.2	1375.6	1234.3	457.3	1241.5	1203.9	1438.4	1106.8	512	976.8	1269.2	1324.5	1230.2	503	1141.2	1317	1515	747.2	395.2	975.2	1405.7	1392.5	1269.9	438.1	1205.6		1.02884	1.01229	1.12258	0.958014	0.971083	1.01856
595	595	1949	Q8VC31	Coiled-coil domain-containing protein 9 OS=Mus musculus OX=10090 GN=Ccdc9 PE=1 SV=1	Ccdc9	61.4	5	5765	25	271	20	0	6749.7	5457.7	6247.7	2986	6319.9	5271.9	4777.9	4766.4	2269.8	4549.4	4310.2	3891.9	4300.8	2422.3	3086.8	6383.8	6189.9	5866.3	2978.3	6587.5	3243.7	3846.8	1385.9	2116.9	3193.7	4969.4	5065	5667.8	2508.6	4846.6	Acetyl [N-Term]	1.18912	1.06009	0.94262	1.10521	1.06533	1.07247
596	596	4408	Q6P9Q6	FK506-binding protein 15 OS=Mus musculus OX=10090 GN=Fkbp15 PE=1 SV=2	Fkbp15	132.9	5.07	2555	19	124	16	0	468.4	1197.8	229	343.5	336.8	604.3	1522.6	248.5	346	316.2	625.2	1805.4	255.3	405.4	295	508.4	1328.2	249.7	369	311.2	819.9	1700.6	239.9	328.7	319.4	592.8	1321.1	240.3	318.9	310.9		0.967002	0.867661	0.98097	0.921676	0.983238	0.944109
597	597	3197	Q80U78	Pumilio homolog 1 OS=Mus musculus OX=10090 GN=Pum1 PE=1 SV=2	Pum1	126.5	6.86	3793	15	147	14	0	1249.7	1231.5	1323	806.6	1377.7	1159.9	1289.7	949.9	753.7	1248.1	913.2	1185.1	889.5	702.9	532	1270.8	1558.7	1342.8	991.6	1246.7	636.7	1106.8	320.6	594.4	610.2	1309.4	1319.2	1353.5	764.5	1176.6	Acetyl [N-Term]	1.42489	1.02287	1.12889	1.01433	0.942713	1.10674
598	598	3023	Q9QY24	Z-DNA-binding protein 1 OS=Mus musculus OX=10090 GN=Zbp1 PE=1 SV=1	Zbp1	44.3	5.8	4063	49	147	12	0	799.8	618.9	747.6	368.8	611.3	1610.8	1186.2	1219.4	823.1	798.5	808.5	772.8	794.3	804.1	598.4	672.7	696.7	879.5	605.3	415.1	1348.5	883.8	959.8	796.4	583	1133.1	1137.8	1118.8	726.3	667.9	Acetyl [N-Term]	0.9175	0.959197	0.703439	0.882396	0.836443	0.859795
599	599	3291	Q99K28	ADP-ribosylation factor GTPase-activating protein 2 OS=Mus musculus OX=10090 GN=Arfgap2 PE=1 SV=1	Arfgap2	56.6	8.18	4737	34	245	18	0	4177.2	1830.6	2159.4	3846.9	3600.3	3873.7	2126.7	1815.1	2913.5	3142.5	2826.3	2082.8	1964.4	4147.1	2184	3755.3	2117.6	2284.3	3964.8	3279.3	3024	2160.2	906.9	3080.2	2348.2	4310.6	2139.8	2222.9	3017.7	3136		1.22467	1.00616	1.11279	1.03576	0.997932	1.07546
600	600	667	Q9D8B3	Charged multivesicular body protein 4b OS=Mus musculus OX=10090 GN=Chmp4b PE=1 SV=2	Chmp4b	24.9	4.82	6576	58	330	15	0	11726.3	11434	10671.5	17290.8	14465.3	11800.5	12569	10026.4	15136	10467.3	8227.5	10808.9	9310.3	15062.1	6316.7	11517.7	13728.8	10044.7	15411.5	12082.8	9481.9	10299.3	2753.9	14405.1	7206.2	11782.4	13790	12616.7	15041.8	10928.8		1.25835	1.09714	0.998466	0.993776	1.04409	1.07836
601	601	426	P97434	Myosin phosphatase Rho-interacting protein OS=Mus musculus OX=10090 GN=Mprip PE=1 SV=2	Mprip	116.3	6.21	680	26	69	22	0	198	169	114	306.2	364.9	210.4	227.4	170.9	324.4	557.8	187.2	250.1	167.8	325.4	362.1	205.1	177.4	149.4	331.2	406.8	258.4	221	326.7	247.2	487.8	218.5	201	166.1	307.8	446.9		0.971913	0.883905	1.0385	0.948829	0.801183	0.928866
602	602	4635	Q99N69	Leupaxin OS=Mus musculus OX=10090 GN=Lpxn PE=1 SV=2	Lpxn	43.5	6.43	2693	51	131	14	0	1121.3	666.8	665.6	868.7	1419.7	916.1	874.1	583.9	982.7	1619.6	1090.2	694.5	600.8	1403.2	1069.9	1033.3	739	725	1248.7	1514.4	1062.3	663.2	758.9	1332.7	1144.3	1126.9	745.5	617.6	1078	1438.9	Acetyl [N-Term]	1.05772	0.852877	1.23011	1.09698	0.888429	1.02522
603	603	3987	Q9D8I1	Marginal zone B- and B1-cell-specific protein OS=Mus musculus OX=10090 GN=Mzb1 PE=1 SV=2	Mzb1	20.6	6.02	10734	46	332	8	0	5845.9	3062.4	4505.3	6584.7	4753.9	7212.7	4078.2	5348.4	10912.1	5955.5	5197.8	2750.4	3512.5	8052.7	2913.3	5951.1	3548.9	5057.7	7325	3933.2	4718.5	2376.2	942.5	9200.8	2939	5575.3	3784.6	6450	10134.5	6434.9		1.20597	0.928007	0.772984	0.92874	1.0805	0.983239
604	604	1423	Q60902	Epidermal growth factor receptor substrate 15-like 1 OS=Mus musculus OX=10090 GN=Eps15l1 PE=1 SV=3	Eps15l1	99.2	5.02	1008	29	80	18	0	156.6	67.3	155.7		189.5	149.2	62.1	183.6		215.1	156.6	85.4	192.1		147.4	149.4	66.2	184.3		108.8	186	70.6	196.9		239.8	198.9	81.6	171.2		212.9	Acetyl [N-Term]	0.932462	1.31401	1.33311	NA	0.989772	1.14234
605	605	1645	P43275	Histone H1.1 OS=Mus musculus OX=10090 GN=Hist1h1a PE=1 SV=2	Hist1h1a	21.8	10.93	5079	39	248	12	0	2969.4	6251.4	10481.8	6176.6	3503.4	3188.4	4641.1	9438.9	7133.9	5202.1	3718.5	4552	8587.1	6265.7	4834.3	4441.5	4417.4	10061.3	6533.1	3596.4	3099.1	5882.5	8935.6	6250.7	4573.9	3361.4	4838.5	8221.5	6902.4	5532.1	Acetyl [N-Term]	0.871023	1.04253	1.05426	0.967549	1.06344	0.99976
606	606	733	Q9Z2U0	Proteasome subunit alpha type-7 OS=Mus musculus OX=10090 GN=Psma7 PE=1 SV=1	Psma7	27.8	8.46	2069	53	100	13	0	505.5	107.4	748.1	187.3	197.4	1131.9	119.6	873.1	180.2	276.6	2138.1	165.6	1031.7	208.2	851.9	909.6	114.6	858.6	295.1	218	2668.4	190.8	4776.9	265.4	875.7	914.5	115	870.5	143.7	207.1		0.997022	0.961538	0.807934	0.797447	0.748735	0.862535
607	607	3210	Q9EST3	Eukaryotic translation initiation factor 4E transporter OS=Mus musculus OX=10090 GN=Eif4enif1 PE=1 SV=2	Eif4enif1	107.9	7.74	1488	26	129	19	0	1340.4	1688.8	913.5	1649.5	668.1	1104.1	1669.3	731.9	1437.7	529.1	901.7	1783.1	754.2	1659.3	350.9	1148.2	1966.6	898.4	1744.2	605.6	641.8	1586.1	612.9	1449.7	386.6	1439.6	1786.6	1030.1	1585.3	579.3		1.40743	1.07027	1.30387	1.10266	1.09488	1.19582
608	608	583	P35700	Peroxiredoxin-1 OS=Mus musculus OX=10090 GN=Prdx1 PE=1 SV=1	Prdx1	22.2	8.12	5821	63	290	14	2	3416.2	3240.5	3650	2391	2540.3	5958.3	3430	6190	3118.6	4538.5	10447	5278	8426.9	4246.4	16608.4	4497.8	1902	4120.5	2937.3	2652.5	14833.8	6110.3	23438.5	4686.4	17039.1	4888.5	2574.3	3563.7	2501.4	3969.7		0.575719	0.750525	0.820452	0.802091	0.874672	0.764692
609	609	582	P56212	cAMP-regulated phosphoprotein 19 OS=Mus musculus OX=10090 GN=Arpp19 PE=1 SV=2	Arpp19	12.3	9.09	6332	82	405	11	0	11494.1	10572.3	11272.5	8866.5	13340.8	8810.8	9475.7	6871.8	6573.8	9238.3	6978	6780	6929	6660.7	4917.7	11581.5	13873.6	10207.9	9285	12304.6	5510.9	7863.9	1636.9	5059.1	4618.5	9815.4	9949.1	10702.5	7221.3	10230.3	Acetyl [N-Term]	1.55745	1.04996	1.11402	1.0985	1.10738	1.18546
610	610	3661	Q9D9K3	Cell death regulator Aven OS=Mus musculus OX=10090 GN=Aven PE=1 SV=2	Aven	37.2	4.98	3854	58	188	17	0	3022.5	1360.5	1568.5	1707.3	1919.4	2172.5	1046.7	1357.8	1345.3	1571.6	1807.6	1005.1	1346.6	1450.1	751.6	2446.7	1406.5	1516.1	1752.4	2133.4	845	1074.4	241.7	1242.2	753.1	2353.3	1212.4	1430	1522.5	1667.9		1.05317	1.15831	1.08322	1.13172	1.06128	1.09754
611	611	4023	Q3UDK1	TRAF-type zinc finger domain-containing protein 1 OS=Mus musculus OX=10090 GN=Trafd1 PE=1 SV=1	Trafd1	64.2	5.48	2432	43	132	17	0	530.6	1276.3	645.3	535.6	1211.9	653.3	1650.8	716.2	714.4	1203.8	480.7	1451.8	613.4	740.6	835.6	521.3	1106.5	661.3	565.3	1004	474.3	1333.5	330.8	675.2	919.3	562.3	1698	729.4	687.8	1225.4		1.01843	1.02859	0.860707	0.962766	1.01794	0.977688
612	612	2880	Q9Z1F9	SUMO-activating enzyme subunit 2 OS=Mus musculus OX=10090 GN=Uba2 PE=1 SV=1	Uba2	70.5	5.24	1024	36	77	18	0	766.2	623	962.8	493.6	379	919.8	731.8	852.6	371.9	400.3	1047.5	916.1	1171.9	413.1	594.8	788.4	616	927	441.9	380.9	1024.3	1087.2	1477.1	361.8	461.6	765	624.8	641.6	388.9	416.8		0.752522	0.853785	0.831703	1.04571	1.04122	0.904988
613	613	903	Q5U5Q9	BRCA1-A complex subunit RAP80 OS=Mus musculus OX=10090 GN=Uimc1 PE=1 SV=2	Uimc1	81.4	6.51	1505	27	121	18	0	785.7	879.9	562.9	192.2	930.3	721.8	758.6	553.8	187.4	879.1	692.9	844.6	540.8	209.8	781	711.9	691.8	543.3	144.6	795.8	614.7	842.6	293.4	182.3	815.9	745.6	773.1	586.1	168.8	960.4		1.05832	1.01911	1.03297	0.900747	1.09248	1.02073
614	614	3178	Q80TY0	Formin-binding protein 1 OS=Mus musculus OX=10090 GN=Fnbp1 PE=1 SV=2	Fnbp1	71.3	5.67	2318	29	110	14	0	295.7	137.1	221.6	112.6	174.2	311.6	222	446.5	199.2	278.1	321.2	288.9	342.3	236.3	303.7	250.5	185.8	609.8	147.1	204.8	498.8	261.9	627	212	352.5	334.2	225.7	391.9	155.6	246.7	Acetyl [N-Term]	0.877716	1.01667	1.07253	0.781124	0.887091	0.927025
615	615	2817	Q91WK0	Leucine-rich repeat flightless-interacting protein 2 OS=Mus musculus OX=10090 GN=Lrrfip2 PE=1 SV=1	Lrrfip2	47.1	5.68	3844	33	182	16	0	1541.4	1899.3	1163.9	1240.1	2140	1454.4	1793.5	1060.5	968.3	2021	1269.3	1966.7	1030.2	1120	1451.6	1513.7	1891.7	1184.6	1224.2	1974.7	1539.6	1943.5	567.1	962.1	1562.4	1554.1	2004.5	1307.3	967.5	1915.6		1.23272	1.11765	1.06855	0.999174	0.947848	1.07319
616	616	1897	Q14B71	Cell division cycle-associated protein 2 OS=Mus musculus OX=10090 GN=Cdca2 PE=1 SV=2	Cdca2	106.3	8.65	832	37	73	20	0	234.9		158.1	94	123.5	253.2		141.2	98	136.9	187.5		167.4	104.6	85.2	243.6		175.6	88.7	144.1	43.8		23.8	45.6	102.4	285.4		180.6	105.7	154.3		1.27904	NA	1.12717	1.07857	1.1271	1.15297
617	617	2553	O35326	Serine/arginine-rich splicing factor 5 OS=Mus musculus OX=10090 GN=Srsf5 PE=1 SV=2	Srsf5	30.9	11.56	5678	33	283	12	0	13055.6	10911.7	11576.6	8799.5	10014.6	10367.3	9929.1	9001	6771.9	7657.5	7414.3	8025.1	8253	6061.9	4790.6	12654.3	11923.8	10903.2	8971.1	11263.2	3349.2	8107.3	1903.6	6330.9	4183.3	9745.2	9482.5	10833.5	7334.5	8863.8		1.20359	0.955021	0.939994	1.08308	1.15753	1.06784
618	618	104	Q922R8	Protein disulfide-isomerase A6 OS=Mus musculus OX=10090 GN=Pdia6 PE=1 SV=3	Pdia6	48.1	5.14	3097	46	146	16	0	1006.3	526.3	1046.6	254.3	502.1	1516.2	526.2	1447.1	232.3	757.7	2159.6	721.6	1727.9	197.4	1718.7	1160.5	322.7	1221.4	252.6	586.4	2126.8	918.3	6154.9	247.9	1781.7	1426.2	392.3	1082.6	170.8	629.1		0.748117	0.745534	0.940641	0.735256	0.830276	0.799965
619	619	3099	P70333	Heterogeneous nuclear ribonucleoprotein H2 OS=Mus musculus OX=10090 GN=Hnrnph2 PE=1 SV=1	Hnrnph2	49.2	6.3	2760	33	135	10	0	14.2		11.1	16		13.7		11.7	55.3		17.5		13.7	27.3		6.7		5.7	23.5		20.5		25.7	31.2		23.2		12.8	35.5			1.09402	NA	1.69343	0.641953	NA	1.14313
620	620	1429	Q9CR00	26S proteasome non-ATPase regulatory subunit 9 OS=Mus musculus OX=10090 GN=Psmd9 PE=1 SV=1	Psmd9	24.7	6.43	5170	43	224	9	0	6843.6	4410.4	6340.5	10507.6	8380.6	4591.5	4059	5036.5	5982.7	4971.7	3358.7	2886.2	4517.7	4779.4	2510.2	6456.8	4593.3	5621.5	9500.5	7625.9	3075.8	2772.2	3052.2	4713.9	2597.6	5890.2	4278.6	6180.6	6803.3	5375	Acetyl [N-Term]	1.22716	1.0541	1.28285	1.13716	1.08112	1.15648
621	621	1537	P17225	Polypyrimidine tract-binding protein 1 OS=Mus musculus OX=10090 GN=Ptbp1 PE=1 SV=2	Ptbp1	56.4	8.34	4316	26	224	11	2	1406.1	2478.5	2325.4	2311.7	1427.4	1557.2	2997.6	3110.9	3221.1	2720.4	1720.3	3310.7	2793.4	2936.5	2348.8	1509	2290.9	3243.4	2472.9	2201.9	1564.2	3575.5	4804.9	2787.1	2409.3	1604.9	2436.7	2351.4	2183.5	1911	Acetyl [N-Term]	0.755858	0.812884	1.03063	0.677874	0.70247	0.795944
622	622	4321	Q80U93	Nuclear pore complex protein Nup214 OS=Mus musculus OX=10090 GN=Nup214 PE=1 SV=2	Nup214	212.8	7.08	2001	12	114	16	0	2398.9	2014.8	1168.2	2022.2	2158	1866.4	2299.5	858.5	1715.9	1895.1	1565.7	2105.2	866.7	1641.2	995.3	2212.6	2752.5	1316.5	2675.6	2361.4	1074.3	1894.6	358.1	1618.9	1093.7	2189.5	2149.2	1116.4	1775.7	1806.8		1.30041	0.934638	1.17311	1.03485	0.953406	1.07928
623	623	4447	O70133	ATP-dependent RNA helicase A OS=Mus musculus OX=10090 GN=Dhx9 PE=1 SV=2	Dhx9	149.4	6.83	1238	18	66	17	0	16.3		712.1		4.9	26.7		1105.8		20.9	70.1		1197.2		121.3	34.2		831.7		5.2	70		3265.2		124.6	31.3		760.9		6.4		0.688099	NA	1.17228	NA	0.30622	0.722201
624	624	3558	Q80W00	Serine/threonine-protein phosphatase 1 regulatory subunit 10 OS=Mus musculus OX=10090 GN=Ppp1r10 PE=1 SV=1	Ppp1r10	94.3	9.16	1129	28	104	21	0	452.7	393.7	427.7	16.7	312.3	534.9	458.2	444.1	23.8	383.2	700.6	387.1	456.5	25.2	346.7	522.9	440.8	498.5	22.2	311.1	432.7	498.5	233.5	49.9	310.5	571.5	458.5	416.9	27.8	392.3		0.938753	1.00065	1.06842	1.16807	1.02375	1.03993
625	625	3109	Q9WV69	Dematin OS=Mus musculus OX=10090 GN=Dmtn PE=1 SV=1	Dmtn	45.4	8.41	4780	49	286	18	0	3955.3	3344.6	3198.2	4027.6	6225.8	3201.8	2500.6	2534.7	2134.7	3231.1	2477	2320.3	2192.5	2290.6	2502.4	3408	3399.2	2590.6	2648.6	4741.8	2441	2353.8	665.8	1765	2299.2	4860.8	3964.5	3912.8	2931.3	4234.9		1.54369	1.58542	1.51815	1.37317	1.31067	1.46622
626	626	3759	P47754	F-actin-capping protein subunit alpha-2 OS=Mus musculus OX=10090 GN=Capza2 PE=1 SV=3	Capza2	32.9	5.85	2693	59	118	12	2	279.2	304.8	398.9	149.6	261.2	504.5	423.8	610.2	199.4	435.3	865	671.2	727.1	174.6	1203.5	336.8	313.1	524	120.9	244.3	1449	782.3	3753.8	338.4	1372	351.8	300.3	382.5	141.2	356.7	Acetyl [N-Term]	0.626844	0.708589	0.697324	0.708124	0.819435	0.712063
627	627	3147	Q80UG5	Septin-9 OS=Mus musculus OX=10090 GN=Sept9 PE=1 SV=1	Sept9	65.5	8.9	2424	40	150	22	0	1920.4	1114.3	970.7	2569	1481.8	2307.3	1440.6	1159.3	2190.5	1621.6	1585.7	1374.2	1102.5	2334.1	1311.8	2140.3	1122.6	1176.8	2366.9	1271.6	2770.4	1269.6	1222.2	2145.3	1483.7	2127.1	1381.8	1079.5	2215	1439.1		0.931165	0.959184	0.9219	1.01118	0.887457	0.942178
628	628	1494	Q3THK3	General transcription factor IIF subunit 1 OS=Mus musculus OX=10090 GN=Gtf2f1 PE=1 SV=2	Gtf2f1	57.2	7.01	4353	33	165	16	0	1688.2	1382.4	1226.5	375.9	1122.3	1380.2	1547.9	1386.7	485.9	1196.4	1092.3	993.5	1227	318.9	631.2	1874.2	1364.9	1242.9	397.2	1390.2	830.8	1217	619	421.4	692	1478.3	1542.6	1409.4	426.7	1041.9	Acetyl [N-Term]	1.01637	0.996576	1.07108	0.878164	0.870863	0.96661
629	629	619	Q6P4T2	U5 small nuclear ribonucleoprotein 200 kDa helicase OS=Mus musculus OX=10090 GN=Snrnp200 PE=1 SV=1	Snrnp200	244.4	6.06	1128	11	98	19	0	240.7	38.1	348.1	115.9	143.1	242.9	36	434	121.7	224.3	232.3	43.4	403.2	134.7	280.5	197.9	23.6	393.5	107.5	179.9	214.3	35	924.5	108.3	295.2	258.7	22.2	415.3	205.5	197.4		0.956912	0.616667	1.06505	1.68858	0.880071	1.04146
630	630	2258	Q8BFR5	Elongation factor Tu, mitochondrial OS=Mus musculus OX=10090 GN=Tufm PE=1 SV=1	Tufm	49.5	7.56	1844	47	91	18	0	363.7	259	561.5	85.9	241.6	579.7	304.4	716.6	122	349.6	948.5	493.7	879.8	127.4	939.1	478.8	197.6	613.3	68.2	208.8	1063.7	541.9	2659.6	148.3	997.3	419	223.7	491.8	97	306.2		0.686296	0.734888	0.722788	0.795082	0.875858	0.762982
631	631	3712	Q3TXS7	26S proteasome non-ATPase regulatory subunit 1 OS=Mus musculus OX=10090 GN=Psmd1 PE=1 SV=1	Psmd1	105.7	5.39	1488	28	96	20	0	125.2	273.4	429.9	84.9	312.6	233.7	369.9	729.9	171.7	649.8	406.5	336.6	843.4	97.1	1190.6	173.1	296.7	525.9	97.1	619.7	410.1	406.3	1751.1	212.3	1155.8	159.4	278.9	353.8	88.9	389.9		0.484724	0.753988	0.682071	0.517764	0.600031	0.607715
632	632	828	P13597	Intercellular adhesion molecule 1 OS=Mus musculus OX=10090 GN=Icam1 PE=1 SV=1	Icam1	58.8	6.13	3704	23	226	13	0	1947.9	2021.8	3262.1	2682.8	1653.5	3528.6	2844.7	4168.1	3784.4	2722.6	4299.8	3727.8	4082.2	4469.6	3808	2087.5	1901.4	4011.2	2561.4	1375.6	4547.9	3444.6	3217.8	5221.2	3780.3	2622.7	2342.1	3308.4	3442.1	2637.3		0.793743	0.823321	0.743269	0.90955	0.96867	0.84771
633	633	4186	Q78ZA7	Nucleosome assembly protein 1-like 4 OS=Mus musculus OX=10090 GN=Nap1l4 PE=1 SV=1	Nap1l4	42.7	4.67	2528	49	121	12	0	335	91.9	504.8		90.9	423.9	85.8	1073.4		124.3	522.6	183.2	1611.8		406.4	316.9	72.1	507		82.7	485.9	137.6	2375		319.4	461.1	77.4	578.5		104.3	Acetyl [N-Term]	0.538942	0.902098	1.08776	NA	0.839099	0.841974
634	634	659	Q9R1K9	Centrin-2 OS=Mus musculus OX=10090 GN=Cetn2 PE=1 SV=1	Cetn2	19.8	5	3005	70	191	12	0	5197	3615.3	3247.1	3221	3510.1	4975.5	3764.1	3629.8	3378.9	3560.2	4510.3	3852	3927.1	3766.9	2412.3	4889.6	4062.7	3504.6	3141.2	3487.7	3387.6	3463.1	866.2	3306.6	2596	4341.4	3842.5	3356.4	3211.3	3822.1		0.924679	1.02083	0.872556	0.950398	1.07356	0.968405
635	635	2092	Q9DBU6	Serine/Arginine-related protein 53 OS=Mus musculus OX=10090 GN=Rsrc1 PE=1 SV=1	Rsrc1	38.6	11.15	1831	39	104	13	0	1086.3	1076.3	552	328.8	919.6	786.7	747.9	606.5	238.1	758.1	524.9	691.6	527.7	276.2	460.2	949.2	1164.2	465.1	300.1	747.3	181.5	737.5	115.8	167.3	549.1	864.6	854.5	554.4	304.8	933		0.914097	1.14253	1.09902	1.28013	1.23071	1.1333
636	636	2409	Q6PIU9	Uncharacterized protein FLJ45252 homolog OS=Mus musculus OX=10090 PE=1 SV=2	Q6PIU9	37.7	5.07	4661	51	163	10	0	1247.3	815.9	800	1577.5	944.1	1467.7	1042.8	950.4	1627	1139.1	1413.4	1413.2	1060.7	2256	1050.5	1189.1	884.4	946.4	1702.5	937.7	2277	1144.8	643.2	1933.6	1263.3	1582.1	1014.5	1030.5	1640.6	1004.3		1.08428	0.972862	1.07795	1.00836	0.881661	1.00502
637	637	3341	Q8CGP0	Histone H2B type 3-B OS=Mus musculus OX=10090 GN=Hist3h2bb PE=1 SV=3	Hist3h2bb	13.9	10.32	20492	53	1137	9	0	789.8	261.7	271.6		55.3	659.3	236.5	209.9		62.7	929.9	261.4	149.3		37	925	175.8	234.4		48.1	486.4	302.8	284		41.1	620.5	239.6	220.2		53		1.04907	1.01311	0.94115	NA	0.845295	0.962156
638	638	1997	P06537	Glucocorticoid receptor OS=Mus musculus OX=10090 GN=Nr3c1 PE=1 SV=1	Nr3c1	86	6.35	2256	25	128	13	0	870.9	749.9	511.9	1133.9	1957.6	1370.1	1110.1	580.5	1359.7	2123.6	1202.7	1503.8	629.6	1398.2	1492	908.5	891.5	564	996.1	1612.4	1721.9	1217.9	399	1277.4	1616.2	1101.2	1192.8	679.1	1283.2	2042.4		1.16985	1.0745	0.803737	0.943738	0.961763	0.990718
639	639	968	Q6P542	ATP-binding cassette sub-family F member 1 OS=Mus musculus OX=10090 GN=Abcf1 PE=1 SV=1	Abcf1	94.9	6.51	2182	15	137	15	0	2068.2	1098.5	1210.9	768.6	2592.9	2207.4	1307.6	1372.3	835.6	2837.5	2048.2	1294.4	1267.7	711.9	1956	2140.1	1135	1389.2	795.4	2523.1	1734	1401.9	842	802.6	1912.8	2392.8	1292.9	1282.7	761.5	2565.1		0.934708	0.988758	1.08399	0.911321	0.904	0.964556
640	640	153	F7BJB9	MORC family CW-type zinc finger protein 3 OS=Mus musculus OX=10090 GN=Morc3 PE=1 SV=1	Morc3	106.5	5.68	3497	21	112	13	0	374.2	387.9	403	396.5	317.3	482.5	489.3	349.6	488.3	352	437.4	488.7	386.9	599.2	242.8	482.9	493.9	435.5	441.4	300.7	482.7	478.3	540.9	539.8	259.3	470.3	472.3	437	422	328.1		1.25	0.965256	0.974715	0.864223	0.932102	0.997259
641	641	2602	Q62167	ATP-dependent RNA helicase DDX3X OS=Mus musculus OX=10090 GN=Ddx3x PE=1 SV=3	Ddx3x	73.1	7.18	4021	32	177	19	9	1795.6	2628.7	1419.3	1654.1	2314.7	1787	2886.4	1437.3	1930	3031.4	1514.9	3301.6	1423.1	1650.3	1399.7	1664	2016.9	1472.8	1545.5	2428.5	1158.4	3172.6	1347.1	1511.6	1455.3	2078.9	3021.9	1565	1818.1	3111.6	Acetyl [N-Term]	1.08885	1.04694	1.16335	0.942021	1.02646	1.05352
642	642	3771	P18608	Non-histone chromosomal protein HMG-14 OS=Mus musculus OX=10090 GN=Hmgn1 PE=1 SV=2	Hmgn1	10.1	9.76	3544	75	205	12	0	7996.3	7712.9	7314.7	9526.8	8264	7999.6	9129.1	10329	10703.6	9195.3	8635.8	10306.1	10090.5	13295.3	6333.6	6131.6	7216.5	7741.1	10907.4	9734.9	7685.4	8370.8	2060.7	11047	8328	6814.2	9170.5	7747.6	10540.8	9382.4		0.750082	1.00453	0.851818	0.98479	1.02035	0.922314
643	643	2202	Q8VI36	Paxillin OS=Mus musculus OX=10090 GN=Pxn PE=1 SV=1	Pxn	64.4	6.02	2413	32	140	12	0	2029	737.8	1774.1	2144.1	2417.5	1635.7	856.4	1394.5	2023.4	2595.5	1507.6	842	1312	2653.9	1561.3	1852.9	806.7	2102.6	2687.2	2882.3	1925.5	780	1057.9	2126.5	2115.7	2267.3	787.7	1635.6	1960.8	2236.1	Acetyl [N-Term]	1.17289	0.91978	1.38613	0.969062	0.86153	1.06188
644	644	4178	P70460	Vasodilator-stimulated phosphoprotein OS=Mus musculus OX=10090 GN=Vasp PE=1 SV=4	Vasp	39.6	8.53	3133	34	180	13	0	2991.5	2228.3	2451	1924.6	4322.2	2905	2484.8	1941.7	1692.4	4125.4	2532.8	3428.6	2243.4	3328.7	4786.6	2914.4	2784.8	2642.8	2274.2	3455.9	4684.8	3035.5	3225.5	2228.6	5156.5	4440.7	2608.2	1976.8	1664.5	4216.4		1.01808	1.04966	1.52864	0.983515	1.02206	1.12039
645	645	832	Q93092	Transaldolase OS=Mus musculus OX=10090 GN=Taldo1 PE=1 SV=2	Taldo1	37.4	7.03	3612	32	200	13	0	817.6	837.5	1806.4	176.2	492.7	2202.5	1030.6	3151.1	247	1087.1	5142.4	2116.3	4078.2	197.6	8047.2	1525.7	427.7	2239.9	140.9	484.6	9413.2	2637.6	24834.5	563.5	8400.8	1506.2	678.5	1651	121.1	885.5		0.523944	0.658354	0.683859	0.490283	0.814552	0.634199
646	646	3528	P97311	DNA replication licensing factor MCM6 OS=Mus musculus OX=10090 GN=Mcm6 PE=1 SV=1	Mcm6	92.8	5.45	1451	27	75	19	0	241.7	48.8	832.7	472.5	104	237.2	54.6	880.6	500.6	100.6	303.5	48.1	978.6	540.3	226.7	317.4	49.1	860.7	573.7	88.6	188.9	70.2	1196.7	381.2	176	245	44.8	754.4	585.5	113.5		0.856689	0.820513	1.03288	1.1696	1.12823	1.00158
647	647	4429	P68037	Ubiquitin-conjugating enzyme E2 L3 OS=Mus musculus OX=10090 GN=Ube2l3 PE=1 SV=1	Ube2l3	17.9	8.51	3646	73	207	10	0	7359.8	4669.4	5495	5425.4	3605.2	4551.4	4336.5	3221.2	3002.2	2759.3	5557.7	3203.7	3279.8	3609	2164.4	6884.8	5219.2	5433.5	6119.8	4176.6	4028	3416.7	3707	3842.9	2096.7	5525.4	3836.7	3739.8	3464.7	2822.4		1.161	0.884746	1.214	1.15405	1.02287	1.08733
648	648	601	Q5SSZ5	Tensin-3 OS=Mus musculus OX=10090 GN=Tns3 PE=1 SV=1	Tns3	155.5	6.65	954	19	82	19	0	1139.6	234.7	203.5	498.6	415.6	1130.6	312.6	241.5	449.3	402.8	983.6	373.1	215.5	605.7	365.9	1048.5	245.7	237.4	505.5	293.4	1552.2	350.4	355.7	512	454.5	1231.1	278.1	253	463.2	367.7		1.04762	0.889635	1.08889	1.03094	0.91286	0.993988
649	649	4512	Q9R1P4	Proteasome subunit alpha type-1 OS=Mus musculus OX=10090 GN=Psma1 PE=1 SV=1	Psma1	29.5	6.46	1279	52	78	14	0	128.8	346.2	340.2	38	212.7	181.3	287.4	356.6	29.1	247	243.6	335.1	441.3	23.6	746.2	178	262.5	389.4	26.4	230.6	300.2	531.6	1794.9	29.7	678.9	191.8	246.3	419.1	9.7	218.6		1.17527	0.856994	1.05792	0.333333	0.88502	0.861706
650	650	2061	Q9Z1Q5	Chloride intracellular channel protein 1 OS=Mus musculus OX=10090 GN=Clic1 PE=1 SV=3	Clic1	27	5.17	4066	66	157	11	0	243.9	486.3	656.5	181.5	168	600.3	487.9	986.5	248.3	344.9	1275.9	790.6	1238.7	243.6	2358.6	395	455.1	715.3	112.5	171.8	1930.7	866.2	6695.9	483.9	2316.7	445.1	398.3	541	131.8	305	Acetyl [N-Term]	0.548403	0.816356	0.741463	0.53081	0.884314	0.704269
651	651	2904	P34022	Ran-specific GTPase-activating protein OS=Mus musculus OX=10090 GN=Ranbp1 PE=1 SV=2	Ranbp1	23.6	5.22	5624	71	388	13	0	7361.7	5671.9	5959.2	12262.6	7048.6	6381.9	5405.6	8648.4	12582.9	6738.6	4812.8	4874.1	9548.3	10206.4	4547.6	6464.4	5788.6	6387.4	11925.2	6723.2	3362.2	4326.8	2203.2	9533.2	4983.1	5503.3	6053.2	7919.7	12590	7503.8		0.915742	1.1198	0.862329	1.00056	1.11355	1.0024
652	652	562	P14206	40S ribosomal protein SA OS=Mus musculus OX=10090 GN=Rpsa PE=1 SV=4	Rpsa	32.8	4.87	3389	45	149	11	0	465.1	547.9	1050.7	129.8	567.6	1107.3	495.4	1130.3	128.9	823.7	2301.7	730.6	1467.9	110.3	2632.8	1059.4	233.3	1234	89.7	593.8	1758	1268.9	3882	236.3	2252.6	991.3	355	625.5	97.5	696.8	Acetyl [N-Term]	0.553393	0.716593	0.895241	0.7564	0.845939	0.753513
653	653	4593	Q8K310	Matrin-3 OS=Mus musculus OX=10090 GN=Matr3 PE=1 SV=1	Matr3	94.6	6.25	2254	22	166	17	0	564.7	786.6	762.6	705.7	715.8	660.6	849.6	1253.5	1551.7	1726.9	690	923.2	936	694.6	977.2	635.2	770.4	953.6	851.7	1365.5	578.6	865	1672.7	1142.3	1259.1	837	779.4	984	966	1143.7		0.785002	0.917373	1.26703	0.622543	0.662285	0.850847
654	654	759	Q9CYI4	Putative RNA-binding protein Luc7-like 1 OS=Mus musculus OX=10090 GN=Luc7l PE=1 SV=2	Luc7l	43.9	9.88	2415	34	130	12	0	513	413.5	276.6	261.4	623.9	691.3	455.1	476.1	397	687.2	638.7	619.2	452.9	388.9	646.3	517.7	281.4	310.4	209.8	759.2	488.7	539.6	133	423.9	650.1	551	501.3	365	354.7	655.2		0.766646	1.10152	0.797049	0.893451	0.953434	0.902419
655	655	3901	P51885	Lumican OS=Mus musculus OX=10090 GN=Lum PE=1 SV=2	Lum	38.2	6.43	3161	38	190	11	0	1825.8	2846.5	1353.3	1367.9	1324.1	3732.3	4557.5	3090.3	2405.5	2982.9	5503.1	10001.2	3863.2	4298.3	6990.2	1929.2	2143	2035.6	1004	931	13075.4	8670.7	4170.9	5436.6	5693.9	2518.8	5625.4	2214.6	2175.5	2692.1		0.716629	1.23432	0.674865	0.904386	0.902511	0.886542
656	656	774	Q9R0G7	Zinc finger E-box-binding homeobox 2 OS=Mus musculus OX=10090 GN=Zeb2 PE=1 SV=2	Zeb2	136.5	6.34	1134	18	83	17	0	607.1	96	269.5	319.7	177.4	593.3	135.2	273.1	300.9	210.7	455.6	133.5	289.1	383.8	142.7	479.7	109	285.1	297.1	173.3	316	115.6	124.4	266.6	166.2	544.6	146.8	265.3	356.9	196.6		0.971439	1.0858	0.917917	1.18611	0.93308	1.01887
657	657	123	Q9CX60	Protein LBH OS=Mus musculus OX=10090 GN=Lbh PE=1 SV=1	Lbh	12.1	4.31	5277	75	188	9	0	1344.7	1552.4	1567.5	1214.8	2209.4	1179.5	1641.9	1353.4	1196.9	2288.5	1129.8	2113.2	1383.6	1584.8	2016.4	1043.5	2031.5	1493.6	1274.6	2140.6	1536.6	1536.5	475	1345.8	2273	1085	1731.9	1527.6	1148.2	2356.8	Acetyl [N-Term]	1.12871	1.05481	0.919881	0.959312	1.02984	1.01851
658	658	3213	Q01149	Collagen alpha-2(I) chain OS=Mus musculus OX=10090 GN=Col1a2 PE=1 SV=2	Col1a2	129.5	9.19	5319	16	192	17	0	2451.4	2775.8	1980.3	5774.8	1941.8	3012.7	3454.7	1803.7	5991.5	4059.4	2558.7	4553.1	1707	6005	2667.4	2686.7	3782.8	3690.2	6236.5	2936.4	4969	4655.2	811.6	6184.8	1325.6	3920.7	4641.7	3995.7	4874.8	2776.1		2.21528	1.34359	1.30139	0.813619	0.68387	1.27155
659	659	3943	Q6ZQ38	Cullin-associated NEDD8-dissociated protein 1 OS=Mus musculus OX=10090 GN=Cand1 PE=1 SV=2	Cand1	136.2	5.78	831	19	60	19	0	127.9	93.6	553.2		38.8	113.1	81.1	633.7		25.7	113.8	109.3	677.5		86.3	131.7	52.8	591.9		33.9	125.3	152.9	2859.5		56.7	117.8	69.6	506.5		37.4	Acetyl [N-Term]	0.799274	0.8582	1.04156	NA	1.45525	1.03857
660	660	20	P01901	H-2 class I histocompatibility antigen, K-B alpha chain OS=Mus musculus OX=10090 GN=H2-K1 PE=1 SV=1	H2-K1	41.3	6.39	4045	44	165	12	4	1120.1	916	1984.7	284.9	614	1886.9	1313.5	2862.9	530.5	875.9	2121.8	1690	2917.2	500.9	1378.1	1137.3	573.4	2757.2	266.2	500	2685.6	1841.6	5914.9	758.3	1409.7	1675	925.4	2559.1	457.9	828.5		0.893884	0.70453	0.887699	0.863148	0.945884	0.859029
661	661	935	P13634	Carbonic anhydrase 1 OS=Mus musculus OX=10090 GN=Ca1 PE=1 SV=4	Ca1	28.3	6.96	2902	70	122	12	0	625.6	924.7	1199	1243.2	1225.3	750.5	1011.8	1256.5	736.1	990	952.6	1101	1219.7	596.1	2517.1	950.5	569.7	1084.1	671.5	1067.1	1054.7	1283.7	3270.1	780.1	1903.1	861	776.8	849.7	713.1	1001.8	Acetyl [N-Term]	0.676244	0.767741	1.14724	0.968754	1.01192	0.914379
662	662	821	P31786	Acyl-CoA-binding protein OS=Mus musculus OX=10090 GN=Dbi PE=1 SV=2	Dbi	10	8.82	6107	82	425	10	0	12517.7	6596.9	10422.8	13336.2	9862.4	12800.6	8753.1	14642.8	13859.3	11723.5	9103.8	11378.8	13004.6	16178.8	6875.2	7895.9	7298.8	10376.3	13271.8	11200.1	9879.2	7315	3021	12872	8767.2	11345.6	8650.2	12010	13703	11706.5	Acetyl [N-Term]	0.820198	0.988244	0.886333	0.988722	0.99855	0.93641
663	663	3410	Q91WE2	Protein FAM192A OS=Mus musculus OX=10090 GN=Fam192a PE=1 SV=1	Fam192a	28.7	5.14	6686	52	364	21	0	14753.1	7763.4	6448.6	11835.7	7796.7	10946.9	7209.9	4855.9	8208.2	5700.6	9094.1	5603	4656.4	8630.1	3175.3	13115.7	9347.7	6212.5	11334	7855.1	5651.8	6110.1	1524.6	7239.4	3216.3	11933.4	7045.5	6049.1	8863.4	6099.5	Acetyl [N-Term]	1.24572	0.977198	1.09012	1.07982	1.06998	1.09257
664	664	4674	Q921M3	Splicing factor 3B subunit 3 OS=Mus musculus OX=10090 GN=Sf3b3 PE=1 SV=1	Sf3b3	135.5	5.26	944	19	90	19	0	315.2	46.1	372.3	27.4	304.9	448.2	41.2	534.8	40.3	421	754.6	84.8	778.7	38.9	1314.1	386.9	18.6	435.1	32.6	319.8	736.9	111.8	1731.1	41.2	1323	329.5	24.2	292.8	27.1	369.5		0.547494	0.587379	0.735163	0.672457	0.877672	0.684033
665	665	1300	P70271	PDZ and LIM domain protein 4 OS=Mus musculus OX=10090 GN=Pdlim4 PE=1 SV=3	Pdlim4	35.5	8.05	2960	50	144	15	0	1604.4	1722.5	996.2	1694.4	1300.2	1451.4	2181.5	1043.9	1807.4	1600.5	1304.8	1584.6	861.7	2052.3	1002.4	1498	1977.8	1185.3	2232.1	1613.1	1646.3	1595	908.6	2125.9	1131.8	1731.6	1762.6	961.2	1677.1	1351	Acetyl [N-Term]	0.920778	0.807976	1.19305	0.927907	0.844111	0.938766
666	666	3030	Q9ESX5	H/ACA ribonucleoprotein complex subunit 4 OS=Mus musculus OX=10090 GN=Dkc1 PE=1 SV=4	Dkc1	57.4	9.28	3010	28	115	11	0	331.8	308.1	386.8	126.5	425.7	399.8	460.3	425	284.3	1143.8	480.3	452.2	457	156.1	441.9	339.9	283	452.5	130.5	863.7	456.9	509.6	1089.8	235.1	573.1	482.3	410	347.2	176.2	864.1	Acetyl [N-Term]	0.816941	0.890723	1.20635	0.619768	0.755464	0.85785
667	667	1854	P14152	Malate dehydrogenase, cytoplasmic OS=Mus musculus OX=10090 GN=Mdh1 PE=1 SV=3	Mdh1	36.5	6.58	3919	40	181	13	0	581.3	756.3	1560.1	325.5	380	998.7	948.8	2076.4	407.7	758.1	2270.9	1630.4	2914.3	533.4	4604.4	658.2	646.7	1844.7	296.4	661.2	4168.4	2207.9	20490.6	809.5	4921.6	871.1	704.8	1413.2	338.8	665.9		0.680601	0.742833	0.872234	0.831003	0.87838	0.80101
668	668	1667	Q9QXT0	Protein canopy homolog 2 OS=Mus musculus OX=10090 GN=Cnpy2 PE=1 SV=1	Cnpy2	20.8	5.07	5689	55	218	10	0	4912.9	4040.3	3881	2562.4	2895.1	5411.5	4266	5007.1	5143.6	3705.9	4612.9	5614.6	4376.8	5182.5	3107.7	4413.5	2999.7	4690.7	2289	1953.2	4943.7	5070.4	1778.7	6252.6	3702.2	5119	4299.2	4799.3	4852.2	4029.3		0.958499	1.00778	0.945948	0.943347	1.08727	0.988569
669	669	1095	Q9QYC0	Alpha-adducin OS=Mus musculus OX=10090 GN=Add1 PE=1 SV=2	Add1	80.6	5.9	2512	29	134	18	0	921.6	1748.4	998.5	2972.6	2917.6	917.8	2097.4	1002.9	1899	2395.5	846.1	2428.3	983.2	2344.9	2073.7	804.2	2128.1	1063.9	2423	2821.6	1058.6	2183.3	756	1746.6	2140.3	1257.1	2298	1294.7	2121.4	2268.4		1.29096	1.09564	1.36969	1.11711	0.946942	1.16407
670	670	4261	P48428	Tubulin-specific chaperone A OS=Mus musculus OX=10090 GN=Tbca PE=1 SV=3	Tbca	12.8	5.27	4829	56	321	15	0	11413.9	10202.2	9025.5	15275.2	14326.7	10502.3	10995.7	8274.4	13130.4	12208.7	7798.9	9993.1	7802.8	13957	6768.2	10890.6	11881.8	8855	15356.9	14247	8505.1	9219.9	2484.2	12604.1	7314.1	11219.8	11539.9	9856.7	13483.3	12117.9		1.19123	1.04949	1.06832	1.02688	0.992563	1.0657
671	671	1863	Q8BQ47	Protein canopy homolog 4 OS=Mus musculus OX=10090 GN=Cnpy4 PE=1 SV=1	Cnpy4	28.1	4.77	4998	49	190	11	0	3503.1	1924.2	1582.7	1520	2082.9	3861.3	1579.4	2513.3	3028.6	3061.3	3284	1962.9	2452.6	3012.5	2903.3	3209.8	1539.5	1735.9	1193.1	1394.4	3737	1787	1013	3187	3031.9	3766.8	1778.8	2127.2	2833.5	3355.1		0.846377	1.12625	0.975526	0.935581	1.09597	0.995941
672	672	444	P61205	ADP-ribosylation factor 3 OS=Mus musculus OX=10090 GN=Arf3 PE=2 SV=2	Arf3	20.6	7.43	1792	60	96	9	6	514.2	217.5	744.1		342.5	835	224.5	796		457.6	1392.8	267.5	920		1595.2	890.1	97.2	812.5		413	1947.5	384.6	4876.9		1442.6	844.6	162.9	727.8		443.9	Acetyl [N-Term]	0.914322	0.725612	1.0115	NA	0.970061	0.905373
673	673	2940	Q9CT10	Ran-binding protein 3 OS=Mus musculus OX=10090 GN=Ranbp3 PE=1 SV=2	Ranbp3	52.5	5.12	3676	38	170	14	0	2156.9	1431.2	1726.2	1041.1	2483.2	2218.3	1870.5	1985.1	1118.6	3330.9	2391.5	1910.1	1933.3	1192	2365.5	2223.7	1894.5	2222.9	1174.8	3120.8	2443.7	1974.2	1235.3	1135.4	2545.8	2312.9	1586.9	1544.9	808.7	2536.1	Acetyl [N-Term]	0.778248	0.848383	1.04265	0.722957	0.761386	0.830724
674	674	864	Q9WV32	Actin-related protein 2/3 complex subunit 1B OS=Mus musculus OX=10090 GN=Arpc1b PE=1 SV=4	Arpc1b	41	8.35	2232	45	95	14	1	1147.4	1108.6	990.2	912.9	884.1	1516.2	1331.4	1320.1	763	1084.8	1986.7	2190	1513.4	962	2956.3	1154.5	1084.4	1303.9	788.5	798.2	3405.1	1927.5	9479	788.2	3302.4	1434	1317.7	963	678.1	1120	Acetyl [N-Term]	0.72949	0.98971	0.945786	0.888729	1.03245	0.917233
675	675	3839	Q61152	Tyrosine-protein phosphatase non-receptor type 18 OS=Mus musculus OX=10090 GN=Ptpn18 PE=1 SV=1	Ptpn18	50.2	8.27	5449	19	142	6	0	1875.1	888.7	1574.6	1842.7	1450.6	1794.1	728.4	1186.6	1591.7	1135.6	1602.2	913.4	1306.1	2192.5	718.4	1649.9	1033.8	1523.2	1765.7	1201.1	1302	705.5	380.8	1531.5	822.5	1733.1	865.1	1600.5	1656.3	1324.9		1.34881	1.18767	0.966	1.04059	1.1667	1.14195
676	676	1944	P62874	Guanine nucleotide-binding protein G(I)/G(S)/G(T) subunit beta-1 OS=Mus musculus OX=10090 GN=Gnb1 PE=1 SV=3	Gnb1	37.4	6	1871	36	93	11	0	27.5	59.9	184.8			41.9	59.8	249.9			38	49.7	227.3			38	35.1	261.7			69	75.2	1089.6			38.1	79.2	235.8			Acetyl [N-Term]	0.943577	1.32441	0.909308	NA	NA	1.0591
677	677	2225	Q03958	Prefoldin subunit 6 OS=Mus musculus OX=10090 GN=Pfdn6 PE=1 SV=1	Pfdn6	14.4	8.88	4563	63	251	13	0	9824.6	5964.9	5236	10071.1	7747.6	8931.5	5572	5088.7	9271.3	6259.3	6968.4	5296.5	5066.9	8805.3	4178.8	9979.5	6361.4	5364.6	9602.6	6747.4	5343.7	4731.5	1582.2	7803.5	4092.8	8602.9	5768.5	5535.7	9655.2	6670.1		1.08784	1.03527	0.963209	1.04141	1.06563	1.03867
678	678	3414	Q3V3R1	Monofunctional C1-tetrahydrofolate synthase, mitochondrial OS=Mus musculus OX=10090 GN=Mthfd1l PE=1 SV=2	Mthfd1l	105.7	7.02	1172	25	66	19	0	128.8	142.8	369.9	31.4	132.9	142.4	154.9	394.7	46.7	146.6	166.9	164.9	490	35	220.1	140.5	138.5	407.9	35.8	98.9	91.4	207.7	915.5	39.3	214.6	115.3	150.4	280.1	35.5	127		0.709653	0.970949	0.809691	0.760171	0.866303	0.823353
679	679	264	Q8C2Q3	RNA-binding protein 14 OS=Mus musculus OX=10090 GN=Rbm14 PE=1 SV=1	Rbm14	69.4	9.67	3872	26	152	15	0	1782	1690.1	2448.8	1767.2	649.3	2750.6	1832.7	2997.7	2935.9	968.5	2871.4	2468.4	3708	2175.4	745.3	2489.4	1340.1	3072.4	1698	620.7	2651.7	2274.5	1929.9	2197.1	920.3	2231.7	1700.6	3415.2	2286	955.7		1.13927	0.927921	0.81135	0.778637	0.986784	0.928793
680	680	1594	Q9CYH6	Ribosome biogenesis regulatory protein homolog OS=Mus musculus OX=10090 GN=Rrs1 PE=1 SV=1	Rrs1	41.5	10.77	2526	39	156	16	0	919.2	1936.3	1614	519.7	436.8	1224.1	2009.8	3536.5	1753.8	861.7	929.9	1943.2	2843.9	741	429.6	1168.3	1569.6	1761.3	518.6	402.4	445.1	1869.9	446.3	985.9	533.6	1166.7	2218.3	2456.9	1384.2	839.7		0.694726	1.10374	0.953108	0.789258	0.974469	0.903061
681	681	3902	E9Q5F9	Histone-lysine N-methyltransferase SETD2 OS=Mus musculus OX=10090 GN=Setd2 PE=1 SV=1	Setd2	285.5	6.3	608	12	64	24	0	685.1	365.4	249.6	23.1	268.1	620.9	378	237.5	37.6	317.9	485.4	329.4	219.5	25.8	235	603	401	324.9	22.7	252.3	389.6	326.6	134.8	23.7	233.9	683.3	391	285.7	47.7	277.3		1.20295	1.03439	1.1005	1.26862	0.872287	1.09575
682	682	1156	Q62376	U1 small nuclear ribonucleoprotein 70 kDa OS=Mus musculus OX=10090 GN=Snrnp70 PE=1 SV=2	Snrnp70	52	9.94	4803	37	207	15	0	4116.1	4139.3	5865.7	1742.6	3083.1	3876.4	4199.9	6182.9	2895.4	4596.1	3659	2767.4	5436.6	2030.3	2657.8	4793.5	3419.7	6043.2	1702.7	3549.3	2366.4	3076.9	3396.7	2036.3	2480.2	4765.1	3876.6	6346.5	2673.9	4830.9		1.02646	0.923022	1.22926	0.923499	1.05109	1.03067
683	683	1649	Q3THE2	Myosin regulatory light chain 12B OS=Mus musculus OX=10090 GN=Myl12b PE=1 SV=2	Myl12b	19.8	4.84	7634	62	322	9	9	5986	6092.1	6648.3	1511.4	2746.6	4901.7	3976.3	8917	2641.2	4209.8	8199	7924.6	11141.1	3228.6	13172.2	4570.3	3688.4	6713.5	1652.1	2928.4	7536.4	7171.4	11251.8	4213.1	9782.1	5843.2	4531.9	5842.8	2722.1	4484.8		0.655243	1.13973	1.19208	1.03063	1.06532	1.0166
684	684	16	Q0VGB7	Serine/threonine-protein phosphatase 4 regulatory subunit 2 OS=Mus musculus OX=10090 GN=Ppp4r2 PE=1 SV=1	Ppp4r2	46.5	4.56	2603	35	100	9	0	1008.1	3008.2	818.6	761.8	1158.6	947.5	2775.4	734.2	645	1249.4	789.1	1956.6	614.5	823.8	696.1	1062.8	4013.6	1249.3	979	1374.8	743.3	2255.5	407.6	534.1	774.9	996.1	2884.3	720.3	565.7	949		0.981068	1.03924	1.05129	0.877054	0.759565	0.941643
685	685	678	O35226	26S proteasome non-ATPase regulatory subunit 4 OS=Mus musculus OX=10090 GN=Psmd4 PE=1 SV=1	Psmd4	40.7	4.79	2837	39	126	11	0	829.3	501.4	558.1	1053.8	351.1	876.8	542.7	695.7	837.5	373.2	1004.2	590.9	821.6	845.6	573.9	869.8	472.5	588.1	1112.5	403.2	897.8	605.9	839.3	895.3	540.2	897.9	449.4	529.8	997	356.2		0.761535	0.828082	1.02406	1.19045	0.954448	0.951716
686	686	1197	Q61543	Golgi apparatus protein 1 OS=Mus musculus OX=10090 GN=Glg1 PE=1 SV=1	Glg1	133.6	6.84	1566	18	87	17	0	464.8	330.7	266.6	56.8	215.5	774	389.8	411.8	59.5	333.9	758.2	312.4	423.5	57.4	646.8	433.9	356.9	310.7	34.9	177.5	715	326.6	736.2	96.2	652.7	531.1	329.7	341.4	42.4	294.2		0.829043	0.845818	0.686176	0.712605	0.881102	0.790949
687	687	861	O89020	Afamin OS=Mus musculus OX=10090 GN=Afm PE=1 SV=2	Afm	69.3	5.78	1267	42	105	20	0	1148.9	304.1	356.2	167.6	298	1378	277.9	485.1	360.2	539.1	1260.8	356.3	554.7	551.9	547.8	960.4	242.6	292.9	68	268.6	1246.8	342.1	229.7	571.9	553.5	1299.5	259.9	406.2	271	611.4		0.837353	0.935228	0.943033	0.75236	1.13411	0.920417
688	688	4253	Q6Y7W8	GRB10-interacting GYF protein 2 OS=Mus musculus OX=10090 GN=Gigyf2 PE=1 SV=2	Gigyf2	149.1	5.57	2042	16	116	17	1	592	406.8	479.6	605.4	780.8	663.9	436.9	532.5	736.3	1001.7	591.1	379.2	432.5	606.1	604.2	583.7	444.8	351.7	622.1	801.1	455.9	390.8	568.3	612.2	701.9	648.4	407.9	639.8	700.7	907.9	Acetyl [N-Term]	1.2015	0.933623	0.976653	0.95165	0.906359	0.993958
689	689	1259	P35329	B-cell receptor CD22 OS=Mus musculus OX=10090 GN=Cd22 PE=1 SV=1	Cd22	96.5	7.93	1247	29	86	15	0	684.3	358	1006.4	225.4	356.3	1040.2	382.3	1366.3	255.5	542.1	1176.3	430.6	1393.3	267.8	588.4	858.1	358.2	1385.1	229.9	283	1702.2	397.7	1940.6	217.3	586	720.6	340.2	1273.7	239.5	514.6		0.932226	0.889877	0.692751	0.937378	0.949271	0.880301
690	690	2174	O55098	Serine/threonine-protein kinase 10 OS=Mus musculus OX=10090 GN=Stk10 PE=1 SV=2	Stk10	111.8	7.15	1868	23	124	20	2	1200.3	908.2	655	452.5	848.7	1453.6	1167.4	1060.8	920.3	1674.2	1358.7	1342.5	1044.3	817.3	1263	1343.9	919.5	980.6	498.3	974.8	1671.8	1128.8	1688.1	798.5	1476.7	1314.5	1105	866.7	747.6	1648		0.817025	0.946548	0.904307	0.812344	0.984351	0.892915
691	691	2536	P08226	Apolipoprotein E OS=Mus musculus OX=10090 GN=Apoe PE=1 SV=2	Apoe	35.8	5.68	2617	46	128	14	0	428.2	962.8	1078.8	500.4	1233.2	440.3	1245.1	2393.1	599.6	820.4	1437.1	1296.1	2190.8	523.2	1581.4	425.6	1131.3	2540.4	575.2	1262.1	384.4	929.3	2108.8	458	1185.7	533	1546.8	1585.8	572.6	767.2		0.662655	1.24231	1.21054	0.95497	0.935154	1.00113
692	692	905	P47962	60S ribosomal protein L5 OS=Mus musculus OX=10090 GN=Rpl5 PE=1 SV=3	Rpl5	34.4	9.77	2104	35	162	12	0	4425	4205	5467.5	1522.3	1950.5	2958.9	3696.4	8282.2	3686.7	5992.1	3833.8	3213.1	6873.2	1637.1	2677.4	3682.6	2869	5937.2	1153	3127	1845.7	3668.1	6433.8	1820.3	2665.6	6126.3	4561.9	9430.6	3381.6	6544.1		1.13866	1.23415	2.07047	0.917243	1.09212	1.29053
693	693	2690	P46471	26S proteasome regulatory subunit 7 OS=Mus musculus OX=10090 GN=Psmc2 PE=1 SV=5	Psmc2	48.6	5.95	1738	39	96	16	0	545.7	171.1	735.5	23.1	270.1	508.2	174.4	786.4	25.6	351	655.8	235.8	717.1	18.9	486.5	448.2	114.6	810.4	25	281	625.6	259.6	1588.1	22.2	502.9	595.8	133.2	788.2	47.9	312.9		1.00229	0.763761	1.17237	1.87109	0.891453	1.14019
694	694	808	P50580	Proliferation-associated protein 2G4 OS=Mus musculus OX=10090 GN=Pa2g4 PE=1 SV=3	Pa2g4	43.7	6.86	3277	43	173	14	0	812.7	1043.6	1584.3	57	463.8	1427	991.4	1872.1	85.2	855.8	2764.5	1573.9	2436.6	80.6	3396.7	1262.7	629	1745.8	54.6	526.9	1709.3	2364.7	5750.7	101.1	2954.5	1241.6	731.7	1004.4	58.3	719.7	Acetyl [N-Term]	0.53651	0.738047	0.870077	0.684272	0.840968	0.733975
695	695	4176	Q9WUK2	Eukaryotic translation initiation factor 4H OS=Mus musculus OX=10090 GN=Eif4h PE=1 SV=3	Eif4h	27.3	7.23	7209	56	339	14	0	11969.4	10002.8	10128.3	9253.3	8082.4	10065.9	9629.2	10518.5	8490.4	7465.3	8325.6	9170.3	9726.9	7516.7	3337.1	9613.8	8702.6	9976.4	9916	7882.3	4343.9	7735.9	1670.9	6939.4	3387	9662.9	9716.8	8927	8958.2	8314.9	Acetyl [N-Term]	0.848695	1.0091	0.959964	1.0551	1.11381	0.997332
696	696	3496	Q80WR5	UPF0688 protein C1orf174 homolog OS=Mus musculus OX=10090 PE=1 SV=1	Q80WR5	24.8	6.04	3169	69	150	11	0	2119.2	3654.7	1827.6	2239.7	2808.9	1511.6	3477.5	1353.7	1623	1626.4	1163	2918.9	1149.6	1576.2	687.1	1951.3	3439.6	1673.2	2204.7	2645.1	914	2639	192.5	1188.1	722.1	2335.5	4041.6	1905.2	2031.1	1651.3		1.4074	1.16221	1.54505	1.25145	1.01531	1.27629
697	697	4362	P05202	Aspartate aminotransferase, mitochondrial OS=Mus musculus OX=10090 GN=Got2 PE=1 SV=1	Got2	47.4	9	1362	31	88	14	0	187.8	54.6	1203	623.4	621.4	265.2	78.8	1249.8	546	652.9	294.6	79.9	1429.8	505.9	1581.2	238.6	33.9	1396	640.2	562.1	341.9	150.2	6204.2	619.4	1529.1	234	62.8	1140.1	524.7	595.5		0.912226	0.796954	0.882353	0.960989	0.912085	0.892921
698	698	3624	O09000	Nuclear receptor coactivator 3 OS=Mus musculus OX=10090 GN=Ncoa3 PE=1 SV=2	Ncoa3	151.5	7.77	1324	17	102	17	1	858.7	628.7	1007	1012	633.8	999.8	710.8	887.5	984.9	706.1	888.9	854.8	985.4	1483.2	515	815.4	795.2	1117.4	1174	528.1	887.7	681.1	638.6	1141.9	566.4	775.8	717.9	1098.2	971.7	584.1		1.23741	1.00999	0.775955	0.986598	0.82722	0.967434
699	699	2595	Q99NH0	Ankyrin repeat domain-containing protein 17 OS=Mus musculus OX=10090 GN=Ankrd17 PE=1 SV=2	Ankrd17	274	6.52	1946	11	129	16	0	728.4	806.5	615.7	1668.5	1128.2	623.4	1018.4	582.9	1399	828.4	513.5	1055	533.7	1573.4	340.7	664.2	947.4	697.9	1931.8	1043.8	280.5	974.3	228.3	1189.1	360.1	708.5	916	617	1422.7	847.1		1.0585	0.89945	1.13651	1.01694	1.02257	1.02679
700	700	3601	E9PYL2	Proline-rich protein 12 OS=Mus musculus OX=10090 GN=Prr12 PE=1 SV=1	Prr12	211.7	7.65	1015	16	70	17	0	241.4	287.2	165	179.7	281.4	217.6	363.3	151.8	194.4	305.3	150.3	357.8	152.2	210.2	163.4	192.6	384.9	186.3	208.4	284.6	131.8	305.6	98.7	156.4	179.7	228.1	333.1	159.8	185.4	276.4		1.0527	0.916873	1.04825	0.953704	0.905339	0.975374
701	701	1462	Q4QRL3	Coiled-coil domain-containing protein 88B OS=Mus musculus OX=10090 GN=Ccdc88b PE=1 SV=2	Ccdc88b	166.5	5.33	684	17	55	21	0	182.7	11.8	100.7	194.7	108.7	184.1	22.4	98.9	130.8	113.1	149	31.5	104.6	171.2	98.8	208.2	9	121.6	265	89.9	202.7	43	155.7	90.8	101.2	178	26.6	130.8	146.2	101.6		1.32255	1.1875	0.966866	1.11774	0.89832	1.09859
702	702	3211	P11103	Poly [ADP-ribose] polymerase 1 OS=Mus musculus OX=10090 GN=Parp1 PE=1 SV=3	Parp1	113	8.95	557	22	54	17	0	233.8	67	459.9		93.2	386.3	89.2	617.4		143.2	647.8	121.1	581.9		358.5	345.1	39.1	530.5		129.8	662.8	168.2	1448.6		391.4	332.9	61	451.5		132.7		0.731293	0.683857	0.861765	NA	0.926676	0.800898
703	703	1149	Q9EP71	Ankycorbin OS=Mus musculus OX=10090 GN=Rai14 PE=1 SV=1	Rai14	108.8	6.27	648	24	46	19	0	72.3		45.8		13.1	175		92		40.3	186		124.7		81.6	78.1		65		21.8	382.7		147.4		94.6	116.2		63.9		34.4		0.694565	NA	0.664	NA	0.853598	0.737388
704	704	235	O08999	Latent-transforming growth factor beta-binding protein 2 OS=Mus musculus OX=10090 GN=Ltbp2 PE=1 SV=2	Ltbp2	195.7	5.29	1580	12	95	18	0	628	1113	135.5	423.9	680.5	664.7	1431.5	159	493.4	971.3	606.2	1454.5	150.8	436.7	498.7	586.6	1269.5	170	400.7	730.6	528.5	1260.2	68.6	419.6	505.1	745.1	1402.6	171.5	440.1	831.5		1.07862	0.979811	1.12096	0.891974	0.856069	0.985486
705	705	1721	Q61166	Microtubule-associated protein RP/EB family member 1 OS=Mus musculus OX=10090 GN=Mapre1 PE=1 SV=3	Mapre1	30	5.22	2459	54	118	11	2	1672.4	994.8	1985.6	1482.7	1229.2	2030.4	1437.6	2725	1962	1962.5	1728.5	2160.8	2470	2561.5	1809.9	1518.1	992.8	2748.4	2059.4	1136.4	2321.8	1650.5	3180.6	2044.1	2567	2154.6	1290.8	2204.8	1620	1545.5	Acetyl [N-Term]	0.809101	0.897885	1.06117	0.825688	0.787516	0.876272
706	706	4091	Q91V92	ATP-citrate synthase OS=Mus musculus OX=10090 GN=Acly PE=1 SV=1	Acly	119.7	7.44	707	23	54	22	0	21.7	95	534.3			23.6	86.1	576.9			66.6	120.2	666.8			37.3	83.6	588.5			44.6	128.7	2492.7			61.3	80.3	392.7				0.680707	0.932636	2.59746	NA	NA	1.4036
707	707	171	P15806	Transcription factor E2-alpha OS=Mus musculus OX=10090 GN=Tcf3 PE=1 SV=2	Tcf3	67.7	6.38	3530	30	135	12	0	1403.4	2557.6	1369.6	1259.1	922.9	1132.6	2455.8	995.7	898.1	756.6	908.6	2125.3	829.7	981.2	371.4	1313.5	3189.2	1487	1195.5	1084.7	400.3	1972.3	222.7	770.5	326.1	1342.1	2632.7	1193.9	979.4	751.6		1.19906	1.07203	1.18497	1.09052	0.993391	1.108
708	708	1016	Q5NCR9	Nuclear speckle splicing regulatory protein 1 OS=Mus musculus OX=10090 GN=Nsrp1 PE=1 SV=1	Nsrp1	63.8	8.76	1927	31	196	15	0	3194	2363.3	2745.8	4383.3	3709.5	2526.9	2392.4	2142.9	3588.4	2890.7	2071.5	2144.4	1943.7	3777.9	1508.3	3134.7	2916.2	2691.4	4529.3	3738.8	1689.3	1949.7	508.3	3301	1678.3	2707.4	2466.7	2474.6	3517.8	3084.2		1.15479	1.03106	1.07143	0.980325	1.06694	1.06091
709	709	362	P26443	Glutamate dehydrogenase 1, mitochondrial OS=Mus musculus OX=10090 GN=Glud1 PE=1 SV=1	Glud1	61.3	8	1227	34	74	16	0	135.7	26.9	536	45.6	155.9	202.6	32.4	551.4	54.7	232.6	272.6	47.8	619.3	62.3	1209.7	107.6	31.4	514.4	47	174	423.6	39.8	3984.2	77.7	1231.7	158.5	35.7	424.5	46.7	193.2		0.769859	1.10185	0.78233	0.853748	0.83061	0.86768
710	710	458	P37804	Transgelin OS=Mus musculus OX=10090 GN=Tagln PE=1 SV=3	Tagln	22.6	8.81	3248	52	159	11	0	1337.9	1490.5	2189	468	1292.7	1965.5	1745.7	2469.3	507.8	2240.8	2733.8	1712.4	2313.9	479.9	5224.9	1831	972	2334.9	428.3	1300.5	4867.4	2437.4	12734.1	814.5	4912.7	1969.2	1599.4	1441.1	386	1502.9		0.583607	0.916194	1.00188	0.760142	0.670698	0.786505
711	711	1551	P97310	DNA replication licensing factor MCM2 OS=Mus musculus OX=10090 GN=Mcm2 PE=1 SV=3	Mcm2	102	5.72	1286	28	80	16	0	184.9	223.9	131.4	38.3	143.8	155.1	197.5	152.3	29.4	165.1	227.5	198.7	182.8	19.9	291.8	168.2	255	164.6	51.7	157.2	167.7	209.8	209.5	34.3	253.1	214	183.5	107.7	37.2	135.5		0.707157	0.929114	1.37975	1.26531	0.820715	1.02041
712	712	2427	Q9JJ89	Coiled-coil domain-containing protein 86 OS=Mus musculus OX=10090 GN=Ccdc86 PE=1 SV=2	Ccdc86	46.5	9.64	2538	34	173	14	0	4771.4	3988.5	5650.4	1967.4	977.2	3436.1	3312.4	4385.8	2089.6	689.2	1915.3	1937.6	3873.3	1162.5	162.3	5588.8	4372.4	5541.6	2167.9	1318.4	877	2106.5	710.2	1178.5	221.2	3462.5	3455.9	4747	2103.3	696.5		1.08236	1.04332	1.00768	1.00656	1.01059	1.0301
713	713	2662	Q80XI3	Eukaryotic translation initiation factor 4 gamma 3 OS=Mus musculus OX=10090 GN=Eif4g3 PE=1 SV=2	Eif4g3	174.8	5.53	1592	13	96	18	0	89.7	951	109.3	121.4	397.1	110.1	1354.1	102.4	134.6	382.4	94.4	1305.8	119.8	142.5	259.5	145.6	1358.4	141.9	139.6	312.1	99.5	1315	95.9	118.3	313.8	118.3	1291.1	125	132.5	358.8		1.2207	0.953475	1.07448	0.984398	0.938285	1.03427
714	714	1969	Q9Z2Q2	Lysine-rich nucleolar protein 1 OS=Mus musculus OX=10090 GN=Knop1 PE=1 SV=2	Knop1	53.8	9.8	1429	33	78	17	0	247	2200.3	1256.1	79.6	43.7	211	1950.9	994.8	67.3	68.2	181.4	1442.8	990.2	68.6	72.9	257	2454.3	1264	85.3	64.1	67.8	1665.6	333.8	68.1	56.7	237.9	2178.1	1274.6	72.7	67.9		1.28126	1.11646	1.12749	1.08024	0.995601	1.12021
715	715	4084	Q61171	Peroxiredoxin-2 OS=Mus musculus OX=10090 GN=Prdx2 PE=1 SV=3	Prdx2	21.8	5.41	5250	63	316	11	0	5042.8	2929.4	4362	5186.1	5231.8	6659.1	2193.5	5536.7	3642.1	5046.5	9230.6	3599.8	6765.7	4401.7	18554.1	6086.8	1680.8	3884.3	4361.5	4631	13494.2	4321.1	16752	4434.2	14434.4	7848	2266.7	4479	3912.5	5464.5	Acetyl [N-Term]	0.808966	1.03337	1.17854	1.07424	1.08283	1.03559
716	716	1328	P97450	ATP synthase-coupling factor 6, mitochondrial OS=Mus musculus OX=10090 GN=Atp5j PE=1 SV=1	Atp5j	12.5	9.36	5302	49	339	7	0	19942	15662.2	16140.2	23699.6	14291.9	15585.1	15257	13653.7	18467	12024.3	11995.5	13016.9	12565.4	19592.7	6191.6	16520.8	19578.3	15553.7	25144.8	16514	10082.2	12464.9	2126.7	17165	6943.9	17115.9	15508	14688	18618.7	11899.2		1.07575	1.01645	1.09822	1.00821	0.989596	1.03765
717	717	94	Q3UMF0	Cordon-bleu protein-like 1 OS=Mus musculus OX=10090 GN=Cobll1 PE=1 SV=2	Cobll1	137.3	8.16	1242	23	88	19	0	141.3	417.2	189.1	206.9	409.4	135.7	458	271.7	271.2	462.3	114.7	480.1	277.5	336.6	339.1	103.8	473.7	163.3	289.2	385.3	131.8	509.6	86.8	244.4	390.6	158.7	436.4	219.1	251.4	413.7		0.806404	0.952838	1.16949	0.926991	0.894873	0.95012
718	718	2020	Q9D8Y0	EF-hand domain-containing protein D2 OS=Mus musculus OX=10090 GN=Efhd2 PE=1 SV=1	Efhd2	26.8	5.06	3881	49	164	13	0	4333.3	2129.9	1770.8	1565.9	2421.7	4702.4	2617.7	3542.8	2758.7	3503	3504.9	3155.6	3308.9	2521.8	3512.2	3971.6	1933.4	1950.6	1926.4	1984.3	6057.7	2631.7	3344.1	2974.4	4074.3	5341.9	2514.9	2770.5	1926.3	2952.1	Acetyl [N-Term]	0.782009	0.960729	1.13599	0.698264	0.842735	0.883946
719	719	1355	Q02614	SAP30-binding protein OS=Mus musculus OX=10090 GN=Sap30bp PE=1 SV=2	Sap30bp	33.8	4.87	1677	46	128	15	0	2091.6	1406.9	790.8	1572.2	1000.7	2142.2	1607.3	1083.1	1861.6	1081.9	1644.6	1532.8	1049.5	1945.2	752	2095.4	1409	1131.8	1542.1	972.4	1581.7	1420.2	835.5	1674.5	814.2	2062.5	1536.9	980.7	1841.2	1026.4		0.905457	0.9562	0.962795	0.989042	0.948701	0.952439
720	720	1758	Q8C551	RAD51-associated protein 1 OS=Mus musculus OX=10090 GN=Rad51ap1 PE=1 SV=2	Rad51ap1	36.2	9.38	2567	31	129	9	0	1839.8	2695.7	2130.9	3913	3074.2	1404.4	2486.1	1812.5	2673.5	2009.5	870.8	1736.3	1436.3	2379.7	692.9	1593.7	3121.5	1746	3584.9	3000.4	332.5	1743.6	383	1827.5	639	1942.4	3219.5	2219.1	3145.5	2256.9		1.22433	1.295	1.38308	1.17655	1.12312	1.24042
721	721	204	P62821	Ras-related protein Rab-1A OS=Mus musculus OX=10090 GN=Rab1A PE=1 SV=3	Rab1A	22.7	6.21	2745	63	154	12	6	1615.4	1696.9	1388	509	762.3	3350	2069.1	1792.7	744.6	912.8	3039.5	1639.8	1573.2	389.9	1615.3	2593.7	959.2	1648.3	311.4	726.7	5078.7	2182.4	4744.4	787.9	1503.9	2452.5	1487.6	1790.6	608.4	847.4	Acetyl [N-Term]	0.998829	0.71896	0.73209	0.817083	0.928352	0.839063
722	722	12	Q99LC5	Electron transfer flavoprotein subunit alpha, mitochondrial OS=Mus musculus OX=10090 GN=Etfa PE=1 SV=2	Etfa	35	8.38	983	51	69	12	0	37.8	90.9	327.3		66.2	128.9	132.7	299.7		64.3	244.6	200.6	361.8		137.1	75.6	54.7	335.6		54.7	332.5	257.3	1390.7		143.6	102.6	98	256.6		57.3		0.85619	0.738508	0.795966	NA	0.891135	0.82045
723	723	81	P56399	Ubiquitin carboxyl-terminal hydrolase 5 OS=Mus musculus OX=10090 GN=Usp5 PE=1 SV=1	Usp5	95.8	5.01	1917	29	120	17	0	133.7	173.8	636.3		244.9	280.6	216.3	917.6		421.5	474.4	392.2	1153.2		1156	162.8	85.7	705.5		294.7	636.2	462.1	3378.2		1165.9	180.7	156.7	623.2		346	Acetyl [N-Term]	0.679163	0.724457	0.643977	NA	0.820878	0.717119
724	724	4525	Q6NVE8	WD repeat-containing protein 44 OS=Mus musculus OX=10090 GN=Wdr44 PE=1 SV=1	Wdr44	101.5	5.24	1648	21	90	11	0	227.3	168.4	39.5	556.2	590.5	274.3	256.9	42.5	421.6	530.6	227	323.3	36.3	654.7	416	214.5	227.4	44.2	512.6	505.4	340.6	277.9	30.2	475.8	492.2	286.6	263.5	56.3	490.2	503.1		1.32471	1.02569	1.04484	1.16271	0.948172	1.10122
725	725	3015	Q9EPJ9	ADP-ribosylation factor GTPase-activating protein 1 OS=Mus musculus OX=10090 GN=Arfgap1 PE=1 SV=2	Arfgap1	45.3	5.57	2435	43	104	12	0	344.9	494	343.3	803.6	656	397.1	488.6	388.5	842.6	768.6	381	598	410.5	1268.9	672.9	286.3	486.8	366.2	681.9	564.2	371.2	487.5	273.7	882.8	679.5	384.1	484.8	320.8	738.7	655.7		0.82574	0.992223	0.967263	0.876691	0.85311	0.903005
726	726	2914	Q64433	10 kDa heat shock protein, mitochondrial OS=Mus musculus OX=10090 GN=Hspe1 PE=1 SV=2	Hspe1	11	8.35	12176	85	1036	14	0	37805.4	45069.3	40942.3	60151	40099.8	36589.1	51027.7	41082.8	55015.6	35764	24804.8	38450.1	32685.8	46418.7	17832.8	33971	49659.8	41283.4	73923.6	44845.9	19683.6	36910.3	5903	49047	19030.1	36771.4	50968.2	43585.6	54146.4	32857.5		1.06092	0.998834	1.00498	0.984201	0.918731	0.993534
727	727	3457	Q6P8I4	PEST proteolytic signal-containing nuclear protein OS=Mus musculus OX=10090 GN=Pcnp PE=1 SV=1	Pcnp	19	7.49	3664	67	212	9	0	9498.4	10768.9	12280.2	19752.8	14073.2	7431.3	10309.7	10381.3	15701.4	9949.5	5508.8	9227	9261.6	15243.2	4728.8	7982.7	12536	11289.1	20363.4	13647.4	5107.2	8361.5	1776.5	12231.7	5322.7	9358.9	12104.5	13280.6	17417.1	10453.1		1.27928	1.17409	1.25939	1.10927	1.05062	1.17453
728	728	2284	Q91VL8	Telomeric repeat-binding factor 2-interacting protein 1 OS=Mus musculus OX=10090 GN=Terf2ip PE=1 SV=1	Terf2ip	43.3	4.81	1987	49	106	12	0	989.6	656	401.7	332.3	347.2	1190	783	498.1	406.9	433	1133.2	663.9	542.8	502.5	418.9	1263.6	658.5	476	256.3	299.9	1058.8	645.6	389.7	437.7	412.2	1042.4	774.2	465.6	408.5	402		0.934752	0.988761	0.875966	1.00393	0.928406	0.946364
729	729	1245	O88844	Isocitrate dehydrogenase [NADP] cytoplasmic OS=Mus musculus OX=10090 GN=Idh1 PE=1 SV=2	Idh1	46.6	7.17	784	40	50	17	0	19.3		538.8		13.1	39.9		589.5		34.6	51.5		627		136.4	11.4		584.8		19.8	71		4617.8		147.6	37.8		490.4		27.9		0.831891	NA	0.947368	NA	0.806358	0.861873
730	730	2609	Q9DBG3	AP-2 complex subunit beta OS=Mus musculus OX=10090 GN=Ap2b1 PE=1 SV=1	Ap2b1	104.5	5.38	972	25	83	18	7	475.6	98.3	585		138.6	478	98.5	673.3		156.1	494.4	128	746.5		307	468.3	77.3	593.8		137.7	575.6	165	2621.7		332.3	470.7	84.7	534.3		161		0.793554	0.859898	0.984728	NA	1.03139	0.917393
731	731	3365	P20065	Thymosin beta-4 OS=Mus musculus OX=10090 GN=Tmsb4x PE=1 SV=1	Tmsb4x	5.7	5.06	3981	54	1070	9	0	13075.6	9827.4	4994.1	24436.5	20806.5	10913.7	17948.6	25604.2	23031	29854.2	9365.4	39386	23051.1	32354.7	17445.1	3619.1	6292.4	5187.4	28481.3	29019.6	14534	16265.6	3338.6	23284.6	29393.1	9832.8	20709.1	4575.6	19917.5	24814.5		0.178705	1.1538	0.900959	0.864813	0.83119	0.785893
732	732	2195	Q9D2G2	Dihydrolipoyllysine-residue succinyltransferase component of 2-oxoglutarate dehydrogenase complex, mitochondrial OS=Mus musculus OX=10090 GN=Dlst PE=1 SV=1	Dlst	49	8.95	3227	30	134	11	0	10669.4	1187.7	430.6	1706.3	699.2	2678.3	921.4	358.6	945.9	710.1	2276.7	834.3	283.4	943.3	537.3	3746.6	3820.7	402.2	2807.1	888.8	2382.5	1040.1	476.2	796.4	548.5	7917.2	923	545	1553.8	569.8		1.5198	1.00174	2.95605	1.64267	0.802422	1.58454
733	733	4675	Q8K124	Pleckstrin homology domain-containing family O member 2 OS=Mus musculus OX=10090 GN=Plekho2 PE=1 SV=1	Plekho2	53.8	5.5	2520	45	131	15	0	772.5	1304.2	690.6	1520.5	783.3	926.9	1850.8	919.3	1869.1	987.2	906.9	2120.1	880.5	2144.7	985.9	828	1428	930.2	1611.5	848.8	1758	1853	969.7	2047.3	1242.5	906.9	1613.5	799.2	1482.8	845.5		0.869357	0.871785	0.978423	0.793323	0.856463	0.87387
734	734	4611	Q70IV5	Synemin OS=Mus musculus OX=10090 GN=Synm PE=1 SV=2	Synm	173.1	5.12	809	20	74	19	0	63.6	344.8	113.7	18.3	68.7	69.9	405.2	287.9	35	80.7	45.8	432.5	185.9	30.7	71.3	53	444.8	122.9	34.9	82.5	98	544.6	147.2	25.9	80.3	74.4	633.9	181.9	34	90.9		0.631817	1.56441	1.06438	0.971429	1.12639	1.07169
735	735	3510	Q3UMU9	Hepatoma-derived growth factor-related protein 2 OS=Mus musculus OX=10090 GN=Hdgfl2 PE=1 SV=1	Hdgfl2	74.2	8.66	2975	27	215	18	0	3914.1	4316.1	2919.5	2193.3	1362.7	3174.3	3352.1	2983.1	2288.5	1114	2252.4	2626	2803.9	1685.3	478.7	3722.6	3981	2617.1	1915	1336.4	1015.2	2772.2	1033.3	1665.1	409.3	3364.1	3681.4	3292	2426.2	1123.5		1.10355	1.09824	1.05979	1.06017	1.00853	1.06606
736	736	3847	Q9D1L9	Ragulator complex protein LAMTOR5 OS=Mus musculus OX=10090 GN=Lamtor5 PE=1 SV=1	Lamtor5	9.6	4.87	5329	97	188	6	0	3973	2380.8	3805.6	4985.4	3498.5	3357.5	2498.1	3119.9	4618.7	3209.4	3336.5	2913.9	3005.6	5277.6	2042.2	3851.9	2815.5	4047.8	5244.6	3212.6	3376.2	2357.4	801.7	4984.2	2182.8	3471.5	2321	3409.2	4691.8	3405.1	Acetyl [N-Term]	1.09273	0.929106	1.03395	1.01583	1.06098	1.02652
737	737	1676	P47757	F-actin-capping protein subunit beta OS=Mus musculus OX=10090 GN=Capzb PE=1 SV=3	Capzb	31.3	5.74	2443	48	112	12	0	1200.1	333.4	865.6		449.7	1824.4	410.4	1268.3		720	2996.8	847.7	1766		3414.3	1504	165.9	1117.8		470.1	5239.2	1017.9	9251.9		3803.2	1571	256.8	714.7		675.1	Acetyl [N-Term]	0.56351	0.625731	0.861105	NA	0.937639	0.746996
738	738	1715	Q9QYR6	Microtubule-associated protein 1A OS=Mus musculus OX=10090 GN=Map1a PE=1 SV=2	Map1a	300	5	557	10	55	19	0	172.2	105.7	63.8	81.1	468.7	202.3	149.3	58.6	99.8	622.2	165.6	141.4	50.2	84.1	341.8	150.1	118.7	76.1	88	513.1	196.8	133.9	18.5	80.5	395.8	210.2	142.6	61.7	98.8	566.3		1.0529	0.955124	1.03905	0.98998	0.910158	0.989443
739	739	4413	P17563	Methanethiol oxidase OS=Mus musculus OX=10090 GN=Selenbp1 PE=1 SV=2	Selenbp1	52.5	6.29	980	41	65	14	0	56.3	48.8	516.3	55.5	21	81.6	65.2	619.9	61.1	39.4	86.3	73.4	626.9	68.8	125.3	49	30.4	495.7	54.9	31.1	158.6	83.9	2993.7	68.4	153.7	82	28.9	608.9	68.8	37.8		0.982255	0.443252	1.0049	1.12602	0.959391	0.903164
740	740	2100	P50247	Adenosylhomocysteinase OS=Mus musculus OX=10090 GN=Ahcy PE=1 SV=3	Ahcy	47.7	6.54	1084	36	75	14	2	277	241.4	1136.5	96.6	357.5	388.3	233.3	1075	84.1	461.1	628.5	380.8	1451.4	72.2	1542.6	436.3	212.5	1355.8	95.2	469.8	810.5	505.1	7097.8	121.7	1562	343.1	204.6	798.3	43.2	397.1		0.742605	0.876982	0.883595	0.513674	0.861201	0.775612
741	741	2012	Q8VDM6	Heterogeneous nuclear ribonucleoprotein U-like protein 1 OS=Mus musculus OX=10090 GN=Hnrnpul1 PE=1 SV=1	Hnrnpul1	95.9	6.58	1215	23	87	15	0	655.6	319.9	400.6	191.6	668.4	686.3	378.7	324.1	176.7	711.4	626.3	495.6	405.5	180.7	627.6	584.4	374.3	434	154.2	733.7	806.4	438.6	466.8	144.8	759.6	752.2	386.8	349.8	145.9	654.7		1.0793	1.02139	1.09602	0.825693	0.920298	0.98854
742	742	1841	Q99PP2	Zinc finger protein 318 OS=Mus musculus OX=10090 GN=Znf318 PE=1 SV=3	Znf318	246.2	7.01	487	11	35	18	0	21.4	63.6	30.6	33.7		22.3	61.8	19.6	37.1		16	81	23.9	32		32.2	73.6	26.4	28.4		28.5	65.1	7.4	32.8		12.8	63.9	30	24.6			1.53061	1.03398	0.573991	0.663073	NA	0.950414
743	743	4623	Q9D9Z1	Small kinetochore-associated protein OS=Mus musculus OX=10090 GN=Knstrn PE=2 SV=2	Knstrn	34.7	5.2	1965	47	103	12	0	968.8	1075.6	523.3	1795.5	831.7	834	816.3	331.8	1422.2	532.1	728.4	842.2	347	1542.7	329.7	982.9	1034.7	437.2	1370	583.8	173.2	767.7	60.8	1113.8	317.6	980.5	1070.8	512.6	1752.3	674.6		1.54491	1.31177	1.17566	1.23211	1.26781	1.30645
744	744	1207	O89090	Transcription factor Sp1 OS=Mus musculus OX=10090 GN=Sp1 PE=1 SV=2	Sp1	80.7	7.34	4459	14	148	8	0	860.7	3339.5	1273.5	1338.7	1002.9	796.7	3851.7	1103.9	1148.5	1052	630.2	2234	1082.1	975	573	934.2	2817.7	1435.8	1485.2	1331.6	557.1	2592.6	340.3	1128.8	666.4	696.3	2765.7	950	1138	868.9	Acetyl [N-Term]	0.860585	0.718047	0.87398	0.990858	0.825951	0.853884
745	745	547	Q01147	Cyclic AMP-responsive element-binding protein 1 OS=Mus musculus OX=10090 GN=Creb1 PE=1 SV=1	Creb1	36.7	5.57	5127	28	222	7	0	1736.4	1391.1	1279.2	2119.8	1881.5	1800.8	1769.7	1312.5	1974	1928.9	1440.9	1768.2	1187.1	2343.1	1293.8	1460.9	1505.3	1290.9	2282.6	2208.2	1583.9	1303.4	286.1	2016.7	1633.1	1805.1	1712.6	1439.4	2086.4	1933.8		1.09669	0.967735	1.00239	1.05694	1.00254	1.02526
746	746	2030	Q922Y1	UBX domain-containing protein 1 OS=Mus musculus OX=10090 GN=Ubxn1 PE=1 SV=1	Ubxn1	33.6	5.26	1948	58	103	15	0	351.8	722	499.1	674.6	543.3	442.2	859.4	639.5	565.7	595.1	422	919.3	701.3	717.8	612.9	442.6	743.6	587.6	622.4	642.4	432.7	841.5	594.2	705.5	641.4	333.9	742.9	540.9	577.8	585.8	Acetyl [N-Term]	0.845817	0.86444	0.755088	1.02139	0.984372	0.894221
747	747	3068	Q6PDK2	Histone-lysine N-methyltransferase 2D OS=Mus musculus OX=10090 GN=Kmt2d PE=1 SV=2	Kmt2d	599.9	5.8	987	6	75	19	0	113.5	184.9	524.6	605.9	196.7	128.7	213.6	525.4	675.2	214.7	108.1	258.1	527.3	602.2	164.5	137.3	193.5	551.2	646.6	208.2	119.4	227.2	170.6	499.2	201.2	124.6	210.1	469.2	635.4	184.4		0.893034	0.983614	0.968143	0.941055	0.858873	0.928944
748	748	1625	Q8CB77	Elongin-A OS=Mus musculus OX=10090 GN=Eloa PE=1 SV=3	Eloa	87.1	9.61	1208	24	110	18	0	672.3	2127.6	492.1	903	1288.5	877.6	2763.6	684.1	1811.2	1451.9	866	3404.5	632.7	1235.5	822.5	685.7	1619.9	627.6	878.7	843.8	873.1	3675	566.7	1430.1	869.9	975	3002.3	657.9	1354.2	1411.1	Acetyl [N-Term]	0.961702	1.08637	1.11098	0.747681	0.971899	0.975728
749	749	1356	Q8K2Q9	Shootin-1 OS=Mus musculus OX=10090 GN=Shtn1 PE=1 SV=1	Shtn1	71.3	5.44	1430	31	85	15	0	257.7	200.7	131.4	271.5	230.3	312.5	302.2	161.1	276.1	293.1	235.9	348.5	158.8	344.8	339.3	224.8	221.8	170.6	317.9	219.2	394.6	259.2	175.9	265.4	556.7	289.2	275.5	143.5	225.4	322.6		0.890751	0.911648	0.92544	0.816371	1.10065	0.928972
750	750	138	O08579	Emerin OS=Mus musculus OX=10090 GN=Emd PE=1 SV=1	Emd	29.4	5.01	2944	42	159	10	0	2347.5	1421.1	2340.4	2167.9	1719.2	2431.7	1536.8	2085.5	1830.4	1583	2745.4	2363.3	2557.6	2405.4	1415.5	2289.1	1611.5	2486	1936.5	1618.4	2543	1864.7	1242.5	1853.7	1418.4	2220.3	1666.7	2346.7	1873	1619.1	Acetyl [N-Term]	1.12525	1.08453	0.913065	1.02327	1.0228	1.03378
751	751	513	Q64012	RNA-binding protein Raly OS=Mus musculus OX=10090 GN=Raly PE=1 SV=3	Raly	33.2	8.84	3334	54	131	13	0	1214.1	1331.2	1012.1	743	794.4	1348.5	1488.6	1321.9	1593.3	1726	1379.5	1586.5	1263.8	750.6	790.6	1214.6	1159.3	1111.5	771.6	993.2	1203.1	1884.8	1510.1	873.2	893.3	2038.4	1441.7	1241.5	1158.1	1428.7		0.939178	0.968494	1.51161	0.726856	0.827752	0.994777
752	752	2518	P84096	Rho-related GTP-binding protein RhoG OS=Mus musculus OX=10090 GN=Rhog PE=1 SV=1	Rhog	21.3	8.12	1678	50	79	8	0	47.2	123.3	372.4	31.4	144.1	58	134.5	480.4	19.2	162.6	56.8	159.5	453.3	39.5	265.8	45.2	75.5	462.2	26.4	138.2	71.2	177.3	1414.9	37.1	263.8	50.8	120.7	454.5	28.3	163.1		0.946087	0.897398	0.875862	1.47396	1.00308	1.03928
753	753	2464	Q99MN1	Lysine--tRNA ligase OS=Mus musculus OX=10090 GN=Kars PE=1 SV=1	Kars	67.8	5.94	949	27	65	17	0	142.2	149.5	340.2	764.8	262.2	170	205	576.3	524.1	257.5	189.8	382.7	711.5	674.9	431.4	201.5	114.6	375.8	791.2	202.9	155.9	264	1260.9	432.7	433.7	153.5	200.7	263.8	462.2	253.4	Acetyl [N-Term]	0.457748	0.979024	0.902941	0.881893	0.984078	0.841137
754	754	2446	Q61081	Hsp90 co-chaperone Cdc37 OS=Mus musculus OX=10090 GN=Cdc37 PE=1 SV=1	Cdc37	44.6	5.34	2614	31	142	11	0	848.5	213.5	937.5	352.4	445.5	1395.7	237.8	1440.4	457.3	657.8	1954.6	357.3	1949.1	443.3	1320.1	1067.7	123.6	1062	330.2	395.3	1816.5	447	3104.4	608.1	1344.2	1199	196.8	929.3	374.3	607		0.645168	0.827586	0.859067	0.8185	0.922773	0.814619
755	755	3424	Q76MZ3	Serine/threonine-protein phosphatase 2A 65 kDa regulatory subunit A alpha isoform OS=Mus musculus OX=10090 GN=Ppp2r1a PE=1 SV=3	Ppp2r1a	65.3	5.11	1134	36	78	17	2	154.4	64.3	485.8		111.9	272	70.2	659		178.8	475.4	112.3	808.3		780.3	221.2	32.6	505.9		92.9	576.9	164.1	3807.3		744.9	212.8	43.5	506.8		168	Acetyl [N-Term]	0.769044	0.619658	0.782353	NA	0.939597	0.777663
756	756	247	Q8BG32	26S proteasome non-ATPase regulatory subunit 11 OS=Mus musculus OX=10090 GN=Psmd11 PE=1 SV=3	Psmd11	47.4	6.48	1005	41	76	17	0	207		505.5		32.6	348.5		552.3		56	595.3		665.4		256.8	318.7		551.4		29.9	602.4		2175.6		237.1	292		437.2		55	Acetyl [N-Term]	0.791599	NA	0.837877	NA	0.982143	0.870539
757	757	1846	Q8CIN4	Serine/threonine-protein kinase PAK 2 OS=Mus musculus OX=10090 GN=Pak2 PE=1 SV=1	Pak2	57.9	5.77	1924	38	113	15	2	630.7	812.2	544.7	435.3	540.9	725.6	1337.3	1038.7	766.5	1165.8	878.8	1354.9	890.6	560.9	964	929.9	957	950.1	457.7	920.6	1177	1669.3	2592.5	801.4	1193.1	673.2	937.1	572.7	401.3	629.1	Acetyl [N-Term]	0.551362	0.70074	0.927784	0.523549	0.539629	0.648613
758	758	1964	Q3U9G9	Lamin-B receptor OS=Mus musculus OX=10090 GN=Lbr PE=1 SV=2	Lbr	71.4	9.36	2799	22	208	16	0	7229.4	4448.1	4713.6	4474	4663.2	10758	5587.5	7201.7	8022.6	8287.8	11516.5	9033.3	7130.6	6373.7	5294.9	7002	3781.9	4897.9	3502.3	4422.8	8654.6	7695.3	5724.6	6927.8	5908.8	11992	6033.6	7409.6	7100.9	8423.2		1.02887	1.07984	1.11471	0.885112	1.01634	1.02497
759	759	559	Q9CRA9	FGFR1 oncogene partner 2 homolog OS=Mus musculus OX=10090 GN=Fgfr1op2 PE=1 SV=1	Fgfr1op2	29.4	5.83	1864	39	90	11	0	624.1	374.8	267.3	331.6	338.3	735.2	400.5	373.1	439.7	461.8	759.5	672.5	430.1	570.5	578.6	617	342.9	328.2	316.1	272.7	864.2	508.3	331.4	502	636	591	382.7	321.2	417	525.3		0.860895	0.955556	0.803863	0.948374	1.13751	0.941239
760	760	4558	Q9DCT8	Cysteine-rich protein 2 OS=Mus musculus OX=10090 GN=Crip2 PE=1 SV=1	Crip2	22.7	8.63	4320	42	169	7	0	4273.2	3912	3074.6	5681	4651.9	2726.3	5631.4	2112.3	3610.3	3826.2	2607.9	1848.2	1650.1	3356.8	1320.3	4686.8	4039.1	3224.8	7644.3	6068.7	2291.3	2711.2	1134.9	4197.8	1510.7	3195.9	4046.6	2215.7	4569.5	3388.9		1.04895	0.718578	1.17225	1.26568	0.885709	1.01823
761	761	2712	Q8K2K6	Arf-GAP domain and FG repeat-containing protein 1 OS=Mus musculus OX=10090 GN=Agfg1 PE=1 SV=2	Agfg1	58	8.63	3974	22	149	10	0	999	578.2	1136.6	984.9	1709.3	947.9	687.9	985.2	725.4	1533.8	764.7	676.9	871.4	936	786.4	949.8	726.9	1335.8	1001.3	2055.9	965.7	634.7	534.8	728.6	893.1	1214.5	700.4	1323.4	796.2	1361.8		1.34328	1.01817	1.28125	1.0976	0.88786	1.12563
762	762	483	Q9CPY7	Cytosol aminopeptidase OS=Mus musculus OX=10090 GN=Lap3 PE=1 SV=3	Lap3	56.1	7.72	1882	41	82	15	0	523.5	13.1	603.1	73.5	193.5	482	19.5	692.6	85.4	195.5	417.2	34	722.6	82.2	387	396.1	11.2	634.7	108	124.7	458.1	50.3	1564.1	88.7	399.5	621.3	20.9	794.7	89.1	174.8		1.14742	1.07179	1.289	1.04333	0.894118	1.08913
763	763	2237	Q9QWK4	CD5 antigen-like OS=Mus musculus OX=10090 GN=Cd5l PE=1 SV=3	Cd5l	38.8	5.16	3637	39	176	13	0	3629.5	2282.8	2288.8	2222.7	1842.3	2625.3	1751.3	2473.5	2585.7	2602.9	1882.5	1560.7	1704.4	1542	1148	3051.5	1600.7	2335.7	2400.7	2200.1	1776.1	1406.2	715.5	2066	1570	2648.9	1954.7	2053.9	2360.4	2814.6		0.830362	1.11614	1.00899	0.912867	1.08133	0.989939
764	764	646	Q3U7R1	Extended synaptotagmin-1 OS=Mus musculus OX=10090 GN=Esyt1 PE=1 SV=2	Esyt1	121.5	5.95	950	22	68	18	0	67.3		771.3		31.9	128.8		841.4		36.6	147.4		708.2		64.4	106.7		843.1		28.5	191.6		1846.2		71	104.6		670		36.3		0.796292	NA	0.812112	NA	0.991803	0.866736
765	765	777	Q9QYY0	GRB2-associated-binding protein 1 OS=Mus musculus OX=10090 GN=Gab1 PE=1 SV=2	Gab1	76.8	5.67	837	24	52	12	0	133		26.1	174.2	361.5	124.1		29.6	126	173	63.6		26.4	131.9	123.3	92.8		18.2	173.8	287.8	80.3		23	103	113.9	198.6		25.5	124.4	202.4		0.861486	NA	1.60032	0.987302	1.16994	1.15476
766	766	3975	O88811	Signal transducing adapter molecule 2 OS=Mus musculus OX=10090 GN=Stam2 PE=1 SV=1	Stam2	57.4	5.07	1004	33	108	15	1	1163.7	663.1	444.5	918.9	166.8	922.9	813.2	538.5	1411.2	287.9	872.8	1195	611.7	1747.8	285.6	567.8	603.9	443.6	939.2	164.6	791.6	1032.6	387.6	2008.2	326.3	1314.2	669.7	430.8	1189.7	262.1		0.8	0.823537	1.42399	0.843041	0.910386	0.960191
767	767	3948	Q7TSI3	Serine/threonine-protein phosphatase 6 regulatory subunit 1 OS=Mus musculus OX=10090 GN=Ppp6r1 PE=1 SV=1	Ppp6r1	94.5	4.64	2801	21	124	11	0	1006.1	705.5	994.2	653.8	1126.7	1028.4	799.1	825.8	745.9	1140.6	1147	1001.9	935	750.4	1084.7	946	803.3	1058.9	666.4	1080.4	1375.1	914.6	575.9	713.3	1010.9	1344.4	808.1	1087.7	770.9	1218.6		1.31715	1.01126	1.30727	1.03352	1.06839	1.14752
768	768	611	O35643	AP-1 complex subunit beta-1 OS=Mus musculus OX=10090 GN=Ap1b1 PE=1 SV=2	Ap1b1	103.9	5.17	1041	23	78	16	0	25.8	52.9	21.4		7.7	48	65	31.7		25.1	81.9	123.2	40.4		124.9	40.3	21.7	23		12	107.4	181.5	158.8		114.7	31.9	26.3	18.6		19.1		0.586751	0.404615	0.664583	NA	0.760956	0.604226
769	769	2463	Q9JHS9	Spliceosome-associated protein CWC15 homolog OS=Mus musculus OX=10090 GN=Cwc15 PE=1 SV=1	Cwc15	26.6	5.71	5920	48	280	12	0	7356.4	9764.7	11245.2	14014.3	12046.6	5878.7	9477.2	8738.2	11642.1	9066.1	5139.9	8811.1	8619.4	10054.5	5021.5	7383.1	11857.9	12492.5	12122.7	12663.6	3680	7274.1	2135.6	11038.6	5868.7	5418	10286.9	10840.5	11441.1	10659.7	Acetyl [N-Term]	1.24059	1.08544	0.921632	0.982735	1.17578	1.08123
770	770	37	Q9CQ19	Myosin regulatory light polypeptide 9 OS=Mus musculus OX=10090 GN=Myl9 PE=1 SV=3	Myl9	19.8	4.92	6554	62	296	8	0	1091.9	1048.6	1069.7	101.1	441	1069.2	970.4	1597.9	155.9	862.8	1541.3	1434.2	2051.7	187.8	1875.5	877.4	889.6	943.5	82.6	476.8	1863.7	1606.7	2147	220.4	1230.4	1258.9	1276.2	1247.4	159.3	770.3		0.78065	1.31513	1.17742	1.02181	0.892791	1.03756
771	771	2658	P80316	T-complex protein 1 subunit epsilon OS=Mus musculus OX=10090 GN=Cct5 PE=1 SV=1	Cct5	59.6	6.02	1551	37	111	16	0	298.2	527.7	1072.6	146.5	328.1	447.5	583	1371.3	159.1	581.9	790.8	828	1740.9	166.5	1943.5	463	323.1	1227.7	105	359.6	694	1274.6	4779.2	224.8	1881	398.5	391.8	722.7	139.5	478.8	Acetyl [N-Term]	0.527018	0.672041	0.890503	0.876807	0.822822	0.757838
772	772	670	P09528	Ferritin heavy chain OS=Mus musculus OX=10090 GN=Fth1 PE=1 SV=2	Fth1	21.1	5.88	2056	60	128	12	0	1625.2	1347.3	1156	516.9	1090.9	2253.9	1954.1	1086.3	570	987	1743.5	1748.5	897.5	581.2	1064.4	1943.3	1536.7	1061	592.9	838.6	4272.1	1819	1721.9	559.4	1096.4	2101.4	1554.9	1249.4	549.3	884.5	Acetyl [N-Term]	1.15014	0.795712	0.93234	0.963684	0.89615	0.947606
773	773	2845	P56812	Programmed cell death protein 5 OS=Mus musculus OX=10090 GN=Pdcd5 PE=1 SV=3	Pdcd5	14.3	5.68	7263	74	389	11	0	12602.8	8270.9	11480.1	17006.1	15951.8	9852	8211.3	10119.7	13439.9	12472.9	7113.6	6908.8	8554	12804.7	6397.4	10724.2	9281.3	10732.2	18814.2	15900.4	6229.4	6261.8	2005.3	11815.9	6651.7	11043.2	9094.9	11514	14393.5	13093.2	Acetyl [N-Term]	1.13778	1.10761	1.12091	1.07095	1.04973	1.0974
774	774	1523	Q3UH68	LIM and calponin homology domains-containing protein 1 OS=Mus musculus OX=10090 GN=Limch1 PE=1 SV=2	Limch1	118.1	5.48	1006	24	66	18	0	218.1	71.4	57	56.5	82.8	300.5	160.8	45.6	43.8	94.3	251.1	131.1	47.2	62.9	76.9	238.9	95.1	54.8	54.4	65.7	335.5	141.9	116.4	43.4	62.7	267.8	103.7	50.5	68.5	70.7		1.10746	0.6449	0.891181	1.56393	0.749735	0.99144
775	775	3568	Q61129	Complement factor I OS=Mus musculus OX=10090 GN=Cfi PE=1 SV=3	Cfi	67.2	7.46	2428	28	158	14	0	5379.4	4424.9	5202.2	8557.4	7383.1	4433.9	3909.7	3777.5	4287.6	4094.8	3236	3552.2	3415.2	3534.9	2130.8	4724.6	4221.8	4210.3	5289.8	7595.8	3871.3	3555.2	1175.6	3050.3	2371	4854.1	4222	4109.3	3800.3	4002.1		1.08784	1.07988	1.09477	0.886347	0.977362	1.02524
776	776	1873	P14873	Microtubule-associated protein 1B OS=Mus musculus OX=10090 GN=Map1b PE=1 SV=2	Map1b	270.1	4.83	515	9	50	15	0	43.6	28.6	82.5		63.5	52	41.2	118.8		117.3	42	39.4	100.3		87.8	27.5	31.4	74.6		97.8	67.3	40.7	82.9		89.1	60	42.5	104.2		77.1		0.877104	1.03155	1.15385	NA	0.657289	0.929948
777	777	1099	Q9CPT5	Nucleolar protein 16 OS=Mus musculus OX=10090 GN=Nop16 PE=1 SV=1	Nop16	21.1	9.91	1534	61	133	12	0	2885.4	3004.8	7316	1354	869.7	2513.3	2538	5877.1	1599.7	1020.6	2637.8	1680.1	5935.1	1397.1	729.7	5390	2959.4	7855.8	1602.6	1161.4	1224.9	2076.1	1053.6	1818.1	782.6	1950.5	2441.9	5505.1	1501.4	990.3		0.936703	0.962136	0.776071	0.938551	0.970312	0.916755
778	778	1050	P46938	Transcriptional coactivator YAP1 OS=Mus musculus OX=10090 GN=Yap1 PE=1 SV=2	Yap1	52.4	5.11	1722	36	101	10	0	307	544.9	369.2	424.4	553.7	386.1	653.5	407.4	463.2	652.6	357.5	620.9	389.1	601.8	646.6	303.9	596.1	401.4	445.6	537.4	487.4	606.8	252.1	512.9	673.1	329.2	785.4	415.8	462.4	591.8		1.02062	1.20184	0.852629	0.998273	0.906834	0.996038
779	779	157	P24063	Integrin alpha-L OS=Mus musculus OX=10090 GN=Itgal PE=1 SV=2	Itgal	128.2	6.11	1150	17	74	17	0	429.2	326.6	609.4		152	685	373.3	941.5		207.2	794.1	323.6	1021.4		381	410.8	334.5	858.3		100.2	1348.5	358.6	1845.9		383.5	568.4	390.2	850.5		189.2		0.903346	1.04527	0.829781	NA	0.913127	0.922882
780	780	454	Q61753	D-3-phosphoglycerate dehydrogenase OS=Mus musculus OX=10090 GN=Phgdh PE=1 SV=3	Phgdh	56.5	6.54	2479	25	93	11	0	838.5	242.5	828.1	110.3	273.3	940.2	292.2	937.8	106.3	484.6	1310.1	290.2	950.5	72.5	839	934.6	210.3	956.1	89.2	455.5	752.7	368.9	2465	103.3	809.4	837	195	615.6	63.3	377.4		0.65643	0.667351	0.890236	0.595484	0.778787	0.717658
781	781	2014	E9Q784	Zinc finger CCCH domain-containing protein 13 OS=Mus musculus OX=10090 GN=Zc3h13 PE=1 SV=1	Zc3h13	203.6	9.38	1608	9	112	19	0	1092.8	1092.1	454.5	386.6	1061	1105.8	1096.3	487.9	481.6	1097.1	1010.9	979.5	436.5	411.1	690.5	1065.5	872.9	456.9	369.3	820.7	733.3	1031.2	214.8	400.5	668.7	1242.4	1077.1	451.3	448.5	1065.8		0.924985	0.982487	1.12353	0.931271	0.97147	0.986749
782	782	2533	Q9QUR7	Peptidyl-prolyl cis-trans isomerase NIMA-interacting 1 OS=Mus musculus OX=10090 GN=Pin1 PE=1 SV=1	Pin1	18.4	8.79	2351	64	122	9	0	1478.9	998.8	776.4	1721.8	1235.7	1038.6	1142.7	512.3	1156.8	1018.1	960	637	518.8	1210.7	479.1	1413.7	1063	790.5	1849.5	1434.8	768	691.1	427.7	1246.5	510.6	1223.2	960	581.7	1351.5	1087.1	Acetyl [N-Term]	1.13547	0.840116	1.17774	1.16831	1.06777	1.07788
783	783	4594	P24547	Inosine-5'-monophosphate dehydrogenase 2 OS=Mus musculus OX=10090 GN=Impdh2 PE=1 SV=2	Impdh2	55.8	7.28	1508	29	80	13	1	408.3	150.9	564.3	124	392.6	473.5	140.9	535.8	136.2	627.9	583.4	159.7	626	96.3	920.8	461.4	82.3	625.8	272.9	392.2	331.8	248.2	1129.2	153.3	872.9	766.4	99.8	506.5	100	454.9		0.945315	0.708304	1.61859	0.734214	0.724478	0.946179
784	784	740	Q8BHJ9	Pre-mRNA-splicing factor SLU7 OS=Mus musculus OX=10090 GN=Slu7 PE=1 SV=1	Slu7	68	7.08	820	35	70	18	0	486.3	313.9	108.8	268.2	448.2	472.6	339.5	182.5	342.3	492.7	442.1	466.2	208.5	309.5	392.2	361.6	411.9	151.1	199.5	447.8	424.3	410.5	103.9	354	425.9	566.9	460.9	142.9	260.4	466.5	Acetyl [N-Term; N-Term]	0.783014	1.35758	1.19953	0.760736	0.946824	1.00954
785	785	4624	Q9JL19	Nuclear receptor coactivator 6 OS=Mus musculus OX=10090 GN=Ncoa6 PE=1 SV=1	Ncoa6	219.5	9.32	1807	12	89	15	0	617.1	577.2	489.3	1449.8	493.4	610.9	689.9	635.3	1178.4	470.8	567.9	601.6	483.8	1472.6	267.8	419.1	652.6	483.2	1523.5	503	683.9	576.2	224.1	1100.1	305.1	636.8	625.3	558	1236.1	446.8		0.878325	0.906363	1.0424	1.04896	0.949023	0.965015
786	786	2756	P14869	60S acidic ribosomal protein P0 OS=Mus musculus OX=10090 GN=Rplp0 PE=1 SV=3	Rplp0	34.2	6.25	2540	41	133	9	0	1070.5	1166.5	2186.7	1106.5	641.7	2440.1	1055.1	2845	1203	1565.9	4835.1	1893.1	3440.4	919.9	8263.7	2091.3	335.5	2474.3	603.1	825.9	3234.1	3078.7	8908.2	1499.4	7249.2	2156.8	644.1	1357.5	788.6	1228		0.477153	0.610463	0.883898	0.655528	0.784214	0.682251
787	787	4655	Q9ESY9	Gamma-interferon-inducible lysosomal thiol reductase OS=Mus musculus OX=10090 GN=Ifi30 PE=1 SV=3	Ifi30	27.8	5.01	1755	29	123	7	0	351.5		567.5	114.6	358.3	412.1		819.4	127.3	461.9	497		897.2	146.1	1068.4	467.4		642.1	103.1	370.2	576.3		1280.4	145.2	867.1	415.9		580.1	105.2	407.6		0.707957	NA	1.00922	0.826394	0.882442	0.856504
788	788	4430	P62627	Dynein light chain roadblock-type 1 OS=Mus musculus OX=10090 GN=Dynlrb1 PE=1 SV=3	Dynlrb1	11	7.25	2909	83	195	7	0	1992.5	1691.2	2370.2	2865.3	2537.1	2017.1	1813.2	2799.6	3071.6	3011.5	1592.8	2025.7	2900.8	3327.9	2021.3	2355.3	1497.8	2336.3	3173.1	2445	1409.3	1935.8	907.5	3560.1	2420.2	1948.3	1658.6	2379.5	3127.1	2772.3	Acetyl [N-Term]	0.849943	0.914736	0.965892	1.01807	0.920571	0.933842
789	789	472	Q9JHL1	Na(+)/H(+) exchange regulatory cofactor NHE-RF2 OS=Mus musculus OX=10090 GN=Slc9a3r2 PE=1 SV=2	Slc9a3r2	37.4	7.59	1828	45	106	15	0	1116	344.8	573.2	1462.7	977.5	950.2	418.6	578.8	1587.4	1381.9	922.7	447.1	599.6	1964.1	1031.4	867.5	260.9	712.1	1475.6	1051.3	1221.9	414.1	786.8	1842.5	1360.3	1103.6	351.9	573.8	1520.3	1188.8		0.991361	0.840659	1.16144	0.95773	0.860265	0.962291
790	790	4006	Q5SFM8	RNA-binding protein 27 OS=Mus musculus OX=10090 GN=Rbm27 PE=1 SV=3	Rbm27	118.5	9.19	1464	16	122	15	0	732.5	581.6	320.1	303.4	681.2	1044.7	687.7	365.8	452.8	954.3	907	568	335.9	401.3	705	817	484	352.7	329.5	676.5	966.4	614.6	299.9	389.6	641.2	911.8	600.8	376.9	469.4	884.5		1.03034	0.873637	0.872786	1.03666	0.926857	0.948057
791	791	1170	Q60932	Voltage-dependent anion-selective channel protein 1 OS=Mus musculus OX=10090 GN=Vdac1 PE=1 SV=3	Vdac1	32.3	8.43	1743	46	87	10	1	456	240.8	622.2	234.5	192	705.5	507.8	1005.5	449.1	304	575.2	389	887.8	302	324.6	444.8	247.9	654.5	229.4	208.2	540.4	573.9	1689.8	386.8	353.3	382.9	266.7	768.1	194.1	204.9		0.763899	0.525207	0.542736	0.432198	0.674013	0.58761
792	792	2724	P14483	H-2 class II histocompatibility antigen, A beta chain OS=Mus musculus OX=10090 GN=H2-Ab1 PE=1 SV=1	H2-Ab1	30.1	7.24	3084	50	143	11	0	1842	1647	2061.4	268	650.8	3531.3	3002.1	4063.2	598.3	1349.2	3847	3444.1	3620.1	488	2329.8	1920.5	952.1	3178.7	196	564.3	5585.8	3258.6	6671.7	672.1	2786.3	2765.6	2154.1	3940.7	580.6	1365.3		0.969851	0.717531	0.783168	0.970416	1.01193	0.89058
793	793	1958	Q07797	Galectin-3-binding protein OS=Mus musculus OX=10090 GN=Lgals3bp PE=1 SV=1	Lgals3bp	64.5	5.14	2859	18	110	8	0	642.6	671.5	535.6	780	737.1	1120.6	992.1	914.4	1480.1	789	507.4	811	696.8	1325.7	554.9	600.1	658.2	652.7	1146.6	522.4	802.4	884.5	595.1	1251.8	649.5	876.5	963.2	668.4	1235.1	688.4		0.730971	0.97087	0.78217	0.834471	0.872497	0.838196
794	794	205	P84086	Complexin-2 OS=Mus musculus OX=10090 GN=Cplx2 PE=1 SV=1	Cplx2	15.4	5.08	2420	54	171	7	0	2993.8	3484.7	2430.8	3225.8	3634.6	2029.6	2085.4	1443.8	2036.8	2266.3	1769.4	1663.7	1581.3	2655.9	1199.3	3244	5103.9	2137.8	2992.2	3535.5	580.7	1763.7	183.3	1625.8	1209.5	1552.2	2214.4	1623.1	2229.6	2493.4		1.12419	1.06186	0.764781	1.09466	1.10021	1.02914
795	795	2818	Q8K4P0	pre-mRNA 3' end processing protein WDR33 OS=Mus musculus OX=10090 GN=Wdr33 PE=1 SV=1	Wdr33	145.2	9.13	1822	16	115	17	0	962.7	666.8	454.5	707.3	620.9	905.6	1126.9	524.8	902.9	914.7	667.6	842.7	345.7	734.3	366.3	825.7	748.9	542.9	949.6	671.8	677.5	673.5	160.3	567.5	409.3	1182.2	1080.7	625.2	911.9	931.8		1.19131	0.959003	1.30543	1.00997	1.01869	1.09688
796	796	3447	Q921F2	TAR DNA-binding protein 43 OS=Mus musculus OX=10090 GN=Tardbp PE=1 SV=1	Tardbp	44.5	6.7	970	46	75	12	0	77.7	112.1	205.1		68.4	134	75.4	211.1		76.2	259.7	116.7	270.3		137.8	146.5	123	348.1		51.9	308.4	135.3	1522.2		138.5	129	98.5	148.7		71		0.704405	1.30637	0.962687	NA	0.931759	0.976304
797	797	2459	P60335	Poly(rC)-binding protein 1 OS=Mus musculus OX=10090 GN=Pcbp1 PE=1 SV=1	Pcbp1	37.5	7.09	2927	49	134	11	5	1037.3	1053	1142.9	1059.1	1243.6	1712.3	1232.4	1436.8	1144.3	1811.4	2717.7	1745.3	1687	1059.1	4027.2	1635.1	594.5	1236	978.5	1528.8	2469.8	2287.5	4596.5	1553.7	3987.6	1602.6	841.7	936.8	882.9	1442.2		0.652004	0.682976	0.935934	0.771563	0.79618	0.767732
798	798	2484	Q9CRB6	Tubulin polymerization-promoting protein family member 3 OS=Mus musculus OX=10090 GN=Tppp3 PE=1 SV=1	Tppp3	19	9.11	4665	57	212	13	0	3096	2637.1	3014.7	1916.5	2245.5	3596.8	2928.7	3661.8	2760.5	4227	1766.8	1218.1	1256.2	1129.3	1121	2778.2	2702.2	3119.5	1662.2	2539.4	2513.7	1385.4	948.8	1076.1	1191.3	3585.9	3269.8	4026.2	3640.9	4018.1	Acetyl [N-Term]	1.09951	1.11647	0.99697	1.31893	0.95058	1.09649
799	799	3800	Q8K0E8	Fibrinogen beta chain OS=Mus musculus OX=10090 GN=Fgb PE=1 SV=1	Fgb	54.7	7.08	820	40	69	13	0	632.7	97	550.8		65.7	539.5	83.1	588.8		81.6	591.9	96.1	832.5		389.9	534.1	69.6	431.9		47.8	707.9	164.8	5365.2		305.1	939.6	73.5	402.4		89.6		0.683424	0.884477	1.74161	NA	1.09804	1.10189
800	800	3442	P53564	Homeobox protein cut-like 1 OS=Mus musculus OX=10090 GN=Cux1 PE=1 SV=3	Cux1	165.5	6.32	947	16	70	19	0	136.7	253.9		120.2	182.1	130.5	267.3		158.3	237	149.6	270.9		131.5	255.9	102.2	275.5		103.3	200.2	95.5	300.8		129.9	274.2	123	268.2		133	183		NA	1.00337	0.942529	0.840177	0.772152	0.889556
801	801	3758	O88487	Cytoplasmic dynein 1 intermediate chain 2 OS=Mus musculus OX=10090 GN=Dync1i2 PE=1 SV=1	Dync1i2	68.4	5.29	1123	33	63	12	0	118.4	75.8	388.6	48.2	410.9	165.3	87.9	433.9	63.8	447.5	184.8	143.5	515.4	58.8	627.6	113.8	81.7	413.6	55.6	322.2	246.1	166.4	985.7	66.2	671.7	164.2	92	361.7	40	415.3		0.833602	1.04664	0.993345	0.626959	0.928045	0.885719
802	802	1480	P17918	Proliferating cell nuclear antigen OS=Mus musculus OX=10090 GN=Pcna PE=1 SV=2	Pcna	28.8	4.77	2114	56	135	12	0	1557.9	1872	1501	1849.8	995.5	3633.8	3283.4	2462.9	2504.2	2139	3616.1	2980	2896.9	1744.1	4550.2	1988.7	1300.6	1776.6	1084.3	1394.2	1572.3	4967.6	2304	2428.1	3959.5	1877.9	1601	1198.6	2033.6	1155.1		0.486662	0.487604	0.516787	0.812076	0.540019	0.56863
803	803	1633	Q8BH50	Uncharacterized protein C18orf25 homolog OS=Mus musculus OX=10090 PE=1 SV=1	Q8BH50	26.4	5.19	1655	38	97	8	0	995.1	1391.1	679.9	668	379.5	883.3	1198.4	433.5	414.6	207.6	527.6	817.7	339.9	323	91.2	1255.1	1577.4	595.8	570.2	315.4	396	810.4	77.1	283.8	72	1072.7	1431.3	771.2	540.3	232.5		1.77901	1.19434	1.21442	1.30318	1.11994	1.32218
804	804	3249	Q60973	Histone-binding protein RBBP7 OS=Mus musculus OX=10090 GN=Rbbp7 PE=1 SV=1	Rbbp7	47.8	5.05	2608	40	141	12	0	145	21.2	305.3		481.8	266.6	22.7	500		803.7	524.6	53.9	837.6		2725.4	175.1		328.4		515.9	363	74.7	749		2588.1	157.3	24	248.1		770		0.4962	1.05727	0.590023	NA	0.958069	0.77539
805	805	161	Q8BL97	Serine/arginine-rich splicing factor 7 OS=Mus musculus OX=10090 GN=Srsf7 PE=1 SV=1	Srsf7	30.8	11.9	5701	30	324	11	1	8165.9	10310.9	9712.1	5829.3	6906	7451.3	9763.3	7990.7	5432.4	5818.6	6476.7	7057.8	7487.1	4999.6	4013.1	9230.9	11010.5	9251.8	5435.7	5751.6	3834.8	7519.7	2492.1	5536.8	3804.1	7368.2	9203.3	9679.8	5611.2	6579.4		1.21138	0.942642	0.988848	1.03291	1.13075	1.06131
806	806	972	P60122	RuvB-like 1 OS=Mus musculus OX=10090 GN=Ruvbl1 PE=1 SV=1	Ruvbl1	50.2	6.42	1266	37	84	12	0	193.7	145.1	434.9	196.2	191.2	375.4	138.4	580.4	237.9	271.2	629.5	153.6	640.3	255.4	702.3	263	114.3	475.7	176.7	194.8	485.5	142.8	1194.3	180.4	669.3	319.7	138.2	419.6	160.1	243.7		0.72295	0.998555	0.851625	0.672972	0.898599	0.82894
807	807	404	Q9Z1Z2	Serine-threonine kinase receptor-associated protein OS=Mus musculus OX=10090 GN=Strap PE=1 SV=2	Strap	38.4	5.12	883	50	56	11	0	113.8	52.5	180		30.4	190.8	80	200.4		68.7	299.7	101.6	255.6		161.9	180.3	29.8	222.7		59.5	237.2	133	605.3		160.9	165.6	62.3	157.4		55.5		0.785429	0.77875	0.867925	NA	0.80786	0.809991
808	808	3190	Q9DBP5	UMP-CMP kinase OS=Mus musculus OX=10090 GN=Cmpk1 PE=1 SV=1	Cmpk1	22.2	5.83	1638	49	117	8	0	1672.7	481.2	1444	1631.5	1573.4	2354.6	505.3	2694.2	2236.2	2556.8	3152.9	814.8	3431.2	2512	4916.5	1599.1	333.3	1821.2	1553.9	1495.6	4065.1	746.2	3981.4	2810.2	5553.1	1760.7	382.1	1692.4	2250.5	2613.2		0.628164	0.756184	0.74777	1.00639	1.02206	0.832115
809	809	2801	A2RTL5	Arginine/serine-rich coiled-coil protein 2 OS=Mus musculus OX=10090 GN=Rsrc2 PE=2 SV=1	Rsrc2	43.9	11.46	2788	32	141	11	0	1181	1826.5	723.6	2223.7	1232	1196	1967.2	655.6	2242.3	1160	973.6	1661.2	646.7	2022.1	611.6	1221.6	1904.5	766.9	2191.4	1123.2	692.3	1599.3	170.5	1772.9	669.9	1090.5	1951.9	823.9	2281	1237.1		1.25671	0.992222	0.911789	1.01726	1.06647	1.04889
810	810	2760	Q9EPB4	Apoptosis-associated speck-like protein containing a CARD OS=Mus musculus OX=10090 GN=Pycard PE=1 SV=1	Pycard	21.4	5.43	1160	59	70	9	0	296.2	245.8	261.1		138.9	359.4	284.5	267		164.9	467.5	345.6	279.6		271.3	342.4	200.4	313.3		121.9	627.5	364.3	1471.9		292	345.5	226.8	236.9		149.9		0.887266	0.797188	0.961324	NA	0.909036	0.888704
811	811	1109	P70279	Surfeit locus protein 6 OS=Mus musculus OX=10090 GN=Surf6 PE=1 SV=1	Surf6	41.2	10.52	1723	41	119	18	0	610.2	4713.8	4821	41.1	185.3	757.8	4707.2	4235.1	72.1	214.2	1084.5	2168.6	3355	21.8	141.1	882.7	5898.2	4732.1	44.5	226.1	1719.7	2129.8	1801.4	41.2	149.2	751.6	4672.2	5170.4	65.3	196.2		1.22084	0.992565	0.991818	0.905687	0.915966	1.00538
812	812	2950	O70439	Syntaxin-7 OS=Mus musculus OX=10090 GN=Stx7 PE=1 SV=3	Stx7	29.8	5.78	4774	52	200	11	0	786.9	814.9	924.4	887.3	1332.5	1044.2	1065	1251.3	969.9	1855.4	890	1363.9	1214.7	1216.2	1187.2	813.2	927.8	1318.3	911.5	1481	1188.1	1273.7	913.7	1151.6	1566.4	826.5	964.5	1058.4	814.1	1427.9	Acetyl [N-Term]	0.84584	0.905634	0.791515	0.839365	0.769591	0.830389
813	813	1554	Q9WU42	Nuclear receptor corepressor 2 OS=Mus musculus OX=10090 GN=Ncor2 PE=1 SV=3	Ncor2	269.6	7.44	535	9	48	18	0	69.7	224.9	39.9	219	68.2	95.9	211.1	48.6	239.5	65	61.1	240.7	49.7	275.4	39	83.6	238.3	36.7	239.3	51.2	78.3	228.1	38.3	241.9	59.1	74.3	193.9	65.1	233.8	61.3		1.33951	0.918522	0.774765	0.9762	0.943077	0.990414
814	814	723	Q9QY93	dCTP pyrophosphatase 1 OS=Mus musculus OX=10090 GN=Dctpp1 PE=1 SV=1	Dctpp1	18.8	5.03	3964	59	159	10	0	4625.5	5076.5	2920.2	939.5	2419.5	2804.9	2913.5	1745.6	1080.5	1952.6	2487.5	2443.9	1642.7	977.9	1431.8	4133.7	6684.1	2317.4	1103.6	2009.4	1252.7	2834.6	444.7	918.7	1254.2	3673.6	3557	2827.7	1186.4	1933.6		1.6199	1.22087	1.30971	1.09801	0.990269	1.24775
815	815	2135	Q9JIH2	Nuclear pore complex protein Nup50 OS=Mus musculus OX=10090 GN=Nup50 PE=1 SV=3	Nup50	49.5	6.24	2394	36	119	14	0	1822.2	1106.2	1219.8	932.1	1287.1	2201.4	1162.7	1372.8	1012.1	1529.3	2628	1212.2	1499.8	942.1	1594.3	1693.5	990.9	1571.1	895.7	1332.8	2342	1358.2	1102.6	1206.9	1594.8	1655.4	965.2	1205.6	818.1	1318		0.878205	0.830137	0.751976	0.808319	0.861832	0.826094
816	816	3664	P18242	Cathepsin D OS=Mus musculus OX=10090 GN=Ctsd PE=1 SV=1	Ctsd	44.9	7.15	2061	28	141	9	0	1033.6	742.2	1143.8	1509.3	961.7	1618.8	1197.1	2316.8	2003.4	1693.3	1770.8	1174.6	2019.6	1404.1	3288.8	1335	597.3	1812.7	1543.8	1079	3305	1709.3	6389.8	2168.7	4250.5	1731.9	633.9	1089.7	1357.2	1171.8		0.470347	0.52953	1.06987	0.677448	0.692021	0.687843
817	817	3715	Q8BKC5	Importin-5 OS=Mus musculus OX=10090 GN=Ipo5 PE=1 SV=3	Ipo5	123.5	4.93	414	29	48	21	0	66.5	37.7	265.5	38.8	15.1	66.6	34.9	309.8	41.6	16.4	76.2	44.9	354.8	44.4	49.7	52.3	58.7	252	39.3	12.6	56.9	44.6	657.1	44	47.6	95.5	27.6	226.2	46.7	17.4	Acetyl [N-Term]	0.730148	0.790831	1.43393	1.1226	1.06098	1.0277
818	818	1920	Q99JI6	Ras-related protein Rap-1b OS=Mus musculus OX=10090 GN=Rap1b PE=1 SV=2	Rap1b	20.8	5.78	2349	53	109	8	0	440.2	28	258		54.9	596.8	29.4	394.4		109.1	602.5	29.2	371.6		258.4	499.4	8.1	360.4		77.7	1048.2	40.2	1455.7		236.3	519.5	16.4	293.3		89.3		0.743661	0.557823	0.870476	NA	0.818515	0.747619
819	819	274	Q6P9Q4	FH1/FH2 domain-containing protein 1 OS=Mus musculus OX=10090 GN=Fhod1 PE=1 SV=3	Fhod1	129.5	6.28	1393	12	74	10	0	831.7	97	248.5	127.5	163.6	629.3	109.2	309.2	108.7	240.7	523.8	152.1	305.4	166.3	295.6	1107.3	99.1	313.9	172.5	163.7	851.2	123.4	356.9	123.6	342.4	994.8	104.5	236.7	119.9	250.2		0.765524	0.95696	1.5808	1.10304	1.03947	1.08916
820	820	522	P60898	DNA-directed RNA polymerase II subunit RPB9 OS=Mus musculus OX=10090 GN=Polr2i PE=1 SV=1	Polr2i	14.5	5.14	5388	79	240	7	0	4545.8	3359.4	3279.6	3932.6	4567.6	3657.8	3412.5	3021.4	3655.4	4267.8	3178.5	2836	2973.1	3838.5	2800.9	4226.1	2981.4	3297.7	4264.6	4354	2421.1	2615	1768.6	3958.7	3057.2	3561.8	3089.1	2881	4014.5	4683.5	Acetyl [N-Term]	0.953531	0.905231	0.973755	1.09824	1.0974	1.00563
821	821	1961	P29391	Ferritin light chain 1 OS=Mus musculus OX=10090 GN=Ftl1 PE=1 SV=2	Ftl1	20.8	6	3274	58	92	8	0	493.8	297.7	558.1	174.9	462.8	711.2	558.3	561.3	323.6	720.8	730.3	444.8	712.8	495.4	1426.7	552.9	294.2	516.2	258.3	549	2484.9	417.5	2100.1	418	1370.8	616.6	466.6	637.3	271.3	627.4	Acetyl [N-Term]	1.1354	0.835751	0.866985	0.838381	0.870422	0.909388
822	822	1041	P70445	Eukaryotic translation initiation factor 4E-binding protein 2 OS=Mus musculus OX=10090 GN=Eif4ebp2 PE=1 SV=1	Eif4ebp2	12.9	6.52	5038	85	210	7	0	2806.1	2373.4	2223.8	1728.6	2167.7	2148.9	1822.7	1229.5	1409.6	1735.5	1852.8	1381.5	1306.1	1358.1	1090.7	3169.6	3316.6	2079.7	1612.5	2347.2	1305.8	1501.3	279	1472.8	1062.9	2253.3	1796	1962.2	1460.2	1899.5	Acetyl [N-Term]	1.59593	0.985351	1.04858	1.0359	1.0945	1.15205
823	823	3115	Q9CZN7	Serine hydroxymethyltransferase, mitochondrial OS=Mus musculus OX=10090 GN=Shmt2 PE=1 SV=1	Shmt2	55.7	8.47	1015	34	81	13	0	101.3	241.1	964.6		639.2	157.5	242.1	910.6		548	237.5	321.9	979.8		1064.8	173.8	188.9	1175.4		359.7	118.9	338.2	1154.3		1001.4	130.3	199.4	806.8		485.9		0.886009	0.823627	0.827302	NA	0.886679	0.855904
824	824	3874	Q8CDN6	Thioredoxin-like protein 1 OS=Mus musculus OX=10090 GN=Txnl1 PE=1 SV=3	Txnl1	32.2	4.96	1700	41	76	6	0	310.6	380.5	773.9	110.8	113.9	663.6	493.1	1255	135.4	292.3	906.9	730.8	1264.7	125.6	1005.5	386	205.6	928.6	81.1	120.9	871.4	828.5	1829.4	228.2	884.6	514.7	339.4	777.9	122.9	258.4		0.619841	0.688299	0.775618	0.907681	0.884023	0.775092
825	825	2789	Q62504	Msx2-interacting protein OS=Mus musculus OX=10090 GN=Spen PE=1 SV=2	Spen	398.5	8.54	583	6	54	18	0	149.6	290.3	74.7	49.2	285.4	146.5	325	79.7	58.7	249.3	145.7	340.3	88.6	55.6	190.2	127.3	281.7	90.2	66	255.5	110.1	353.6	43.3	48.7	182.9	191.8	323.5	87	61.3	253.2		1.09159	0.995385	1.30922	1.04429	1.01564	1.09123
826	826	4258	P97314	Cysteine and glycine-rich protein 2 OS=Mus musculus OX=10090 GN=Csrp2 PE=1 SV=3	Csrp2	20.9	8.62	5224	46	178	9	0	3548	1891.9	3542.8	2816.9	3033.2	2050.4	2863.3	3426.3	2519.5	4245.5	1938.3	1020.2	2728.7	2097.6	1695.3	3546.6	1911.9	3884.3	3889.6	4845.1	1693.8	1387.7	1533.4	2975.4	1643.4	2731.2	1891.4	2686.3	2923.4	3285.4		0.784024	0.660566	1.33203	1.16031	0.773855	0.942157
827	827	2262	Q9WUU8	TNFAIP3-interacting protein 1 OS=Mus musculus OX=10090 GN=Tnip1 PE=1 SV=1	Tnip1	73	6.05	1223	31	87	13	0	214.9	382.5	261.1	609.7	585.1	225.4	470.2	285.4	707.8	606.3	188.3	501.7	301.2	805.9	405.5	194.4	382.7	265.5	748.9	603	217.3	463.5	193.6	661.5	423.1	165.1	435.6	298.2	678.8	618.1		1.04485	0.926414	0.732476	0.959028	1.01946	0.936446
828	828	866	P62075	Mitochondrial import inner membrane translocase subunit Tim13 OS=Mus musculus OX=10090 GN=Timm13 PE=1 SV=1	Timm13	10.5	8.18	4705	71	135	7	0	1431	1283	1093.9	936.7	1973.7	1228.6	1331.9	981.1	906.7	1964.7	1449	1268	1090.8	918.5	1719.4	1739.1	1106.5	1165.1	1343.8	2256.9	887.7	1396.9	337.2	1182.8	1813.4	1138.7	921.5	765.8	744.9	1732	Acetyl [N-Term]	0.780552	0.691869	0.926827	0.821551	0.88156	0.820472
829	829	888	P46638	Ras-related protein Rab-11B OS=Mus musculus OX=10090 GN=Rab11b PE=1 SV=3	Rab11b	24.5	5.94	2295	65	118	14	0	655.3	603.8	933.2	245.9	161.8	1063.6	764.2	1079.2	270.4	195.4	1079.7	728.7	1064.7	205.3	437	844.7	405.4	985.1	154.5	149.4	1669.2	928.1	4128.2	259.4	441.6	939.3	565.6	1145.6	222.9	174.3	Acetyl [N-Term]	1.06153	0.74012	0.883133	0.824334	0.892016	0.880226
830	830	207	Q64737	Trifunctional purine biosynthetic protein adenosine-3 OS=Mus musculus OX=10090 GN=Gart PE=1 SV=3	Gart	107.4	6.68	607	27	61	18	0	20.7		113.6	67.4	14.3	33.3		129.3	70.7	36.3	57.7		138	58.4	140.2	36.5		116.2	53.1	27.3	28.3		246.2	49	120	33		102.6	78.2	27.9		0.793503	NA	0.990991	1.10608	0.768595	0.914793
831	831	4097	P46460	Vesicle-fusing ATPase OS=Mus musculus OX=10090 GN=Nsf PE=1 SV=2	Nsf	82.6	6.95	878	24	55	17	1	55		344.1		37.3	71.5		461.4		38.9	78.6		389.8		58	65.8		430.6		39.4	92.3		1196.3		58.3	80.9		370.2		46.1		0.802341	NA	1.13147	NA	1.18509	1.03963
832	832	1748	Q9R059	Four and a half LIM domains protein 3 OS=Mus musculus OX=10090 GN=Fhl3 PE=1 SV=2	Fhl3	31.8	6.2	2111	58	137	13	0	1316.2	1483	1357.1	664.9	881.1	1590.5	2031.8	1949.1	1026.3	1400	1673.7	2277.1	2068.3	1234.5	1275.1	1208.6	1496	1554.8	759.5	923.4	2366.2	1845.5	825.2	1295.8	1395.8	1518.1	1887.2	1712.3	957.1	1249.7	Acetyl [N-Term]	0.878508	0.928832	0.95448	0.932573	0.892643	0.917407
833	833	1730	Q7TT18	Activating transcription factor 7-interacting protein 1 OS=Mus musculus OX=10090 GN=Atf7ip PE=1 SV=1	Atf7ip	138.5	4.77	1657	14	63	12	0	238.3	393.3	165.4	849.5	347.2	239.5	527.3	188.1	909.9	336.6	212.7	531.1	178.1	722.5	188.6	239.8	570.6	188.2	935	391.4	158.3	536.2	44.5	624	222.8	266.6	560.2	178.6	870	295.3		0.949495	1.06239	1.11315	0.956149	0.877302	0.991698
834	834	1979	Q6A0A2	La-related protein 4B OS=Mus musculus OX=10090 GN=Larp4b PE=1 SV=2	Larp4b	81.6	7.49	1776	21	126	14	0	801.9	1920.5	779.2	849	1539.6	789.3	2002.5	761.1	933.4	1542.5	636.2	1647.4	723.2	739.2	781	861.5	2076.9	778.2	864.1	1568.2	599	1889.6	312	649	888.5	1038.6	2102.8	865.8	769.4	1428.7		1.13756	1.05009	1.31585	0.824298	0.926224	1.0508
835	835	1820	Q8BK67	Protein RCC2 OS=Mus musculus OX=10090 GN=Rcc2 PE=1 SV=1	Rcc2	55.9	8.72	1876	34	108	15	0	618	339.8	1290.2	326.8	448	1121.4	383.5	1359.6	336.4	651.1	2181	525.4	1651.6	381.6	2470.1	1132.6	309.7	1312.8	287.9	512.1	1579	753	4910.8	376.2	2053.6	953	370.4	896.6	330.6	575.5		0.659459	0.965841	0.849831	0.982759	0.883889	0.868356
836	836	3999	Q8K0V4	CCR4-NOT transcription complex subunit 3 OS=Mus musculus OX=10090 GN=Cnot3 PE=1 SV=1	Cnot3	81.9	6.2	1638	23	115	14	0	1314.3	854.3	568.2	921	1470.4	1356.7	919.6	591.3	969.4	1732.4	1151.8	1110.4	600.8	1244.3	1262.4	1165.9	838.4	615.1	845.1	1268.8	897.7	946.4	293.5	1053.3	1368.2	1345.4	897.2	613.6	941.2	1638.8		1.03771	0.975642	0.991671	0.97091	0.945971	0.984381
837	837	1053	Q9JJW6	Aly/REF export factor 2 OS=Mus musculus OX=10090 GN=Alyref2 PE=1 SV=1	Alyref2	23.7	10.04	4062	33	182	6	0	53.1	285.6	157.2	37.3		64.8	296.5	132.1	27.2		63.7	228.5	117.4	37		72.2	309.7	155.5	31.9		60.8	240.4	65.3	30		33.8	322.7	179.9	32.8		Acetyl [N-Term]	1.36185	1.08836	0.521605	1.20588	NA	1.04442
838	838	2573	Q9D8L5	Coiled-coil domain-containing protein 91 OS=Mus musculus OX=10090 GN=Ccdc91 PE=1 SV=2	Ccdc91	50	5.07	845	36	69	17	0	550.6	543.9	264.3	25.6	326.9	626.3	590.5	297.8	29.1	425	489.3	492.3	247.5	24	356.9	589.8	531.5	248.5	25.2	338.2	518	424.2	118.2	22.8	409.7	558	572.9	302.5	24.6	422.4		1.01578	0.970195	0.890947	0.845361	0.993882	0.943233
839	839	4551	Q7TPV4	Myb-binding protein 1A OS=Mus musculus OX=10090 GN=Mybbp1a PE=1 SV=2	Mybbp1a	151.9	8.95	1038	15	82	15	0	379	492.3	589.2	692.8	594.5	424.4	632.2	513.1	650.4	785.1	426	557.1	521.6	706.8	690.5	504.8	514.4	726.3	780.3	679.4	179.6	658.7	350	598.1	706.6	359.1	511.7	522.4	556	655.7		1.01813	0.809396	0.846136	0.854859	0.83518	0.872739
840	840	1005	P99029	Peroxiredoxin-5, mitochondrial OS=Mus musculus OX=10090 GN=Prdx5 PE=1 SV=2	Prdx5	21.9	8.85	2392	47	151	9	0	557.9	532.1	869	1270.5	1059	784	687.9	1175.4	1378.1	1322.8	1222.4	1124.5	1414.6	1611.2	3730	614.1	411.9	1068.8	1222.7	1040.5	2408	1187.5	10451	1687.3	4399.5	742.2	594.1	941.1	1116.2	1174.5		0.800664	0.863643	0.946684	0.809956	0.887889	0.861767
841	841	2147	Q9CXZ1	NADH dehydrogenase [ubiquinone] iron-sulfur protein 4, mitochondrial OS=Mus musculus OX=10090 GN=Ndufs4 PE=1 SV=3	Ndufs4	19.8	9.99	2547	38	121	8	0	2026.8	2005	2556.2	1130.4	2248	1949.5	1963.8	2363.5	1128	1894	1331	1434.2	2039.5	1119.1	1124.1	2076.8	2135.3	2423.1	1179	1987.6	1174.3	1651.7	547.4	877.5	1116.5	2055.6	1946.9	2661.5	1089.1	1952.2		1.12608	0.991394	1.05442	0.965514	1.03073	1.03363
842	842	2293	P35831	Tyrosine-protein phosphatase non-receptor type 12 OS=Mus musculus OX=10090 GN=Ptpn12 PE=1 SV=3	Ptpn12	86.5	5.99	1628	24	77	12	0	360.1	195.3	562.4	107.2	508.3	361.7	215.2	536.6	109.7	561.5	278.1	175	422.8	110.1	489.4	406.6	222.1	668	145.3	532	439.2	192.9	494.2	94.9	570.1	473.6	209.8	577.4	95.3	488		1.07603	0.974907	1.30937	0.868733	0.869101	1.01963
843	843	3505	Q9R1C7	Pre-mRNA-processing factor 40 homolog A OS=Mus musculus OX=10090 GN=Prpf40a PE=1 SV=1	Prpf40a	108.4	7.69	1573	16	120	15	0	679.2	733.1	277.7	487.5	1498.3	837	1045.8	329.4	736.1	1398.8	764.4	1060.1	303.7	532.2	983.7	872.2	861.7	303.6	550.2	1038.1	850.2	1121.7	357.7	661.5	1106.4	703.5	990	290.1	560.2	1266.2		0.880692	0.946644	0.840502	0.761038	0.905204	0.866816
844	844	1103	Q9CQJ6	Density-regulated protein OS=Mus musculus OX=10090 GN=Denr PE=1 SV=1	Denr	22.2	5.3	2123	53	107	10	0	416.3	1260.5	321.8	323.5	726.9	487.3	1258	611.4	495.8	1120.2	478.6	1602.7	710.8	511	1123.2	353.6	743.3	309.4	360.1	668	511.6	1428.4	442.5	548.2	1307.9	449.6	1128.2	362.1	439.3	1139.4	Acetyl [N-Term]	0.592247	0.89682	0.922635	0.886043	1.01714	0.862977
845	845	738	P97384	Annexin A11 OS=Mus musculus OX=10090 GN=Anxa11 PE=1 SV=2	Anxa11	54	7.66	1423	26	66	11	1	195.6	26.3	511.1		64.7	265.5	31	721		69.2	310.4	33.4	646.6		124.4	223	21.7	777.9		53.8	450.9	27	1559.2		127.8	235.5	31	493.4		82.7		0.684327	1	0.887006	NA	1.19509	0.941605
846	846	2922	Q91Z38	Tetratricopeptide repeat protein 1 OS=Mus musculus OX=10090 GN=Ttc1 PE=1 SV=1	Ttc1	33.2	5.01	1852	57	135	11	0	2832.4	1492.1	1021	1481.5	1940.4	2020.8	1353.6	1058.2	1418.4	1298.9	2303.6	1768.4	1190.4	1514.8	1192.6	2546.9	1588.2	1223.9	1541.6	1792.4	1462.3	1277.8	911.8	1202.5	1205.4	2608.3	1736	1413.7	1455	1327.2		1.33595	1.28251	1.29073	1.0258	1.02179	1.19135
847	847	371	P09671	Superoxide dismutase [Mn], mitochondrial OS=Mus musculus OX=10090 GN=Sod2 PE=1 SV=3	Sod2	24.6	8.62	2324	32	141	9	0	7814.1	6095.8	7106.5	7421	11021	3216.5	3510.6	2865.7	4043.9	4351.8	1933.6	1849.4	1742	3181.2	2333	6643.5	11707.9	5599.2	7646.8	8517.2	1852.2	2248.9	2593.2	3066.2	2301.2	6278.8	4751.9	6685.1	4917.7	4120.1		2.3328	1.35359	1.95206	1.21608	0.946758	1.56026
848	848	2697	Q9CQN7	39S ribosomal protein L41, mitochondrial OS=Mus musculus OX=10090 GN=Mrpl41 PE=1 SV=1	Mrpl41	15.3	9.82	2521	59	168	10	0	2814.7	2405.4	2629.4	2342.1	2939.6	1999.1	2093.4	2295.3	2199.4	2591.9	1655.1	1683.7	2086	2098.3	1392.6	2445.6	2555.2	2510.4	2732.7	3107.4	856.8	1695.8	463.4	1771.3	1375.4	2269.7	2106.2	2337.7	2259.4	2583.1		1.01847	1.00611	1.13536	1.02728	0.996605	1.03677
849	849	4446	Q9JKB1	Ubiquitin carboxyl-terminal hydrolase isozyme L3 OS=Mus musculus OX=10090 GN=Uchl3 PE=1 SV=2	Uchl3	26.1	5.05	2379	43	117	8	0	693.8	512.2	662.7	65.4	386.2	1146.2	615.9	1387.1	157.8	948.4	2006	1155.1	2423.1	273.1	2345.5	815.9	289.2	836.9	60.6	333.6	1834.6	1205.6	2130.8	347.1	2205	685.6	411.9	691.4	116.2	947.7		0.49845	0.668777	0.59815	0.736375	0.999262	0.700203
850	850	834	Q9D8E6	60S ribosomal protein L4 OS=Mus musculus OX=10090 GN=Rpl4 PE=1 SV=3	Rpl4	47.1	11	1986	31	97	13	0	619.8	763.7	2655.4	1128.3	195.2	667.9	674.3	1878.8	2034.9	276.4	893.1	659.3	1785.8	1103.1	124.2	781.9	451.7	2889.9	1328.8	215.8	468.4	748.7	3765.7	1314.3	139.5	793.6	642.8	1356	1739.7	284	Acetyl [N-Term]	0.721737	0.953285	1.1882	0.854931	1.0275	0.94913
851	851	2963	Q9CQ45	Neudesin OS=Mus musculus OX=10090 GN=Nenf PE=1 SV=1	Nenf	18.9	5.27	3529	61	168	8	0	2959.2	1836.3	2097.3	1912.9	2390.3	2866.1	2275	2102.2	1812.8	2069	1618.8	2110.7	1592.2	1374.6	1038.3	2646.2	2003.9	2144.4	2001.3	2533	1255.1	1717	383.7	1462.2	1185.3	3230.6	2287.9	2448.9	1997.8	2130.7		1.16492	1.00567	1.12718	1.10205	1.02982	1.08593
852	852	4685	Q9JMG1	Endothelial differentiation-related factor 1 OS=Mus musculus OX=10090 GN=Edf1 PE=1 SV=1	Edf1	16.4	9.99	4196	64	307	16	0	8153.9	12596.1	9981	13170.1	17811.1	7163.1	11819.3	6251.4	10892.4	11976	6086.2	8991.5	5904.1	11844.5	6177.6	8505.2	13257	8980.5	14320.5	14565.6	4344.9	10239.6	1421.7	9231.1	6134.5	8761.3	13558.3	8775.9	11384.7	12732.8	Acetyl [N-Term]	1.40383	1.14713	1.22312	1.0452	1.06319	1.17649
853	853	166	Q9CVB6	Actin-related protein 2/3 complex subunit 2 OS=Mus musculus OX=10090 GN=Arpc2 PE=1 SV=3	Arpc2	34.3	7.36	1493	49	105	13	0	397.1	327.7	816.2		133.2	756.2	319.8	1095.1		296.3	1529.5	456	1350.9		1495.3	681.5	125.5	1057		138.6	3015.9	908.2	10705.7		1630.1	683.8	189.8	753.5		237		0.688065	0.593496	0.904258	NA	0.799865	0.746421
854	854	1401	P26369	Splicing factor U2AF 65 kDa subunit OS=Mus musculus OX=10090 GN=U2af2 PE=1 SV=3	U2af2	53.5	9.09	976	29	73	11	0	843.1	159.6	399.9	163.3	281.9	754.2	330.2	948.4	480.3	473.5	795.2	194.5	653.9	186.4	633.6	800.7	142.6	640.4	174.5	338.7	704.2	358.1	1536.7	362.7	781.8	981.1	182.2	410.9	233.3	342.3	Acetyl [N-Term]	0.433256	0.551787	1.30085	0.485738	0.722914	0.698909
855	855	4142	Q3UJB9	Enhancer of mRNA-decapping protein 4 OS=Mus musculus OX=10090 GN=Edc4 PE=1 SV=2	Edc4	152.4	5.78	1771	16	76	11	0	63.4	42.4	32.4	146	187.3	57	59.3	38.2	181	213.6	55.1	77.2	42.9	186.2	159.6	61.5	67.4	51.5	159.4	247.6	53.4	59.9	56.6	153.6	183.5	69	65.2	25.9	126.3	169.8	Acetyl [N-Term]	0.67801	1.09949	1.21053	0.69779	0.794944	0.896153
856	856	4503	Q8CI94	Glycogen phosphorylase, brain form OS=Mus musculus OX=10090 GN=Pygb PE=1 SV=3	Pygb	96.7	6.73	538	24	46	18	3	23.7		1149.5		4	25.9		1441.3		11.9	39		1472.1		47	19.2		1280.3		11.2	63.3		1803		51.2	31.9		1313.9		4.8		0.911608	NA	1.23166	NA	0.403361	0.848876
857	857	2927	Q9CX86	Heterogeneous nuclear ribonucleoprotein A0 OS=Mus musculus OX=10090 GN=Hnrnpa0 PE=1 SV=1	Hnrnpa0	30.5	9.31	2163	43	127	12	0	1452.4	355.9	609.4	3094.7	1226	1511	488.6	1411.5	5783.2	3588.4	1725.7	394.3	863.1	3072.1	1748.8	1847.6	263.4	1228.1	2960.5	2528.2	1451.4	616.4	1783.8	4284	2199.8	1641.2	354.8	701.2	3360	2040.2		0.496776	0.726156	1.08617	0.580993	0.568554	0.69173
858	858	2322	Q9CXK9	RNA-binding protein 33 OS=Mus musculus OX=10090 GN=Rbm33 PE=1 SV=2	Rbm33	137.2	6.46	2746	16	117	14	0	1002.2	865.4	626.5	1564.1	596	1140.6	937.7	487.3	1223.8	531.1	1161	863.9	457.3	1333.2	322.4	984.7	1103.4	622.6	1756.8	697.6	1552.7	807.9	115.9	1112.3	341.2	1152.9	947.5	643.3	1288.9	567.1	Acetyl [N-Term]	1.32013	1.01045	1.01078	1.05319	1.06778	1.09247
859	859	1869	Q8R5A3	Amyloid beta A4 precursor protein-binding family B member 1-interacting protein OS=Mus musculus OX=10090 GN=Apbb1ip PE=1 SV=2	Apbb1ip	74.3	5.35	2101	21	104	13	0	1380.6	967.1	354.5	441.9	966.8	940.1	1144.5	374.3	382.6	958.8	747.2	1225.6	454.3	536.5	799.5	1173.7	1281	374.4	466.6	973.4	910	1120.8	716	416.8	857.2	1818.7	1208.4	284.1	359.7	889.2		0.759017	1.05583	1.93458	0.940146	0.927409	1.1234
860	860	294	Q9QUI0	Transforming protein RhoA OS=Mus musculus OX=10090 GN=Rhoa PE=1 SV=1	Rhoa	21.8	6.1	2127	50	98	8	0	1003.4	938.2	1216.9	205.1	267.8	1486.6	997.8	1604.3	286.5	386.4	1829.7	975.5	1582	222.9	1089.6	1387.3	605.1	1554.1	127	257.2	2735.4	1209.7	5339.2	367.7	1143.9	1329	726	1272.4	230.6	331.1		0.793118	0.727601	0.893986	0.804887	0.856884	0.815295
861	861	3379	Q6ZWY8	Thymosin beta-10 OS=Mus musculus OX=10090 GN=Tmsb10 PE=1 SV=3	Tmsb10	5	5.36	10227	89	1278	11	3	22065.3	46931.2	28318.1	25924.8	32161.5	19548.9	45977.3	23845.7	23968.1	34395.4	17337.6	48508.7	23869.8	32847.6	23725.4	19237.2	60346.7	30034.9	29757.2	35009.4	23080.8	39502.2	8948.2	28464.6	26627.4	17980	46224.1	26333.7	23635.4	31548.8	Acetyl [N-Term]	1.10434	1.00537	0.919745	0.986119	0.917239	0.986562
862	862	486	O08663	Methionine aminopeptidase 2 OS=Mus musculus OX=10090 GN=Metap2 PE=1 SV=1	Metap2	52.9	5.82	1136	37	66	14	0	62.3	78.1	184	76.3	9.6	110.2	78.1	240.3	61.1	15.7	178.4	105.1	212.4	48.4	97.9	119	75.8	169.3	64.3	5.2	115.8	141.2	211.5	57.1	71.4	137.3	94.6	179	57.6	13.7	Acetyl [N-Term]	0.744902	1.21127	1.24592	0.942717	0.872611	1.00348
863	863	3665	Q8K0T0	Reticulon-1 OS=Mus musculus OX=10090 GN=Rtn1 PE=1 SV=1	Rtn1	83.5	4.58	1053	21	89	13	1	810.5	869.8	892.7	427.4	366.2	1109.3	815.2	669.7	726.7	538.6	1208.2	1848.6	632.7	1067.2	619.6	825.3	704.8	1107.3	623.8	314.8	1291.1	1413.3	652.2	782.6	620.7	1009.9	827.9	626.6	658.2	466	Acetyl [N-Term]	0.935643	1.01558	0.910394	0.905738	0.865206	0.926512
864	864	538	Q9R1T2	SUMO-activating enzyme subunit 1 OS=Mus musculus OX=10090 GN=Sae1 PE=1 SV=1	Sae1	38.6	5.36	1320	41	55	12	0	68.2		312.4		12.6	102.6		348.9		41.6	158.4		421.3		175.5	72.5		294.4		20.3	166.8		971.3		135.7	93		222.7		47.1		0.638292	NA	0.906433	NA	1.13221	0.892312
865	865	1184	P67778	Prohibitin OS=Mus musculus OX=10090 GN=Phb PE=1 SV=1	Phb	29.8	5.76	2508	54	128	13	0	197.5	137.1	384.7	126.2	138.4	176.4	135.7	483.2	88.1	183.2	285.4	181.7	518.3	82.4	540.4	194.6	163.1	412	121.1	176.6	231.8	227.2	1803.4	91.2	482.1	227.8	126.4	345.6	69.7	151.1		0.715232	0.931466	1.29138	0.791146	0.824782	0.910802
866	866	762	Q9D8N0	Elongation factor 1-gamma OS=Mus musculus OX=10090 GN=Eef1g PE=1 SV=3	Eef1g	50	6.74	1082	30	131	17	0	1305.2	1547.7	1565.2	1091.6	304.4	2588.1	1311.7	1682.6	1114.1	597	4644.5	1757.1	1862.4	1055	2916.4	2393.5	1050.2	1800.5	851.2	315	3610.7	2797.8	6069.1	1121.7	2690.2	2243.9	1313.8	1003.5	899.3	413	Acetyl [N-Term]	0.596398	1.0016	0.867007	0.807199	0.691792	0.792799
867	867	1106	Q9EQH3	Vacuolar protein sorting-associated protein 35 OS=Mus musculus OX=10090 GN=Vps35 PE=1 SV=1	Vps35	91.7	5.44	990	21	52	13	0	19.2		208.2		19.3	45.7		341.5		13.9	65.8		243.1		33.2	27.5		239.9		4.3	130.6		1041		39.1	46.9		257.7		12.2		0.754612	NA	1.02626	NA	0.877698	0.886189
868	868	125	P61759	Prefoldin subunit 3 OS=Mus musculus OX=10090 GN=Vbp1 PE=1 SV=2	Vbp1	22.4	6.28	2004	68	127	14	0	1192.2	1224.4	1666	1571.7	2208.7	1145.7	1211.1	1839.1	1495.9	2162.9	1035.6	986	1952	1549.2	1885.5	1199	1192.5	1696.7	1865.4	2156.3	929.1	1172.2	1546.4	1702.6	1930.8	991.2	1206.4	1725.9	1446.8	2083		0.938448	0.996119	0.865148	0.967177	0.963059	0.94599
869	869	2185	Q62095	ATP-dependent RNA helicase DDX3Y OS=Mus musculus OX=10090 GN=Ddx3y PE=1 SV=2	Ddx3y	73.4	7.53	2288	22	124	14	0	49.7	118.5	51	86.7	91.4	78.2	197.7	78.2	189.8	145.9	64.8	206.9	64.9	168.7	73.8	22.4	67.4	50.8	91	75	58.8	221	37.6	125.2	89.9	111.1	221	94.8	171.3	177.3	Acetyl [N-Term]	1.21228	1.11786	1.42072	0.902529	1.21522	1.17372
870	870	2028	Q5SUF2	Luc7-like protein 3 OS=Mus musculus OX=10090 GN=Luc7l3 PE=1 SV=1	Luc7l3	51.4	9.77	1703	36	120	15	0	856.5	1168.5	828.6	603.8	1106.2	1090.6	1438.3	1231.6	780.6	1484.5	1261.4	1902.7	1345.7	1054.2	1941.2	780.3	899	982.8	542.5	1031.9	952.5	1597.7	1057.6	782.3	1843.2	1007.6	1373.7	997.9	824	1547.9	Acetyl [N-Term]	0.810247	0.955086	0.923895	1.0556	1.04271	0.957507
871	871	3931	Q9QYE6	Golgin subfamily A member 5 OS=Mus musculus OX=10090 GN=Golga5 PE=1 SV=2	Golga5	82.3	6.23	831	28	50	17	0	42.7	182.2	93.7		130.5	30.7	186.4	127.9		153.9	31.7	189.9	99.9		116.4	32.4	187.6	117.6		135.3	19.2	186.3	144.6		133.5	29.2	185.3	109.5		138.4	Acetyl [N-Term]	0.856138	0.994099	0.95114	NA	0.899285	0.925165
872	872	2508	Q8C7E9	Cleavage stimulation factor subunit 2 tau variant OS=Mus musculus OX=10090 GN=Cstf2t PE=1 SV=2	Cstf2t	65.8	7.25	2100	22	115	9	0		120.2	171.6	80.6	68.4		116	93.9	66.2	71.4		88.1	71.2	75.3	22.1		175.5	182.8	118.6	84.6		60.3	40.7	52.4	33.9		106.6	164.8	60.3	44		1.75506	0.918966	NA	0.910876	0.616246	1.05029
873	873	3749	P10639	Thioredoxin OS=Mus musculus OX=10090 GN=Txn PE=1 SV=3	Txn	11.7	4.92	6063	89	491	9	0	16804.5	14696.1	13981.8	13907.6	16640.9	14829	15884.2	16614.1	13492.5	18327.6	12768.9	14349.5	16856.4	13747.1	18648.4	15401.2	14415.6	13461.1	16117.6	16946.8	16549.9	13573.8	11370.1	15785.8	20137.8	15177.7	13393	14349.6	13970	19289.1		0.8637	0.843165	1.02351	1.03539	1.05246	0.963646
874	874	650	Q9EPU0	Regulator of nonsense transcripts 1 OS=Mus musculus OX=10090 GN=Upf1 PE=1 SV=2	Upf1	123.9	6.61	2670	17	83	12	0	747.1	1044.6	894.4	1428.7	1026.1	805.3	1097.2	984.3	1962	1650.6	738.7	1131.2	870.8	1298	559.8	654.8	889	1023.2	1405.1	1204.5	433	1024.6	450.3	1179.1	638	973.7	1132.1	1208	1735	1701.3		1.22727	1.03181	1.20911	0.884302	1.03072	1.07664
875	875	2315	Q9DCH6	AN1-type zinc finger protein 6 OS=Mus musculus OX=10090 GN=Zfand6 PE=1 SV=1	Zfand6	24	6.51	3052	50	133	9	0	2751.6	2617.9	2981.3	4384.3	5045.2	2175.2	2653.1	2321.2	2936.7	3406.8	1762.2	2411.1	2020.8	3007.4	1688.4	2375.6	3017.4	2949.2	4247.3	4297.3	1430.2	2083.4	384.3	2386	1823.3	2926.8	3194.7	2988.2	3455.3	3646.6	Acetyl [N-Term]	1.28735	1.20414	1.34553	1.17659	1.07039	1.2168
876	876	4698	P54103	DnaJ homolog subfamily C member 2 OS=Mus musculus OX=10090 GN=Dnajc2 PE=1 SV=2	Dnajc2	71.7	8.7	2396	21	106	13	0	405.6	741.5	321.1	165	542.8	506.8	823.3	475.8	232.3	934.7	401.7	741.3	417.4	174.2	482.7	504.1	705.4	454.8	168.3	668.9	357.6	857.5	407.3	184.2	542.2	441.2	906.6	368.4	213	824		0.774275	1.10118	0.87056	0.916918	0.881566	0.9089
877	877	4548	Q6PB66	Leucine-rich PPR motif-containing protein, mitochondrial OS=Mus musculus OX=10090 GN=Lrpprc PE=1 SV=2	Lrpprc	156.5	6.83	404	18	45	20	0	31.2	99.7	145		16.3	33.2	81.5	162.6		26.4	28	140.4	196.5		21.6	28.4	83.9	166.8		27.7	4.9	100.8	378.3		26	45.8	83.2	157.1		30.8		0.966175	1.02086	1.37952	NA	1.16667	1.1333
878	878	3928	Q9JL26	Formin-like protein 1 OS=Mus musculus OX=10090 GN=Fmnl1 PE=1 SV=1	Fmnl1	122	5.82	390	19	32	16	1	48.9		180.8		9.9	53.6		244.6		24.6	53.2		248.5		32.3	52.6		202.2		32.2	56.2		728.5		29	69.5		169.9		16.7		0.694603	NA	1.29664	NA	0.678862	0.890036
879	879	3900	Q80TH2	Erbin OS=Mus musculus OX=10090 GN=Erbin PE=1 SV=3	Erbin	157.2	5.69	808	17	94	18	0	387.8	538.1	422.7	263.9	663.7	410.7	562.2	449.5	240.3	705.1	423	695.6	489.9	347.4	629.2	410.2	561.6	464.1	252.6	555.9	490.4	618.7	291.5	250.1	621.1	416.5	615.7	453.5	252.7	649.2		1.0089	1.09516	1.01412	1.0516	0.92072	1.0181
880	880	1915	A2AJI0	MAP7 domain-containing protein 1 OS=Mus musculus OX=10090 GN=Map7d1 PE=1 SV=1	Map7d1	93.2	10.15	920	15	85	13	0	610.5	231.3	265	424.4	688.4	707.8	391.2	265	503.3	823.9	629.7	525.6	266.9	691.5	809.8	566.5	271.5	283.1	482.5	721.9	770.6	405.7	135.7	497.3	879	785.6	421.5	312.3	502.9	729.9		1.17849	1.07745	1.10992	0.999205	0.885908	1.0502
881	881	1828	Q8R1B4	Eukaryotic translation initiation factor 3 subunit C OS=Mus musculus OX=10090 GN=Eif3c PE=1 SV=1	Eif3c	105.5	5.78	797	20	52	16	0	141.3	556.6	312.5	149.1	22.7	173.7	401.8	302.9	201.6	23.9	195.9	355	316.1	135.5	72	156.6	780.6	341	139.4	22.2	154.2	400.2	953.2	167.6	63.5	181	458.8	238.5	193.6	16.7		0.787389	1.14186	1.04203	0.960317	0.698745	0.926068
882	882	2160	Q6ZWX6	Eukaryotic translation initiation factor 2 subunit 1 OS=Mus musculus OX=10090 GN=Eif2s1 PE=1 SV=3	Eif2s1	36.1	5.08	1006	47	52	13	0	152.5	222.3	268.4	52	96.6	216.4	186	367.7	66.7	137.2	340.8	295.6	427.2	43.1	342.7	197.5	157.2	288.7	53.6	93.2	288.1	320.2	901.5	76.2	315.2	198	164.2	233.8	60.6	154.1		0.635844	0.882796	0.914972	0.908546	1.12318	0.893067
883	883	1172	Q923D2	Flavin reductase (NADPH) OS=Mus musculus OX=10090 GN=Blvrb PE=1 SV=3	Blvrb	22.2	7.01	3181	59	147	8	0	1233.1	908.9	1805.6	601.1	1204.3	1810.7	1005	2177.4	534.8	1447.3	2333.2	1193.3	2205.7	382.6	5035.8	1657.2	565.3	1975.1	392.3	1264	3034.1	1806.2	10507.9	691.5	4143.4	1551.9	742.4	1540.8	414	1380.4		0.707633	0.738706	0.857072	0.774121	0.953776	0.806262
884	884	805	Q61210	Rho guanine nucleotide exchange factor 1 OS=Mus musculus OX=10090 GN=Arhgef1 PE=1 SV=2	Arhgef1	102.7	5.6	732	21	42	13	0	128.8	38.7	318.2		28.2	148.1	63.4	354.2		26.4	107	51.2	396		21.6	122.8	54	393.5		28.2	160.8	69.9	1683.7		29.2	173	45.1	363.3		27.2		1.02569	0.711356	1.16813	NA	1.0303	0.98387
885	885	1394	Q9CRC3	UPF0235 protein C15orf40 homolog OS=Mus musculus OX=10090 PE=1 SV=1	Q9CRC3	13.2	9.16	2021	65	101	8	0	1294.6	1102.2	1226.9	2297.2	2789.3	1189.7	1105.8	887.2	1968.4	1997.3	1116.3	1003	924.4	2260.5	1286	1207.9	1307.7	1270.1	2299.1	2560.2	1037.1	999.9	344	1984.5	1421.8	1203.8	1124	1181.6	1978.9	1993.1		1.33183	1.01646	1.01185	1.00533	0.997897	1.07267
886	886	1054	Q640N3	Rho GTPase-activating protein 30 OS=Mus musculus OX=10090 GN=Arhgap30 PE=1 SV=3	Arhgap30	120	4.84	1004	19	67	14	0	225.8	420.6	331.2	609.9	377.1	271.6	718.3	451.3	771.3	538.6	231.8	752	452.9	1039.6	418.9	219.6	517.8	404.6	761.3	375	332.2	572.7	310.4	812.3	520.4	262.8	557	415.8	665.9	445.8		0.921338	0.775442	0.967599	0.863348	0.827701	0.871086
887	887	3892	Q9Z1Z0	General vesicular transport factor p115 OS=Mus musculus OX=10090 GN=Uso1 PE=1 SV=2	Uso1	106.9	4.93	1394	21	99	17	0	861.6	830.8	496.2	411.7	491.7	1058	1227.7	687.2	572.1	606.3	1144.2	1590.5	733.3	482.3	726.6	937.3	771.3	629.2	424.4	437.1	1484.7	1574.2	1287.9	537.3	741	1112.9	1195.7	585.2	510.3	520.3		0.851572	0.973935	1.05189	0.891977	0.858156	0.925506
888	888	4341	Q9CY57	Chromatin target of PRMT1 protein OS=Mus musculus OX=10090 GN=Chtop PE=1 SV=2	Chtop	26.6	12.23	1567	19	66	4	0	354.4	879.3	1147.3	193.7	48.4	295.2	759.9	1359.1	404.5	59.8	137.5	622.6	1068	212.1	27.6	434.3	641.8	1396.7	190.1	102.7	103.9	477	561.8	184.2	34.9	222.3	693.4	1161.1	384.7	56.8		0.854315	0.912488	0.753049	0.951051	0.949833	0.884147
889	889	1132	P18572	Basigin OS=Mus musculus OX=10090 GN=Bsg PE=1 SV=2	Bsg	42.4	5.85	3506	26	163	11	0	5667.2	3111.2	4310.5	4523	5177.4	5042.1	3163.4	4703.4	3359.4	3827.6	4524.8	3318.4	4162.9	2620.7	5193.7	5116.4	2102	4430.8	2643.9	5157.9	3557.7	3510	2840.5	3114	4568.1	7245.9	3136.6	5616	4276.8	4153.2		1.19403	0.991528	1.43708	1.27308	1.08507	1.19616
890	890	3467	P40630	Transcription factor A, mitochondrial OS=Mus musculus OX=10090 GN=Tfam PE=1 SV=2	Tfam	28	9.69	2286	40	188	14	0	5763.8	2556.9	1320.2	4972.7	4771	4329	1997.6	1146.9	4959.1	3899.1	3447.8	1816.5	1201	4718.7	2506.9	4904.9	2458.3	1227.7	4675.6	3811.7	3812.9	1704	1576.9	4559.3	2523.6	5148.9	2041.5	1296.5	5724.9	3869.6		1.13044	1.02198	1.1894	1.15442	0.992434	1.09773
891	891	2930	Q8CI08	SLAIN motif-containing protein 2 OS=Mus musculus OX=10090 GN=Slain2 PE=1 SV=2	Slain2	62.3	9.47	1758	27	83	12	0	203.4	244.1	132.7	427.1	76.3	255.6	261.2	154.4	480.3	100.6	240.9	281.4	167.8	567.4	72.7	211.8	239.2	167.4	401.6	79.4	262.1	268.5	83.2	450.8	91.3	237	274.7	162.9	410.3	92.8		1.05505	1.05168	0.92723	0.854258	0.922465	0.962138
892	892	1315	Q9JHE7	Protein TSSC4 OS=Mus musculus OX=10090 GN=Tssc4 PE=1 SV=1	Tssc4	33.5	5.14	5256	35	152	8	0	2501.2	2832.1	2179.1	2809.8	2955.6	1940.8	2630.4	1597	1882.5	1911.4	1571.4	2547.7	1499.8	1916.1	1134.4	2333.8	2920.8	1944.6	2745.8	2928.2	1124.3	2119.5	324.9	1559.6	1173.2	2150.2	2678.1	1884.9	2116.5	2233.3		1.18028	1.01813	1.10789	1.1243	1.16841	1.1198
893	893	3997	Q5SUA5	Unconventional myosin-Ig OS=Mus musculus OX=10090 GN=Myo1g PE=1 SV=1	Myo1g	117.2	8.59	435	21	38	15	0	44.6	35.4	395.4			37	51.9	500.4			50.9	58.1	418.8			55.2	28.6	534.8			62.6	59.6	1253.9			44.5	36	361.9				0.723221	0.693642	1.2027	NA	NA	0.873189
894	894	3915	Q9DCB8	Iron-sulfur cluster assembly 2 homolog, mitochondrial OS=Mus musculus OX=10090 GN=Isca2 PE=1 SV=2	Isca2	16.7	5.6	4542	51	133	8	0	1290.6	1054.7	1033.1	1343	1441.2	1316.8	1128.9	1235.5	1132	1295	1070.9	1121.3	990.1	1217.4	884.9	1377.9	867.9	1096.4	1206.2	1336.4	1122.1	1086	493.8	1272.1	882.4	1188.7	997.8	1014.4	1375.8	1312.7		0.821044	0.883869	0.902719	1.21537	1.01367	0.967334
895	895	2353	P63276	40S ribosomal protein S17 OS=Mus musculus OX=10090 GN=Rps17 PE=1 SV=2	Rps17	15.5	9.85	1836	59	130	8	0	1372.2	2188.9	5481	2183.4	1226.8	1646.9	1525.1	2748.7	1649.4	848.5	2379.4	1142.7	2271	1205	1754.9	1913.1	1874	4995.4	2165.7	1319.7	1214.8	1669	3179.6	1719.5	1491.6	1471.2	1394.3	2862.9	1815.4	738.9		1.04155	0.914235	0.893315	1.10064	0.870831	0.964114
896	896	2047	Q8VE97	Serine/arginine-rich splicing factor 4 OS=Mus musculus OX=10090 GN=Srsf4 PE=2 SV=1	Srsf4	55.9	11.4	4030	24	197	14	4	3320.2	4063.2	4021	4879.6	4358.8	4471.5	4591.3	4847.3	5374.5	5086.8	3826.5	4262.4	5439.3	4607	4613.5	4322.5	3734.1	4253.7	4456.4	4524.1	3228.4	4124.5	3020.5	5341.7	4700	2758	4116.4	4406.6	5087	5122.8		0.909083	0.896565	0.616795	0.946507	1.00708	0.875206
897	897	3610	P14685	26S proteasome non-ATPase regulatory subunit 3 OS=Mus musculus OX=10090 GN=Psmd3 PE=1 SV=3	Psmd3	60.7	8.44	586	28	41	14	0	179.1	71.1	187.6		56.3	333.9	73.8	209.9		86.4	406.5	116	238.7		293.4	455.6	64.3	193.9		60.4	240.2	128.2	687.3		287.5	145.9	58.1	145.8		80.4		0.694616	0.787263	0.436957	NA	0.930556	0.712348
898	898	357	Q8VCM7	Fibrinogen gamma chain OS=Mus musculus OX=10090 GN=Fgg PE=1 SV=1	Fgg	49.4	5.86	1367	43	77	12	0	123	284.2	385.2	335.1	296.7	211.7	399.1	489.6	347.9	522.3	457	275.3	531	108.5	989.5	361.4	191.3	460.9	293.4	626.9	882.2	368.6	3182.1	211	769.9	122.2	273.7	242.8	89.1	254.9		0.495915	0.685793	0.577232	0.256108	0.488034	0.500616
899	899	3774	P62751	60S ribosomal protein L23a OS=Mus musculus OX=10090 GN=Rpl23a PE=1 SV=1	Rpl23a	17.7	10.45	2761	54	222	14	0	9816.8	13031.2	13122.5	4708.5	3481.9	5681.1	7117	12016.6	10655.8	6101.9	5855.9	6078.9	9737.2	6484.2	5108.5	11124.8	10487.4	10159	5282.4	3770.9	3560.5	7824.4	5896.7	8884.5	5048	8785.2	9729.6	14540	9643.5	6235.9		1.20999	1.36709	1.54639	0.905	1.02196	1.21009
900	900	68	Q9CXE2	B-cell CLL/lymphoma 7 protein family member A OS=Mus musculus OX=10090 GN=Bcl7a PE=2 SV=1	Bcl7a	22.8	5.06	2192	59	103	9	2	1778.8	1129.8	1485.5	1295.1	1205.8	1897.7	1179	1453.5	1229.7	1066.6	1166.4	871.2	1473.4	904.8	539.3	2217.3	1280.4	1527.2	1178.5	1153.5	758.3	828	336.3	926.2	533.8	1305.3	1140.2	1734.4	1229.1	1188		1.19326	0.967091	0.687833	0.999512	1.11382	0.992303
901	901	4300	Q9CZX8	40S ribosomal protein S19 OS=Mus musculus OX=10090 GN=Rps19 PE=1 SV=3	Rps19	16.1	10.4	6977	50	353	10	0	10373.7	10570.6	15033.6	12356.7	9274.1	8760.2	9294.2	13664.4	11222.9	5376.1	6043.2	5313.5	11094.9	4733.8	4424.7	13940.5	10539.3	13544.3	13796	11864	2664.7	5495.3	3674.8	5207.4	3553.6	8369.8	9765.3	14661	11858.5	5285.9		1.07293	1.05069	0.955435	1.05663	0.983222	1.02378
902	902	3742	O88513	Geminin OS=Mus musculus OX=10090 GN=Gmnn PE=1 SV=1	Gmnn	23.3	4.67	1806	48	133	11	0	1321.6	1168.2	1269.9	1169.9	790.2	868	819.7	893.4	894.4	728	659.4	746.1	848.8	712.9	389.3	1106.2	1269.8	935.5	1126.1	791.7	192.4	568.8	119.9	571.9	403.7	926.8	1146.4	1256.7	1233.1	958.4		1.40665	1.39856	1.06774	1.37869	1.31648	1.31362
903	903	239	O08900	Zinc finger protein Aiolos OS=Mus musculus OX=10090 GN=Ikzf3 PE=1 SV=2	Ikzf3	57.9	6.33	2300	25	108	9	0	403.4	210.1	442	17.2	536.2	443.2	315.1	394.2	33.1	805.2	472.6	530.7	492.8	34.4	750	529.2	257.5	525.2	22.2	600.5	518	441.3	419	31.8	750.9	423.7	284.6	599.3	27.3	870.6	Acetyl [N-Term]	1.52029	0.903205	0.956002	0.824773	1.08122	1.0571
904	904	1070	Q921M7	Protein FAM49B OS=Mus musculus OX=10090 GN=Fam49b PE=1 SV=1	Fam49b	36.8	6.06	952	47	59	11	1	222	46.8	268.1		149.5	391.7	79.1	414.5		228.5	671.3	97.2	450.7		1300.5	305.1	35.7	333.5		159.4	1016.7	143.5	2806.1		1271.2	307.1	74	273.4		261.7		0.65959	0.935525	0.784018	NA	1.1453	0.881107
905	905	1448	Q9D1G1	Ras-related protein Rab-1B OS=Mus musculus OX=10090 GN=Rab1b PE=1 SV=1	Rab1b	22.2	5.73	2402	68	144	11	0	211.4	171.1	99		16.1	312.8	211.3	109.8		18.4	241.1	254.3	115.5		29.4	217.2	115.6	151		20.1	372.1	231.7	349.2		35.3	285.2	155.6	135		24.6	Acetyl [N-Term]	1.22951	0.736394	0.911765	NA	1.33696	1.05366
906	906	488	P23492	Purine nucleoside phosphorylase OS=Mus musculus OX=10090 GN=Pnp PE=1 SV=2	Pnp	32.3	6.16	1866	55	84	12	0	159.5	60.3	268.7		380	170.5	64.1	255.7		402.1	199.9	75.1	278.6		855.2	156.1	37.3	291.3		423	243.8	106.3	1338.9		787.8	218.6	46.4	254.8		330.3	Acetyl [N-Term]	0.99648	0.723869	1.28211	NA	0.821437	0.955975
907	907	1937	Q7TPW1	Nexilin OS=Mus musculus OX=10090 GN=Nexn PE=1 SV=3	Nexn	72.1	5.01	1642	26	128	17	1	1308	2078.8	1081.4	926.3	1568.2	1379.5	2601	1279.6	1061	2098.4	1118.4	2225	1087.2	1145.6	1340.2	1308.8	2226.3	1179.7	857.2	1529.2	1467.2	2416.4	1576.2	988.4	1373	1357	2672.9	1303.4	928.5	1789.4		1.0186	1.02764	0.98369	0.875118	0.852745	0.951559
908	908	168	Q9CQR2	40S ribosomal protein S21 OS=Mus musculus OX=10090 GN=Rps21 PE=1 SV=1	Rps21	9.1	8.51	15557	66	571	5	0	12081.7	21633.2	12691.3	12054.5	11537.6	9790.8	20959.3	10915.5	9859.7	9152.4	7416.1	16071.6	11381.5	8511.3	5380.9	13567.9	22104.6	13128.2	12450.7	12865.5	5173.7	16352.9	2836.8	8741.9	5912.1	9606.3	19038	11093.9	10124.6	9083.4	Acetyl [N-Term]	1.01634	0.908332	0.981156	1.02687	0.992461	0.985032
909	909	1905	Q8C1B7	Septin-11 OS=Mus musculus OX=10090 GN=Sept11 PE=1 SV=4	Sept11	49.7	6.68	692	35	49	12	4	104.5	83.5	329.6		164.1	160.1	90.4	486.7		197.4	228.5	102.2	603.3		365	117.6	60.9	314		150.6	323.9	116.3	1053.3		386.4	146.8	67.3	240.7		172.7	Acetyl [N-Term]	0.494555	0.744469	0.916927	NA	0.874873	0.757706
910	910	4139	Q8BUK6	Protein Hook homolog 3 OS=Mus musculus OX=10090 GN=Hook3 PE=1 SV=2	Hook3	83.2	5.19	677	30	43	16	0	125.2	6.4	32.9	19.3	106	222.6	7.9	47.5	20.8	180.8	272.6	64	59.5	32	284	97.1	5.3	26.4	20	81.2	319.9	47.3	38.9	38.4	299.4	143.7	8.3	27	28	182.5		0.568421	1.05063	0.645553	1.34615	1.0094	0.924033
911	911	2205	P35601	Replication factor C subunit 1 OS=Mus musculus OX=10090 GN=Rfc1 PE=1 SV=2	Rfc1	125.9	9.33	1424	14	87	13	0	498.5	368.7	175.1	613.5	491.7	501.6	420.2	203.1	758.2	496.3	436.3	415.7	193.5	568.6	320.2	455.1	315.9	189.9	624.1	446.9	276.3	418.9	141.5	540.7	302.3	589.3	460.3	208.5	724	496.9		1.02659	1.09543	1.17484	0.954893	1.00121	1.05059
912	912	813	Q9JI11	Serine/threonine-protein kinase 4 OS=Mus musculus OX=10090 GN=Stk4 PE=1 SV=1	Stk4	55.5	5.19	966	30	75	15	3	314.8	101.7	604.9	212.7	260.7	313.9	155.6	701.4	253.4	423	349.3	194.1	628.8	338	434.3	329.9	116.5	882.4	265.2	362	440.9	184	882.8	393.3	562.6	425.2	106.4	793.3	173.7	289.3		1.13102	0.683805	1.35457	0.685478	0.683924	0.90776
913	913	4087	Q9WVE8	Protein kinase C and casein kinase substrate in neurons protein 2 OS=Mus musculus OX=10090 GN=Pacsin2 PE=1 SV=1	Pacsin2	55.8	5.2	2202	24	123	12	1	1475	1269.9	1619.9	1689.8	2044.9	1686.5	1487.2	1633.3	1278.8	1716.7	1184.8	1323.4	1436.6	1329.4	1519.6	1589.3	1619.9	1803.4	1663.9	1748.6	1324.1	1409	1193.2	1213.4	1396	1719.9	1438.4	1907.7	1239.3	1674.4		1.168	0.967187	1.0198	0.969112	0.97536	1.01989
914	914	3255	P32020	Non-specific lipid-transfer protein OS=Mus musculus OX=10090 GN=Scp2 PE=1 SV=3	Scp2	59.1	7.44	2041	13	149	9	0	3546	1926.2	1730.6	3758.9	3037.9	2729.5	1823.6	1485.4	3169.8	2390.5	2000.8	1364.9	1450.2	3079.2	1561.3	3329	2125.9	1767	4016.9	3240.8	2259.5	1388.4	1269.6	3098	1544.8	3087.1	1634.6	1489.7	2996.8	2311.5		1.00289	0.896359	1.13101	0.945422	0.966953	0.988528
915	915	2217	O70305	Ataxin-2 OS=Mus musculus OX=10090 GN=Atxn2 PE=1 SV=1	Atxn2	136.4	9.55	2146	12	134	12	0	704.1	707.5	550.7	408.6	1485.2	813.1	839.2	649.1	400.7	1647.1	644.2	768.8	552.2	386.5	815.8	750.6	797.1	687.9	427.3	1393.8	623.9	685.6	263.8	365.9	987.9	909.5	819.8	627.9	405.6	1504.6		0.967339	0.976883	1.11856	1.01223	0.913484	0.997699
916	916	2105	P30416	Peptidyl-prolyl cis-trans isomerase FKBP4 OS=Mus musculus OX=10090 GN=Fkbp4 PE=1 SV=5	Fkbp4	51.5	5.72	644	35	62	17	0	479.6	168.7	729.8	90.2	222.6	658.9	186.9	694.6	124.4	431	1077	344.1	1004.7	122.9	242.6	645	97.5	819.8	74.1	501.6	571.7	445	1077.6	193.9	371	593.5	168.7	696.6	98.3	390.6		1.00288	0.902622	0.900744	0.790193	0.906265	0.90054
917	917	1761	Q5U3K5	Rab-like protein 6 OS=Mus musculus OX=10090 GN=Rabl6 PE=1 SV=2	Rabl6	79.8	5.53	1841	16	76	8	0	209.5	306.1	94	305.5	599.2	225.3	376.2	96.4	279.5	640.1	177.9	422	89.4	334.6	366.8	191	399.8	104.8	317.6	582.7	211.8	379.4	38.8	224.5	460.4	273.2	346.9	104.9	264.1	584.3		1.08817	0.922116	1.21261	0.944902	0.912826	1.01612
918	918	4396	Q9D8U8	Sorting nexin-5 OS=Mus musculus OX=10090 GN=Snx5 PE=1 SV=1	Snx5	46.8	6.62	1340	43	85	15	1	133.5	85.5	370.7		142.1	163.3	95.1	394.8		165.3	248.4	135.5	467.9		617.6	156.6	77	427.1		126.2	269.4	191.1	1824.2		581.1	137.6	68.8	323.2		156.6	Acetyl [N-Term]	0.818642	0.723449	0.842621	NA	0.947368	0.83302
919	919	1967	Q91ZF0	DnaJ homolog subfamily C member 24 OS=Mus musculus OX=10090 GN=Dnajc24 PE=1 SV=3	Dnajc24	22.1	5.91	1231	58	103	11	0	1498.9	1565.9	1032.8	1138.7	965.9	1502.3	1633.3	935.3	1136.5	975.1	1329.7	1311.6	1002.2	1378.6	717	1844.7	1187.2	991.5	1172.1	1009.5	968.5	1273	261.3	1328.6	647.5	1086.7	1331.2	901.5	1126.9	1013.4		0.963862	0.815037	0.723358	0.991553	1.03928	0.906617
920	920	1747	Q501J7	Phosphatase and actin regulator 4 OS=Mus musculus OX=10090 GN=Phactr4 PE=1 SV=2	Phactr4	76.6	6.48	1047	36	63	15	0	281.8	44.5	249.8	301.4	238.2	237.7	46.7	224.3	219.2	171.1	132.6	47.6	174	197.2	91	245.6	50.9	244.6	272.1	242.6	123.6	52.3	142.1	174.5	97.6	310.1	57.1	274.1	234.6	169		1.22202	1.2227	1.30459	1.07026	0.987726	1.16146
921	921	4478	O35691	Pinin OS=Mus musculus OX=10090 GN=Pnn PE=1 SV=4	Pnn	82.4	7.01	1474	22	101	15	0	1044.6	554	906.2	529.8	822.5	1072.7	622.7	909.9	634.6	664.1	1138.9	602	862.8	767.7	593.9	999	561.6	906.6	706.6	803.5	805.2	588.7	791.9	604.7	559.4	1104.9	599	1032.3	654	684.3		1.13452	0.96194	1.03002	1.03057	1.03042	1.03749
922	922	1943	Q9CZA6	Nuclear distribution protein nudE homolog 1 OS=Mus musculus OX=10090 GN=Nde1 PE=1 SV=1	Nde1	38.5	5.34	1441	41	81	12	2	292.1	523	77.2	680.4	81.5	215	511	105.3	495.8	57.5	187.9	504.2	95.5	520	41	231.7	502	72.8	482.7	59.7	118.5	431.7	75.1	319	35.1	294.6	605	90.5	503.4	54.5		0.859449	1.18395	1.37023	1.01533	0.947826	1.07536
923	923	2209	Q3UHK8	Trinucleotide repeat-containing gene 6A protein OS=Mus musculus OX=10090 GN=Tnrc6a PE=2 SV=2	Tnrc6a	203	6.99	401	13	37	17	0			17.3	83.1	46.9			11.1	87.3	55.1			13.2	84.3	23.4			17.7	110.7	41.3			17.1	58.4	33.1			17.6	70.2	49.3		1.58559	NA	NA	0.804124	0.894737	1.09482
924	924	846	Q8CIL4	Uncharacterized protein C1orf131 homolog OS=Mus musculus OX=10090 PE=1 SV=1	Q8CIL4	31.3	9.85	1132	41	80	10	0	206.8	282.5	227.9	377.5	896.2	215.6	258.7	267.1	563.3	1045	213.2	334	316.3	539.9	707.6	182.3	232.4	264.8	348	730.8	108.8	287.7	75.4	453.6	697.9	223	290.1	202.7	535.4	1111.1	Acetyl [N-Term]	0.758892	1.12138	1.03432	0.95047	1.06325	0.985663
925	925	564	Q9CQM5	Thioredoxin domain-containing protein 17 OS=Mus musculus OX=10090 GN=Txndc17 PE=1 SV=1	Txndc17	14	4.77	3663	78	159	8	0	1236.1	880.3	967.5	1325.3	672.3	1873	935	1922.9	2496.5	1106.7	1953.7	1565.7	2368.8	3781.5	1424	1172.1	536.1	1080.9	1226.9	559.5	2469.9	1296.8	934	3864.7	1552.1	1221.1	844.3	1140.7	2221.7	1176.3	Acetyl [N-Term]	0.593219	0.902995	0.651949	0.889926	1.06289	0.820196
926	926	3525	Q7TPE5	Probable RNA polymerase II nuclear localization protein SLC7A6OS OS=Mus musculus OX=10090 GN=Slc7a6os PE=1 SV=1	Slc7a6os	35	4.58	2658	50	109	10	0	1055.5	2533	714.4	234	656.3	883.2	2031.8	461.9	233.1	629.7	897	1823.2	473.7	177.3	381	1176.2	2381.6	686.8	214.5	720.7	567.7	1829.7	151.9	243.2	340.8	861.4	2167.7	628.4	221.6	615.4		1.36047	1.06689	0.975317	0.950665	0.977291	1.06613
927	927	1898	P61161	Actin-related protein 2 OS=Mus musculus OX=10090 GN=Actr2 PE=1 SV=1	Actr2	44.7	6.74	1255	24	72	7	0	137.9	212.8	789.5		118.8	284.2	234.4	1214.8		212.2	576.9	349.2	1501.4		1111	255.4	148.8	930.9		150.6	1021.9	542.8	7684.9		1130.6	227.4	167.3	787.5		168.1		0.648255	0.713737	0.800141	NA	0.792177	0.738577
928	928	681	P25911	Tyrosine-protein kinase Lyn OS=Mus musculus OX=10090 GN=Lyn PE=1 SV=4	Lyn	58.8	7.15	910	30	61	14	1	115	95.6	187.2		95.9	187.7	100.1	249.7		115	158.4	121.7	195		102.6	151.9	60.9	228.2		96.8	255.9	123	648.5		110.7	161.2	82.1	212.8		117		0.852223	0.82018	0.858817	NA	1.01739	0.887153
929	929	306	P51949	CDK-activating kinase assembly factor MAT1 OS=Mus musculus OX=10090 GN=Mnat1 PE=1 SV=2	Mnat1	35.8	5.82	2425	50	128	12	0	1520.8	1964.6	723.9	1861.7	1014.5	1334.5	2087.5	809.4	2203.4	1150.5	1125.6	1924.3	837.4	2132.4	565.2	1334.3	1767.8	765.5	2185.4	820.2	647.3	1962.7	320.6	1814.7	703.9	1347.4	1777.5	714.9	2163.1	1111.3		0.883247	0.851497	1.00967	0.98171	0.965928	0.93841
930	930	2335	P97351	40S ribosomal protein S3a OS=Mus musculus OX=10090 GN=Rps3a PE=1 SV=3	Rps3a	29.9	9.73	2888	47	166	13	0	2901.9	2703.1	2969.8	1321.5	1604.6	3240.4	2724.9	3358.4	3346.8	3230.9	5738.9	2506.2	3094.1	1153.5	5709.6	4091	2104.5	3218.5	1113.7	2208.4	3434.9	3347.9	9083.2	1574.6	4815.7	4309.4	2768	3111.7	2406.4	3152		0.926542	1.01582	1.3299	0.719015	0.97558	0.99337
931	931	2180	P70347	TRAF family member-associated NF-kappa-B activator OS=Mus musculus OX=10090 GN=Tank PE=1 SV=1	Tank	50.9	5.88	1126	38	78	12	0	371.5	304.8	213.8	230.7	421.5	416.4	324.6	243.5	201.3	415.1	376	312	247.7	277.2	322.2	358.5	317.5	243.9	234.1	357.5	525.9	263.5	178.3	261	379.1	391.9	334.2	260.4	234.6	408		1.0694	1.02957	0.941162	1.16542	0.982896	1.03769
932	932	1956	P62137	Serine/threonine-protein phosphatase PP1-alpha catalytic subunit OS=Mus musculus OX=10090 GN=Ppp1ca PE=1 SV=1	Ppp1ca	37.5	6.33	1357	49	90	13	9	405.1	361.3	692		264.9	289.2	322.3	647.2		298.6	418.3	266.5	694.9		673.8	302.6	327.7	646.5		236.4	535.2	312.9	3316.2		646.3	495.1	341.5	661.2		309.5		1.02163	1.05957	1.71196	NA	1.0365	1.20742
933	933	4378	P02468	Laminin subunit gamma-1 OS=Mus musculus OX=10090 GN=Lamc1 PE=1 SV=2	Lamc1	177.2	5.21	522	12	42	15	0	155	157.9	48.4	122.2	63.7	210	204.8	48.2	129.8	178.5	223.7	240.5	47.5	208.6	117.7	141.3	107.8	53.3	141.6	71.9	383.7	233.8	34.6	184.8	179.1	179.3	252.6	55.2	109.5	157.9		1.14523	1.2334	0.85381	0.843606	0.884594	0.992127
934	934	1253	P17095	High mobility group protein HMG-I/HMG-Y OS=Mus musculus OX=10090 GN=Hmga1 PE=1 SV=4	Hmga1	11.6	10.32	4845	64	244	11	0	8216.8	11729	9518.2	11212.9	9672.1	6451.2	9506.9	6866.2	10845.7	8925.9	7247.3	9366.5	7020.9	12984.2	9517.4	8298.7	11704.2	9557.5	10220.3	11376.9	6746.3	8660.2	2445.7	13784.8	10412.4	5656.7	9821.1	7261.4	10369.1	9739.4		1.05756	1.03305	0.876845	0.956056	1.09114	1.00293
935	935	3605	B2RRE7	OTU domain-containing protein 4 OS=Mus musculus OX=10090 GN=Otud4 PE=1 SV=1	Otud4	123	6.76	1346	17	76	13	0	380.8	546.2	378.8	432.7	724.2	337.8	609.3	342.6	483	780.1	374	650	327.6	482.5	464.9	385.8	672.5	498.4	557.1	796.5	346.5	610.4	213.8	470.5	517	386.9	595.9	379.6	469.9	708.7		1.108	0.978008	1.14535	0.972878	0.908473	1.02254
936	936	2644	P22682	E3 ubiquitin-protein ligase CBL OS=Mus musculus OX=10090 GN=Cbl PE=1 SV=3	Cbl	100.5	6.67	1221	16	63	9	0	782.3	763.4	196.3	822.6	734.8	777	970.4	164.8	935	880.7	786.8	1317.9	161.3	1208.5	551.4	763.1	976.6	215.8	1028.7	772.4	937.1	936.1	108.4	946.8	718.7	837.8	889.9	178.1	811.4	778.5		1.0807	0.917045	1.07825	0.867807	0.883956	0.965552
937	937	2799	O55131	Septin-7 OS=Mus musculus OX=10090 GN=Sept7 PE=1 SV=1	Sept7	50.5	8.57	691	30	51	12	0	223.6	67.7	447.1		133.4	226.6	102.2	624.3		134.2	260.7	108.9	680.1		148.5	224.1	73.6	481.5		133.3	274.2	129.4	3342.6		159.5	218.6	91	525.5		134.2		0.841743	0.890411	0.964695	NA	1	0.924212
938	938	4622	Q9DCW4	Electron transfer flavoprotein subunit beta OS=Mus musculus OX=10090 GN=Etfb PE=1 SV=3	Etfb	27.6	8.1	2402	50	110	12	0	478.9	396.7	843.3	220.8	474.6	596.1	516.2	1015.1	219.7	545.5	743.9	503.4	1049	286.6	918.3	445.3	341.7	898.1	206.1	451.9	1005.7	545.3	3909.3	236.3	981.2	592.3	442.3	961.4	224.4	477.3		0.947099	0.856838	0.993625	1.02139	0.874977	0.938786
939	939	2898	P10404	MLV-related proviral Env polyprotein OS=Mus musculus OX=10090 PE=1 SV=3	P10404	69.6	7.96	1856	14	108	8	0	1294.3	663.4	1326.3	2029	1533.2	1556.9	763.8	1386	1366.7	1495.6	1299.1	607.7	1357.2	1399.8	963.8	1395.3	481.2	896.6	2051	1662.8	535.9	578	346.7	1041.7	966.7	1555	669.4	1235	1662.5	1520.1		0.891053	0.876407	0.99878	1.21643	1.01638	0.999811
940	940	2934	P68433	Histone H3.1 OS=Mus musculus OX=10090 GN=Hist1h3a PE=1 SV=2	Hist1h3a	15.4	11.12	8448	62	780	9	2	8822.6	22940.8	15547.4	6924.1	4571.6	6521	11034.7	10351.6	8791	3815.7	3726.3	5415.7	4911.9	1806.2	2454.7	12856.3	17511.1	10829.6	3918.8	7514	803.4	7644.1	1080.6	5737.8	2100.3	4911	15898.3	13774.2	15579.6	4111.2		1.33063	1.44076	0.753105	1.77222	1.07744	1.27483
941	941	1930	Q91YQ5	Dolichyl-diphosphooligosaccharide--protein glycosyltransferase subunit 1 OS=Mus musculus OX=10090 GN=Rpn1 PE=1 SV=1	Rpn1	68.5	6.46	1279	24	70	14	0	312.8	259.6	536	372.6	87	402.7	283.6	572.6	341.2	126.8	515.3	403.7	567.8	228.1	210.5	420.7	275.8	599.2	327	103.3	445.1	373.2	2684.1	321.2	208.1	437.6	284.9	557.9	288.9	114.3		0.974328	1.00458	1.08667	0.846717	0.90142	0.962743
942	942	1671	Q8CHC4	Synaptojanin-1 OS=Mus musculus OX=10090 GN=Synj1 PE=1 SV=3	Synj1	172.5	6.89	1115	16	77	14	0	288.9	248.5	388.6	652.3	376.8	256.9	244.9	326.1	491.8	377.7	263.7	307.6	302.5	622.8	233	237.5	260.9	396.2	668.3	352.8	242.8	239.5	156.5	558.2	293.2	424.3	277.1	414	536.6	326.3		1.26955	1.13148	1.65162	1.09109	0.863913	1.20153
943	943	4496	O35892	Nuclear autoantigen Sp-100 OS=Mus musculus OX=10090 GN=Sp100 PE=1 SV=2	Sp100	54.7	8.66	2346	32	130	13	0	1692.6	982	1787.2	349.3	1191.2	4033.2	1207.3	3312.2	693.1	2486.6	3932.8	2342.1	3779.2	1227.2	4923	1468	720.7	1970.9	333.7	459.1	5638.3	1871.1	4103.5	1146	4536.4	2673.4	1161.3	2615.8	611.8	2960.5		0.789747	0.961898	0.662848	0.882701	1.19058	0.897555
944	944	1439	P35979	60S ribosomal protein L12 OS=Mus musculus OX=10090 GN=Rpl12 PE=1 SV=2	Rpl12	17.8	9.42	2604	64	132	8	0	1170.6	1903.3	2153.3	2632.4	1739	2153.1	2006.8	2731.8	2554.2	2275.7	3744.4	2900.7	3282.3	2189.8	6943.8	1732.4	1069.2	2433.4	2471.7	1830.3	2567.2	3959.7	6887.4	3341.8	6541	1754.1	1452.7	1531.4	2005.3	2004.1		0.560583	0.723889	0.814686	0.785099	0.880652	0.752982
945	945	4700	Q99L47	Hsc70-interacting protein OS=Mus musculus OX=10090 GN=St13 PE=1 SV=1	St13	41.6	5.26	1660	30	99	11	0	707.4	523.3	710	344.3	470.4	1353.4	599.1	1120.2	573.2	825.4	2016.5	888	1401.3	487	2081.9	964.8	359.1	835.5	321.6	487.8	2285.7	1012.4	2601.2	617.5	1985.8	1062.4	459	636.4	418.5	712		0.568113	0.766149	0.784986	0.730112	0.862612	0.742394
946	946	1181	Q9CY02	Alpha-hemoglobin-stabilizing protein OS=Mus musculus OX=10090 GN=Ahsp PE=1 SV=1	Ahsp	11.8	4.74	8420	57	538	7	0	10604.2	7478.9	13693.7	17205.1	14061.6	6346	5187.7	15145.3	8476.5	7382.5	3763.5	8013.3	10189.1	7175.8	5945.5	7829.3	3890.3	9219.3	10949.2	10555.6	3788.8	6910	1328	5833.3	3237.6	15044.2	7681.6	17343.8	15509.1	12092.9		1.14516	1.48073	2.37066	1.82966	1.63805	1.69285
947	947	3560	Q9D937	Uncharacterized protein C11orf98 homolog OS=Mus musculus OX=10090 PE=1 SV=1	Q9D937	14.1	11.47	1798	38	117	6	0	2231.7	5170.5	3793.2	1244.9	1115.6	1888.6	4607.8	3279.9	1286.3	728.3	1035	3663	3367.7	760.7	463.1	2763.4	5319.2	3471.9	1294.2	1494.1	1402.6	3680.4	1080.6	1067.3	475.5	1720.2	5353.8	3692.2	1298.1	732.2		1.12571	1.1619	0.910833	1.00917	1.00535	1.04259
948	948	3705	Q9Z0F7	Gamma-synuclein OS=Mus musculus OX=10090 GN=Sncg PE=1 SV=1	Sncg	13.2	4.65	1271	85	84	11	0	655.3	130	181.6	259.1	680.2	876.5	237.2	225	343.3	797	954.2	261.7	299.7	541.4	1022.9	549.3	173.6	190.6	288.7	640.9	1632.2	246.6	210.8	551.6	1221.4	704	272.4	222.4	276.3	777.9		0.988444	1.1484	0.803195	0.804835	0.976035	0.944181
949	949	2861	Q9D7Z3	Nucleolar protein 7 OS=Mus musculus OX=10090 GN=Nol7 PE=1 SV=1	Nol7	29	9.61	1693	22	111	8	0	1115.2	809.9	592.4	1574.2	507.5	1169.5	875.7	837.9	2091.8	824.7	1070.2	1130.1	705.5	2103.1	263.1	1033.3	716	585.2	1593.7	458.4	551	771.6	136.4	1377	295.4	1201.8	977.2	597.7	2109.5	659.5		0.713331	1.11591	1.02762	1.00846	0.799685	0.933001
950	950	687	P41241	Tyrosine-protein kinase CSK OS=Mus musculus OX=10090 GN=Csk PE=1 SV=2	Csk	50.7	7.06	637	38	43	14	0	28.2		258.7		72.4	29.2		286.3		116.8	68		313.6		472.7	25.9		287.3		72.2	81		1487.1		446	36.3		216.1		96.6	Acetyl [N-Term]	0.754803	NA	1.24315	NA	0.827055	0.941669
951	951	1273	Q9D7P6	Iron-sulfur cluster assembly enzyme ISCU, mitochondrial OS=Mus musculus OX=10090 GN=Iscu PE=1 SV=1	Iscu	18.1	9.29	2476	58	155	10	0	4280	4468.3	2674.9	3317.1	3739.9	3839.1	4666.5	3040.1	3162.9	3694.2	2891.1	4049.9	2793	2765	2408.1	4015.6	4330.8	2674.4	3196.6	3577.5	2522.3	3709.5	923.6	2724.4	2500.4	3591.3	4291.1	2701	3053.7	3726		0.888458	0.919554	0.935454	0.965475	1.00861	0.94351
952	952	2131	Q9CR51	V-type proton ATPase subunit G 1 OS=Mus musculus OX=10090 GN=Atp6v1g1 PE=1 SV=3	Atp6v1g1	13.7	7.97	4107	44	142	8	0	1326.5	2025.2	1572.1	1928.4	3014.9	1258.2	2020.7	1681.3	2170	3194	1094.4	3184.3	1637.8	2801.6	2764.8	1163.6	1845.1	1807.7	1851	2626.7	1376.3	2442.9	655.6	2310.7	3570.8	1439.3	2501.6	1711.9	2279	3231.6	Acetyl [N-Term]	1.0182	1.23799	1.14394	1.05023	1.01177	1.09243
953	953	4437	Q9WU40	Inner nuclear membrane protein Man1 OS=Mus musculus OX=10090 GN=Lemd3 PE=1 SV=2	Lemd3	100.2	7.55	1143	17	56	8	0	133.7	54.9	30.5	138.9	42.7	100.2	57.1	29	139.9	68.7	89.1	66.1	35.5	164.2	38.3	101.3	67.4	33.3	154.5	54.9	74.1	68.1	26.5	133	42.3	103.2	62	35.3	120.4	48.8	Acetyl [N-Term]	1.21724	1.08581	1.02994	0.860615	0.710335	0.980789
954	954	879	P02798	Metallothionein-2 OS=Mus musculus OX=10090 GN=Mt2 PE=1 SV=2	Mt2	6.1	7.83	2317	67	99	4	0	1033.6	995.4	732.2	3620	5788.4	827.4	1109.2	473.2	1463.3	2399.9	300.2	389.2	279	911.8	410.5	1339.4	1053.7	551.2	5732	3824.1	192.8	618.9	33.4	1230.6	432.7	1355.2	1118.8	613.4	1475.6	1469.8	Acetyl [N-Term]	1.29628	1.00865	1.6379	1.00841	0.612442	1.11274
955	955	3504	Q63810	Calcineurin subunit B type 1 OS=Mus musculus OX=10090 GN=Ppp3r1 PE=1 SV=3	Ppp3r1	19.3	4.81	1665	58	101	9	0	1904.3	1195.5	1629.7		2322.3	2140.9	938.4	873.6		1924.6	2800.9	597.2	1158.3		2403.2	3003.8	955.8	1778.7		1703.5	3185.3	1055	559		1648.3	1750.6	904.5	1330.5		2022.2		1.52301	0.963875	0.817693	NA	1.05071	1.08882
956	956	3817	Q9D8Z2	TP53-regulated inhibitor of apoptosis 1 OS=Mus musculus OX=10090 GN=Triap1 PE=1 SV=1	Triap1	8.8	5.48	2904	80	152	9	0	3529	3217.6	3014.2	3027.3	3111.5	2841.7	2860.8	1935.6	2674	2501.6	2212.9	2220.6	1747.1	2499.6	1311.8	3548.2	3923.5	3034.3	3415.3	3078.8	1871.6	2335.5	484.7	2263.6	1295.8	3062.1	2884.8	2646.9	2708.7	2572.4	Acetyl [N-Term]	1.36748	1.00839	1.07756	1.01298	1.0283	1.09894
957	957	1605	Q9Z2U1	Proteasome subunit alpha type-5 OS=Mus musculus OX=10090 GN=Psma5 PE=1 SV=1	Psma5	26.4	4.79	2343	37	99	8	0	529.4	392	796.5	355.9	614	615.9	396.6	836.1	344.9	726.1	980.3	667.9	981.1	338.4	1508	637.4	335.5	926.5	519.3	706.7	1177.6	759.9	3572	482.3	1525.7	601.8	311.2	869.3	310.3	659.5		1.03971	0.78467	0.977107	0.899681	0.908277	0.921889
958	958	132	Q922B2	Aspartate--tRNA ligase, cytoplasmic OS=Mus musculus OX=10090 GN=Dars PE=1 SV=2	Dars	57.1	6.49	1203	31	83	15	0	357.4		811.4	36.8	51.1	513.4		1080.8	34.4	80.2	751.5		1164.2	32.6	365.2	465.9		1024.7	33.6	87.9	822.6		3572.4	20.6	324	445.7		860.2	18.1	80.1		0.795892	NA	0.868134	0.526163	0.998753	0.797235
959	959	1876	Q9D2V7	Coronin-7 OS=Mus musculus OX=10090 GN=Coro7 PE=1 SV=2	Coro7	100.7	5.77	599	29	40	15	0	18.7		253.7		29.4	37.3		273.7		48.1	70		313.8		100.1	33.3		261.8		28.4	92.6		1032.6		108.5	27.9		221.7		47.1		0.810011	NA	0.747989	NA	0.97921	0.845737
960	960	1837	Q9QZQ8	Core histone macro-H2A.1 OS=Mus musculus OX=10090 GN=H2afy PE=1 SV=3	H2afy	39.7	9.8	1173	40	72	11	0	105.5		504.5		16.3	94.6		497.3		69	237.4		528.9		315.3	106.5		640		29.2	225.9		2972.7		285.3	108.9		502.3		34.9		1.01005	NA	1.15116	NA	0.505797	0.889005
961	961	4024	Q9EPQ8	Transcription factor 20 OS=Mus musculus OX=10090 GN=Tcf20 PE=1 SV=3	Tcf20	215.6	8.98	718	11	51	15	0	78.5	92.9	210.2	29.2	177.2	96.6	152.9	226.4	34.2	175.6	72.3	148.6	206.3	33.4	196	87.2	126.7	256.6	26.2	173.3	58.3	129.1	167	28.1	205.1	101	118.6	239.9	31	172		1.05963	0.77567	1.04555	0.906433	0.979499	0.953356
962	962	2986	Q80U58	Pumilio homolog 2 OS=Mus musculus OX=10090 GN=Pum2 PE=1 SV=2	Pum2	114.2	7.08	1252	15	89	14	1	1308.4	1642	1314.1	406.9	1150.9	1255.6	1775.6	1070	329.2	1207.6	1116.4	1767.4	1249.5	419.9	824.7	1250	2138.4	1412.2	401.4	1114.4	855.2	1644.4	316.6	335	833.8	1335.3	1730.6	1379.7	367.1	1175.5	Acetyl [N-Term]	1.28944	0.974656	1.06348	1.11513	0.973418	1.08322
963	963	1208	Q5XJE5	RNA polymerase-associated protein LEO1 OS=Mus musculus OX=10090 GN=Leo1 PE=1 SV=2	Leo1	75.6	4.46	1686	19	89	11	0	630.2	2235.3	940.2	173.6		844.4	2273.9	971.2	289.7		1022.1	1962.5	884.5	203.3		1197.4	2354.6	957.2	125.8		498	1782.4	365.9	458.9		403.2	2354.6	1021.1	273.5			1.05138	1.03549	0.477499	0.94408	NA	0.877112
964	964	2213	P60766	Cell division control protein 42 homolog OS=Mus musculus OX=10090 GN=Cdc42 PE=1 SV=2	Cdc42	21.2	6.55	2106	48	132	9	1	1499.4	2387.9	2093	1117.7	1008.6	2386.2	3134.8	2645.6	1459	1238.5	2678.2	3369.6	2427.8	1043.4	2144.8	1769.1	1324.2	2333.5	709.9	978.8	4555.8	3861	8988.8	1778.8	2169.5	2390.4	2218.5	2240.3	1289.7	1218.4		0.846802	0.707701	1.00176	0.883962	0.983771	0.884799
965	965	1753	P14434	H-2 class II histocompatibility antigen, A-B alpha chain OS=Mus musculus OX=10090 GN=H2-Aa PE=1 SV=2	H2-Aa	28.1	4.78	2317	31	124	5	0	2134	876.9	1692.7	1222.9	629.1	4150	1755.9	4431.9	3669.6	1735.7	5209.9	2767	4671.4	3670.4	4449.5	1993.4	630.9	2602.6	1056.1	690.7	7438	2084.8	8543.2	4515.9	4963.1	3283.3	1259.8	3760.8	2930.3	1522		0.848575	0.717467	0.791157	0.798534	0.87688	0.806522
966	966	2227	P26638	Serine--tRNA ligase, cytoplasmic OS=Mus musculus OX=10090 GN=Sars PE=1 SV=3	Sars	58.4	6.3	853	37	64	13	0	105.7	29.3	237.6	45.6	11.4	136	26.7	281.8	43.5	29.6	225.2	42.8	329.2	33.6	132.4	119.9	17.7	279.4	43.5	18.4	274.1	78.4	1508.1	50.6	154.3	134.7	19.5	138.8	36.2	26.7		0.492548	0.730337	0.990441	0.832184	0.902027	0.789507
967	967	4380	Q6DFW4	Nucleolar protein 58 OS=Mus musculus OX=10090 GN=Nop58 PE=1 SV=1	Nop58	60.3	8.34	558	30	67	12	0	741.8	141.1	701.7	489.8	836.4	1064.7	157.6	844.6	790.3	1356.7	1301.6	155.9	1002.5	592	1644.9	828.4	119.9	780.9	447.9	851.5	1220.2	206.8	2863	691.5	1739.6	1137.8	165.3	714	560	1281.4		0.845371	1.04886	1.06866	0.708592	0.944498	0.923195
968	968	482	P63028	Translationally-controlled tumor protein OS=Mus musculus OX=10090 GN=Tpt1 PE=1 SV=1	Tpt1	19.5	4.86	4610	40	428	6	0	9819.2	2581.5	7020.2	7977.2	7543.5	10731	2374.9	8985.9	7899.8	7433.2	11853.1	3733	11562.1	10865.1	9623.1	8540.3	1675.8	7043.7	7726.1	6943.3	8526.1	2950.9	3935	11707.6	8771.4	8856.8	2097.3	5446.3	8674.8	8866		0.606094	0.883111	0.825347	1.0981	1.19276	0.921083
969	969	677	Q00651	Integrin alpha-4 OS=Mus musculus OX=10090 GN=Itga4 PE=1 SV=1	Itga4	115.6	6.73	1500	17	107	14	0	883.8	484.2	1260.3	559.7	840.1	913.5	480.4	1242.3	529.9	727.8	841.4	402	1045	385.1	870.9	898.2	261.5	1247.2	348.5	796.7	682.7	449.5	685.9	598.1	741.7	1173.9	395.7	1461	603.9	847.2		1.17604	0.823689	1.28506	1.13965	1.16406	1.1177
970	970	4384	Q01965	T-lymphocyte surface antigen Ly-9 OS=Mus musculus OX=10090 GN=Ly9 PE=1 SV=2	Ly9	73.1	7.33	895	28	62	13	0	309.6	124.6	280.8	473.8	208.5	434.2	124.6	372.3	450.9	301.8	382	155.7	382.9	736.3	179.3	283.1	131.4	354.9	446.6	220.3	383.7	133.9	309.2	496.7	228.1	379.9	136.6	412.6	441.1	277.1		1.10825	1.09631	0.874942	0.978266	0.918158	0.995184
971	971	3978	Q3UIA2	Rho GTPase-activating protein 17 OS=Mus musculus OX=10090 GN=Arhgap17 PE=1 SV=1	Arhgap17	92.1	7.56	2288	25	109	12	0	848	835.8	1012.8	1709.1	1214.9	922.8	1059.1	982.1	1857.4	1526.1	796	1320.2	1039.2	2586.5	857.3	645.2	947.4	1152.4	1803.1	1521.6	1096.7	1122.4	647.7	1650.5	1070.7	975	1077.3	1135.6	1700.5	1452.1		1.1563	1.01718	1.05657	0.915527	0.95151	1.01942
972	972	2893	Q8C263	Spindle and kinetochore-associated protein 3 OS=Mus musculus OX=10090 GN=Ska3 PE=2 SV=1	Ska3	45.3	5.26	997	45	72	13	0	832.6	613.2	58.9	402.3	240.2	684.6	483.1	59.4	417.6	184.8	581.6	500	55.5	388.7	87.4	603.2	581.5	57.7	384.1	146.5	309.3	394.2	25.2	324.4	85.1	816.8	721	55.2	480.3	235.3		0.929293	1.49244	1.19311	1.15014	1.27327	1.20765
973	973	3152	Q8BWT1	3-ketoacyl-CoA thiolase, mitochondrial OS=Mus musculus OX=10090 GN=Acaa2 PE=1 SV=3	Acaa2	41.8	8.09	1036	46	54	12	0	53.1		79.3		47.7	76.6		124.2		64	102		123.9		119.1	73.4		100.2		44.5	132.8		781.6		140.1	76.5		78.9		56		0.635266	NA	0.998695	NA	0.875	0.83632
974	974	4019	O70370	Cathepsin S OS=Mus musculus OX=10090 GN=Ctss PE=1 SV=2	Ctss	38.4	6.96	1200	30	71	8	0	331.1	58.6	420.9	26.6	132.4	284.9	65	319.7	35.5	162.6	288.7	83.9	312.5	31.5	223.8	288.1	88.2	430.8	36.8	137.7	534.9	85.9	1377.2	30.6	311.9	407.7	44.8	431	32.3	112.3		1.34814	0.689231	1.43103	0.909859	0.690652	1.01378
975	975	3666	Q6PB51	Coiled-coil domain-containing protein 117 OS=Mus musculus OX=10090 GN=Ccdc117 PE=1 SV=1	Ccdc117	30.4	5.88	2710	38	90	10	0	781	1204.2	633.2	242.3	693.6	695.6	1056.2	448.6	252.6	581.7	585.4	742.8	406	248.7	453	938.9	1273.3	634.2	227.4	677	388.9	786.2	219.2	215.7	368.6	745.9	1070	589.3	280.7	569.8		1.31364	1.01307	1.07231	1.11124	0.979543	1.09796
976	976	4643	Q8K1I7	WAS/WASL-interacting protein family member 1 OS=Mus musculus OX=10090 GN=Wipf1 PE=1 SV=1	Wipf1	50.1	11.41	1944	37	198	13	0	5439.4	2742.5	3588.3	6345.9	4864.6	5410.3	3209.1	3291.5	5677.5	4758.3	5629.3	3418.3	3590.4	7457.1	3577.9	5118.7	3465.1	3464.2	6847.5	5040.4	6514.5	3072.1	1304.7	5656.6	4095.8	4899.5	3002.6	3285.1	5266.9	4670.1		0.998056	0.935652	0.905587	0.927679	0.981464	0.949688
977	977	4229	Q8BHK9	DNA excision repair protein ERCC-6-like OS=Mus musculus OX=10090 GN=Ercc6l PE=1 SV=1	Ercc6l	138.8	5.21	1598	13	78	11	0	484.6	617.3	153.9	628.4	208	437.9	797.5	137.3	589.2	208.9	360.1	625.7	163.2	548.9	147.4	411.3	595.8	180.6	649.3	224.2	257.9	692	60.4	534.4	135.5	528.7	706.4	138.6	586.8	203.9		1.00947	0.885768	1.20735	0.995927	0.976065	1.01492
978	978	2962	Q9D0B0	Serine/arginine-rich splicing factor 9 OS=Mus musculus OX=10090 GN=Srsf9 PE=1 SV=1	Srsf9	25.6	8.65	4104	43	199	11	0	6138.7	4800.4	3101.1	4182.3	4635.8	4998.9	4537.8	2455.2	3483.2	4210.6	4691.4	3558.9	2649.1	3623.2	2678.3	5618.7	4624.6	3158.6	4103.4	4810.5	3497.2	3939.8	1658.1	3287.5	2781.5	5098.9	4302	2834.4	3780.7	4634.2		1.15445	0.948036	1.02	1.08541	1.1006	1.0617
979	979	3572	P59759	MKL/myocardin-like protein 2 OS=Mus musculus OX=10090 GN=Mkl2 PE=1 SV=1	Mkl2	117.5	6.16	1052	16	95	14	1	637.6	1178.6	501.9	911.3	830.7	729.8	1297.4	571.4	883.7	947.1	494.4	1092.4	565.5	936	532.4	644.8	1160.8	561.5	914	734.9	618	1114.4	472.2	799.8	660.6	614.3	1173.3	514.6	884.9	839.7		0.900595	0.904347	0.841737	1.00136	0.886601	0.906928
980	980	3253	D3YZP9	Coiled-coil domain-containing protein 6 OS=Mus musculus OX=10090 GN=Ccdc6 PE=1 SV=1	Ccdc6	52.9	7.34	1572	29	110	12	0	1602.2	445.9	487.3	446.4	1313.7	1645	447.8	999.1	587.3	1682.7	1362.1	960.8	1075.3	666.7	1498.5	1363.8	337.3	485.8	327.7	1448.7	1291.3	643.1	378.6	582.2	1453.5	1881.5	515.6	844.3	652.5	1790.2		0.845061	1.15141	1.14377	1.11102	1.06389	1.06303
981	981	2572	Q99M54	Cell division cycle-associated protein 3 OS=Mus musculus OX=10090 GN=Cdca3 PE=1 SV=2	Cdca3	28.7	5.81	1603	52	98	11	0	365	837.2	716	1383.4	640.2	221.9	589.1	450.3	612.4	296.1	190.5	643.1	454.7	853.8	155.2	234.4	911.1	555.1	1088	308.3	90.4	519.5	236.3	518.5	140.7	394	954	813.7	989.1	404.8		1.80702	1.61942	1.77557	1.61512	1.36711	1.63685
982	982	3559	B1AQJ2	Ubiquitin carboxyl-terminal hydrolase 36 OS=Mus musculus OX=10090 GN=Usp36 PE=1 SV=1	Usp36	119.8	9.82	704	20	43	13	0	75.8	102	262		37.8	76.3	130.7	176.5		27.6	118.6	150.7	205.2		31.4	77.2	115.9	270.2		18.9	153.2	146.7	28.8		24.4	69.9	131.6	254.2		31.3		1.44023	1.00689	0.916121	NA	1.13406	1.12432
983	983	3950	P24668	Cation-dependent mannose-6-phosphate receptor OS=Mus musculus OX=10090 GN=M6pr PE=1 SV=1	M6pr	31.2	5.39	1903	37	119	10	0	2514	2277.8	2366.3	1162	1305.3	3951.2	2557.7	3586.6	1135.7	2316.8	4365.8	3693.6	4145.8	1631.6	4058.4	2431.7	1331.4	2752.4	865.1	1212.6	5138.2	3640.5	4220.2	1903.3	3885.9	2655.1	1858.8	2593.7	1101	1983.2		0.723164	0.726747	0.671973	0.969446	0.856008	0.789468
984	984	4575	Q8K039	Uncharacterized protein KIAA1143 homolog OS=Mus musculus OX=10090 PE=1 SV=1	Q8K039	17.5	8.48	2140	75	145	13	0	4097.8	3424.4	3239.9	5930.4	3760.4	3305	3273	2597	4372.5	3053.6	2647.5	2690.4	2554.3	4387.2	1652.1	3875.6	3921.4	3007.6	5809.6	4234	2483.2	2578.2	691.1	3543.8	1736.2	3633	3515.9	3215.8	5284.3	3220.4		1.23827	1.07421	1.09924	1.20853	1.05462	1.13498
985	985	3704	Q4VA53	Sister chromatid cohesion protein PDS5 homolog B OS=Mus musculus OX=10090 GN=Pds5b PE=1 SV=1	Pds5b	164.3	8.5	1112	9	72	15	1	547.7	546.9	381	318.1	622.7	552	723.7	418.2	454.7	784.8	537.7	767.1	443.2	421.5	519.3	466.8	645.8	436	377.7	613.5	434.7	786.2	412.7	373.1	527.9	580.4	683.5	357	408.5	657.2		0.853659	0.944452	1.05145	0.898395	0.837411	0.917073
986	986	192	Q99MR6	Serrate RNA effector molecule homolog OS=Mus musculus OX=10090 GN=Srrt PE=1 SV=1	Srrt	100.4	5.97	1082	18	64	14	0	114.7	351.9	260.8	43.6	7.7	148.8	440.8	349	106.5	33.3	169.3	489.3	352.1	47.2	62	106	268.7	363.8	35.8	15	162.1	506.9	758.6	74.9	54.2	137	309.4	344.7	84.9	23.1		0.987679	0.701906	0.920699	0.797183	0.693694	0.820232
987	987	1298	Q9QYB5	Gamma-adducin OS=Mus musculus OX=10090 GN=Add3 PE=1 SV=2	Add3	78.7	5.95	930	23	63	11	0	388.5	559.3	245.4	54.8	494.7	456.7	594.1	209.2	66.7	530.8	558.3	515.8	259	70.4	540.7	478.2	740.2	293.8	48.7	414.2	656.4	660	545.3	68.4	535	463.9	540.9	242.8	58.1	534.2		1.16061	0.910453	1.01577	0.871064	1.00641	0.99286
988	988	3731	Q8CC35	Synaptopodin OS=Mus musculus OX=10090 GN=Synpo PE=1 SV=2	Synpo	99.5	9.42	1305	18	89	11	0	527.2	334.7	381.7	726	446.2	563.1	490.2	513.2	1080.7	658.8	505.7	530.7	465	1077.8	445	512.8	381.5	418.5	973.6	524.8	773.4	490.9	238.2	1019.6	525.1	591.7	466.1	437.3	886.1	516		0.852104	0.950836	1.05079	0.819932	0.783242	0.891381
989	989	412	P14148	60S ribosomal protein L7 OS=Mus musculus OX=10090 GN=Rpl7 PE=1 SV=2	Rpl7	31.4	10.89	995	44	92	14	0	399.8	1123.7	2951.1	456.3	157.1	517.6	840.1	2235	705.6	211.9	762	901.4	1981.8	453.4	216	603.9	644.9	2812	481.2	165.2	322.1	1093.8	3847.4	567.8	170.2	565.4	682.2	2077.5	563.4	199.4		0.92953	0.812046	1.09235	0.798469	0.94101	0.914681
990	990	3183	P56873	Sjoegren syndrome/scleroderma autoantigen 1 homolog OS=Mus musculus OX=10090 GN=Sssca1 PE=1 SV=1	Sssca1	21.3	5.12	1283	75	99	8	0	530.9	772.8	353.1	471.5	492.7	624.3	838.3	626.5	892.8	732.7	639.2	890.3	787.2	833.4	604.6	628.7	601.4	467.6	725.7	516	273.7	828	197.9	1103.2	655.8	464.7	610.2	335.5	708.4	625.3	Acetyl [N-Term]	0.535515	0.727902	0.744354	0.793459	0.853419	0.73093
991	991	1249	Q62241	U1 small nuclear ribonucleoprotein C OS=Mus musculus OX=10090 GN=Snrpc PE=1 SV=1	Snrpc	17.4	9.67	3172	31	186	6	0	6958.5	2852.3	5088.2	5648.3	6276.4	5449.8	2883.4	4458.4	4640.6	5973.2	4851.1	2439.9	4435.6	5240.1	3289.7	6106.5	2954.1	5391.6	6082.5	7590.2	3424.3	2251.4	1060	4497.8	3815.8	5546.7	2597.8	4163.6	4829.1	5882.2		0.933878	0.90095	1.01778	1.04062	0.984765	0.975599
992	992	4315	P21614	Vitamin D-binding protein OS=Mus musculus OX=10090 GN=Gc PE=1 SV=2	Gc	53.6	5.5	1615	34	106	13	0	579.8	608.8	954.4	456.8	409.4	487.5	602.1	868.1	249.9	379	462	436.9	996.4	283.1	613.1	427.2	703.3	897.7	465.9	474.4	625.4	631.5	2373.4	389	528.1	811.4	550.5	811.9	257.4	320.2		0.935261	0.9143	1.66441	1.03001	0.844855	1.07777
993	993	3042	Q9D8S3	ADP-ribosylation factor GTPase-activating protein 3 OS=Mus musculus OX=10090 GN=Arfgap3 PE=1 SV=2	Arfgap3	57.4	8.47	1146	23	50	11	0	189.6	183.5	45.5	176.9	26.7	180.7	94.7	54.1	142.6	23.2	164.3	89.6	37.8	166.3	6.2	194.4	91.9	37.1	158.7	27.2	190.7	99.9	83.9	130.8	17.5	231.3	99.1	67.7	155.6	26.1		1.25139	1.04646	1.28002	1.09116	1.125	1.15881
994	994	2516	Q8R149	BUD13 homolog OS=Mus musculus OX=10090 GN=Bud13 PE=1 SV=1	Bud13	72.1	9.95	1920	19	87	12	0	564	954	740.8	577	124.8	565.5	1011.3	713.6	660.5	143.1	514.5	1097.8	703.5	756.1	93.2	562.5	893.7	801.8	596.9	121.4	380.1	973.6	490.6	561.3	122.2	581.6	1022.1	802.7	670.4	164.3		1.12486	1.01068	1.02847	1.01499	1.14815	1.06543
995	995	607	P23708	Nuclear transcription factor Y subunit alpha OS=Mus musculus OX=10090 GN=Nfya PE=1 SV=2	Nfya	36.8	8.94	2920	14	175	4	0	2719.2	1240.2	2311.2	4373.9	2355.7	2227.5	1267.5	2193.7	3834.3	1938.9	1642.4	1070.5	2061.8	3580.3	769.9	2221.3	1462.4	2449	4183.3	2924.9	1255.8	948	311.4	3002.5	894.5	2561.1	1216.3	2364.6	4065.6	2087		1.0779	0.959606	1.14976	1.06032	1.07638	1.0648
996	996	674	P70290	55 kDa erythrocyte membrane protein OS=Mus musculus OX=10090 GN=Mpp1 PE=1 SV=1	Mpp1	52.2	7.2	792	28	66	10	0	216.5		258.6	358.5	174.7	283.8		424.8	204.5	167.3	213.1		331.2	252.6	144.2	222.5		308	228.9	141.9	305.2		589.4	206	155.5	315.2		327	187.9	151.8		0.769774	NA	1.11064	0.918826	0.907352	0.926648
997	997	2627	Q9JKP5	Muscleblind-like protein 1 OS=Mus musculus OX=10090 GN=Mbnl1 PE=1 SV=1	Mbnl1	37	8.6	1120	36	107	9	0	1249.7	603.8	1303	2130.4	2156.6	1204.7	814.1	1167.6	2358.5	3081.7	1366.8	573.2	1120.3	2085.4	1689.1	1383.7	478.7	1481.9	3165.9	2909.3	1097.3	602	1656.2	2192.1	1910.2	1277.3	591.5	1174	2125.1	2476.1	Acetyl [N-Term]	1.00548	0.726569	1.06026	0.901039	0.803485	0.899368
998	998	2242	Q9CWU4	UPF0690 protein C1orf52 homolog OS=Mus musculus OX=10090 PE=1 SV=1	Q9CWU4	20.1	5.11	2796	57	157	10	0	3605.7	2797	1376.5	4396.5	3904.2	3254.5	2938.9	1161.2	3947	3392.5	2618.5	2636.1	1072.4	4135.7	1865.7	3158.6	3387.4	1391.2	4718.1	3885.6	1970.6	2368.4	351.6	3168	1910.6	3223.8	3147.3	1343	4155	3402.9		1.15656	1.07091	0.990567	1.0527	1.00307	1.05476
999	999	2828	Q6PFD9	Nuclear pore complex protein Nup98-Nup96 OS=Mus musculus OX=10090 GN=Nup98 PE=1 SV=2	Nup98	197.1	6.18	1778	9	89	12	0	537.9	312.8	201.3	443.9	316.5	607.3	298.5	236.8	451.2	361	593.9	306.6	243	402.1	333.3	639	329.6	221.6	478	254.3	497.8	333.4	197.2	344	311.5	543.8	314.4	230	454.7	316.1		0.971284	1.05327	0.895439	1.00776	0.875623	0.960674
1000	1000	955	Q569Z5	Probable ATP-dependent RNA helicase DDX46 OS=Mus musculus OX=10090 GN=Ddx46 PE=1 SV=2	Ddx46	117.4	9.26	516	16	59	17	0	626.6	368.1	570.5	129	243.9	679.5	487.2	570.3	127.6	282.3	807.7	529.4	630.1	153.5	334	693.8	477.7	652	142.4	259.3	954.4	518.1	608.6	144.8	301.3	631.8	463.2	593.1	134.5	269.8		1.03998	0.950739	0.929801	1.05408	0.955721	0.986063
1001	1001	2966	Q8BG95	Protein phosphatase 1 regulatory subunit 12B OS=Mus musculus OX=10090 GN=Ppp1r12b PE=1 SV=2	Ppp1r12b	109	5.74	1834	7	89	7	0	394.6	825	285.2	613.7	310.3	633.4	1060	376.2	738.7	448.1	626.4	1053.5	374.8	1007.2	569	416	744	330.7	587	303.2	980.7	1170.4	419.6	877.8	600.1	546.1	1119	355.4	654.5	428.2		0.94471	1.05566	0.862172	0.886016	0.95559	0.94083
1002	1002	4302	Q5UAK0	Mesoderm induction early response protein 1 OS=Mus musculus OX=10090 GN=Mier1 PE=1 SV=2	Mier1	57.9	4.45	1158	30	66	13	0	263.9	403.1	169.3			338.1	388.5	234.9			318.2	386.3	253.6			315.3	328.6	166.8			294.8	431.7	358.8			294.3	420.2	215.1				0.915709	1.0816	0.870453	NA	NA	0.955919
1003	1003	3194	O88685	26S proteasome regulatory subunit 6A OS=Mus musculus OX=10090 GN=Psmc3 PE=1 SV=2	Psmc3	49.5	5.19	630	37	65	12	0	329.3	113.8	505	28.9	122.1	476.3	130.5	743.9	38.4	202.7	774.9	196.6	897.5	27.9	583.2	494.9	62.7	601.6	21.5	136	755.6	260.5	2553.6	65.2	554.9	383.5	107.4	401.3	28.3	180.5		0.539454	0.822989	0.805165	0.736979	0.890479	0.759013
1004	1004	4610	O55201	Transcription elongation factor SPT5 OS=Mus musculus OX=10090 GN=Supt5h PE=1 SV=1	Supt5h	120.6	5.05	543	17	37	11	0	299.2	69.4	131.6	94.6	59.5	417.3	112.1	214.2	183.4	106.6	507.9	224.9	252	248.7	82.9	288.1	58.4	189.1	123.6	43.2	594	169.4	310.5	181.1	112.5	401.9	76.6	168.5	163.6	99.8		0.786648	0.683318	0.963096	0.892039	0.93621	0.852262
1005	1005	3853	O55029	Coatomer subunit beta' OS=Mus musculus OX=10090 GN=Copb2 PE=1 SV=2	Copb2	102.4	5.3	423	22	34	15	0	82.6		229		26.9	134.4		253.8		24.9	197.5		308.3		37.7	103.5		239.3		16.5	276.4		1032.7		38.1	127.6		195.4		22.9		0.769898	NA	0.949405	NA	0.919679	0.87966
1006	1006	453	Q08091	Calponin-1 OS=Mus musculus OX=10090 GN=Cnn1 PE=1 SV=1	Cnn1	33.3	8.97	1955	28	93	6	0	330.4	423.3	566	443.4	511	290.9	505.6	700.9	379.4	613.5	275.4	514.9	736.9	408.3	578.3	264.8	387.7	575.6	387.8	600.8	412.5	673.3	960.2	339.6	506.7	340.4	1169.6	638.4	369.3	514.4		0.910829	2.31329	1.17016	0.973379	0.838468	1.24123
1007	1007	1426	Q60631	Growth factor receptor-bound protein 2 OS=Mus musculus OX=10090 GN=Grb2 PE=1 SV=1	Grb2	25.2	6.32	2387	47	93	8	0	969.6	499.1	765.1	465.4	1063	957.2	530.9	866.5	438.1	1430.2	1211	625.9	913.5	585.3	2039.1	810.5	428	901	483.2	1026.6	1184.7	684.3	1983.8	587.8	2110	1051.9	465	701.2	415.5	1242.2		0.809233	0.875871	1.09893	0.948414	0.86855	0.9202
1008	1008	3461	Q60520	Paired amphipathic helix protein Sin3a OS=Mus musculus OX=10090 GN=Sin3a PE=1 SV=3	Sin3a	145	7.25	1807	10	123	10	0	421.2	404.1	217.3	347.8	624.4	472.5	506.2	274.3	416.5	771.8	439.1	535.7	286.7	445.7	529.1	423.4	432.4	271.3	370.5	605.6	369.2	498.2	186.6	418	616.2	460.9	470.5	190.5	401.8	619.6		0.694495	0.929475	0.97545	0.964706	0.802799	0.873385
1009	1009	2394	Q9DAK9	14 kDa phosphohistidine phosphatase OS=Mus musculus OX=10090 GN=Phpt1 PE=1 SV=1	Phpt1	14	5.53	1655	85	105	10	0	1491.9	946.6	841.9	1212.5	740.5	1450.9	1316.2	978.8	1089.8	891.1	2067.8	1371	1228.1	1293.1	1276.8	1661.9	867.6	986.6	1394.3	807.7	2025.1	1299.5	1720.9	1860.6	1365.3	1127.5	1076.3	738.3	1107.5	895	Acetyl [N-Term]	0.754291	0.817733	0.777104	1.01624	1.00438	0.873949
1010	1010	86	Q8K1J5	Replication stress response regulator SDE2 OS=Mus musculus OX=10090 GN=Sde2 PE=1 SV=1	Sde2	48.6	5.66	930	42	105	17	0	1446.5	1333.5	589.1	1102.2	1651.8	1593.7	1481.6	828.8	1341.3	1617.6	1219.4	1416.5	825.3	1108.4	989.9	1544.5	1285.1	716.1	1186.6	1670.3	1148	1258.4	272.9	1084.5	1151.8	1549.1	1555.7	849.7	1268.3	1568.9		1.02522	1.05001	0.972015	0.945575	0.969894	0.992543
1011	1011	3482	Q2KN98	Cytospin-A OS=Mus musculus OX=10090 GN=Specc1l PE=1 SV=1	Specc1l	124.4	5.76	511	18	45	17	0	77.7	122.2	173.2	113.3	53.9	73.9	128.7	207.6	130.8	64.2	57.6	135.3	170.1	143.1	37.2	57.9	91.3	201.5	124.8	44.4	72.4	129.8	88.5	120.8	44.2	82.1	127.7	197.6	139.5	57.2		0.95183	0.99223	1.11096	1.06651	0.890966	1.0025
1012	1012	3029	Q9D735	Telomerase RNA component interacting RNase OS=Mus musculus OX=10090 GN=Trir PE=1 SV=1	Trir	18.4	9.67	3348	50	158	11	0	6491.7	5767.5	6763.1	3140.6	6296.2	5056.8	4720.6	3893.5	2302.1	3773.2	4141.1	3672.2	3756.4	2520.3	2303.3	6689.4	6218.8	5947.5	3059.9	5009.5	3827.2	4074.2	1113.7	2018.2	2076.6	6451.8	5685.4	6217.2	2540.6	4102.4		1.59682	1.20438	1.27587	1.1036	1.08725	1.25358
1013	1013	1774	Q8R050	Eukaryotic peptide chain release factor GTP-binding subunit ERF3A OS=Mus musculus OX=10090 GN=Gspt1 PE=1 SV=2	Gspt1	68.6	5.21	1002	24	76	12	0	667.5	313.2	464.9	498.6	2988.7	906.3	464.1	571.4	493.1	2948.3	1087.8	610	772.9	541.2	2911.1	736.7	369	508.5	472.1	1162.6	841.4	570.7	1146.8	456.4	3611.1	795.1	413.4	377.6	448.5	2557.9		0.660833	0.890756	0.877303	0.909552	0.867585	0.841206
1014	1014	3855	P24452	Macrophage-capping protein OS=Mus musculus OX=10090 GN=Capg PE=1 SV=2	Capg	39.2	7.2	1546	35	77	8	0	251.2	174.1	421.5		309.6	305.1	176.7	655.4		442.7	486.5	220.3	876.2		1262.4	272	142.3	629.2		246.9	898.3	298.5	3418.6		1384.9	318.5	159.8	417.1		329.9	Acetyl [N-Term]	0.636405	0.904358	1.04392	NA	0.7452	0.832471
1015	1015	2702	O70494	Transcription factor Sp3 OS=Mus musculus OX=10090 GN=Sp3 PE=1 SV=2	Sp3	82.3	5.26	2036	16	77	9	0	1225.3	920.7	765.1	888	1416.8	909.5	966	560.5	697.9	927.7	624.7	480.5	487.8	516.9	326	1274.8	925.7	711.1	898.2	1339.9	535	516	215.4	539.8	352.3	1115.2	833.6	731	818.8	922.9		1.30419	0.86294	1.22617	1.17323	0.994826	1.11227
1016	1016	613	Q91ZV0	Melanoma inhibitory activity protein 2 OS=Mus musculus OX=10090 GN=Mia2 PE=1 SV=3	Mia2	156.4	4.55	369	16	51	16	0	86.3	129.6	59.2	197.5	323.4	88.9	153.8	75.1	202.9	309.3	107	204	93.6	203.7	320.4	89	152.8	72.8	238	278.7	86.4	190.4	61	158.9	335.3	103.2	135	63.2	173.7	291.5		0.841545	0.877763	1.16085	0.856087	0.942451	0.93574
1017	1017	3234	Q3UH06	Ras-responsive element-binding protein 1 OS=Mus musculus OX=10090 GN=Rreb1 PE=1 SV=2	Rreb1	184	6.73	1059	15	67	13	1	150.5	172.4	73.9	316.1	527.5	173.4	206.8	71.4	325.7	592.9	144.2	191.8	64.6	321.8	327.5	138.7	195.1	94.1	353.2	492.8	100.8	189.2	18.4	261.9	327.7	186.8	196.8	100.6	335.1	549.4	Acetyl [N-Term]	1.40896	0.951644	1.07728	1.02886	0.926632	1.07868
1018	1018	2693	P31725	Protein S100-A9 OS=Mus musculus OX=10090 GN=S100a9 PE=1 SV=3	S100a9	13	7.17	1798	52	149	7	0	2425.2	2288.2	1549.8	409.9	1034.3	2315.9	2244.9	2058.9	1003	1766.6	11487.5	6602.4	6097.4	1565.9	9112.9	2639.5	1908.2	1411.2	299.6	871.5	20714.4	2517.9	18185.7	2077.5	8569	2780	1728.7	2490.4	834.5	3052.8		1.20958	0.770057	1.2004	0.832004	1.72807	1.14802
1019	1019	1334	P14901	Heme oxygenase 1 OS=Mus musculus OX=10090 GN=Hmox1 PE=1 SV=1	Hmox1	32.9	6.54	866	39	52	7	0	127.2	13.1	619.8	64.9	85.5	169.4	22	582.2	54.5	82.1	209.1	30.6	556.2	52.3	99	159.7	9.6	619.8	60.1	73.6	378.5	43.9	2132.8	32.5	102.8	205.8	25.8	588.1	49.6	81.9	Acetyl [N-Term]	1.01013	1.17273	1.21488	0.910092	0.997564	1.06108
1020	1020	3140	P62702	40S ribosomal protein S4, X isoform OS=Mus musculus OX=10090 GN=Rps4x PE=1 SV=2	Rps4x	29.6	10.15	1250	40	71	10	0	429	474.5	785.4	49.9	240.4	939.5	493.3	792.3	75.6	364.2	1162.2	484.5	713.9	61.5	676.7	806.7	260.9	926.2	49.7	276.7	779.1	916	2801.4	63.4	585.2	765.8	255.2	496.9	49.9	239.3		0.627161	0.517332	0.815114	0.660053	0.657057	0.655344
1021	1021	2905	Q9Z2Q5	39S ribosomal protein L40, mitochondrial OS=Mus musculus OX=10090 GN=Mrpl40 PE=1 SV=2	Mrpl40	24.3	9.47	1995	45	105	9	0	1428.8	1861.6	1762.6	880.7	907.3	1151.4	1535.9	1652.8	1308.7	1052.9	1122.7	1875.9	1634	1373.3	678.2	1178	1484.2	1664.4	908.8	819.7	594.8	1876.3	236.5	1236.8	661.6	1323.3	1708.9	1611.5	1313.3	1259.9		0.975012	1.11264	1.1493	1.00351	1.1966	1.08741
1022	1022	187	Q6NSR8	Probable aminopeptidase NPEPL1 OS=Mus musculus OX=10090 GN=Npepl1 PE=1 SV=1	Npepl1	55.9	6.84	1008	27	59	10	0	335.5	41.4	26.1		28.9	265.2	47.8	22.7		22.6	264.6	41.3	17.1		28.3	349.6	82.3	14.2		23.4	359.9	34.5	61.3		26.8	338.4	49.5	40.4		23.6		1.77974	1.03556	1.27602	NA	1.04425	1.28389
1023	1023	354	Q9CQE5	Regulator of G-protein signaling 10 OS=Mus musculus OX=10090 GN=Rgs10 PE=1 SV=1	Rgs10	21.1	6.81	3424	48	136	8	0	1019.7	281.5	459.1	500.2	672.3	1271	355.2	721.2	627.9	898.3	1343	505.1	757.8	779.3	1183.4	825.5	245.4	592.3	394.5	679.6	2329.2	450	851.2	761.7	1319.8	1279.9	350.3	619.7	621.8	820.1		0.859262	0.986205	1.007	0.990285	0.912947	0.95114
1024	1024	4467	Q9CR02	Translation machinery-associated protein 16 OS=Mus musculus OX=10090 GN=Tma16 PE=1 SV=1	Tma16	25.8	9.19	1246	44	100	10	0	2668.3	2267	1247.8	1420.9	1587.8	2015.7	1902.7	978.8	2268.2	2231.1	2089.6	1570.1	1033.9	1658.9	1188.3	2142.6	1922.8	1110.3	1267	1782.1	1197.8	1706.3	226.4	1555.6	1111.3	2765.7	2038.1	1224.5	2261.2	2597.3		1.25102	1.07116	1.37208	0.996914	1.16413	1.17106
1025	1025	4241	P99028	Cytochrome b-c1 complex subunit 6, mitochondrial OS=Mus musculus OX=10090 GN=Uqcrh PE=1 SV=2	Uqcrh	10.4	4.87	3746	73	204	7	0	9040.9	11588.2	8432.8	8338.4	8825.9	7537	10144.8	6182.4	6547.9	7293.8	6321.5	8575.2	5304.1	6345	4262.2	8439.4	12903.8	7693.7	7780.8	8779.2	5151.1	8841.2	1382.7	6471.4	4236	7774.2	10200.6	7535.4	6645	7520.5		1.21885	1.0055	1.03147	1.01483	1.03108	1.06035
1026	1026	3287	P28352	DNA-(apurinic or apyrimidinic site) lyase OS=Mus musculus OX=10090 GN=Apex1 PE=1 SV=2	Apex1	35.5	7.91	727	46	53	11	0	54.8	76.4	163.7	29.9	205.8	73.5	94.9	211.3	25.9	319.9	145.8	164.7	258	29.7	1150.2	64.6	51.6	194.2	26.4	199.5	175.9	159.1	1091.1	30.9	1120.1	79.6	83.4	164.5	15.9	290.5		0.778514	0.87882	1.08299	0.6139	0.908096	0.852465
1027	1027	2843	Q62192	CD180 antigen OS=Mus musculus OX=10090 GN=Cd180 PE=1 SV=2	Cd180	74.3	5.88	1050	18	62	8	0	146.7	71.4	308.5		39	303.8	103.3	471.1		45.1	462.4	175.2	616		93.9	148.5	37.9	435.8		41.4	750.5	164.8	1419.9		98.2	178.6	61.5	324.3		43.6		0.688389	0.595353	0.587887	NA	0.966741	0.709592
1028	1028	2343	P11438	Lysosome-associated membrane glycoprotein 1 OS=Mus musculus OX=10090 GN=Lamp1 PE=1 SV=2	Lamp1	43.8	8.4	3205	13	151	5	0	3145.5	4415.8	3708.1	3095.5	3331.4	5326.1	5387.2	5061.7	4647.5	5059.7	5028.7	6811	4863.2	4420.6	5430.4	3499.2	3111.3	4353.3	2701.3	2737.7	6499.6	8030.3	2354.5	5632.6	6109.7	4375.9	4480.3	3921.8	3871.3	4270.9		0.774799	0.831657	0.821596	0.832985	0.844101	0.821028
1029	1029	4702	Q6NXN1	SUZ domain-containing protein 1 OS=Mus musculus OX=10090 GN=Szrd1 PE=1 SV=1	Szrd1	17	9	2642	66	142	8	0	2052.2	1336.6	1613.6	3225	1711.6	1702.9	1351.3	1419.7	2885.2	1594.5	1395.9	1293.6	1344.1	3058.7	876.6	1762.4	1568.1	1644.8	3484.5	1867.7	1157.9	1035.1	353.8	2388.5	964.5	1636.5	1332.5	1561	2928.1	1625.7	Acetyl [N-Term]	1.09953	0.986087	0.961008	1.01487	1.01957	1.01621
1030	1030	3433	Q3UEB3	Poly(U)-binding-splicing factor PUF60 OS=Mus musculus OX=10090 GN=Puf60 PE=1 SV=2	Puf60	60.2	5.29	526	29	47	13	0	283.6	100.4	147.7	132.8	77.3	345.2	141.8	210.9	164.2	107.6	466.7	171	243.8	140.8	206.9	294.5	78.3	196.3	159.4	69.3	449	244.1	509.2	171.1	241.6	343.9	110.8	131.9	133.5	82.7		0.625415	0.781382	0.996234	0.813033	0.768587	0.79693
1031	1031	2073	Q9D0B6	Protein PBDC1 OS=Mus musculus OX=10090 GN=Pbdc1 PE=1 SV=1	Pbdc1	22.2	4.55	940	57	65	10	0	246.6	70.4	63.6		93.4	447.9	67	110.4		193.4	712.1	91.3	193.2		459.9	335.9	35.7	80.8		96.5	587.1	98.7	148.8		444.2	246.4	46.4	37.5		198.6		0.339674	0.692537	0.550123	NA	1.02689	0.652305
1032	1032	3711	Q03267	DNA-binding protein Ikaros OS=Mus musculus OX=10090 GN=Ikzf1 PE=1 SV=2	Ikzf1	57.3	6.52	4507	21	164	10	2	2427.4	2963.7	1556.9	2106.6	1566.5	2676.6	3988.3	2469.8	3366.6	2980.8	3204.2	3985.3	2840.5	2699.2	2859.1	2794.9	2753.7	2317.5	2269.7	2435.2	2728	3848.7	2020.8	3396.2	2999.5	2176.7	2827.7	1542.6	2506.4	2671.4		0.624585	0.708999	0.813233	0.74449	0.896202	0.757502
1033	1033	800	Q8VHL1	Histone-lysine N-methyltransferase SETD7 OS=Mus musculus OX=10090 GN=Setd7 PE=1 SV=2	Setd7	40.5	4.65	971	40	93	10	0	514.3	360	529.1	209.9	380.3	905.6	429.9	827.9	446.7	686.7	1094.5	740.1	929.1	599.8	1078	556	265.6	659.5	167.3	313	1268	611.4	470.8	674.3	1174.4	475.2	388.4	589.2	375	748.6		0.71168	0.903466	0.524735	0.83949	1.09014	0.813902
1034	1034	95	Q71FD7	Filamin-binding LIM protein 1 OS=Mus musculus OX=10090 GN=Fblim1 PE=1 SV=2	Fblim1	41	6.51	505	45	54	10	0	254.3		258.6	216	743.2	238.9		266	195.7	1044	206.5		202	236.7	737.3	232.6		289.3	249.1	872.7	201.2		484.6	245.7	722.1	212.9		249.2	200.3	813		0.936842	NA	0.891168	1.02351	0.778736	0.907563
1035	1035	1243	P27612	Phospholipase A-2-activating protein OS=Mus musculus OX=10090 GN=Plaa PE=1 SV=4	Plaa	87.2	6.14	300	20	27	15	0	5.3	58.3	519.2	83.1		17.4	71.8	402.2	96.1		18.5	92.7	329.5	67.2		14.1	54.7	376.2	91.9		24.2	67.6	365.5	84		15.4	68.3	466.5	124.8			1.15987	0.951253	0.885057	1.29865	NA	1.07371
1036	1036	3777	P12787	Cytochrome c oxidase subunit 5A, mitochondrial OS=Mus musculus OX=10090 GN=Cox5a PE=1 SV=2	Cox5a	16.1	6.54	4302	62	346	8	0	7329.5	9930.1	6478.8	14987.8	10171.5	7198.7	9001.4	7530.5	14547.8	9257.6	6970.5	9752.4	8256.9	14975.4	8987	7305.7	9504.6	6849.5	14869.2	9667.2	6179.6	8446.9	2848.6	17021.1	9902.4	5390	8494.1	5940.8	13962.8	9677.4		0.788898	0.943642	0.748746	0.959788	1.04535	0.897284
1037	1037	939	P39447	Tight junction protein ZO-1 OS=Mus musculus OX=10090 GN=Tjp1 PE=1 SV=2	Tjp1	194.6	6.64	1134	10	62	13	0	119.1	32.3	83	25.6	297	124.8	64.3	83	16.6	320.7	92.4	63.6	74	32.2	189.3	106.2	50	88.1	23.7	260	99.5	30.6	63.4	36.5	216.2	152.9	79.8	81.6	29	250.7		0.983133	1.24106	1.22516	1.74699	0.781727	1.19561
1038	1038	2166	Q9DC51	Guanine nucleotide-binding protein G(k) subunit alpha OS=Mus musculus OX=10090 GN=Gnai3 PE=1 SV=3	Gnai3	40.5	5.69	1519	33	80	10	0	470.6	88.9	266.2		34.8	505.5	127.1	364.8		47.3	483	89.8	351.7		42.6	392.5	69.6	316.2		41.3	474.6	124.3	404		42.9	517.9	107.9	285.5		33.3		0.782621	0.848938	1.02453	NA	0.704017	0.840026
1039	1039	2745	Q8R464	Cell adhesion molecule 4 OS=Mus musculus OX=10090 GN=Cadm4 PE=1 SV=1	Cadm4	42.7	6.3	1208	30	55	7	0	157.8	111.1	259.7	252	502.8	209.6	146.1	405.6	422.4	542.5	172.1	163	320.7	448.1	338.9	138.4	89.5	341.2	285.2	416	226.4	139.4	226.3	396.2	340	183.5	142.6	399.9	326.6	492.1		0.985947	0.976044	0.875477	0.773201	0.907097	0.903553
1040	1040	2878	Q9CZ13	Cytochrome b-c1 complex subunit 1, mitochondrial OS=Mus musculus OX=10090 GN=Uqcrc1 PE=1 SV=2	Uqcrc1	52.8	6.21	1050	27	55	9	0	91.9	19.9	283		73.9	161.7	23.1	403.7		135.4	250.7	35	415.9		364.5	138	10.3	305.4		84.9	278.1	47.5	1660.1		348.6	122.1	10.2	201.8		116		0.499876	0.441558	0.755102	NA	0.856721	0.638314
1041	1041	1830	Q9JIF7	Coatomer subunit beta OS=Mus musculus OX=10090 GN=Copb1 PE=1 SV=1	Copb1	107	6	300	24	40	17	0	151.3	30.6	155.3		18.8	127.5	27.6	190.3		33.4	147.1	46.6	241.1		106.3	100.6	22.4	186		23.6	151.2	43	1123.3		108.1	201.6	21.6	137.7		21.7	Acetyl [N-Term]	0.723594	0.782609	1.58118	NA	0.649701	0.93427
1042	1042	3702	Q9D6J6	NADH dehydrogenase [ubiquinone] flavoprotein 2, mitochondrial OS=Mus musculus OX=10090 GN=Ndufv2 PE=1 SV=2	Ndufv2	27.3	7.4	2896	39	129	8	0	911.8	517.6	892.1	764.8	696	1131.9	740.7	962.4	917.6	1028.8	1096.4	625.7	891	942.3	1069.9	1088.3	410.3	957.1	885.3	691.8	792.4	661.2	806	1030.8	1113.9	928	491.9	824.2	789.5	943.3		0.856401	0.664102	0.81986	0.860397	0.916893	0.823531
1043	1043	2960	Q9JJ48	Zinc finger CCCH domain-containing protein 8 OS=Mus musculus OX=10090 GN=Zc3h8 PE=1 SV=2	Zc3h8	34.9	9.01	618	35	51	11	0	878.7	422.6	304.9	225.9	266.6	753.5	503.1	216.4	208.2	266.1	612.1	500	213.6	211.3	212.7	852.3	473.4	281.2	229.4	289.4	451.4	372.5	106.6	171.1	221.8	871.1	515.3	275	237	288.3	Acetyl [N-Term]	1.27079	1.02425	1.15607	1.13833	1.08343	1.13457
1044	1044	3260	O70139	cAMP-dependent protein kinase inhibitor gamma OS=Mus musculus OX=10090 GN=Pkig PE=1 SV=1	Pkig	7.9	4.21	2698	93	81	5	0	309.9	480.2	316.7	660.4	381.7	278.6	474.8	241.6	532.9	360.6	191	401.8	207.4	498.8	181	276.2	552	256.3	648.3	417.5	180.3	362.5	38.1	454.5	195.8	308.9	522.4	322.8	506.8	363.4	Acetyl [N-Term]	1.33609	1.10025	1.10876	0.951023	1.00776	1.10078
1045	1045	3703	Q9D6S7	Ribosome-recycling factor, mitochondrial OS=Mus musculus OX=10090 GN=Mrrf PE=1 SV=1	Mrrf	29	9.85	1742	39	88	7	0	984.4	792.7	732.6	675.1	134.2	712.4	724.8	544.9	671.4	137.4	932.3	828	572.8	774.8	85.8	796	786.5	783	660.2	132.7	561.5	696.6	280.8	674.9	101.4	880.7	730.9	589.2	734.7	148.3		1.0813	1.00842	1.23624	1.09428	1.07933	1.09991
1046	1046	85	Q9DCD5	Tight junction-associated protein 1 OS=Mus musculus OX=10090 GN=Tjap1 PE=1 SV=1	Tjap1	59.4	6.07	646	33	33	13	0	69.2			93.8	48.7	74.2			140.7	50.1	59.8			127.6	23.9	44.5			70.7	52.4	73.6			104.9	32.3	79.3			106.7	53.3		NA	NA	1.06873	0.758351	1.06387	0.963652
1047	1047	2009	P19536	Cytochrome c oxidase subunit 5B, mitochondrial OS=Mus musculus OX=10090 GN=Cox5b PE=1 SV=1	Cox5b	13.8	8.38	2051	43	209	8	0	6636	7503.5	6585.7	5521.8	5282.2	8299.8	9118.9	9796.5	7563.4	9067.6	8744	11115.2	11729.2	8914.4	9784	6620.7	5393.8	7339.9	5737.4	5776.9	7584.7	10623.1	6548.1	10815.4	11142.8	5862.2	6442.9	5803.1	7173.6	8762.8		0.592365	0.706544	0.706306	0.948462	0.966386	0.784012
1048	1048	4479	Q8K1L5	E3 ubiquitin-protein ligase PPP1R11 OS=Mus musculus OX=10090 GN=Ppp1r11 PE=1 SV=1	Ppp1r11	14.5	6.09	2516	34	113	4	0	1964.2	792.7	2038.7	1364.1	1497.3	2012.8	887.7	1890.8	1559.4	1529.8	2107.8	1016.2	2128.3	1958.2	1241.2	1984	870.1	2178.7	1537.4	1398	2878.5	968.3	980.1	1746.3	1529.3	1859.5	892.3	1927.1	1455.7	1453.1		1.0192	1.00518	0.923837	0.9335	0.949863	0.966316
1049	1049	4523	Q8BJ05	Zinc finger CCCH domain-containing protein 14 OS=Mus musculus OX=10090 GN=Zc3h14 PE=1 SV=1	Zc3h14	82.4	7.37	921	20	55	12	0	222	215.2	12.8	94.3	170	238.3	214.7	26	75	234.1	208.8	235	19	104	200.7	235.1	265	22.4	109.5	196.2	232.8	224.2	13.7	76.8	210.3	242.9	232.5	16.8	89.1	207.8		0.646154	1.08291	1.0193	1.188	0.887655	0.964804
1050	1050	4399	P42703	Leukemia inhibitory factor receptor OS=Mus musculus OX=10090 GN=Lifr PE=1 SV=1	Lifr	122.5	6.04	866	18	83	15	0	438.3	705.5	251.1	507	443.8	637.6	820.6	404	826.3	697.6	796.1	1074.5	472.6	758.5	584.1	296.6	568.8	280.2	494.1	408.6	793.5	1420.2	157.8	782.6	515.2	538.2	996	426.7	730	682.9		1.05619	1.21375	0.844103	0.883456	0.978928	0.995284
1051	1051	2173	Q9CPW4	Actin-related protein 2/3 complex subunit 5 OS=Mus musculus OX=10090 GN=Arpc5 PE=1 SV=3	Arpc5	16.3	5.67	1230	50	60	8	0	315.3	65.7	362.6	111.8	386.4	449.3	84.3	461	108.4	474	600.1	83.7	527.3	105.8	1321.2	342.4	55	394.3	116.4	380.9	1001	63.3	2434.3	149.2	1428.9	397.8	73.8	343.1	118.4	433.7		0.744252	0.875445	0.885377	1.09225	0.914979	0.902461
[truncated: 1,430 more rows]
[truncated: 170 more columns]

## Sheet: 2 Phosphopeptides
Order	Confidence	PSM Ambiguity	ProteinSequence	Sequence	Annotated Sequence	Modifications	Modifications all possible sites	Modifications in Master Proteins	Modifications in Master Proteins all Sites	Qvality PEP	Qvality q-value	SVM_Score	Number of Protein Groups	Number of Proteins	Number of PSMs	Master Protein Accessions	First Master Protein Accession	Master Protein Descriptions	GN	GN_phosphosite(s)	Sig change in any comparison?	Protein Accessions	Positions in Master Proteins	Number of Missed Cleavages	Theo MHplus in Da	Sequence Length	Number of Razor Quan Results	Abundance Ratio Control Eu-Myc Chk1i Eu-Myc	Abundance Ratio Control T505A Chk1i T505A	Abundance Ratio Control cRel Chk1i cRel	Abundance Ratio log2 Control Eu-Myc Chk1i Eu-Myc	Abundance Ratio log2 Control T505A Chk1i T505A	Abundance Ratio log2 Control cRel Chk1i cRel	Abundance Ratio P-Value Control Eu-Myc Chk1i Eu-Myc	Abundance Ratio P-Value Control T505A Chk1i T505A	Abundance Ratio P-Value Control cRel Chk1i cRel	Abundance Ratio Adj P-Value Control Eu-Myc Chk1i Eu-Myc	Abundance Ratio Adj P-Value Control T505A Chk1i T505A	Abundance Ratio Adj P-Value Control cRel Chk1i cRel	Abundance Ratio Variability in Percent Control Eu-Myc Chk1i Eu-Myc	Abundance Ratio Variability in Percent Control T505A Chk1i T505A	Abundance Ratio Variability in Percent Control cRel Chk1i cRel	Abundance Ratio Weight Control Eu-Myc Chk1i Eu-Myc	Abundance Ratio Weight Control T505A Chk1i T505A	Abundance Ratio Weight Control cRel Chk1i cRel	Abundance Ratios by Bio Rep Control Eu-MycRep1 Chk1i Eu-MycRep1	Abundance Ratios by Bio Rep Control Eu-MycRep2 Chk1i Eu-MycRep2	Abundance Ratios by Bio Rep Control Eu-MycRep3 Chk1i Eu-MycRep3	Abundance Ratios by Bio Rep Control Eu-MycRep4 Chk1i Eu-MycRep4
[truncated: 6,570 more rows]
[truncated: 514 more columns]
